# Supplementary material for: Plasma proteomic profiling of young and old mice reveals cadherin-13 prevents age-related bone loss
Source: Aging (Albany NY). 2020 May 12;12(9):8652–68. doi: 10.18632/aging.103184 (PMC7244053; doi:10.18632/aging.103184)
Supplement: Supplementary Table 1 [file aging-12-103184-s003..xlsx]

## Sheet: protein_list
Supplementary Table 1. List of proteins identified in mouse plasmas
Accession	Description	Entry Name	Gene names	Y1_OG (Spec count)	Y2_OG (Spec count)	Y3_OG (Spec count)	Y4_OG (Spec count)	Y5_OG (Spec count)	Y6_OG (Spec count)	Y1_HP (Spec count)	Y2_HP (Spec count)	Y3_HP (Spec count)	Y4_HP (Spec count)	Y5_HP (Spec count)	Y6_HP (Spec count)	O1_OG (Spec count)	O2_OG (Spec count)	O3_OG (Spec count)	O4_OG (Spec count)	O5_OG (Spec count)	O6_OG (Spec count)	O1_HP (Spec count)	O2_HP (Spec count)	O3_HP (Spec count)	O4_HP (Spec count)	O5_HP (Spec count)	O6_HP (Spec count)	G_value OG	SAM (D) OG	OG_Fold Change (Old/Young)	G_value HP	SAM (D) HP	HP_Fold Change (Old/Young)	G-val OG_HP	SAM (D) OG_HP
P01872	Ig mu chain C region OS=Mus musculus GN=Ighm PE=1 SV=2	IGHM_MOUSE	Ighm Igh-6	66	115	73	45	94	42	72	115	120	107	92	68	189	225	894	415	638	254	185	365	883	558	426	241	1877.44	3.213	6.01149	1203.2	4.027	4.63066	3073.93	4.86
Q61646	Haptoglobin OS=Mus musculus GN=Hp PE=1 SV=1	HPT_MOUSE	Hp	21	17	8	35	17	26	34	32	28	63	36	89	427	13	97	98	250	402	375	27	279	269	327	615	1078.29	2.695	10.379	1179.14	3.269	6.70922	2255.93	4.361
Q19LI2	Alpha-1B-glycoprotein OS=Mus musculus GN=A1bg PE=1 SV=1	A1BG_MOUSE	A1bg	204	144	312	0	0	0	313	272	522	103	5	5	526	822	1074	0	0	0	579	1225	1358	69	13	8	1340.32	1.506	3.6697	916.01	1.446	2.66557	2235.17	2.185
P07759	Serine protease inhibitor A3K OS=Mus musculus GN=Serpina3k PE=1 SV=2	SPA3K_MOUSE	Serpina3k Mcm2 Spi2	418	454	775	842	1142	1050	594	741	960	955	885	979	144	89	42	656	920	645	202	203	142	807	680	722	755.541	-1.951	0.533219	529.386	-2.438	0.538913	1282.59	-3.023
P28665	Murinoglobulin-1 OS=Mus musculus GN=Mug1 PE=1 SV=3	MUG1_MOUSE	Mug1 Mug-1	750	921	1116	1114	1985	1375	872	1327	1331	1534	1425	1374	326	331	306	1019	1719	1047	326	485	504	1449	1309	1152	568.79	-1.719	0.653904	375.842	-1.717	0.664505	941.415	-2.452
Q61147	Ceruloplasmin OS=Mus musculus GN=Cp PE=1 SV=2	CERU_MOUSE	Cp	512	575	554	328	576	376	583	978	1014	783	607	595	1158	1104	858	378	685	573	1006	1573	1262	748	712	743	608.807	2.371	1.62821	293.402	2.307	1.32544	871.222	3.401
P01837	Ig kappa chain C region OS=Mus musculus PE=1 SV=1	IGKC_MOUSE	0	6	8	5	2	4	2	12	24	21	15	13	5	23	14	44	24	40	20	41	62	188	103	72	48	113.279	4.992	6.11111	266.432	3.765	5.71111	381.116	4.223
Q03734	Serine protease inhibitor A3M OS=Mus musculus GN=Serpina3m PE=1 SV=2	SPA3M_MOUSE	Serpina3m	183	219	325	341	553	477	250	323	362	340	336	320	83	70	40	231	402	307	95	109	82	276	259	253	324.282	-2.156	0.540038	177.271	-3.044	0.556189	499.762	-3.082
Q63805	Alpha-1-acid glycoprotein 3 OS=Mus musculus GN=Orm3 PE=2 SV=1	A1AG3_MOUSE	Orm3 Agp-3 Orm-3	0	41	0	0	0	0	28	0	0	0	0	0	292	0	69	0	0	0	0	31	70	0	0	99	311.04	1.122	8.80488	96.7181	1.457	7.14286	407.389	1.507
A6X935	Inter alpha-trypsin inhibitor, heavy chain 4 OS=Mus musculus GN=Itih4 PE=1 SV=2	ITIH4_MOUSE	Itih4	194	221	229	100	176	138	342	474	517	341	259	300	339	421	296	131	288	318	438	694	704	369	390	541	250.451	2.841	1.69471	190.709	3.447	1.40439	431.152	3.718
Q00898	Alpha-1-antitrypsin 1-5 OS=Mus musculus GN=Serpina1e PE=1 SV=1	A1AT5_MOUSE	Serpina1e Dom5 Spi1-5	193	181	231	465	902	672	150	208	353	282	281	330	113	150	153	286	472	267	90	182	230	275	232	217	374.182	-1.684	0.545008	34.3959	-1.417	0.764339	364.246	-1.743
P29621	Serine protease inhibitor A3C OS=Mus musculus GN=Serpina3c PE=2 SV=1	SPA3C_MOUSE	Serpina3c Klkbp	55	110	153	87	210	107	0	188	0	0	0	0	0	0	0	82	154	83	0	0	0	0	0	0	167.964	-2.381	0.441828	125.18	-0.995	0	254.049	-1.828
P01592	Immunoglobulin J chain OS=Mus musculus GN=Igj PE=2 SV=4	IGJ_MOUSE	Jchain Igj	7	6	6	8	7	5	6	11	6	9	10	7	14	18	54	22	26	14	18	40	97	53	33	22	74.5341	2.774	3.79487	123.993	3.497	5.36735	198.541	4.573
P28666	Murinoglobulin-2 OS=Mus musculus GN=Mug2 PE=2 SV=2	MUG2_MOUSE	Mug2 Mug-2	227	299	374	281	635	333	359	525	530	581	593	559	107	110	126	287	542	339	140	194	207	577	561	458	109.953	-1.493	0.703118	135.368	-1.6	0.679059	245.562	-2.253
P07361	Alpha-1-acid glycoprotein 2 OS=Mus musculus GN=Orm2 PE=1 SV=1	A1AG2_MOUSE	Orm2 Agp-2 Orm-2	50	80	133	82	71	44	63	88	119	46	28	38	399	60	118	57	92	81	190	74	167	49	36	156	125.938	1.095	1.75435	115.464	1.668	1.75916	240.284	1.755
Q00896	Alpha-1-antitrypsin 1-3 OS=Mus musculus GN=Serpina1c PE=1 SV=2	A1AT3_MOUSE	Serpina1c Dom3 Dom6 Spi1-3 Spi1-6	224	234	319	498	909	653	0	336	473	293	289	311	177	281	211	309	565	319	0	0	354	312	304	275	204.962	-1.504	0.656327	39.1499	-0.69	0.731492	235.985	-1.345
Q06770	Corticosteroid-binding globulin OS=Mus musculus GN=Serpina6 PE=1 SV=1	CBG_MOUSE	Serpina6 Cbg	76	67	58	36	61	44	49	84	84	32	19	17	167	197	107	30	57	42	71	245	193	25	23	22	96.2366	1.478	1.75439	96.7192	1.395	2.03158	191.386	2.04
P06330	Ig heavy chain V region AC38 205.12 OS=Mus musculus PE=1 SV=1	HVM51_MOUSE	0	5	10	5	9	13	7	4	0	5	6	0	0	8	26	45	35	43	22	6	18	55	24	22	16	88.8397	3.677	3.65306	83.2796	3.4	9.4	169.618	4.492
P03977	Ig kappa chain V-III region 50S10.1 OS=Mus musculus PE=1 SV=1	KV3A4_MOUSE	0	0	0	0	0	0	0	0	0	0	0	0	0	15	12	25	17	13	3	8	10	16	13	6	3	96.5717	4.249	#DIV/0!	43.3331	5.071	#DIV/0!	141.607	5.163
P13020	Gelsolin OS=Mus musculus GN=Gsn PE=1 SV=3	GELS_MOUSE	Gsn Gsb	275	395	393	181	348	221	588	933	846	768	626	600	200	375	240	189	297	186	310	610	616	559	507	445	20.4166	-0.959	0.820188	150.342	-7.662	0.698693	155.791	-1.932
Q8K0E8	Fibrinogen beta chain OS=Mus musculus GN=Fgb PE=2 SV=1	FIBB_MOUSE	Fgb	546	965	1257	747	1041	839	804	1654	1684	1350	1080	1118	818	780	1162	861	1394	1308	887	1565	1724	1330	1304	1455	128.39	1.875	1.17201	64.9813	2.389	1.07477	187.743	2.915
P68033	Actin, alpha cardiac muscle 1 OS=Mus musculus GN=Acta1 PE=1 SV=1	ACTC_MOUSE	Actc1 Actc	0	0	0	0	0	0	0	0	0	0	0	0	49	46	0	0	27	0	0	0	0	0	0	0	133.528	1.983	#DIV/0!	0.166667	0	#DIV/0!	128.298	1.759
Q9QWK4	CD5 antigen-like OS=Mus musculus GN=Cd5l PE=1 SV=3	CD5L_MOUSE	Cd5l Aim Api6	22	22	20	11	24	14	10	18	12	13	19	12	45	17	32	30	47	36	53	54	60	58	48	38	33.7696	3.862	1.83186	124.368	7.604	3.70238	144.065	7.401
P05367	Serum amyloid A-2 protein OS=Mus musculus GN=Saa2 PE=1 SV=1	SAA2_MOUSE	Saa2	5	8	11	5	3	0	2	6	11	0	3	10	43	15	9	9	9	42	42	14	11	7	13	68	67.3223	2.303	3.96875	84.6235	2.009	4.84375	152.497	3.16
P07758	Alpha-1-antitrypsin 1-1 OS=Mus musculus GN=Serpina1a PE=1 SV=4	A1AT1_MOUSE	Serpina1a Dom1 Spi1-1	219	224	314	498	906	658	247	331	459	295	282	307	174	255	209	300	553	310	142	288	349	301	296	273	230.603	-1.562	0.638879	8.84621	-1.334	0.858407	192.107	-1.499
Q00623	Apolipoprotein A-I OS=Mus musculus GN=Apoa1 PE=1 SV=2	APOA1_MOUSE	Apoa1	887	1689	1704	1166	1915	1327	1676	3179	2954	2554	2492	2286	823	1574	973	1038	1880	1347	1080	2510	1905	2478	2453	2197	39.067	-0.828	0.878798	104.358	-1.483	0.833697	139.321	-1.325
P18531	Ig heavy chain V region 3-6 OS=Mus musculus GN=Ighv3-6 PE=1 SV=1	HVM60_MOUSE	Ighv3-6 Gm16932	0	2	1	1	1	0	0	3	1	0	0	0	5	0	77	2	4	4	8	1	30	4	3	3	90.122	1.154	18.4	30.4905	1.845	12.25	121.949	1.59
P05366	Serum amyloid A-1 protein OS=Mus musculus GN=Saa1 PE=1 SV=2	SAA1_MOUSE	Saa1	11	15	16	5	8	6	10	16	16	22	22	21	33	22	12	15	20	41	65	27	19	26	42	116	40.4082	2.885	2.34426	95.2511	2.054	2.75701	135.343	2.879
P02088	Hemoglobin subunit beta-1 OS=Mus musculus GN=Hbb-b1 PE=1 SV=2	HBB1_MOUSE	Hbb-b1	44	64	63	90	136	94	63	138	91	113	103	96	34	32	32	19	37	25	56	64	92	70	69	61	155.53	-4.433	0.364562	22.1726	-2.986	0.682119	143.062	-4.836
P22599	Alpha-1-antitrypsin 1-2 OS=Mus musculus GN=Serpina1b PE=1 SV=2	A1AT2_MOUSE	Serpina1b Aat2 Dom2 Spi1-2	284	308	378	522	962	714	286	412	596	318	334	350	207	358	260	348	640	373	178	398	454	320	306	311	179.157	-1.538	0.690025	10.3981	-1.149	0.856707	157.656	-1.439
Q61704	Inter-alpha-trypsin inhibitor heavy chain H3 OS=Mus musculus GN=Itih3 PE=1 SV=3	ITIH3_MOUSE	Itih3	60	71	73	41	79	53	96	152	158	113	99	123	170	129	68	45	103	106	200	179	169	133	122	195	79.1206	2.299	1.64721	58.5596	2.321	1.34683	135.073	3.082
Q00897	Alpha-1-antitrypsin 1-4 OS=Mus musculus GN=Serpina1d PE=2 SV=1	A1AT4_MOUSE	Serpina1d Dom4 Spi1-4	264	271	370	489	941	684	269	406	570	299	335	335	197	381	247	298	656	338	166	379	421	303	304	300	160.259	-1.423	0.701226	12.3693	-1.285	0.84598	147.813	-1.398
Q07968	Coagulation factor XIII B chain OS=Mus musculus GN=F13b PE=1 SV=2	F13B_MOUSE	F13b Cf13b	146	155	157	136	148	111	139	207	187	152	95	89	72	46	88	86	136	104	69	131	95	104	82	79	84.3939	-3.879	0.623681	40.5057	-3.291	0.644419	123.713	-4.217
Q9DD06	Retinoic acid receptor responder protein 2 OS=Mus musculus GN=Rarres2 PE=1 SV=1	RARR2_MOUSE	Rarres2	6	4	1	0	0	1	5	2	4	2	2	2	15	27	10	0	2	1	17	61	24	4	3	2	30.3315	1.53	4.58333	55.1341	1.835	6.52941	86.255	2.482
P01027	Complement C3 OS=Mus musculus GN=C3 PE=1 SV=3	CO3_MOUSE	C3	979	1177	1423	703	1191	922	1395	2193	2274	1725	1353	1473	998	713	962	527	1213	1079	1262	1651	1675	1314	1370	1531	56.5884	-1.381	0.858796	35.4061	-1.838	0.845386	89.5076	-1.655
P01758	Ig heavy chain V region 108A OS=Mus musculus GN=Igh-VJ558 PE=4 SV=1	HVM14_MOUSE	Igh-VJ558	5	9	0	8	0	0	0	0	0	0	0	0	0	0	29	23	0	14	0	0	37	15	13	11	26.8619	1.297	3	57.6856	2.371	#DIV/0!	77.6044	2.416
P42703	Leukemia inhibitory factor receptor OS=Mus musculus GN=Lifr PE=1 SV=1	LIFR_MOUSE	Lifr	132	115	109	90	118	105	69	86	100	67	53	60	210	229	168	77	80	65	128	280	227	43	27	27	29.3912	0.955	1.23916	75.5573	1.276	1.68276	91.8642	1.451
P01942	Hemoglobin subunit alpha OS=Mus musculus GN=Hba PE=1 SV=2	HBA_MOUSE	Hba Hba-a1	51	103	62	110	135	69	135	268	198	297	318	236	60	82	52	47	89	50	110	111	181	198	201	157	24.2788	-1.676	0.716981	70.3312	-2.077	0.65978	94.3251	-1.774
P61939	Thyroxine-binding globulin OS=Mus musculus GN=Serpina7 PE=2 SV=1	THBG_MOUSE	Serpina7 Tbg	5	7	4	4	12	12	1	1	0	2	4	4	27	9	12	13	27	23	15	11	9	12	20	25	32.8664	3.578	2.52273	53.2881	4.399	7.66667	81.5059	4.89
P01654	Ig kappa chain V-III region PC 2880/PC 1229 OS=Mus musculus PE=1 SV=1	KV3A1_MOUSE	0	6	13	0	0	15	0	0	7	0	0	4	0	13	15	25	28	26	6	0	12	18	23	7	5	55.7664	2.917	3.32353	29.2529	2.398	5.90909	85.8046	3.216
Q91X72	Hemopexin OS=Mus musculus GN=Hpx PE=1 SV=2	HEMO_MOUSE	Hpx Hpxn	568	761	1085	553	1096	793	687	958	1035	797	723	719	985	636	938	616	1221	1008	751	857	1002	774	857	996	61.78	1.702	1.11285	39.9738	2.106	1.06465	101.716	1.806
P03953	Isoform 2 of Complement factor D OS=Mus musculus GN=Cfd	CFAD_MOUSE	Cfd Adn Df	76	89	95	36	57	41	169	246	217	140	142	140	43	57	50	39	47	30	94	156	131	110	112	79	21.9538	-1.759	0.675127	50.6842	-3.956	0.647059	72.8868	-2.166
Q8K182	Complement component C8 alpha chain OS=Mus musculus GN=C8a PE=2 SV=1	CO8A_MOUSE	C8a	67	84	99	111	157	126	84	114	147	204	191	189	56	11	23	109	149	115	48	20	24	210	151	138	31.4451	-1.193	0.718944	53.0428	-1.273	0.636168	83.7883	-1.817
Q60590	Alpha-1-acid glycoprotein 1 OS=Mus musculus GN=Orm1 PE=1 SV=1	A1AG1_MOUSE	Orm1 Agp1 Orm-1	71	101	148	99	104	64	88	118	159	75	50	63	364	70	118	68	99	88	140	111	180	76	60	165	51.1824	0.844	1.37479	42.0598	1.63	1.32369	93.4615	1.388
P04940	Ig kappa chain V-VI region NQ5-78.2.6 OS=Mus musculus PE=4 SV=1	KV6A6_MOUSE	0	2	4	0	2	3	2	1	3	0	1	0	0	2	5	15	7	17	4	2	3	12	13	28	5	21.53	2.571	3.84615	39.8902	2.312	12.6	60.455	3.545
P16882-2	Isoform 2 of Growth hormone receptor OS=Mus musculus GN=Ghr	GHR_MOUSE	Ghr	7	0	8	3	5	0	0	0	0	0	0	0	15	16	14	0	0	4	15	38	21	0	0	0	11.727	1.308	2.13043	58.1579	2.051	#DIV/0!	59.0206	2.496
P51885	Lumican OS=Mus musculus GN=Lum PE=1 SV=2	LUM_MOUSE	Lum Lcn Ldc	52	64	58	25	52	37	97	121	116	120	83	87	36	30	39	30	48	30	40	64	72	61	56	48	9.90151	-2.012	0.739583	60.865	-8.861	0.546474	64.6386	-3.88
P04945	Ig kappa chain V-VI region NQ2-6.1 OS=Mus musculus PE=2 SV=1	KV6AB_MOUSE	0	3	3	1	1	5	2	1	1	0	1	1	1	4	6	13	29	13	11	1	3	11	12	2	3	51.1511	2.287	5.06667	12.703	2.181	6.4	64.9494	2.534
P06728	Apolipoprotein A-IV OS=Mus musculus GN=Apoa4 PE=1 SV=3	APOA4_MOUSE	Apoa4	436	577	585	289	574	377	950	1259	1270	1118	870	772	411	538	409	375	577	415	503	870	872	997	895	758	0.0282142	0	0.960183	84.7017	-3.044	0.784581	49.3691	-1.077
Q91WP6	Serine protease inhibitor A3N OS=Mus musculus GN=Serpina3n PE=1 SV=1	SPA3N_MOUSE	Serpina3n Spi2	106	158	206	123	246	148	165	220	212	192	190	172	115	97	71	112	192	151	104	110	101	165	160	180	30.1967	-2.304	0.74772	31.7171	-2.563	0.712424	62.0681	-3.402
Q01279	Epidermal growth factor receptor OS=Mus musculus GN=Egfr PE=1 SV=1	EGFR_MOUSE	Egfr	68	61	73	91	131	117	139	137	165	228	219	198	59	30	32	80	113	86	89	64	59	216	171	145	22.377	-1.406	0.739372	43.3153	-1.454	0.685083	65.7681	-1.781
Q8VCM7	Fibrinogen gamma chain OS=Mus musculus GN=Fgg PE=2 SV=1	FIBG_MOUSE	Fgg	457	869	1078	588	1000	620	641	1247	1178	1075	922	958	707	622	855	617	1130	920	701	1217	1303	1062	1016	1133	23.2465	1.02	1.05182	40.3974	2.256	1.06826	62.6064	2.127
Q62009	Isoform 5 of Periostin OS=Mus musculus GN=Postn	POSTN_MOUSE	Postn Osf2	42	39	38	33	0	32	27	30	28	17	14	17	11	18	16	20	19	11	3	11	13	7	6	7	34.7589	-2.164	0.516304	32.0842	-4.873	0.353383	65.703	-2.823
P01029	Complement C4-B OS=Mus musculus GN=C4b PE=1 SV=3	CO4B_MOUSE	C4b C4	255	312	304	197	291	232	319	531	571	466	336	431	206	249	193	161	267	287	206	407	359	331	307	418	13.4895	-1.493	0.856694	45.0001	-2.985	0.76413	55.3117	-2.664
O35536	Tissue factor pathway inhibitor 2 OS=Mus musculus GN=Tfpi2 PE=2 SV=1	TFPI2_MOUSE	Tfpi2	0	0	0	0	0	0	0	0	0	0	0	0	9	3	7	0	0	0	7	11	6	0	0	1	16.9489	1.864	#DIV/0!	16.8333	2.127	#DIV/0!	35.3201	2.984
Q8BH61	Coagulation factor XIII A chain OS=Mus musculus GN=F13a1 PE=2 SV=3	F13A_MOUSE	F13a1 F13a	85	119	104	93	119	80	50	95	88	76	52	60	62	79	61	60	97	67	32	49	44	43	38	46	29.1012	-4.266	0.71	26.4401	-7.02	0.598575	54.6594	-2.267
P01638	Ig kappa chain V-V region L6 (Fragment) OS=Mus musculus PE=4 SV=1	KV5A6_MOUSE	0	0	2	0	2	3	0	0	0	0	0	0	0	3	3	5	8	12	9	0	0	5	9	6	5	23.6562	3.756	5.71429	15.8312	2.628	#DIV/0!	40.5375	4.122
P08121	Collagen alpha-1(III) chain OS=Mus musculus GN=Col3a1 PE=1 SV=4	CO3A1_MOUSE	Col3a1	9	13	5	3	8	6	4	8	4	5	5	6	2	0	2	3	1	1	0	0	1	0	0	0	21.4886	-3.458	0.204545	19.4321	-7.401	0.03125	41.3746	-4.833
P01899	H-2 class I histocompatibility antigen, D-B alpha chain OS=Mus musculus GN=H2-D1 PE=1 SV=2	HA11_MOUSE	H2-D1	7	0	0	0	0	0	7	0	0	0	0	0	7	12	0	0	11	8	10	18	0	0	0	13	17.8056	1.82	5.42857	17.7694	1.606	5.85714	36.6918	2.554
Q61703	Inter-alpha-trypsin inhibitor heavy chain H2 OS=Mus musculus GN=Itih2 PE=1 SV=1	ITIH2_MOUSE	Itih2	98	146	153	79	141	99	256	379	355	274	264	255	157	205	137	101	191	137	282	396	362	307	314	307	42.1935	2.556	1.29609	22.317	3.361	1.10376	59.3236	1.693
Q62009-2	Isoform 2 of Periostin OS=Mus musculus GN=Postn	POSTN_MOUSE	Postn Osf2	0	0	0	0	41	0	0	0	0	0	0	0	0	0	0	0	0	0	0	0	0	0	0	0	29.3951	-0.981	0	0.166667	0	#DIV/0!	25.7386	-0.981
O08677-2	Isoform LMW of Kininogen-1 OS=Mus musculus GN=Kng1	KNG1_MOUSE	Kng1 Kng	247	295	0	0	0	0	624	885	815	724	646	569	280	331	0	0	397	289	528	803	732	643	642	629	287.613	1.247	2.39299	0.141428	-0.265	0.932911	59.3937	0.589
Q61702	Inter-alpha-trypsin inhibitor heavy chain H1 OS=Mus musculus GN=Itih1 PE=1 SV=2	ITIH1_MOUSE	Itih1	140	126	123	112	171	136	199	278	285	253	240	208	173	194	148	121	193	150	245	306	300	271	258	282	24.3236	2.484	1.21163	25.495	3.492	1.13602	49.848	2.66
P01661	Ig kappa chain V-III region PC 4050 OS=Mus musculus PE=1 SV=1	KV3A9_MOUSE	0	0	0	0	0	0	2	0	0	0	0	0	0	3	3	6	11	8	1	0	3	2	4	2	1	26.8373	2.656	16	5.2625	2.809	#DIV/0!	33.1265	2.892
P01878	Ig alpha chain C region OS=Mus musculus PE=1 SV=1	IGHA_MOUSE	0	3	1	2	1	5	4	1	1	1	1	0	0	13	1	4	4	7	10	15	9	8	5	4	5	10.1701	1.973	2.4375	30.5658	2.836	11.5	37.7039	3.529
Q8BH35	Complement component C8 beta chain OS=Mus musculus GN=C8b PE=1 SV=1	CO8B_MOUSE	C8b	62	76	95	96	135	112	46	71	93	120	107	115	45	15	20	116	139	103	22	6	12	122	100	91	18.3869	-0.908	0.760417	30.0478	-1.179	0.639493	46.5776	-1.42
P29699	Alpha-2-HS-glycoprotein OS=Mus musculus GN=Ahsg PE=1 SV=1	FETUA_MOUSE	Ahsg Fetua	253	659	608	269	562	265	542	864	876	564	528	482	271	469	489	283	506	286	432	711	668	499	422	431	5.76452	-0.36	0.880734	25.4331	-1.637	0.82028	28.2079	-1.059
P01642	Ig kappa chain V-V region L7 (Fragment) OS=Mus musculus GN=Gm10881 PE=1 SV=1	KV5A9_MOUSE	Gm10881	1	1	1	1	2	0	1	0	1	0	0	0	3	6	8	6	6	4	1	4	14	5	1	1	19.7415	4.757	5.5	12.3361	1.921	13	33.318	4.06
Q9ET66	Peptidase inhibitor 16 OS=Mus musculus GN=Pi16 PE=2 SV=1	PI16_MOUSE	Pi16 Cripi	19	21	24	17	23	18	38	37	33	26	16	19	11	13	12	10	12	8	8	20	19	11	13	8	16.0426	-6.821	0.540984	24.847	-3.325	0.467456	40.9695	-5.866
P01751	Ig heavy chain V region 1-62-3 OS=Mus musculus GN=Ighv1-62-3 PE=4 SV=2	HVM07_MOUSE	Ighv1-72 Gm16709	0	0	0	0	0	0	0	0	0	0	0	0	0	0	0	0	9	0	0	1	0	12	11	0	3.42288	0.919	#DIV/0!	15.3258	1.584	#DIV/0!	19.5218	1.875
Q5I2A0	Serine protease inhibitor A3G OS=Mus musculus GN=Serpina3g PE=2 SV=2	SPA3G_MOUSE	Serpina3g Spi2A	60	0	146	0	0	0	0	0	0	0	0	0	0	0	0	0	144	85	0	0	0	0	116	0	0.0297116	0	1.11165	100.218	0.994	#DIV/0!	18.0743	0.429
Q9JM99	Isoform E of Proteoglycan 4 OS=Mus musculus GN=Prg4	PRG4_MOUSE	Prg4 Msf Szp	8	10	10	1	2	1	5	8	10	1	2	3	22	17	16	5	9	15	15	10	14	6	6	14	27.7302	2.756	2.625	15.0184	2.592	2.24138	43.5407	3.536
P11589	Major urinary protein 2 OS=Mus musculus GN=Mup2 PE=1 SV=1	MUP2_MOUSE	Mup2	11	7	14	29	55	41	5	25	24	55	27	22	2	0	6	31	33	25	0	2	7	26	20	12	13.1896	-0.965	0.617834	27.1592	-1.81	0.424051	37.9224	-1.801
P18419	Seminal vesicle secretory protein 4 OS=Mus musculus GN=Svs4 PE=1 SV=2	SVS4_MOUSE	Svs4 Svp2	0	0	0	0	0	0	0	0	0	0	0	0	0	0	0	0	11	0	0	0	0	0	20	1	4.78242	0.933	#DIV/0!	13.426	1.02	#DIV/0!	19.2628	1.405
P01633	Ig kappa chain V19-17 OS=Mus musculus GN=Igk-V19-17 PE=1 SV=1	KV5A1_MOUSE	Igk-V19-17	0	0	0	1	0	0	0	0	0	0	0	0	2	5	1	4	4	0	3	8	3	3	3	0	10.7492	2.546	16	11.9235	3.135	#DIV/0!	23.9588	4.244
Q80X76	Serine protease inhibitor A3F OS=Mus musculus GN=Serpina3f PE=1 SV=3	SPA3F_MOUSE	Serpina3f	0	0	0	0	0	0	0	0	103	0	0	0	0	0	0	0	0	0	0	29	0	0	0	0	0.166667	0	#DIV/0!	23.0729	-0.646	0.281553	21.7753	-0.646
P02089	Hemoglobin subunit beta-2 OS=Mus musculus GN=Hbb-b2 PE=1 SV=2	HBB2_MOUSE	Hbb-b2	0	0	0	0	0	0	0	0	0	33	0	0	0	0	0	0	0	0	0	0	0	0	0	0	0.166667	0	#DIV/0!	21.2596	-0.975	0	18.0555	-0.975
Q9Z1T2	Thrombospondin-4 OS=Mus musculus GN=Thbs4 PE=1 SV=1	TSP4_MOUSE	Thbs4 Tsp4	23	28	28	9	33	21	13	25	24	15	12	13	9	11	14	4	15	8	5	16	12	8	6	10	32.3693	-4.34	0.429577	8.18349	-3.741	0.558824	39.6964	-3.916
P07724	Serum albumin OS=Mus musculus GN=Alb PE=1 SV=3	ALBU_MOUSE	Alb Alb-1 Alb1	291	191	198	20	24	16	742	460	567	197	16	17	195	140	258	21	18	13	305	449	710	46	19	18	4.41308	-0.177	0.871622	31.6347	-0.344	0.773887	33.4843	-0.388
P12246	Serum amyloid P-component OS=Mus musculus GN=Apcs PE=1 SV=2	SAMP_MOUSE	Apcs Ptx2 Sap	14	17	21	6	8	12	14	20	19	3	4	7	32	24	21	8	15	27	38	21	33	6	7	27	14.9399	2.014	1.62821	26.6669	1.734	1.97015	40.3999	2.642
P08607	C4b-binding protein OS=Mus musculus GN=C4bpa PE=1 SV=3	C4BPA_MOUSE	C4bpa C4bp	54	61	56	45	67	65	33	37	37	29	26	33	71	9	62	69	124	104	42	32	41	59	59	57	11.6104	1.05	1.26149	22.392	3.013	1.48718	30.5758	1.45
P01749	Ig heavy chain V region 3 OS=Mus musculus GN=Ighv1-61 PE=1 SV=1	HVM05_MOUSE	Ighv1-61 Igh-VJ558	2	0	0	0	0	0	0	0	0	0	0	0	0	2	0	6	0	0	2	2	12	7	4	0	2.92235	0.884	4	17.2112	2.561	#DIV/0!	19.6251	2.448
P15947	Kallikrein-1 OS=Mus musculus GN=Klk1 PE=1 SV=3	KLK1_MOUSE	Klk1 Klk-6 Klk6	12	3	2	0	0	0	10	5	8	0	0	0	0	0	0	0	3	0	0	0	0	0	0	0	10.7709	-1.154	0.176471	13.4424	-1.775	0	25.3074	-2.059
P09470	Angiotensin-converting enzyme OS=Mus musculus GN=Ace PE=1 SV=3	ACE_MOUSE	Ace Dcp1	40	25	21	34	57	41	7	13	10	11	5	5	16	11	15	21	25	18	5	6	7	8	6	4	41.3772	-3.408	0.486239	0.932157	-1.563	0.705882	39.6053	-1.744
P18532	Ig heavy chain V region 1B43 OS=Mus musculus PE=1 SV=1	HVM61_MOUSE	0	0	0	0	0	0	0	0	0	0	0	0	0	0	0	27	0	0	0	0	0	0	0	0	0	26.552	0.98	#DIV/0!	0.166667	0	#DIV/0!	23.0356	0.979
Q2VLH6	Isoform 2 of Scavenger receptor cysteine-rich type 1 protein M130 OS=Mus musculus GN=Cd163	C163A_MOUSE	Cd163 M130	9	5	9	3	3	3	2	3	2	1	2	3	0	0	0	3	2	0	0	0	0	0	0	0	18.6082	-2.917	0.15625	6.20114	-4.607	0	26.0371	-3.195
P08071	Lactotransferrin OS=Mus musculus GN=Ltf PE=2 SV=4	TRFL_MOUSE	Ltf	38	30	35	19	19	21	29	29	26	14	18	21	51	34	38	29	38	28	40	41	41	36	30	27	10.3902	1.777	1.34568	19.4551	2.987	1.56934	28.5507	2.814
B5X0G2	Major urinary protein 1 OS=Mus musculus GN=Mup1 PE=1 SV=1	MUP17_MOUSE	Mup17 Mup15	0	7	9	37	75	54	0	14	19	44	24	22	2	1	5	35	44	28	1	0	7	26	15	9	13.7384	-0.74	0.631868	17.0001	-1.397	0.471545	29.5832	-1.187
P07310	Creatine kinase M-type OS=Mus musculus GN=Ckm PE=1 SV=1	KCRM_MOUSE	Ckm Ckmm	2	13	5	12	13	25	0	5	0	4	4	15	8	9	3	5	3	2	0	1	0	1	0	1	15.1412	-1.649	0.428571	14.2852	-1.63	0.107143	27.8867	-1.925
P02762	Major urinary protein 6 OS=Mus musculus GN=Mup6 PE=1 SV=2	MUP6_MOUSE	Mup6	14	0	0	0	0	0	8	0	0	0	0	0	0	0	0	33	39	0	0	0	0	0	0	0	36.538	1.108	5.14286	3.743	-0.923	0	24.2725	0.909
Q07456	Protein AMBP OS=Mus musculus GN=Ambp PE=2 SV=2	AMBP_MOUSE	Ambp Itil	50	74	66	50	63	52	63	104	93	84	68	84	88	41	82	67	80	92	92	104	114	89	84	107	16.7981	2.109	1.26761	14.126	2.912	1.18952	31.1024	3.54
O70570	Polymeric immunoglobulin receptor OS=Mus musculus GN=Pigr PE=1 SV=1	PIGR_MOUSE	Pigr	1	0	0	3	0	1	1	1	2	0	0	1	12	3	5	3	3	4	9	3	6	0	0	1	16.3253	2.457	6	6.88351	1.331	3.8	24.1411	2.718
P01644	Ig kappa chain V-V region NQ5-89.4 OS=Mus musculus PE=4 SV=1	KV5AB_MOUSE	0	0	0	0	0	0	1	0	0	0	0	0	0	2	0	2	10	0	0	0	0	0	10	0	3	11.2533	1.241	14	6.3394	1.233	#DIV/0!	18.8507	1.794
Q08879-2	Isoform C of Fibulin-1 OS=Mus musculus GN=Fbln1	FBLN1_MOUSE	Fbln1	32	34	33	22	38	26	23	34	28	25	18	15	23	21	27	26	33	22	0	22	0	21	0	0	2.28468	-1.835	0.821622	43.7875	-3.426	0.300699	23.8074	-1.966
Q8R121	Protein Z-dependent protease inhibitor OS=Mus musculus GN=Serpina10 PE=1 SV=1	ZPI_MOUSE	Serpina10 Zpi	43	50	53	36	47	35	35	44	52	45	30	34	80	56	47	42	61	45	50	68	69	40	40	57	11.1407	2.017	1.25379	16.0629	3.191	1.35	26.6983	2.76
O70362	Phosphatidylinositol-glycan-specific phospholipase D OS=Mus musculus GN=Gpld1 PE=1 SV=1	PHLD_MOUSE	Gpld1	102	81	118	63	81	62	140	179	205	112	80	85	74	74	72	50	82	81	89	107	100	87	87	106	4.86227	-1.063	0.854043	16.4159	-1.743	0.719101	20.0087	-2.05
P01631	Ig kappa chain V-II region 26-10 OS=Mus musculus PE=1 SV=1	KV2A7_MOUSE	0	4	8	8	4	6	3	7	8	8	6	3	6	11	6	6	12	10	15	10	12	13	13	11	21	10.0705	2.62	1.81818	14.2248	3.974	2.10526	24.7367	4.765
Q9QXD6	Fructose-1,6-bisphosphatase 1 OS=Mus musculus GN=Fbp1 PE=1 SV=3	F16P1_MOUSE	Fbp1 Fbp Fbp3	0	0	0	1	0	0	0	0	0	0	0	0	10	1	1	0	2	1	6	2	0	0	0	0	9.07825	1.357	15	4.35591	1.126	#DIV/0!	14.574	1.838
P18526	Ig heavy chain V region 345 OS=Mus musculus PE=1 SV=1	HVM55_MOUSE	0	1	0	2	2	4	0	0	1	1	0	0	0	5	5	0	4	6	4	3	8	5	4	0	0	6.908	2.447	2.66667	9.20174	2.37	10	16.3604	3.339
P01748	Ig heavy chain V region 23 OS=Mus musculus PE=4 SV=1	HVM04_MOUSE	0	0	0	0	0	0	0	0	0	0	0	0	0	0	0	0	9	0	0	0	0	0	9	0	0	7.8037	0.95	#DIV/0!	3.42978	0.919	#DIV/0!	12.2613	1.365
P15327	Bisphosphoglycerate mutase OS=Mus musculus GN=Bpgm PE=2 SV=2	PMGE_MOUSE	Bpgm	4	6	2	4	9	3	3	4	3	9	6	5	2	0	1	2	3	2	1	0	2	2	0	2	7.31191	-3.051	0.357143	9.29776	-3.198	0.233333	17.2554	-4.6
O88844	Isocitrate dehydrogenase [NADP] cytoplasmic OS=Mus musculus GN=Idh1 PE=1 SV=2	IDHC_MOUSE	Idh1	1	0	2	0	1	0	0	0	2	0	0	0	14	4	2	2	3	3	3	0	2	0	0	0	18.1684	2.007	7	0.693643	0.839	2.5	18.311	1.965
P06880	Somatotropin OS=Mus musculus GN=Gh1 PE=2 SV=1	SOMA_MOUSE	Gh1 Gh	5	0	5	0	0	0	6	0	2	0	0	0	0	0	0	0	0	0	0	0	0	0	0	0	6.64541	-1.428	0	3.23102	-1.121	0	10.9046	-1.931
P17897	Lysozyme C-1 OS=Mus musculus GN=Lyz1 PE=1 SV=1	LYZ1_MOUSE	Lyz1 Lzp-s	7	5	5	0	0	0	0	0	0	0	0	0	0	0	0	0	0	0	0	0	0	0	0	0	14.0651	-1.928	0	0.166667	0	#DIV/0!	11.4438	-1.706
P01812	Ig heavy chain V region MOPC 173 OS=Mus musculus PE=1 SV=1	HVM42_MOUSE	0	0	0	0	0	0	0	0	0	0	0	0	0	0	0	0	4	0	0	0	0	5	7	0	0	2.01314	0.895	#DIV/0!	5.18459	1.385	#DIV/0!	8.07007	1.734
P01820	Ig heavy chain V region PJ14 OS=Mus musculus PE=1 SV=1	HVM44_MOUSE	0	0	0	0	0	0	0	0	0	0	0	0	1	0	0	0	0	0	0	3	1	0	8	5	2	0.166667	0	#DIV/0!	10.3157	2.361	19	8.32323	1.902
P26041	Moesin OS=Mus musculus GN=Msn PE=1 SV=3	MOES_MOUSE	Msn	8	7	6	0	4	0	1	3	2	2	3	3	29	10	8	3	6	0	14	6	2	2	3	0	14.0901	1.179	2.24	5.01372	0.974	1.92857	19.7638	1.478
P07309	Transthyretin OS=Mus musculus GN=Ttr PE=1 SV=1	TTHY_MOUSE	Ttr	14	12	8	8	16	6	10	18	11	26	26	19	3	14	5	9	26	9	2	12	16	45	71	39	0.000409695	0	1.03125	17.1864	1.117	1.68182	11.1828	1.019
Q80W65	Proprotein convertase subtilisin/kexin type 9 OS=Mus musculus GN=Pcsk9 PE=1 SV=2	PCSK9_MOUSE	Pcsk9 Narc1	2	7	2	5	3	3	4	7	3	5	2	3	9	12	10	6	4	6	10	10	11	3	5	6	10.5655	2.542	2.13636	6.24724	2.206	1.875	17.4055	3.383
P19221	Prothrombin OS=Mus musculus GN=F2 PE=1 SV=1	THRB_MOUSE	F2 Cf2	162	226	214	154	228	161	342	541	525	507	363	343	210	265	203	174	269	220	309	587	442	453	408	406	27.0982	2.782	1.17118	3.32574	1.06	0.993895	21.9021	1.042
Q9R0G6	Cartilage oligomeric matrix protein OS=Mus musculus GN=Comp PE=1 SV=2	COMP_MOUSE	Comp	16	11	10	12	14	15	7	11	8	8	4	6	3	6	6	4	10	9	3	7	7	3	3	1	15.723	-3.698	0.487179	3.51738	-2.561	0.545455	19.4125	-2.824
Q810U4	Isoform 3 of Neuronal cell adhesion molecule OS=Mus musculus GN=Nrcam	NRCAM_MOUSE	Nrcam Kiaa0343	2	7	4	2	2	1	2	3	1	1	2	0	1	0	1	1	1	0	0	0	0	0	0	0	6.87779	-2.341	0.222222	3.28139	-2.672	0	11.1284	-2.907
P01635	Ig kappa chain V-V region K2 (Fragment) OS=Mus musculus PE=1 SV=1	KV5A3_MOUSE	0	3	2	1	3	3	1	1	4	0	2	1	0	3	1	2	5	6	9	6	2	7	6	4	4	3.79217	1.545	2	9.87213	3.28	3.625	13.2458	3.186
O54782	Epididymis-specific alpha-mannosidase OS=Mus musculus GN=Man2b2 PE=2 SV=2	MA2B2_MOUSE	Man2b2 Kiaa0935	9	7	10	2	3	3	4	4	4	1	0	1	16	17	22	1	2	1	9	15	8	1	0	1	8.68622	1.047	1.73529	7.12655	1.358	2.42857	16.0061	1.454
P13634	Carbonic anhydrase 1 OS=Mus musculus GN=Ca1 PE=2 SV=4	CAH1_MOUSE	Ca1 Car1	6	6	2	11	14	11	0	0	0	0	0	0	2	1	2	5	5	1	0	0	0	0	0	0	17.6318	-2.745	0.32	0.166667	0	#DIV/0!	16.45	-1.686
Q60696	Melanocyte protein PMEL OS=Mus musculus GN=Pmel PE=1 SV=1	PMEL_MOUSE	Pmel D10H12S53E Pmel17 Si Silv	8	7	4	4	4	3	2	2	1	0	0	0	0	0	1	2	3	1	0	0	1	0	0	0	14.3499	-3.278	0.233333	0.520367	-1.13	0.2	14.9245	-2.369
P04247	Myoglobin OS=Mus musculus GN=Mb PE=1 SV=3	MYG_MOUSE	Mb	10	15	15	9	18	18	3	10	7	7	4	7	7	8	10	6	5	2	5	6	10	1	2	2	16.0769	-3.89	0.447059	0.862101	-0.949	0.684211	15.5592	-2.274
P52480	Pyruvate kinase PKM OS=Mus musculus GN=Pkm PE=1 SV=4	KPYM_MOUSE	Pkm Pk3 Pkm2 Pykm	33	39	39	23	32	23	30	29	32	28	18	22	32	0	0	31	0	0	26	29	32	34	26	28	56.9058	-2.329	0.333333	1.69406	1.564	1.10063	19.2851	-1.67
P11672	Neutrophil gelatinase-associated lipocalin OS=Mus musculus GN=Lcn2 PE=1 SV=1	NGAL_MOUSE	Lcn2	0	0	0	0	0	0	0	0	0	0	0	0	3	0	1	0	1	5	4	0	0	0	0	0	6.36692	1.805	#DIV/0!	1.47253	0.878	#DIV/0!	8.51684	2.019
P12710	Fatty acid-binding protein, liver OS=Mus musculus GN=Fabp1 PE=1 SV=2	FABPL_MOUSE	Fabp1 Fabpl	0	0	0	0	0	0	0	0	0	0	0	0	11	0	0	0	0	0	3	0	0	0	0	0	7.77159	0.95	#DIV/0!	0.786632	0.844	#DIV/0!	8.82369	1.204
Q64374	Regucalcin OS=Mus musculus GN=Rgn PE=1 SV=1	RGN_MOUSE	Rgn Smp30	0	0	0	0	0	0	0	0	0	0	0	0	10	0	0	0	0	0	4	0	0	0	0	0	6.73958	0.946	#DIV/0!	1.47253	0.878	#DIV/0!	8.86805	1.282
Q8VCG4	Complement component C8 gamma chain OS=Mus musculus GN=C8g PE=1 SV=1	CO8G_MOUSE	C8g	29	24	25	48	61	35	21	23	38	46	39	45	24	1	14	42	50	36	11	8	7	50	37	29	8.02909	-0.921	0.752252	9.24994	-1.161	0.669811	17.3181	-1.406
Q80YX1	Isoform 5 of Tenascin OS=Mus musculus GN=Tnc	TENA_MOUSE	Tnc Hxb	10	4	14	7	12	10	2	3	2	0	1	1	3	2	3	4	8	3	0	1	0	1	0	1	14.7566	-3.763	0.403509	0.98467	-1.681	0.333333	16.2077	-2.021
P16014	Secretogranin-1 OS=Mus musculus GN=Chgb PE=1 SV=2	SCG1_MOUSE	Chgb Scg-1 Scg1	3	1	2	1	0	0	2	1	2	2	3	1	4	8	2	2	2	1	6	9	8	4	2	1	4.92262	1.52	2.71429	6.30744	2.209	2.72727	11.9759	2.739
P13595	Isoform 3 of Neural cell adhesion molecule 1 OS=Mus musculus GN=Ncam1	NCAM1_MOUSE	Ncam1 Ncam	17	14	14	14	15	13	14	20	15	9	7	9	7	9	7	8	9	7	3	11	9	11	5	7	12.1829	-4.218	0.54023	4.12954	-2.124	0.621622	16.4064	-3.52
Q62469	Integrin alpha-2 OS=Mus musculus GN=Itga2 PE=1 SV=2	ITA2_MOUSE	Itga2	8	7	1	2	5	5	3	1	2	1	1	0	2	2	1	0	0	1	0	2	1	0	0	0	13.1805	-2.629	0.214286	0.878602	-1.249	0.375	13.9941	-2.367
P40201	Chromodomain-helicase-DNA-binding protein 1 OS=Mus musculus GN=Chd1 PE=1 SV=3	CHD1_MOUSE	Chd1 Chd-1	0	1	0	0	1	0	0	1	0	1	1	0	2	5	0	6	1	1	1	3	2	2	1	2	10.0432	1.875	7.5	2.10852	3.045	3.66667	12.4093	2.567
Q61508	Extracellular matrix protein 1 OS=Mus musculus GN=Ecm1 PE=1 SV=2	ECM1_MOUSE	Ecm1	72	64	51	51	76	57	59	65	69	56	34	38	35	29	43	40	64	42	27	53	50	55	49	42	24.3828	-3.167	0.681941	1.16064	-0.936	0.859813	20.1655	-2.316
Q8R016	Bleomycin hydrolase OS=Mus musculus GN=Blmh PE=1 SV=1	BLMH_MOUSE	Blmh	9	11	9	4	6	5	2	4	6	2	1	1	5	1	3	3	5	2	0	1	1	0	2	0	9.70638	-2.987	0.431818	3.1142	-2.213	0.25	13.5323	-2.316
P01630	Ig kappa chain V-II region 7S34.1 OS=Mus musculus PE=1 SV=1	KV2A6_MOUSE	0	0	0	0	0	0	0	0	0	0	0	0	0	0	3	1	2	3	2	0	0	0	0	2	0	7.56113	3.239	#DIV/0!	0.0937667	0.727	#DIV/0!	7.13487	2.633
P70663	SPARC-like protein 1 OS=Mus musculus GN=Sparcl1 PE=2 SV=3	SPRL1_MOUSE	Sparcl1 Ecm2 Sc1	25	27	26	15	24	19	18	21	23	11	6	10	9	7	18	16	25	20	4	8	11	9	10	7	7.28636	-2.128	0.698529	7.21379	-2.338	0.550562	14.3639	-1.91
P01750	Ig heavy chain V region VH558 B4 OS=Mus musculus PE=1 SV=1	HVM06_MOUSE	0	2	1	0	0	1	0	0	1	0	0	1	0	3	2	2	0	5	3	0	1	2	0	4	5	4.28741	2.244	3.75	3.49348	1.608	6	8.61093	2.817
P62737	Actin, aortic smooth muscle OS=Mus musculus GN=Acta2 PE=1 SV=1	ACTA_MOUSE	Acta2 Actsa Actvs	40	39	52	13	18	14	77	70	0	55	0	54	0	0	50	23	0	0	58	69	0	62	51	0	36.9404	-1.349	0.414773	0.000369946	0	0.9375	14.7799	-0.797
P11087	Isoform 2 of Collagen alpha-1(I) chain OS=Mus musculus GN=Col1a1	CO1A1_MOUSE	Col1a1 Cola1	14	14	13	15	15	12	8	12	10	7	7	4	11	5	10	6	9	8	7	3	5	4	3	2	9.06223	-3.551	0.590361	3.77293	-2.119	0.5	13.3097	-2.338
P11276	Fibronectin OS=Mus musculus GN=Fn1 PE=1 SV=4	FINC_MOUSE	Fn1	445	509	491	396	596	447	493	851	737	636	512	538	388	244	479	389	604	619	411	843	810	651	601	726	2.04443	-0.332	0.944175	26.0855	2.369	1.073	7.00345	0.77
P06879	Prolactin OS=Mus musculus GN=Prl PE=2 SV=1	PRL_MOUSE	Prl	0	2	2	0	0	0	4	1	0	0	0	0	3	8	1	0	0	0	4	10	6	0	0	0	3.76854	0.988	3	4.88461	1.284	4	9.46272	1.699
P01660	Ig kappa chain V-III region PC 3741/TEPC 111 OS=Mus musculus PE=1 SV=1	KV3A8_MOUSE	0	0	0	6	0	0	0	0	0	0	0	0	0	0	0	0	0	0	0	6	0	6	7	3	4	2.167	-0.899	0	18.5492	3.467	#DIV/0!	7.38612	1.542
P01803	Ig heavy chain V region AMPC1 OS=Mus musculus PE=1 SV=1	HVM34_MOUSE	0	0	0	0	0	0	0	0	0	0	0	0	0	0	0	0	0	6	0	0	0	0	0	6	0	1.61452	0.884	#DIV/0!	1.80839	0.889	#DIV/0!	4.23918	1.353
P01897	H-2 class I histocompatibility antigen, L-D alpha chain OS=Mus musculus GN=H2-L PE=1 SV=2	HA1L_MOUSE	H2-L	0	0	0	0	0	0	0	0	0	0	0	0	0	0	0	0	0	0	0	0	12	0	0	0	0.166667	0	#DIV/0!	4.74376	0.932	#DIV/0!	3.42625	0.534
Q9R1E6	Isoform 3 of Ectonucleotide pyrophosphatase/phosphodiesterase family member 2 OS=Mus musculus GN=Enpp2	ENPP2_MOUSE	Enpp2 Npps2 Pdnp2	12	14	13	17	23	20	3	9	5	6	4	8	7	7	14	7	13	10	3	4	2	5	4	1	10.8732	-3.156	0.585859	2.41396	-1.942	0.542857	13.7275	-1.742
Q08879	Fibulin-1 OS=Mus musculus GN=Fbln1 PE=1 SV=2	FBLN1_MOUSE	Fbln1	35	41	40	30	45	33	30	46	32	31	24	21	24	21	27	26	38	26	18	26	23	26	21	21	9.33314	-4.972	0.723214	3.69279	-2.522	0.733696	13.1367	-2.427
P06683	Complement component C9 OS=Mus musculus GN=C9 PE=1 SV=2	CO9_MOUSE	C9	68	78	77	77	115	85	95	116	153	224	205	171	89	55	63	79	108	82	107	77	100	186	138	134	0.0995337	-0.224	0.952	15.8828	-1.004	0.76971	10.5399	-0.929
Q64442	Sorbitol dehydrogenase OS=Mus musculus GN=Sord PE=1 SV=3	DHSO_MOUSE	Sord Sdh1	6	5	6	2	10	1	2	2	4	1	1	0	12	9	6	5	11	5	4	10	4	3	4	3	5.28494	2.067	1.6	6.57576	2.788	2.8	11.6084	2.355
P00920	Carbonic anhydrase 2 OS=Mus musculus GN=Ca2 PE=1 SV=4	CAH2_MOUSE	Ca2 Car2	23	30	27	19	32	17	8	20	9	9	9	7	20	21	19	16	20	11	1	9	9	2	6	2	5.08612	-2.358	0.722973	8.43027	-2.627	0.467742	11.5257	-1.325
P11590	Major urinary protein 4 OS=Mus musculus GN=Mup4 PE=1 SV=1	MUP4_MOUSE	Mup4	0	0	0	4	6	11	0	0	0	0	0	2	0	0	0	20	12	8	0	0	0	9	1	2	7.12997	0.783	1.90476	3.17053	1.02	6	10.7565	0.985
P32261	Antithrombin-III OS=Mus musculus GN=Serpinc1 PE=1 SV=1	ANT3_MOUSE	Serpinc1 At3	222	265	334	164	342	186	467	654	650	526	403	357	286	268	280	182	368	282	358	644	581	445	495	498	16.9173	1.921	1.10112	3.3299	0.896	0.988224	16.3216	0.95
Q91Y97	Fructose-bisphosphate aldolase B OS=Mus musculus GN=Aldob PE=1 SV=3	ALDOB_MOUSE	Aldob Aldo2	5	8	8	11	8	5	7	11	8	7	8	9	12	19	8	11	12	8	15	13	11	10	12	12	6.63591	1.874	1.55556	5.08469	2.446	1.46	12.1439	2.922
P59383	Leucine-rich repeat neuronal protein 4 OS=Mus musculus GN=Lrrn4 PE=1 SV=2	LRRN4_MOUSE	Lrrn4	5	7	4	5	6	4	6	6	6	6	4	4	2	0	1	3	4	6	0	1	2	4	2	3	4.44626	-2.249	0.516129	5.87764	-3.78	0.375	10.7284	-3.787
P70375	Coagulation factor VII OS=Mus musculus GN=F7 PE=2 SV=1	FA7_MOUSE	F7 Cf7	20	22	25	12	39	21	23	30	29	20	15	24	29	38	29	15	28	25	21	67	37	19	19	24	4.37539	1.463	1.17986	6.40217	1.287	1.32624	10.8127	1.923
Q6DFX2	Anthrax toxin receptor 2 OS=Mus musculus GN=Antxr2 PE=2 SV=1	ANTR2_MOUSE	Antxr2	6	7	6	7	12	10	2	4	4	0	1	0	2	3	4	2	4	5	0	3	0	1	1	1	10.9927	-4.519	0.416667	0.34249	-0.795	0.545455	11.1382	-2.031
Q9WUU7	Cathepsin Z OS=Mus musculus GN=Ctsz PE=2 SV=1	CATZ_MOUSE	Ctsz	13	12	15	5	8	10	10	8	9	9	9	4	22	25	23	10	12	9	9	13	10	12	10	6	11.7553	1.88	1.60317	1.19693	1.451	1.22449	12.1163	1.783
Q01149	Collagen alpha-2(I) chain OS=Mus musculus GN=Col1a2 PE=2 SV=2	CO1A2_MOUSE	Col1a2 Cola2	7	7	8	8	8	9	13	9	6	1	1	2	0	6	5	6	4	2	2	4	3	5	1	2	7.26576	-2.637	0.489362	2.77201	-0.983	0.53125	10.5104	-2.182
P06909	Complement factor H OS=Mus musculus GN=Cfh PE=1 SV=2	CFAH_MOUSE	Cfh Hf1	478	551	626	418	589	474	711	1032	954	894	666	668	595	183	525	459	647	645	684	863	896	913	803	884	0.0022579	0	0.973852	18.9823	2.056	1.02396	10.1976	0.662
O09131	Glutathione S-transferase omega-1 OS=Mus musculus GN=Gsto1 PE=2 SV=2	GSTO1_MOUSE	Gsto1 Gstx Gtsttl	7	11	12	6	11	12	6	8	9	8	1	14	13	5	16	12	20	11	12	5	17	18	10	13	2.92659	1.661	1.30508	7.22836	1.92	1.63043	9.61156	2.38
O08689	Growth/differentiation factor 8 OS=Mus musculus GN=Mstn PE=1 SV=1	GDF8_MOUSE	Mstn Gdf8	11	8	4	6	6	6	3	2	3	0	0	0	3	1	3	5	5	2	0	1	0	0	0	0	8.35139	-2.342	0.463415	1.7499	-1.446	0.125	10.7642	-1.738
P30933	Seminal vesicle secretory protein 5 OS=Mus musculus GN=Svs5 PE=2 SV=1	SVS5_MOUSE	Svs5 Svp5	0	0	0	0	0	0	0	0	0	0	0	0	0	0	0	0	4	0	0	0	0	0	6	0	0.662353	0.835	#DIV/0!	1.80839	0.889	#DIV/0!	3.10015	1.296
P28798	Granulins OS=Mus musculus GN=Grn PE=1 SV=2	GRN_MOUSE	Grn	24	20	20	16	14	13	2	2	3	0	0	0	12	5	14	9	12	14	0	1	0	0	0	0	10.5772	-2.366	0.616822	1.16987	-1.419	0.142857	12.1275	-1.106
P07743	BPI fold-containing family A member 2 OS=Mus musculus GN=Bpifa2 PE=2 SV=1	BPIA2_MOUSE	Bpifa2 Psp	1	2	0	1	2	1	0	3	0	0	0	0	0	0	0	0	0	0	0	0	0	0	0	0	3.50546	-3.179	0	0.154375	-0.752	0	3.76464	-2.594
Q9QUN9	Dickkopf-related protein 3 OS=Mus musculus GN=Dkk3 PE=2 SV=1	DKK3_MOUSE	Dkk3	7	8	5	8	7	7	0	2	0	0	0	0	2	0	5	4	3	4	0	0	0	0	0	0	9.35868	-3.178	0.428571	0.0230152	-0.669	0	9.46153	-1.587
P97798	Isoform 5 of Neogenin OS=Mus musculus GN=Neo1	NEO1_MOUSE	Neo1 Ngn	6	3	3	2	1	4	1	3	2	0	0	4	1	0	1	2	0	0	0	4	1	0	0	0	8.18767	-2.417	0.210526	0.697609	-0.837	0.5	8.64651	-2.309
P11588	Major urinary protein 1 OS=Mus musculus GN=Mup1 PE=1 SV=1	MUP1_MOUSE	Mup1	0	0	0	0	57	43	0	0	0	49	28	25	0	0	0	32	36	21	0	0	0	28	21	0	0.00302459	0	0.89	16.371	-0.934	0.480392	6.55115	-0.518
P27931	Interleukin-1 receptor type 2 OS=Mus musculus GN=Il1r2 PE=1 SV=1	IL1R2_MOUSE	Il1r2 Il-1r2 Il1rb	8	8	7	14	15	7	1	4	2	1	1	2	3	0	4	9	8	6	0	3	2	0	1	0	9.1976	-2	0.508475	0.51018	-1.109	0.545455	9.97383	-1.421
Q61730	Isoform 2 of Interleukin-1 receptor accessory protein OS=Mus musculus GN=Il1rap	IL1AP_MOUSE	Il1rap	61	67	60	41	68	42	59	84	70	79	73	72	39	39	35	63	66	67	24	47	39	76	64	71	0.468461	-0.349	0.911504	11.6033	-1.856	0.734554	8.16964	-1.459
Q9CPY7	Isoform 2 of Cytosol aminopeptidase OS=Mus musculus GN=Lap3	AMPL_MOUSE	Lap3 Lapep	39	31	36	11	24	15	17	17	27	11	14	10	30	20	19	12	26	11	9	16	10	9	10	7	5.00367	-1.018	0.75641	4.36707	-2.175	0.635417	9.39959	-1.201
P97321	Isoform 3 of Seprase OS=Mus musculus GN=Fap	SEPR_MOUSE	Fap	12	4	1	2	5	9	2	4	1	2	2	1	4	2	3	0	2	1	3	1	0	2	0	1	10.5122	-1.68	0.363636	0.172646	-0.647	0.583333	9.47998	-1.617
P01636	Ig kappa chain V-V region MOPC 149 OS=Mus musculus PE=1 SV=1	KV5A4_MOUSE	0	0	1	0	0	1	0	0	4	0	1	1	0	5	0	0	2	1	4	2	2	2	1	3	3	5.90078	1.775	6	1.83386	1.862	2.16667	7.96247	2.622
O35930	Platelet glycoprotein Ib alpha chain OS=Mus musculus GN=Gp1ba PE=2 SV=2	GP1BA_MOUSE	Gp1ba	32	23	24	31	31	24	25	26	23	15	12	16	34	30	22	31	42	30	18	25	28	34	26	22	1.87519	1.064	1.14545	5.62766	2.365	1.30769	6.57781	1.377
Q7M747	Secretoglobin family 2B member 24 OS=Mus musculus GN=Scgb2b24 PE=2 SV=1	S2B24_MOUSE	Scgb2b24 Abpz	1	1	0	0	0	6	1	1	3	0	0	8	2	0	0	6	5	2	4	0	2	15	5	3	1.5066	0.712	1.875	4.63033	1.083	2.23077	6.4647	1.352
Q8CFX1	GDH/6PGL endoplasmic bifunctional protein OS=Mus musculus GN=H6pd PE=1 SV=2	G6PE_MOUSE	H6pd	13	9	10	4	14	10	1	2	1	3	0	0	21	9	12	8	13	13	7	10	3	2	2	2	2.60413	1.286	1.26667	8.77962	2.062	3.71429	7.78689	1.225
Q61838	Alpha-2-macroglobulin OS=Mus musculus GN=A2m PE=1 SV=3	A2M_MOUSE	A2m Pzp	1738	2528	3001	1957	3358	2226	1686	2706	2699	1886	1772	1807	2190	2349	2467	1885	3409	2237	1226	2389	2476	1968	2052	2121	3.13343	0	0.981699	4.42564	0.623	0.974196	7.29485	0
P43025	Tetranectin OS=Mus musculus GN=Clec3b PE=1 SV=2	TETN_MOUSE	Clec3b Tna	16	18	15	7	10	8	35	43	33	22	20	21	10	15	11	8	11	8	12	25	23	19	18	18	0.510394	-0.602	0.851351	7.77207	-2.48	0.66092	7.11785	-1.768
P47739	Aldehyde dehydrogenase, dimeric NADP-preferring OS=Mus musculus GN=Aldh3a1 PE=2 SV=2	AL3A1_MOUSE	Aldh3a1 Ahd-4 Ahd4 Aldh3 Aldh4	4	4	5	2	1	8	3	1	4	1	0	3	4	1	9	15	6	4	4	0	8	8	3	1	4.62347	1.009	1.625	2.98057	1.366	2	8.06035	1.393
P01756	Ig heavy chain V region J558 OS=Mus musculus PE=1 SV=1	HVM12_MOUSE	0	0	0	0	0	0	0	0	3	0	0	3	4	0	0	0	0	0	0	0	11	0	16	0	0	0.166667	0	#DIV/0!	4.23944	0.84	2.7	3.65763	0.791
Q6UGQ3	Secretoglobin family 2B member 2 OS=Mus musculus GN=Scgb2b2 PE=2 SV=1	SG2B2_MOUSE	Scgb2b2 Abpe	0	0	0	0	0	2	1	1	1	1	0	6	0	0	0	1	1	1	2	1	3	13	6	2	0.00038901	0	1.5	5.13666	1.305	2.7	4.56001	1.216
P35441	Thrombospondin-1 OS=Mus musculus GN=Thbs1 PE=1 SV=1	TSP1_MOUSE	Thbs1 Tsp1	3	17	9	19	3	7	1	5	3	3	2	1	7	1	5	10	1	2	2	1	5	2	3	1	11.5604	-1.347	0.448276	0.00486998	0.136	0.933333	8.72311	-1.114
P18525	Ig heavy chain V region 5-84 OS=Mus musculus PE=1 SV=1	HVM54_MOUSE	0	0	0	0	1	2	0	0	0	0	0	0	0	0	0	3	0	2	3	0	0	4	0	0	3	1.25738	1.053	2.66667	2.05922	1.33	#DIV/0!	3.8303	1.759
P29533	Vascular cell adhesion protein 1 OS=Mus musculus GN=Vcam1 PE=1 SV=1	VCAM1_MOUSE	Vcam1 Vcam-1	42	30	30	27	30	28	27	43	39	31	23	31	50	40	35	26	38	25	42	39	50	36	32	29	2.34944	0.884	1.14439	5.35839	1.811	1.17526	7.39	1.641
P50396	Isoform 2 of Rab GDP dissociation inhibitor beta OS=Mus musculus GN=Gdi2	GDIA_MOUSE	Gdi1 Rabgdia	0	0	0	0	0	0	0	0	0	0	0	0	3	1	3	0	0	0	1	0	0	0	0	0	3.94132	1.689	#DIV/0!	0.00913921	0.643	#DIV/0!	3.57697	1.763
O55111	Desmoglein-2 OS=Mus musculus GN=Dsg2 PE=1 SV=3	DSG2_MOUSE	Dsg2	26	16	18	14	10	12	21	14	16	5	6	6	14	14	11	10	8	7	8	9	14	8	6	2	6.46798	-1.476	0.666667	2.14656	-0.877	0.691176	8.84433	-1.487
P04939	Major urinary protein 3 OS=Mus musculus GN=Mup3 PE=1 SV=1	MUP3_MOUSE	Mup3	11	13	12	20	33	34	3	4	2	9	11	10	8	4	5	20	19	16	2	3	2	11	11	9	12.6746	-1.495	0.585366	6.0955e-06	-0.07	0.974359	9.90914	-1.085
P01843	Ig lambda-1 chain C region OS=Mus musculus PE=1 SV=1	LAC1_MOUSE	0	7	5	7	5	17	6	3	2	1	4	7	3	7	10	3	8	16	16	4	3	4	9	6	13	2.18845	1.125	1.2766	4.54241	1.632	1.95	6.25399	1.529
Q91WP0-2	Isoform 2 of Mannan-binding lectin serine protease 2 OS=Mus musculus GN=Masp2	MASP2_MOUSE	Masp2	0	14	14	0	0	0	7	11	11	9	0	8	12	14	15	0	0	15	0	12	8	12	9	10	13.4778	1.299	2	0.2468	0.441	1.1087	9.67442	1.397
P01863	Ig gamma-2A chain C region, membrane-bound form OS=Mus musculus GN=Igh-1a PE=1 SV=3	GCAA_MOUSE	Ighg	5	2	3	0	0	0	0	0	1	0	0	0	1	0	0	0	0	0	0	0	0	0	0	0	5.07004	-1.472	0.1	0.013572	-0.5	0	4.31382	-1.449
Q9Z1R3	Apolipoprotein M OS=Mus musculus GN=Apom PE=1 SV=1	APOM_MOUSE	Apom Ng20	36	58	59	24	38	25	77	99	94	81	55	54	32	42	37	41	55	36	41	95	53	56	46	40	0.409016	0	1.0125	12.5399	-2.264	0.719565	4.71425	-1.172
P46412	Glutathione peroxidase 3 OS=Mus musculus GN=Gpx3 PE=2 SV=2	GPX3_MOUSE	Gpx3	81	87	86	53	81	48	53	60	75	44	48	50	58	67	66	62	91	68	20	45	39	46	39	32	0.157555	-0.274	0.944954	14.8219	-3.956	0.669697	6.55047	-0.823
Q91ZX7	Prolow-density lipoprotein receptor-related protein 1 OS=Mus musculus GN=Lrp1 PE=1 SV=1	LRP1_MOUSE	Lrp1 A2mr	59	50	54	35	51	46	15	15	18	6	10	12	47	39	26	30	39	27	14	17	22	6	9	11	14.547	-2.363	0.705085	0.229136	0.429	1.03947	10.0867	-0.814
P21550	Beta-enolase OS=Mus musculus GN=Eno3 PE=1 SV=3	ENOB_MOUSE	Eno3 Eno-3	0	13	6	2	2	5	0	3	4	0	1	7	6	2	4	1	0	1	0	3	3	0	0	0	3.09393	-0.94	0.5	2.12988	-1.042	0.4	5.68545	-1.28
P14106	Complement C1q subcomponent subunit B OS=Mus musculus GN=C1qb PE=1 SV=2	C1QB_MOUSE	C1qb	8	8	11	3	7	4	29	54	44	41	24	35	10	16	10	5	12	10	40	53	42	44	41	35	5.73693	2.055	1.53659	3.99017	2.042	1.12335	8.63946	1.01
Q3SXB8	Isoform 2 of Collectin-11 OS=Mus musculus GN=Colec11	COL11_MOUSE	Colec11	10	9	7	5	9	8	10	14	12	7	9	7	16	18	9	8	15	9	13	13	12	12	9	9	6.84621	2.276	1.5625	1.19771	1.42	1.15254	7.51818	2.555
P01674	Ig kappa chain V-III region PC 2154 OS=Mus musculus PE=1 SV=1	KV3AM_MOUSE	0	1	1	0	0	0	0	0	0	0	0	0	0	0	0	0	4	4	0	0	0	0	4	0	0	1.96667	0.974	4	0.664236	0.834	#DIV/0!	3.25567	1.315
Q08481	Isoform 4 of Platelet endothelial cell adhesion molecule OS=Mus musculus GN=Pecam1	PECA1_MOUSE	Pecam1 Pecam Pecam-1	8	5	8	4	6	3	2	3	1	1	3	0	1	3	6	2	2	1	0	1	2	3	0	0	6.29403	-2.271	0.441176	0.361371	-0.815	0.6	6.7288	-1.744
Q9R097	Kunitz-type protease inhibitor 1 OS=Mus musculus GN=Spint1 PE=1 SV=2	SPIT1_MOUSE	Spint1 Hai1	4	4	2	4	4	1	3	5	1	1	1	2	1	3	0	2	1	2	0	0	1	2	1	0	2.63267	-1.767	0.473684	2.15815	-1.835	0.307692	5.30986	-2.29
P17742	Peptidyl-prolyl cis-trans isomerase A OS=Mus musculus GN=Ppia PE=1 SV=2	PPIA_MOUSE	Ppia	13	12	8	18	10	10	15	16	20	13	10	13	9	6	6	10	9	10	11	11	16	7	7	7	4.03245	-1.415	0.704225	2.73121	-1.905	0.678161	7.0434	-2.267
O89026	Roundabout homolog 1 OS=Mus musculus GN=Robo1 PE=1 SV=1	ROBO1_MOUSE	Robo1 Dutt1	2	2	1	0	0	0	0	1	0	0	0	0	5	3	0	3	3	2	0	1	1	0	0	1	4.81894	2.027	3.2	0.0692684	0.887	3	4.89209	1.774
Q6GU68	Immunoglobulin superfamily containing leucine-rich repeat protein OS=Mus musculus GN=Islr PE=1 SV=1	ISLR_MOUSE	Islr	1	11	7	3	7	5	5	4	3	2	2	1	3	4	2	4	5	3	1	1	1	2	0	0	1.89646	-1.24	0.617647	3.31275	-2.175	0.294118	4.95682	-1.61
P03987	Isoform 2 of Ig gamma-3 chain C region OS=Mus musculus	IGHG3_MOUSE	0	3	1	1	1	0	1	1	0	0	0	0	0	1	4	2	0	0	5	0	5	2	0	1	2	0.767407	0.742	1.71429	2.5497	1.635	10	3.21765	1.462
P08113	Endoplasmin OS=Mus musculus GN=Hsp90b1 PE=1 SV=2	ENPL_MOUSE	Hsp90b1 Grp94 Tra-1 Tra1	6	9	6	3	8	8	6	4	4	4	2	4	14	10	14	5	9	8	5	5	18	2	1	2	5.08634	2.039	1.5	0.863962	0.585	1.375	6.06847	1.472
O09173	Homogentisate 1,2-dioxygenase OS=Mus musculus GN=Hgd PE=1 SV=2	HGD_MOUSE	Hgd Aku Hgo	0	0	0	0	0	0	0	0	0	0	0	0	4	2	0	0	1	0	0	0	0	0	0	0	3.67616	1.503	#DIV/0!	0.166667	0	#DIV/0!	2.58605	1.397
P01643	Ig kappa chain V-V region MOPC 173 OS=Mus musculus PE=1 SV=1	KV5AA_MOUSE	0	0	0	0	0	0	0	0	0	0	0	0	0	1	3	0	0	3	0	0	0	0	0	0	0	3.24441	1.638	#DIV/0!	0.166667	0	#DIV/0!	2.25407	1.489
P14429	H-2 class I histocompatibility antigen, Q7 alpha chain OS=Mus musculus GN=H2-Q7 PE=1 SV=1	HA17_MOUSE	H2-Q7	0	0	0	0	0	0	0	0	0	0	0	0	2	0	3	0	0	0	2	0	0	0	0	0	2.1527	1.304	#DIV/0!	0.269578	0.783	#DIV/0!	2.81579	1.619
P18527	Ig heavy chain V region 914 OS=Mus musculus PE=1 SV=1	HVM56_MOUSE	0	0	0	0	0	0	0	0	0	0	0	0	0	0	2	2	0	3	0	0	0	0	0	0	0	3.2378	1.859	#DIV/0!	0.166667	0	#DIV/0!	2.24902	1.629
P01634	Ig kappa chain V-V region MOPC 21 OS=Mus musculus PE=1 SV=1	KV5A2_MOUSE	0	0	0	0	0	0	0	0	0	0	0	0	0	0	0	1	0	2	1	0	1	0	0	1	1	0.983308	1.59	#DIV/0!	0.309323	1.399	#DIV/0!	1.78683	2.341
P01670	Ig kappa chain V-III region PC 2485/PC 4039 OS=Mus musculus PE=1 SV=1	KV3AI_MOUSE	0	0	0	0	0	0	0	0	0	0	0	0	0	0	0	0	0	2	1	0	0	0	0	1	3	0.416109	1.127	#DIV/0!	0.747458	1.076	#DIV/0!	1.69566	1.704
P14426	H-2 class I histocompatibility antigen, D-K alpha chain OS=Mus musculus GN=H2-D1 PE=1 SV=1	HA13_MOUSE	H2-D1	0	0	0	0	0	0	0	0	0	0	0	0	0	0	0	0	0	0	0	3	4	0	0	0	0.166667	0	#DIV/0!	1.79497	1.3	#DIV/0!	1.18145	1.236
Q6ZWY8	Thymosin beta-10 OS=Mus musculus GN=Tmsb10 PE=2 SV=3	TYB10_MOUSE	Tmsb10 Ptmb10	6	3	13	1	2	1	5	2	6	1	1	1	5	3	3	0	2	0	0	0	2	2	0	3	3.30127	-0.995	0.5	1.64275	-1.207	0.4375	5.46632	-1.385
P26618	Isoform 2 of Platelet-derived growth factor receptor alpha OS=Mus musculus GN=Pdgfra	PGFRA_MOUSE	Pdgfra	10	8	8	2	5	5	6	6	3	5	7	6	4	5	3	5	3	3	1	1	0	5	8	3	2.75023	-1.422	0.605263	2.7523	-1.487	0.545455	5.86225	-1.993
P40142	Transketolase OS=Mus musculus GN=Tkt PE=1 SV=1	TKT_MOUSE	Tkt	10	17	13	8	11	10	8	11	16	8	4	11	22	17	23	14	12	8	10	16	21	8	6	7	6.69977	1.749	1.3913	1.06754	0.896	1.17241	7.52684	1.612
Q91V98	Endosialin OS=Mus musculus GN=Cd248 PE=2 SV=1	CD248_MOUSE	Cd248 Tem1	0	4	4	1	0	1	4	7	3	4	2	3	3	2	1	1	1	0	1	1	2	1	0	1	0.00751817	-0.226	0.8	5.52129	-3.666	0.26087	3.64415	-2.06
Q61316	Heat shock 70 kDa protein 4 OS=Mus musculus GN=Hspa4 PE=1 SV=1	HSP74_MOUSE	Hspa4 Apg2 Hsp110	9	9	16	6	5	7	7	9	9	4	2	1	6	9	8	4	3	1	4	4	7	3	1	1	4.19214	-1.504	0.596154	0.970218	-0.915	0.625	5.39934	-1.492
P48356	Isoform E of Leptin receptor OS=Mus musculus GN=Lepr	LEPR_MOUSE	Lepr Db Obr	2	4	2	1	1	0	0	0	0	0	0	0	1	0	0	0	0	0	0	0	0	0	0	0	4.64074	-2.205	0.1	0.166667	0	#DIV/0!	3.51463	-1.76
P27046	Alpha-mannosidase 2 OS=Mus musculus GN=Man2a1 PE=1 SV=2	MA2A1_MOUSE	Man2a1 Mana2	5	3	2	5	3	3	1	0	0	0	0	0	10	4	4	10	4	4	2	2	1	0	0	0	4.38672	1.454	1.71429	0.678201	1.111	5	5.55451	1.19
P04946	Ig kappa chain V-V region NQ5-89.4 OS=Mus musculus PE=4 SV=1	KV5AM_MOUSE	0	1	0	1	0	1	0	0	1	3	1	1	0	0	2	0	0	5	5	3	2	2	0	4	0	3.29937	1.334	4	1.18922	1.153	1.83333	4.89256	1.885
Q7TSK7	ADAMTS-like protein 2 OS=Mus musculus GN=Adamtsl2 PE=2 SV=1	ATL2_MOUSE	Adamtsl2 Kiaa0605 Tcp1	1	2	0	1	0	1	1	0	1	1	1	0	4	3	0	0	1	1	5	3	4	1	1	0	0.516415	0.723	1.8	3.55587	1.577	3.5	3.96559	1.748
B2RXS4	Plexin-B2 OS=Mus musculus GN=Plxnb2 PE=1 SV=1	PLXB2_MOUSE	Plxnb2	8	5	4	3	4	3	3	0	0	1	1	2	2	2	3	3	1	1	0	1	0	0	1	1	4.76086	-2.021	0.444444	0.698174	-1.103	0.428571	5.94035	-1.726
P11835	Integrin beta-2 OS=Mus musculus GN=Itgb2 PE=1 SV=2	ITB2_MOUSE	Itgb2	9	3	3	3	4	4	2	3	2	1	0	0	0	2	3	2	1	1	0	3	2	1	0	0	7.52491	-2.024	0.346154	0.0213866	-0.394	0.75	6.52506	-1.687
Q8BRK9	Alpha-mannosidase 2x OS=Mus musculus GN=Man2a2 PE=2 SV=2	MA2A2_MOUSE	Man2a2 Mana2x	6	4	2	2	4	5	0	0	0	0	0	0	0	1	0	2	5	0	0	0	0	0	0	0	7.39102	-2.359	0.347826	0.166667	0	#DIV/0!	6.46308	-1.589
P10493	Nidogen-1 OS=Mus musculus GN=Nid1 PE=1 SV=2	NID1_MOUSE	Nid1 Ent	6	7	3	9	7	6	2	4	4	4	1	1	23	11	5	7	5	5	4	6	4	3	3	4	4.03606	0.983	1.47368	1.55628	2.156	1.5	5.96757	1.124
O70456	14-3-3 protein sigma OS=Mus musculus GN=Sfn PE=1 SV=2	1433S_MOUSE	Sfn Mkrn3	6	2	4	0	1	1	2	0	0	0	0	0	1	0	1	0	0	1	0	0	1	0	0	0	5.47711	-1.584	0.214286	0.00883527	-0.437	0.5	5.01136	-1.518
Q925B0	Isoform 2 of PRKC apoptosis WT1 regulator protein OS=Mus musculus GN=Pawr	PAWR_MOUSE	Pawr Par4	0	1	0	3	2	1	0	0	0	0	0	0	0	0	0	0	0	0	0	0	0	0	0	0	3.79199	-1.84	0	0.166667	0	#DIV/0!	2.67592	-1.623
Q6P253-2	Isoform 2 of Dermokine OS=Mus musculus GN=Dmkn	DMKN_MOUSE	Dmkn	0	0	0	0	0	0	5	0	0	2	0	0	0	0	0	0	0	0	0	0	0	0	0	0	0.166667	0	#DIV/0!	2.68891	-1.18	0	1.83468	-1.144
P97821	Dipeptidyl peptidase 1 OS=Mus musculus GN=Ctsc PE=2 SV=1	CATC_MOUSE	Ctsc	3	4	6	2	2	3	0	1	0	0	0	0	9	5	9	2	3	2	3	5	1	0	0	0	2.30339	1.169	1.5	3.03107	1.435	9	4.9967	1.304
P26928	Hepatocyte growth factor-like protein OS=Mus musculus GN=Mst1 PE=2 SV=2	HGFL_MOUSE	Mst1 Hgfl	54	43	38	30	57	34	39	38	41	28	23	26	33	25	25	22	41	33	28	26	36	27	34	33	14.0165	-2.596	0.699219	0.00324115	0.096	0.94359	7.96987	-1.519
P21765	Epididymal secretory glutathione peroxidase OS=Mus musculus GN=Gpx5 PE=2 SV=3	GPX5_MOUSE	Gpx5	0	0	0	15	21	16	0	0	0	10	13	10	0	0	0	10	13	10	0	0	0	8	8	4	4.15198	-0.669	0.634615	2.59722	-0.743	0.606061	7.15788	-0.95
Q8CAY6	Acetyl-CoA acetyltransferase, cytosolic OS=Mus musculus GN=Acat2 PE=1 SV=2	THIC_MOUSE	Acat2	0	1	0	1	0	0	0	0	0	0	0	0	4	3	0	0	0	0	3	0	1	0	0	0	1.50987	0.946	3.5	1.2074	1.04	#DIV/0!	3.36675	1.447
Q9Z0M6	Isoform 3 of CD97 antigen OS=Mus musculus GN=Cd97	CD97_MOUSE	Cd97	6	8	7	5	5	9	3	3	6	2	1	1	2	4	5	6	5	2	1	1	1	2	2	0	3.34655	-2.004	0.6	1.24245	-1.565	0.4375	5.00431	-1.554
P02815	16.5 kDa submandibular gland glycoprotein OS=Mus musculus GN=Spt1 PE=2 SV=1	SG16_MOUSE	Spt1 Spt-1	0	0	0	0	0	0	3	5	5	0	0	9	0	1	0	0	1	0	2	1	2	24	9	0	0.162645	1.031	#DIV/0!	3.42609	0.692	1.72727	3.98985	0.725
P01844	Ig lambda-2 chain C region OS=Mus musculus GN=Iglc2 PE=1 SV=1	LAC2_MOUSE	Iglc2	11	16	10	10	11	9	6	9	7	5	3	3	11	15	12	10	22	6	8	15	10	7	11	4	0.490868	0.717	1.13433	5.40886	2.497	1.66667	3.86715	1.296
P01845	Ig lambda-3 chain C region OS=Mus musculus GN=Iglc3 PE=1 SV=1	LAC3_MOUSE	Iglc3	8	8	0	8	9	0	0	0	0	0	0	0	0	0	6	6	24	5	0	0	0	0	12	0	0.102669	0	1.24242	6.00749	0.941	#DIV/0!	1.90161	0.517
A2AQ07	Tubulin beta-1 chain OS=Mus musculus GN=Tubb1 PE=1 SV=1	TBB1_MOUSE	Tubb1	0	0	0	7	2	0	0	0	0	0	0	0	0	0	1	0	0	0	0	0	0	0	0	0	4.77057	-0.997	0.111111	0.166667	0	#DIV/0!	3.62488	-0.978
Q11136	Xaa-Pro dipeptidase OS=Mus musculus GN=Pepd PE=2 SV=3	PEPD_MOUSE	Pepd Pep4	9	9	10	5	8	6	0	1	0	0	0	0	4	2	5	3	7	4	0	0	1	0	0	0	6.62771	-3.676	0.531915	0.109404	0.053	1	6.06403	-1.27
P16092	Isoform 6 of Fibroblast growth factor receptor 1 OS=Mus musculus GN=Fgfr1	FGFR1_MOUSE	Fgfr1 Flg	1	1	3	2	2	3	1	0	1	1	0	0	0	0	1	0	1	2	0	0	0	0	0	0	2.89241	-2.272	0.333333	0.291431	-1.371	0	3.65654	-2.087
Q9QXE0	2-hydroxyacyl-CoA lyase 1 OS=Mus musculus GN=Hacl1 PE=1 SV=2	HACL1_MOUSE	Hacl1 Hpcl Phyh2	0	0	0	0	0	0	0	0	0	0	0	0	2	4	0	0	0	0	0	0	0	0	0	0	3.12968	1.277	#DIV/0!	0.166667	0	#DIV/0!	2.1667	1.223
P21658	Fibroblast growth factor 6 OS=Mus musculus GN=Fgf6 PE=2 SV=2	FGF6_MOUSE	Fgf6 Fgf-6 Hstf2	0	0	0	0	0	0	0	0	0	0	0	0	0	0	1	0	0	0	0	4	1	0	0	0	0.00753942	0.641	#DIV/0!	0.868299	1.042	#DIV/0!	1.01317	1.304
Q6IFZ6	Keratin, type II cytoskeletal 1b OS=Mus musculus GN=Krt77 PE=1 SV=1	K2C1B_MOUSE	Krt77 Krt1b	0	0	0	0	0	0	0	0	0	0	0	0	0	0	0	0	0	6	0	0	0	0	0	0	2.79411	0.91	#DIV/0!	0.166667	0	#DIV/0!	1.91338	0.91
P01746	Ig heavy chain V region 36-65 OS=Mus musculus PE=1 SV=1	HVM02_MOUSE	0	0	0	0	0	0	0	0	0	0	0	0	0	0	0	0	0	0	0	1	1	1	2	1	0	0.166667	0	#DIV/0!	1.77868	2.603	#DIV/0!	1.16983	1.94
P01639	Ig kappa chain V-V region MOPC 41 OS=Mus musculus GN=Gm5571 PE=1 SV=1	KV5A7_MOUSE	Gm5571	3	0	0	1	4	0	7	6	4	4	3	2	3	4	1	5	3	2	5	10	5	7	4	5	4.01118	1.698	2.25	1.31834	1.485	1.38462	5.01	2.119
Q8VCT4	Carboxylesterase 1D OS=Mus musculus GN=Ces1d PE=1 SV=1	CES1D_MOUSE	Ces1d Ces1 Ces3	0	0	0	0	0	0	0	71	68	0	0	0	27	35	0	0	0	0	0	0	0	0	0	36	69.6351	1.531	#DIV/0!	29.4862	-0.911	0.258993	0.604873	0
P70194	C-type lectin domain family 4 member F OS=Mus musculus GN=Clec4f PE=2 SV=1	CLC4F_MOUSE	Clec4f Clecsf13 Kclr	19	13	12	5	8	4	7	5	7	1	3	2	30	14	10	8	11	7	15	3	7	2	5	2	3.09964	0.748	1.31148	2.5319	0.766	1.36	5.72895	0.891
Q8C255	Isoform 3 of Dipeptidase 2 OS=Mus musculus GN=Dpep2	DPEP2_MOUSE	Dpep2 Mbd2	16	18	20	9	17	18	11	12	10	6	8	6	11	7	14	9	15	13	3	5	8	7	7	9	4.54777	-2.531	0.704082	1.09285	-1.409	0.735849	5.83126	-1.481
Q91X79	Chymotrypsin-like elastase family member 1 OS=Mus musculus GN=Cela1 PE=2 SV=1	CELA1_MOUSE	Cela1 Ela1	1	2	2	2	1	1	0	1	1	0	0	0	2	0	0	0	0	0	0	0	0	0	0	0	2.71959	-2.216	0.222222	0.0221517	-0.885	0	2.79658	-1.984
P01796	Ig heavy chain V-III region HPC76 (Fragment) OS=Mus musculus PE=4 SV=1	HVM27_MOUSE	0	2	1	0	0	0	0	0	0	0	0	0	0	1	0	0	0	0	3	0	1	0	3	3	1	0.000906208	0	1.33333	2.86051	1.906	#DIV/0!	1.77679	1.337
O35598	Disintegrin and metalloproteinase domain-containing protein 10 OS=Mus musculus GN=Adam10 PE=1 SV=2	ADA10_MOUSE	Adam10 Kuz Madm	0	0	1	0	0	0	0	0	1	1	0	0	3	1	4	0	0	0	1	1	2	0	0	0	3.60757	1.457	8	0.108427	0.777	2	3.49405	1.689
O89103	Complement component C1q receptor OS=Mus musculus GN=Cd93 PE=1 SV=1	C1QR1_MOUSE	Cd93 Aa4 C1qr1 C1qrp Ly68	9	5	2	2	3	5	2	4	4	0	1	2	2	3	7	1	2	1	0	1	3	0	0	0	2.22304	-0.994	0.615385	2.11685	-1.744	0.307692	4.57209	-1.337
P32848	Parvalbumin alpha OS=Mus musculus GN=Pvalb PE=1 SV=3	PRVA_MOUSE	Pvalb Pva	2	0	0	0	0	0	1	3	3	0	2	7	0	0	0	0	0	0	0	2	4	0	0	0	0.339878	-0.797	0	2.82793	-1.268	0.375	3.67334	-1.417
P24472	Glutathione S-transferase A4 OS=Mus musculus GN=Gsta4 PE=1 SV=3	GSTA4_MOUSE	Gsta4 Gsta	2	3	3	1	0	3	0	1	0	0	0	1	6	0	6	4	4	2	2	1	1	1	1	0	2.65874	1.396	1.83333	0.756544	1.404	3	3.90816	1.429
P02772	Alpha-fetoprotein OS=Mus musculus GN=Afp PE=2 SV=1	FETA_MOUSE	Afp	3	1	1	0	0	0	1	0	0	0	0	0	0	0	0	0	0	0	0	0	0	0	0	0	2.22732	-1.361	0	0.000229531	-0.598	0	2.03274	-1.503
Q6P069	Isoform 2 of Sorcin OS=Mus musculus GN=Sri	SORCN_MOUSE	Sri	2	0	1	0	0	1	0	1	1	0	0	0	0	0	0	0	0	0	0	0	0	0	0	0	1.43686	-1.489	0	0.0221517	-0.885	0	1.57239	-1.786
P05208	Chymotrypsin-like elastase family member 2A OS=Mus musculus GN=Cela2a PE=2 SV=1	CEL2A_MOUSE	Cela2a Ela-2 Ela2 Ela2a	0	2	1	1	1	1	0	0	0	0	0	0	0	0	0	0	0	0	0	0	0	0	0	0	2.61668	-2.742	0	0.166667	0	#DIV/0!	1.78085	-2.02
P68369	Tubulin alpha-1C chain OS=Mus musculus GN=Tuba1c PE=1 SV=1	TBA1A_MOUSE	Tuba1a Tuba1	0	0	0	6	0	0	0	0	0	0	0	0	0	0	0	0	0	0	0	0	0	0	0	0	3.92256	-0.925	0	0.166667	0	#DIV/0!	2.77764	-0.925
Q8BZ33	Tensin-4 OS=Mus musculus GN=Tns4 PE=2 SV=2	TENS4_MOUSE	Tns4	0	0	0	0	0	0	2	0	1	3	0	0	0	0	0	0	0	0	0	0	0	0	0	0	0.166667	0	#DIV/0!	1.64066	-1.519	0	1.07188	-1.394
Q00724	Retinol-binding protein 4 OS=Mus musculus GN=Rbp4 PE=2 SV=2	RET4_MOUSE	Rbp4	46	57	36	59	79	64	36	54	48	57	72	55	29	23	28	38	87	51	22	43	28	70	72	67	15.4698	-1.698	0.750733	0.102971	-0.143	0.937888	10.0142	-1.274
Q61176	Arginase-1 OS=Mus musculus GN=Arg1 PE=1 SV=1	ARGI1_MOUSE	Arg1	0	0	1	0	1	0	0	0	0	0	0	0	3	1	2	0	1	0	2	0	0	1	0	0	1.75459	1.438	3.5	0.609894	1.063	#DIV/0!	2.97469	1.856
P47876	Insulin-like growth factor-binding protein 1 OS=Mus musculus GN=Igfbp1 PE=2 SV=2	IBP1_MOUSE	Igfbp1 Igfbp-1	0	0	0	0	0	0	1	0	1	0	0	0	2	1	2	0	0	0	3	1	1	0	0	0	2.17968	1.693	#DIV/0!	0.523574	0.812	2.5	3.04274	1.848
Q9DC11	Plexin domain-containing protein 2 OS=Mus musculus GN=Plxdc2 PE=1 SV=1	PXDC2_MOUSE	Plxdc2 Tem7r	10	9	9	4	8	6	7	10	5	4	2	3	7	7	4	4	5	3	2	4	3	3	5	2	2.65636	-1.791	0.652174	1.28981	-1.342	0.612903	4.28276	-1.744
P84750	Ig kappa chain V region Mem5 (Fragment) OS=Mus musculus PE=1 SV=1	KVM5_MOUSE	0	0	0	0	0	1	0	0	0	0	0	0	0	1	1	0	0	0	1	0	0	3	1	0	1	0.295698	1.085	3	1.00396	1.396	#DIV/0!	1.71612	1.967
P04918	Serum amyloid A-3 protein OS=Mus musculus GN=Saa3 PE=2 SV=1	SAA3_MOUSE	Saa3	0	0	0	0	0	0	0	0	0	1	0	0	0	0	0	0	0	0	3	0	0	0	2	3	0.166667	0	#DIV/0!	2.81633	1.566	8	2.02061	1.403
P11627	Neural cell adhesion molecule L1 OS=Mus musculus GN=L1cam PE=1 SV=1	L1CAM_MOUSE	L1cam Caml1	16	15	11	7	5	4	7	6	5	7	4	5	6	7	5	8	7	3	2	6	4	4	4	5	4.95725	-1.356	0.62069	0.738525	-1.597	0.735294	5.72322	-1.438
P00688	Pancreatic alpha-amylase OS=Mus musculus GN=Amy2 PE=1 SV=2	AMYP_MOUSE	Amy2 Amy2a	21	29	35	21	29	27	9	26	31	16	16	11	21	16	16	20	25	27	10	12	14	20	20	11	3.78897	-2.355	0.771605	0.466428	-0.646	0.798165	4.09535	-1.129
Q9JJH1	Ribonuclease 4 OS=Mus musculus GN=Rnase4 PE=2 SV=1	RNAS4_MOUSE	Rnase4	10	9	10	7	10	5	5	6	8	3	3	7	14	15	12	7	13	9	5	9	8	4	5	8	3.6487	2.121	1.37255	0.677488	1.263	1.21875	4.45143	1.498
P97290	Plasma protease C1 inhibitor OS=Mus musculus GN=Serping1 PE=1 SV=3	IC1_MOUSE	Serping1 C1nh	96	88	82	65	120	75	84	100	94	71	65	70	73	59	68	58	108	87	45	72	68	79	77	80	4.69175	-1.575	0.861217	1.41716	-1.07	0.869835	5.98605	-1.208
Q64176	Carboxylesterase 1E OS=Mus musculus GN=Ces1e PE=1 SV=1	EST1E_MOUSE	Ces1e Es22	0	24	58	0	25	12	18	26	21	15	17	17	13	24	0	13	30	0	16	26	19	12	12	15	4.10194	-0.492	0.672269	0.169787	-0.537	0.877193	3.263	-0.612
Q61233	Plastin-2 OS=Mus musculus GN=Lcp1 PE=1 SV=4	PLSL_MOUSE	Lcp1 Pls2	9	7	7	3	8	12	7	14	15	6	5	6	13	7	13	2	6	6	19	17	22	7	6	8	0.0212791	0	1.02174	6.9748	1.542	1.49057	4.26892	1.298
Q03401	Cysteine-rich secretory protein 1 OS=Mus musculus GN=Crisp1 PE=2 SV=1	CRIS1_MOUSE	Crisp1 Aeg-1 Aeg1	0	0	0	4	11	4	0	0	0	0	5	7	0	0	0	1	8	1	0	0	0	2	2	1	2.59763	-0.842	0.526316	1.78565	-0.845	0.416667	4.94557	-1.221
O55226	Chondroadherin OS=Mus musculus GN=Chad PE=2 SV=1	CHAD_MOUSE	Chad	1	2	1	1	0	1	0	0	1	0	1	0	0	0	1	0	0	0	0	0	0	0	0	0	1.74365	-2.118	0.166667	0.0603935	-0.942	0	2.02934	-2.158
Q64695	Endothelial protein C receptor OS=Mus musculus GN=Procr PE=2 SV=3	EPCR_MOUSE	Procr Epcr	0	0	0	1	2	3	0	0	2	0	0	0	0	0	0	0	1	0	0	0	0	0	0	0	1.81671	-1.362	0.166667	0.0213038	-0.667	0	1.93392	-1.53
P97300	Isoform 4 of Neuroplastin OS=Mus musculus GN=Nptn	NPTN_MOUSE	Nptn Sdfr1 Sdr1	4	4	2	2	5	3	1	5	4	1	1	0	1	0	4	2	3	2	1	1	0	2	0	0	1.4273	-1.531	0.6	1.01636	-1.207	0.333333	2.8228	-1.647
Q60847	Isoform 5 of Collagen alpha-1(XII) chain OS=Mus musculus GN=Col12a1	COCA1_MOUSE	Col12a1	4	3	0	0	0	2	0	0	1	0	0	0	0	0	0	0	1	0	0	1	0	0	0	0	4.83554	-1.639	0.111111	0.111689	0.049	1	3.35948	-1.464
Q05816	Fatty acid-binding protein, epidermal OS=Mus musculus GN=Fabp5 PE=1 SV=3	FABP5_MOUSE	Fabp5 Fabpe Klbp Mal1	4	2	1	0	1	1	0	0	0	0	0	0	6	2	4	0	0	0	1	2	5	0	0	0	0.265795	0	1.33333	2.64746	1.505	#DIV/0!	2.13198	0.998
P52430	Serum paraoxonase/arylesterase 1 OS=Mus musculus GN=Pon1 PE=1 SV=2	PON1_MOUSE	Pon1 Pon	37	41	50	41	53	34	38	56	63	29	22	19	37	39	39	33	45	40	18	44	40	21	23	23	0.432025	-0.961	0.910156	3.94718	-1.188	0.744493	3.12359	-0.897
Q01339	Beta-2-glycoprotein 1 OS=Mus musculus GN=Apoh PE=1 SV=1	APOH_MOUSE	Apoh B2gp1	284	331	350	208	376	252	435	522	495	478	434	375	206	113	288	265	430	300	267	436	398	487	493	467	8.5442	-0.732	0.889506	0.653736	-0.318	0.930267	6.65848	-0.715
P01806	Ig heavy chain V region MOPC 173 OS=Mus musculus PE=1 SV=1	HVM36_MOUSE	0	2	3	1	2	4	2	0	1	0	0	0	0	2	3	2	0	4	1	0	4	5	7	0	0	0.0678475	-0.526	0.857143	6.70823	1.76	16	1.47595	1.075
Q61490	CD166 antigen OS=Mus musculus GN=Alcam PE=1 SV=3	CD166_MOUSE	Alcam	4	3	2	1	1	1	4	1	2	0	0	1	3	1	1	1	0	0	0	1	1	0	0	0	1.19285	-1.126	0.5	1.47081	-1.228	0.25	3.06178	-1.638
Q9D1A2	Cytosolic non-specific dipeptidase OS=Mus musculus GN=Cndp2 PE=1 SV=1	CNDP2_MOUSE	Cndp2 Cn2	0	0	0	0	0	0	0	0	0	0	0	0	4	0	1	0	0	0	0	0	0	0	0	0	2.1109	1.117	#DIV/0!	0.166667	0	#DIV/0!	1.40889	1.088
P06327	Ig heavy chain V region VH558 A1/A4 OS=Mus musculus GN=Gm5629 PE=4 SV=1	HVM52_MOUSE	Gm5629	0	0	0	0	0	0	0	0	0	0	0	0	0	0	1	2	1	0	0	0	0	1	0	0	1.4889	1.433	#DIV/0!	0.00214747	0.557	#DIV/0!	1.35838	1.563
Q8C9B9	Death-inducer obliterator 1 OS=Mus musculus GN=Dido1 PE=1 SV=4	DIDO1_MOUSE	Dido1 Datf1 Dio1	0	0	0	0	0	0	0	0	0	0	0	0	0	0	1	0	0	0	0	0	1	1	1	1	0.00753942	0.641	#DIV/0!	0.67106	1.939	#DIV/0!	0.844422	0.638
Q64127	Isoform Short of Transcription intermediary factor 1-alpha OS=Mus musculus GN=Trim24	TIF1A_MOUSE	Trim24 Tif1 Tif1a	0	0	0	0	0	0	0	0	0	0	0	0	0	0	0	0	1	3	0	0	0	0	0	1	1.10877	1.061	#DIV/0!	0.000907433	0.569	#DIV/0!	1.07562	1.247
P06684	Complement C5 OS=Mus musculus GN=C5 PE=1 SV=2	CO5_MOUSE	C5 Hc	152	115	118	147	249	167	89	134	147	155	145	168	131	112	110	102	230	157	103	136	148	185	200	206	6.61465	-0.927	0.888186	16.0975	1.424	1.16706	0.522536	0
O88668	Protein CREG1 OS=Mus musculus GN=Creg1 PE=2 SV=1	CREG1_MOUSE	Creg1 Creg	3	4	3	1	2	2	0	1	0	0	0	0	6	6	6	2	4	3	0	1	1	0	0	0	3.52616	2.148	1.8	0.00179362	0.456	2	3.46495	1.235
P09803	Cadherin-1 OS=Mus musculus GN=Cdh1 PE=1 SV=1	CADH1_MOUSE	Cdh1	9	11	9	4	3	4	12	10	18	10	4	10	3	4	7	3	5	1	5	7	11	12	6	9	4.32239	-1.611	0.575	0.672391	-0.917	0.78125	4.2362	-1.806
P33434	72 kDa type IV collagenase OS=Mus musculus GN=Mmp2 PE=2 SV=1	MMP2_MOUSE	Mmp2	17	15	15	3	1	1	4	6	8	2	1	0	8	10	9	4	1	0	2	5	6	0	1	2	3.82452	-0.786	0.615385	0.0739783	-0.346	0.761905	3.64623	-0.77
Q9ESB3	Histidine-rich glycoprotein OS=Mus musculus GN=Hrg PE=1 SV=2	HRG_MOUSE	Hrg	178	237	198	124	203	137	297	391	372	358	270	284	212	165	168	162	267	217	212	350	316	356	307	326	10.4646	1.532	1.10585	0.000154116	-0.024	0.946755	4.48372	0.799
Q9Z0K8	Pantetheinase OS=Mus musculus GN=Vnn1 PE=1 SV=3	VNN1_MOUSE	Vnn1	6	3	1	2	1	3	2	2	0	0	1	0	4	6	4	1	6	5	1	2	1	0	2	3	1.46251	1.136	1.625	0.41011	0.974	1.8	2.19991	1.125
P70389	Insulin-like growth factor-binding protein complex acid labile subunit OS=Mus musculus GN=Igfals PE=2 SV=1	ALS_MOUSE	Igfals Albs Als	52	52	57	37	60	38	25	31	31	21	14	15	47	32	39	36	50	43	17	23	24	19	15	15	3.25337	-1.848	0.834459	0.622792	-0.896	0.824818	3.95158	-0.639
P23953	Carboxylesterase 1C OS=Mus musculus GN=Ces1c PE=1 SV=4	EST1C_MOUSE	Ces1c Es1	273	376	501	237	390	284	332	526	552	351	238	227	307	419	406	225	398	264	222	468	449	280	250	234	0.76651	0	0.979622	6.93655	-0.676	0.854897	1.11042	-0.224
E9Q7X6-2	Isoform 2 of Protein HEG homolog 1 OS=Mus musculus GN=Heg1	HEG1_MOUSE	Heg1	5	4	0	2	3	3	7	8	7	4	4	4	4	2	0	2	0	1	4	5	4	3	3	3	1.67346	-1.14	0.529412	1.08522	-1.788	0.647059	2.99538	-1.873
Q9JI58	Retinoic acid early-inducible protein 1-epsilon OS=Mus musculus GN=Raet1e PE=1 SV=1	RAE1D_MOUSE	Raet1d	0	0	0	0	0	0	0	0	1	0	0	0	0	0	0	0	0	0	0	0	2	0	2	3	0.166667	0	#DIV/0!	1.58326	1.485	7	1.08116	-0.5
Q9WTR5	Cadherin-13 OS=Mus musculus GN=Cdh13 PE=1 SV=2	CAD13_MOUSE	Cdh13	7	7	7	4	5	4	7	5	9	6	5	4	6	8	4	4	4	4	3	2	4	4	1	2	0.051983	-0.374	0.882353	4.46191	-3.124	0.444444	2.49657	-1.665
O89020	Afamin OS=Mus musculus GN=Afm PE=1 SV=2	AFAM_MOUSE	Afm	187	207	214	101	158	119	413	544	537	421	347	327	174	90	167	137	203	172	251	466	441	443	381	333	0.188508	-0.14	0.956389	3.60376	-1.052	0.894168	3.25758	-0.309
P01663	Ig kappa chain V-III region PC 4050 OS=Mus musculus PE=1 SV=1	KV3AB_MOUSE	0	1	2	0	0	0	0	0	0	0	0	0	2	0	0	0	0	0	0	0	0	0	0	0	0	0.697713	-1.173	0	0.121467	-0.74	0	1.18913	-1.513
Q00651	Integrin alpha-4 OS=Mus musculus GN=Itga4 PE=1 SV=1	ITA4_MOUSE	Itga4	2	2	1	0	0	0	0	0	0	0	0	0	0	0	0	0	0	0	0	0	0	0	0	0	2.0623	-1.62	0	0.166667	0	#DIV/0!	1.37365	-1.466
Q80T21	ADAMTS-like protein 4 OS=Mus musculus GN=Adamtsl4 PE=2 SV=1	ATL4_MOUSE	Adamtsl4 Tsrc1	1	0	0	1	0	1	0	1	0	0	0	1	0	0	0	0	0	0	0	0	0	0	0	0	0.90735	-1.61	0	0.0634531	-0.946	0	1.25417	-2.02
Q9D1J3	SAP domain-containing ribonucleoprotein OS=Mus musculus GN=Sarnp PE=1 SV=3	SARNP_MOUSE	Sarnp Hcc1	0	1	1	0	1	1	0	0	1	0	0	0	0	0	0	0	0	0	0	0	0	0	0	0	1.02779	-2.059	0	0.013572	-0.5	0	0.917798	-1.967
P97861	Keratin, type II cuticular Hb1 OS=Mus musculus GN=Krt81 PE=2 SV=2	KRT86_MOUSE	Krt86 Krt2-10 Krthb6	0	0	0	0	0	0	0	0	5	0	0	0	0	0	0	0	0	0	0	0	0	0	0	0	0.166667	0	#DIV/0!	0.654433	-0.833	0	0.40098	-0.833
P01867	Isoform 2 of Ig gamma-2B chain C region OS=Mus musculus GN=Igh-3	IGG2B_MOUSE	Igh-3	9	0	5	0	0	0	3	1	1	0	0	0	9	0	10	0	0	0	6	2	5	0	0	0	0.495588	0	1.35714	2.43658	0.981	2.6	2.55613	0.682
P47880	Insulin-like growth factor-binding protein 6 OS=Mus musculus GN=Igfbp6 PE=2 SV=2	IBP6_MOUSE	Igfbp6 Igfbp-6	3	4	2	2	2	2	7	6	6	5	2	3	1	2	1	1	1	0	3	3	7	2	3	2	2.80082	-2.542	0.4	0.675961	-1.062	0.689655	3.22935	-2.109
P06869	Urokinase-type plasminogen activator OS=Mus musculus GN=Plau PE=1 SV=1	UROK_MOUSE	Plau	0	2	0	0	0	0	10	4	3	9	4	4	0	1	0	0	0	0	3	3	2	6	1	4	0.000249243	-0.292	0.5	2.73481	-1.395	0.558824	2.70567	-1.018
P20152	Vimentin OS=Mus musculus GN=Vim PE=1 SV=3	VIME_MOUSE	Vim	5	1	1	3	1	1	1	2	1	0	0	0	1	1	1	1	1	0	0	1	0	0	0	0	2.49548	-1.356	0.416667	0.188193	-0.985	0.25	3.03009	-1.459
O09164	Extracellular superoxide dismutase [Cu-Zn] OS=Mus musculus GN=Sod3 PE=1 SV=1	SODE_MOUSE	Sod3	31	29	22	16	26	20	39	49	47	34	29	29	30	33	30	16	37	32	31	54	45	30	30	37	4.27463	1.625	1.23611	0.282341	0.587	1	3.44766	1.676
Q9R0Y5	Isoform 2 of Adenylate kinase isoenzyme 1 OS=Mus musculus GN=Ak1	KAD1_MOUSE	Ak1	0	3	5	5	1	2	0	2	2	0	0	2	1	3	2	2	0	1	0	0	1	0	0	0	1.08742	-0.908	0.5625	0.77338	-1.312	0.166667	2.20334	-1.153
P05532	Isoform 2 of Mast/stem cell growth factor receptor Kit OS=Mus musculus GN=Kit	KIT_MOUSE	Kit Sl	2	3	2	0	1	1	1	1	0	0	0	0	0	0	1	1	0	1	0	0	0	0	0	0	1.41589	-1.513	0.333333	0.0719787	-0.953	0	1.8008	-1.557
P35918	Isoform 2 of Vascular endothelial growth factor receptor 2 OS=Mus musculus GN=Kdr	VGFR2_MOUSE	Kdr Flk-1 Flk1	4	3	2	2	3	2	2	1	0	0	0	0	1	0	3	1	2	1	0	0	0	0	0	0	2.10903	-1.939	0.5	0.363392	-1.011	0	2.96025	-1.565
P16056	Hepatocyte growth factor receptor OS=Mus musculus GN=Met PE=1 SV=1	MET_MOUSE	Met	8	3	5	6	6	5	2	3	4	3	1	3	3	2	3	3	2	6	1	2	2	2	2	2	3.40583	-1.867	0.575758	0.229928	-1.42	0.6875	3.63879	-1.595
P35505	Fumarylacetoacetase OS=Mus musculus GN=Fah PE=1 SV=2	FAAA_MOUSE	Fah	3	1	2	1	3	2	1	2	3	3	2	2	6	6	3	2	3	4	2	2	3	2	4	2	4.06567	2.291	2	0.101951	0.917	1.15385	3.56589	2.152
Q923D2	Flavin reductase (NADPH) OS=Mus musculus GN=Blvrb PE=2 SV=3	BLVRB_MOUSE	Blvrb	5	5	2	6	5	4	1	1	0	1	2	1	4	2	1	2	2	2	1	1	1	0	2	0	4.54645	-2.416	0.481481	0.0014488	-0.277	0.833333	3.88186	-1.527
Q8BND5	Sulfhydryl oxidase 1 OS=Mus musculus GN=Qsox1 PE=1 SV=1	QSOX1_MOUSE	Qsox1 Qscn6 Sox	65	46	36	34	60	52	58	71	67	52	51	53	44	33	30	28	59	45	49	48	56	46	62	54	6.349	-1.352	0.8157	0.201289	-0.432	0.894886	4.58651	-1.419
P01895	H-2 class I histocompatibility antigen, D-P alpha chain OS=Mus musculus GN=H2-D1 PE=2 SV=1	HA1Y_MOUSE	H2-D1	0	1	2	0	4	2	0	0	0	0	0	0	0	0	1	0	0	0	0	0	0	0	0	1	2.91638	-1.811	0.111111	0.000907433	0.569	#DIV/0!	1.54024	-1.333
Q91V64	Isochorismatase domain-containing protein 1 OS=Mus musculus GN=Isoc1 PE=1 SV=1	ISOC1_MOUSE	Isoc1	2	1	1	0	1	1	0	0	1	0	0	0	0	0	0	0	0	1	0	0	0	0	0	0	1.62556	-1.84	0.166667	0.013572	-0.5	0	1.44782	-1.708
Q61503	5'-nucleotidase OS=Mus musculus GN=Nt5e PE=1 SV=2	5NTD_MOUSE	Nt5e Nt5 Nte	0	2	1	0	0	0	0	0	0	0	0	0	2	3	3	0	0	0	2	0	0	0	0	0	1.68288	1.148	2.66667	0.269578	0.783	#DIV/0!	2.42575	1.38
P09055	Isoform 2 of Integrin beta-1 OS=Mus musculus GN=Itgb1	ITB1_MOUSE	Itgb1	8	6	4	5	4	5	4	2	2	2	3	2	4	3	4	0	5	3	2	2	2	1	1	2	3.87425	-1.99	0.59375	0.366448	-1.132	0.666667	4.31785	-1.73
Q00993	Tyrosine-protein kinase receptor UFO OS=Mus musculus GN=Axl PE=1 SV=2	UFO_MOUSE	Axl Ark Ufo	2	2	3	0	0	0	1	1	2	0	0	0	5	1	3	1	0	0	7	1	1	1	0	1	0.449158	0.592	1.42857	3.03269	1.004	2.75	3.26415	1.221
P01864	Ig gamma-2A chain C region secreted form OS=Mus musculus PE=1 SV=1	GCAB_MOUSE	0	0	0	0	0	0	0	5	3	0	0	0	0	0	0	6	0	0	0	4	3	4	0	0	0	3.05758	0.915	#DIV/0!	0.214349	0.405	1.375	2.50385	0.976
P07141	Isoform 2 of Macrophage colony-stimulating factor 1 OS=Mus musculus GN=Csf1	CSF1_MOUSE	Csf1 Csfm	6	5	5	2	2	2	2	4	3	2	1	1	1	2	4	2	3	2	2	0	3	0	1	0	1.42001	-1.272	0.636364	0.647422	-1.167	0.461538	2.4227	-1.446
Q93092	Transaldolase OS=Mus musculus GN=Taldo1 PE=1 SV=2	TALDO_MOUSE	Taldo1 Tal Taldo	5	3	3	2	2	2	3	3	5	4	1	3	7	4	6	3	1	1	8	5	8	2	3	3	0.693708	0.752	1.29412	2.27002	1.342	1.52632	3.03927	1.554
P04186	Complement factor B OS=Mus musculus GN=Cfb PE=1 SV=2	CFAB_MOUSE	Cfb Bf H2-Bf	210	252	227	141	234	167	501	689	658	682	591	570	271	256	194	148	298	249	464	593	533	631	618	606	20.436	1.722	1.15028	0.106474	-0.134	0.933351	5.3104	0.304
P01868	Ig gamma-1 chain C region, membrane-bound form OS=Mus musculus GN=Ighg1 PE=1 SV=2	IGHG1_MOUSE	Ighg1 Igh-4	25	6	2	0	0	0	12	1	2	1	0	0	4	1	15	0	0	0	2	1	7	1	0	0	4.01331	-0.476	0.606061	0.692478	-0.41	0.6875	4.97437	-0.6
Q02105	Complement C1q subcomponent subunit C OS=Mus musculus GN=C1qc PE=2 SV=2	C1QC_MOUSE	C1qc C1qg	16	15	18	14	14	13	15	23	24	16	10	21	13	18	12	15	16	17	15	24	16	27	26	26	0.0492058	0	1.01111	3.68459	1.988	1.22936	2.44121	1.735
Q64437	Alcohol dehydrogenase class 4 mu/sigma chain OS=Mus musculus GN=Adh7 PE=2 SV=2	ADH7_MOUSE	Adh7 Adh-3 Adh3	1	0	0	0	0	0	0	0	1	0	0	0	0	0	0	4	0	0	0	0	1	2	0	1	0.941364	0.672	4	0.311164	1.075	4	1.70027	1.077
Q9JLJ2	4-trimethylaminobutyraldehyde dehydrogenase OS=Mus musculus GN=Aldh9a1 PE=1 SV=1	AL9A1_MOUSE	Aldh9a1	0	0	1	1	0	0	0	0	0	0	0	0	1	1	3	1	1	1	0	0	0	0	0	0	2.15447	1.967	4	0.166667	0	#DIV/0!	1.61913	1.495
P15626	Glutathione S-transferase Mu 2 OS=Mus musculus GN=Gstm2 PE=1 SV=2	GSTM2_MOUSE	Gstm2	0	0	0	0	0	2	0	0	0	0	0	0	8	0	0	0	0	0	0	0	0	0	0	0	2.10073	0.675	4	0.166667	0	#DIV/0!	1.5771	0.674
P06151	L-lactate dehydrogenase A chain OS=Mus musculus GN=Ldha PE=1 SV=3	LDHA_MOUSE	Ldha Ldh-1 Ldh1	5	3	0	4	4	4	3	1	0	0	0	2	12	3	5	0	4	3	1	2	3	2	2	2	0.612654	0.509	1.35	0.666407	1.208	2	1.44225	0.739
P35917	Vascular endothelial growth factor receptor 3 OS=Mus musculus GN=Flt4 PE=1 SV=1	VGFR3_MOUSE	Flt4 Flt-4 Vegfr3	31	30	25	23	29	29	30	34	35	24	19	20	30	22	21	20	29	25	16	21	25	26	23	15	1.05518	-1.111	0.88024	2.00636	-1.622	0.777778	3.01013	-1.325
Q9JHJ8	Isoform 2 of ICOS ligand OS=Mus musculus GN=Icoslg	ICOSL_MOUSE	Icoslg B7h2 B7rp1 Icosl	6	6	4	5	3	4	3	3	4	2	1	0	2	3	1	4	4	3	1	2	2	2	1	0	2.4958	-1.879	0.607143	0.281538	-0.906	0.615385	2.98846	-1.503
P20060	Beta-hexosaminidase subunit beta OS=Mus musculus GN=Hexb PE=2 SV=2	HEXB_MOUSE	Hexb	4	7	3	1	2	3	1	4	1	1	0	1	8	6	8	3	4	2	1	3	4	1	0	1	2.6299	1.346	1.55	0.0697799	0.509	1.25	2.72282	1.103
P70694	Estradiol 17 beta-dehydrogenase 5 OS=Mus musculus GN=Akr1c6 PE=1 SV=1	DHB5_MOUSE	Akr1c6 Hsd17b5	0	0	0	0	0	0	0	0	0	0	0	0	4	0	0	0	0	0	0	0	0	0	0	0	1.34178	0.874	#DIV/0!	0.166667	0	#DIV/0!	0.862807	0.873
Q61790	Lymphocyte activation gene 3 protein OS=Mus musculus GN=Lag3 PE=2 SV=1	LAG3_MOUSE	Lag3	0	0	0	0	0	0	0	0	0	0	0	0	1	0	2	0	0	0	0	0	1	0	0	0	0.736793	1.143	#DIV/0!	0.00586536	0.534	#DIV/0!	0.730851	1.329
Q91XQ0	Isoform 2 of Dynein heavy chain 8, axonemal OS=Mus musculus GN=Dnah8	DYH8_MOUSE	Dnah8 Dnahc8	0	0	0	0	0	0	0	0	0	0	0	0	0	1	0	0	0	0	0	1	0	1	0	1	0.0103208	0.648	#DIV/0!	0.29213	1.39	#DIV/0!	0.514919	1.615
P00755	Kallikrein 1-related peptidase b9 OS=Mus musculus GN=Klk1b9 PE=2 SV=1	K1KB1_MOUSE	Klk1b1 Klk-1 Klk1	0	0	0	0	0	0	0	0	0	0	0	0	0	0	0	0	1	1	0	0	0	0	1	1	0.136941	1.021	#DIV/0!	0.0920289	0.99	#DIV/0!	0.528894	1.639
P04071	Kallikrein 1-related peptidase b16 OS=Mus musculus GN=Klk1b16 PE=1 SV=2	K1B16_MOUSE	Klk1b16 Klk-16 Klk16	0	0	0	0	0	0	0	0	0	0	0	0	0	0	0	0	2	2	0	0	0	0	0	0	0.951418	1.233	#DIV/0!	0.166667	0	#DIV/0!	0.59685	1.172
P01647	Ig kappa chain V-V region HP 124E1 OS=Mus musculus PE=1 SV=1	KV5AE_MOUSE	0	0	0	0	0	0	0	0	0	0	0	0	0	0	0	0	0	0	0	0	0	0	0	4	0	0.166667	0	#DIV/0!	0.759616	0.842	#DIV/0!	0.469627	0.534
Q91X17	Uromodulin OS=Mus musculus GN=Umod PE=1 SV=1	UROM_MOUSE	Umod	9	10	7	7	7	5	9	10	6	6	7	8	7	2	5	3	8	5	2	13	5	5	6	5	3.24494	-2.065	0.666667	0.866302	-1.066	0.782609	4.13829	-2.254
P01728	Ig lambda-2 chain V region OS=Mus musculus PE=3 SV=1	LV2A_MOUSE	0	6	4	1	0	3	0	2	2	1	0	2	2	4	3	4	4	5	5	1	2	1	1	3	2	2.96621	1.539	1.78571	2.74756e-06	0.288	1.11111	2.38938	1.289
Q00519	Xanthine dehydrogenase/oxidase OS=Mus musculus GN=Xdh PE=1 SV=5	XDH_MOUSE	Xdh	14	4	6	4	1	3	6	7	11	4	5	3	3	5	8	1	4	0	3	6	5	4	7	1	2.79978	-0.814	0.65625	0.548008	-0.974	0.722222	3.31599	-1.151
P01887	Beta-2-microglobulin OS=Mus musculus GN=B2m PE=1 SV=2	B2MG_MOUSE	B2m	24	20	27	11	25	9	22	32	43	42	28	26	24	27	19	22	34	22	18	39	29	38	35	29	5.76522	1.952	1.27586	0.0425174	0.279	0.974093	3.42229	1.694
Q9CVB6	Actin-related protein 2/3 complex subunit 2 OS=Mus musculus GN=Arpc2 PE=1 SV=3	ARPC2_MOUSE	Arpc2	2	1	2	1	1	3	0	0	0	0	0	0	1	1	0	1	0	0	0	0	0	0	0	0	2.19442	-2.053	0.3	0.166667	0	#DIV/0!	1.72111	-1.432
P19096	Fatty acid synthase OS=Mus musculus GN=Fasn PE=1 SV=2	FAS_MOUSE	Fasn	0	0	1	0	0	0	0	0	0	0	0	0	1	0	5	0	0	0	0	0	0	0	0	0	1.98797	0.931	6	0.166667	0	#DIV/0!	1.40301	0.912
P25785	Metalloproteinase inhibitor 2 OS=Mus musculus GN=Timp2 PE=1 SV=2	TIMP2_MOUSE	Timp2 Timp-2	4	1	3	1	0	0	6	5	7	4	2	1	1	2	0	0	0	0	1	4	5	4	2	1	1.9057	-1.133	0.333333	0.674603	-0.999	0.68	2.54026	-1.422
P16675	Lysosomal protective protein OS=Mus musculus GN=Ctsa PE=1 SV=1	PPGB_MOUSE	Ctsa Ppgb	10	12	9	8	11	11	6	4	3	1	2	1	16	10	15	5	11	8	8	10	7	2	3	1	0.168726	0	1.06557	3.38836	1.294	1.82353	1.79173	0.719
P47867	Isoform 2 of Secretogranin-3 OS=Mus musculus GN=Scg3	SCG3_MOUSE	Scg3	2	1	3	1	2	1	0	3	3	0	0	0	0	0	1	1	0	0	0	2	2	1	0	0	2.89326	-2.584	0.2	0.0486029	-0.042	0.833333	1.76491	-1.666
Q922D8	C-1-tetrahydrofolate synthase, cytoplasmic OS=Mus musculus GN=Mthfd1 PE=1 SV=4	C1TC_MOUSE	Mthfd1	0	0	2	1	1	0	0	0	1	0	0	0	3	1	6	0	0	0	0	2	0	0	0	0	2.12153	0.957	2.5	0.00204094	0.36	2	1.96868	0.992
O09051	Guanylate cyclase activator 2B OS=Mus musculus GN=Guca2b PE=2 SV=2	GUC2B_MOUSE	Guca2b	5	6	7	3	3	1	3	0	1	0	1	1	4	1	2	2	2	3	1	0	0	1	1	1	2.35407	-1.599	0.56	0.0413878	-0.476	0.666667	2.44259	-1.216
P35454	Vasopressin-neurophysin 2-copeptin OS=Mus musculus GN=Avp PE=2 SV=1	NEU1_MOUSE	Oxt	2	0	1	1	0	0	0	0	0	0	0	0	0	0	0	0	0	0	0	0	0	0	0	0	1.55602	-1.528	0	0.166667	0	#DIV/0!	1.01224	-1.397
P36369	Kallikrein 1-related peptidase b26 OS=Mus musculus GN=Klk1b26 PE=2 SV=1	K1B26_MOUSE	Klk1b26 Klk-26 Klk26	4	0	0	0	0	0	0	0	0	0	0	0	0	0	0	0	0	0	0	0	0	0	0	0	1.72537	-0.887	0	0.166667	0	#DIV/0!	1.1319	-0.886
Q4VAH7	HEPACAM family member 2 OS=Mus musculus GN=Hepacam2 PE=2 SV=1	HECA2_MOUSE	Hepacam2 Miki	1	1	0	1	1	0	0	0	0	0	0	0	0	0	0	0	0	0	0	0	0	0	0	0	1.3274	-2.102	0	0.166667	0	#DIV/0!	0.852858	-1.716
A2AJ76	Hemicentin-2 OS=Mus musculus GN=Hmcn2 PE=2 SV=1	HMCN2_MOUSE	Hmcn2	0	1	1	2	0	0	0	0	0	0	0	0	0	0	0	0	0	0	0	0	0	0	0	0	1.4461	-1.451	0	0.166667	0	#DIV/0!	0.935288	-1.342
A2ASQ1	Isoform 3 of Agrin OS=Mus musculus GN=Agrn	AGRIN_MOUSE	Agrn Agrin	0	1	1	0	0	1	1	0	0	0	0	0	0	0	0	0	0	0	0	0	0	0	0	0	0.595558	-1.526	0	0.000229531	-0.598	0	0.705386	-1.704
Q8BHR2	Isoform 2 of Ecto-NOX disulfide-thiol exchanger 1 OS=Mus musculus GN=Enox1	ENOX1_MOUSE	Enox1	0	1	1	0	1	0	0	0	0	1	0	0	0	0	0	0	0	0	0	0	0	0	0	0	0.451367	-1.47	0	0.00361423	-0.547	0	0.515806	-1.636
Q8VDC1	FYVE and coiled-coil domain-containing protein 1 OS=Mus musculus GN=Fyco1 PE=1 SV=1	FYCO1_MOUSE	Fyco1	0	1	2	0	0	0	0	0	1	0	0	0	0	0	0	0	0	0	0	0	0	0	0	0	0.507149	-1.122	0	0.013572	-0.5	0	0.513508	-1.305
Q91XA9	Acidic mammalian chitinase OS=Mus musculus GN=Chia PE=1 SV=2	CHIA_MOUSE	Chia Chia1	0	1	0	0	2	1	0	0	0	0	0	0	0	0	0	0	0	0	0	0	0	0	0	0	0.955489	-1.576	0	0.166667	0	#DIV/0!	0.599577	-1.414
Q9JI18	Low-density lipoprotein receptor-related protein 1B OS=Mus musculus GN=Lrp1b PE=1 SV=1	LRP1B_MOUSE	Lrp1b Lrpdit	0	4	0	0	0	0	0	0	0	0	0	0	0	0	0	0	0	0	0	0	0	0	0	0	1.13937	-0.866	0	0.166667	0	#DIV/0!	0.723809	-0.864
Q924A2	Isoform 2 of Protein capicua homolog OS=Mus musculus GN=Cic	CIC_MOUSE	Cic Kiaa0306	0	0	1	0	0	0	0	1	1	0	0	1	0	0	0	0	0	0	0	0	0	0	0	0	6.29554e-05	-0.596	0	0.232548	-1.331	0	0.379345	-1.561
A3FIN4	Isoform 3 of Phospholipid-transporting ATPase FetA OS=Mus musculus GN=Atp8b5	AT8B5_MOUSE	Atp8b5 Feta	0	0	0	1	0	0	1	0	0	0	1	1	0	0	0	0	0	0	0	0	0	0	0	0	0.0244441	-0.673	0	0.450475	-1.472	0	0.720285	-1.688
Q921C3	Isoform B of Bromodomain and WD repeat-containing protein 1 OS=Mus musculus GN=Brwd1	BRWD1_MOUSE	Brwd1 Wdr9	0	0	0	0	1	0	0	1	0	1	0	1	0	0	0	0	0	0	0	0	0	0	0	0	0.00196224	-0.561	0	0.278257	-1.369	0	0.381373	-1.575
P97326	Cadherin-6 OS=Mus musculus GN=Cdh6 PE=1 SV=2	CADH6_MOUSE	Cdh6	0	0	0	0	0	0	1	1	2	0	0	0	0	0	0	0	0	0	0	0	0	0	0	0	0.166667	0	#DIV/0!	0.502578	-1.427	0	0.303454	-1.3
Q99K51	Plastin-3 OS=Mus musculus GN=Pls3 PE=1 SV=3	PLST_MOUSE	Pls3	0	0	0	0	0	0	0	4	0	0	0	0	0	0	0	0	0	0	0	0	0	0	0	0	0.166667	0	#DIV/0!	0.377818	-0.802	0	0.224918	-0.802
P98086	Complement C1q subcomponent subunit A OS=Mus musculus GN=C1qa PE=1 SV=2	C1QA_MOUSE	C1qa	13	20	17	8	20	15	5	13	15	7	5	6	17	21	16	8	26	17	5	15	10	9	9	12	1.05577	1.078	1.12903	1.1427	1.411	1.17647	2.25316	0.864
Q80U57	Regulating synaptic membrane exocytosis protein 3 OS=Mus musculus GN=Rims3 PE=2 SV=2	RIMS3_MOUSE	Rims3 Kiaa0237	0	0	0	0	0	0	0	3	2	0	1	2	0	0	0	0	0	0	0	1	0	0	1	0	0.166667	0	#DIV/0!	1.00135	-1.478	0.25	0.703881	-1.24
O88783	Coagulation factor V OS=Mus musculus GN=F5 PE=1 SV=1	FA5_MOUSE	F5	140	127	117	97	145	102	78	102	94	74	68	78	130	141	107	87	131	116	73	119	97	75	75	90	0.00548256	0	0.978022	3.28501	1.66	1.07085	1.32556	0.316
Q06890	Clusterin OS=Mus musculus GN=Clu PE=1 SV=1	CLUS_MOUSE	Clu Apoj Msgp-2	92	125	107	84	130	99	255	393	382	432	334	287	132	137	93	91	169	127	236	327	294	383	381	334	13.6472	2.629	1.17582	0.000145615	0	0.93855	4.22709	0.334
Q91Y47	Coagulation factor XI OS=Mus musculus GN=F11 PE=2 SV=2	FA11_MOUSE	F11	14	7	10	6	12	8	7	9	7	7	10	9	11	9	7	6	3	4	7	10	7	5	5	6	1.98917	-1.127	0.701754	0.336068	-0.905	0.816327	2.31612	-1.323
Q02819	Nucleobindin-1 OS=Mus musculus GN=Nucb1 PE=1 SV=2	NUCB1_MOUSE	Nucb1 Nuc Nucb	12	11	9	6	11	10	7	7	8	3	5	7	19	15	9	9	13	8	6	8	10	8	5	4	1.9597	1.217	1.23729	0.209718	0.752	1.10811	2.1879	0.963
Q8QZR4	Out at first protein homolog OS=Mus musculus GN=Oaf PE=2 SV=1	OAF_MOUSE	Oaf D9Ucla1	6	8	4	2	2	2	5	3	5	2	3	4	10	5	5	6	5	4	4	5	5	4	2	5	2.28884	1.293	1.45833	0.130639	0.727	1.13636	2.24712	1.354
P09535	Insulin-like growth factor II OS=Mus musculus GN=Igf2 PE=1 SV=1	IGF2_MOUSE	Igf2 Igf-2	1	1	1	0	0	0	1	1	1	0	0	0	1	0	0	0	0	0	0	0	0	0	0	0	0.156178	-0.855	0.333333	0.247315	-1.334	0	0.729844	-1.614
P40936	Indolethylamine N-methyltransferase OS=Mus musculus GN=Inmt PE=1 SV=1	INMT_MOUSE	Inmt Temt	1	0	1	3	0	0	0	0	1	0	0	0	1	0	0	0	0	0	0	0	0	0	0	0	1.43368	-1.106	0.2	0.013572	-0.5	0	1.29322	-1.186
Q8K297	Procollagen galactosyltransferase 1 OS=Mus musculus GN=Colgalt1 PE=1 SV=2	GT251_MOUSE	Colgalt1 Glt25d1	0	1	0	0	0	0	1	1	1	1	0	1	0	0	0	0	0	0	0	0	0	1	0	0	0.00178472	-0.617	0	0.517002	-1.724	0.2	0.676037	-1.742
P50704	Alpha-defensin 24 OS=Mus musculus GN=Defa24 PE=3 SV=1	DEFA6_MOUSE	Defa6 Defcr6; Defa12 Defcr12	0	0	0	0	2	4	0	0	0	0	0	0	0	0	0	1	0	0	0	0	0	0	0	0	1.24906	-0.9	0.166667	0.166667	0	#DIV/0!	0.877147	-0.871
Q9R1P1	Proteasome subunit beta type-3 OS=Mus musculus GN=Psmb3 PE=1 SV=1	PSB3_MOUSE	Psmb3	3	3	3	3	2	2	1	0	0	0	0	0	2	1	1	1	1	2	0	0	0	0	0	0	2.02864	-2.681	0.5	0.000229531	-0.598	0	2.13019	-1.395
P16882	Isoform 2 of Growth hormone receptor OS=Mus musculus GN=Ghr	GHR_MOUSE	Ghr	0	3	0	0	0	3	2	5	4	4	5	7	0	0	0	4	3	0	0	0	0	4	4	5	0.0118357	0	1.16667	2.81428	-1.561	0.481481	1.37201	-0.887
Q62351	Transferrin receptor protein 1 OS=Mus musculus GN=Tfrc PE=1 SV=1	TFR1_MOUSE	Tfrc Trfr	33	34	24	13	30	26	13	16	7	6	9	9	21	28	18	17	21	24	4	15	7	6	9	10	2.35143	-1.047	0.80625	0.383681	-0.645	0.85	2.85462	-0.619
Q8R5M8	Isoform 5 of Cell adhesion molecule 1 OS=Mus musculus GN=Cadm1	CADM1_MOUSE	Cadm1 Igsf4 Necl2 Ra175 Syncam SynCam1 Tslc1	1	2	1	0	1	0	1	3	0	0	1	1	0	0	1	0	0	0	0	1	1	0	1	0	0.833909	-1.369	0.2	0.192527	-0.891	0.5	1.3103	-1.778
P20918	Plasminogen OS=Mus musculus GN=Plg PE=1 SV=3	PLMN_MOUSE	Plg	566	730	732	413	645	426	795	1187	1123	990	765	753	617	586	671	511	708	638	609	1049	1045	909	763	795	21.3871	1.25	1.06236	1.47116	-0.736	0.921076	5.2395	0.708
Q05909	Receptor-type tyrosine-protein phosphatase gamma OS=Mus musculus GN=Ptprg PE=1 SV=1	PTPRG_MOUSE	Ptprg	9	4	5	6	6	8	6	5	8	5	5	4	6	1	3	4	5	6	5	4	5	4	4	4	2.77098	-1.574	0.657895	0.165357	-0.926	0.787879	2.60938	-1.705
O70370	Cathepsin S OS=Mus musculus GN=Ctss PE=1 SV=2	CATS_MOUSE	Ctss Cats	5	0	1	2	1	1	2	1	0	0	1	0	5	0	1	1	1	0	5	4	4	1	1	0	0.169629	-0.36	0.8	3.85882	1.593	3.75	0.796026	0.689
P11352	Glutathione peroxidase 1 OS=Mus musculus GN=Gpx1 PE=1 SV=2	GPX1_MOUSE	Gpx1	7	6	5	9	8	7	2	7	5	8	4	4	6	7	4	6	8	3	4	3	3	3	2	3	0.726717	-1.023	0.809524	1.05191	-1.505	0.6	1.88108	-1.207
Q921I1	Serotransferrin OS=Mus musculus GN=Tf PE=1 SV=1	TRFE_MOUSE	Tf Trf	127	48	57	4	4	2	70	32	36	3	1	2	88	53	100	8	8	2	41	41	59	3	3	3	0.689546	0	1.07025	0.535759	0.146	1.04167	1.27665	0
Q9DCD0	6-phosphogluconate dehydrogenase, decarboxylating OS=Mus musculus GN=Pgd PE=1 SV=3	6PGD_MOUSE	Pgd	0	0	0	1	1	2	0	0	0	0	0	0	1	0	2	2	2	1	0	0	2	0	0	0	0.702939	1.125	2	0.0474549	0.696	#DIV/0!	1.03667	1.192
Q80YC5	Coagulation factor XII OS=Mus musculus GN=F12 PE=2 SV=2	FA12_MOUSE	F12	68	75	80	56	74	53	81	124	122	101	80	87	67	49	68	62	100	73	63	115	110	113	91	108	0.526049	0.634	1.03202	1.00655	1.535	1.0084	1.55885	1.266
P19157	Glutathione S-transferase P 1 OS=Mus musculus GN=Gstp1 PE=1 SV=2	GSTP1_MOUSE	Gstp1 Gstpib	1	0	1	0	0	0	0	0	0	0	0	0	2	0	3	1	0	0	1	0	0	0	0	0	1.10321	1.084	3	0.00913921	0.643	#DIV/0!	1.28102	1.225
P01664	Ig kappa chain V-III region PC 7210 OS=Mus musculus PE=1 SV=1	KV3AC_MOUSE	0	0	0	0	7	0	0	0	0	0	0	0	0	0	0	0	0	4	0	0	3	7	0	0	0	1.53651	-0.574	0.571429	3.4662	1.258	#DIV/0!	0.00695277	0
Q9D7Q1	Chitotriosidase-1 OS=Mus musculus GN=Chit1 PE=1 SV=2	CHIT1_MOUSE	Chit1	8	7	6	6	8	6	0	4	2	4	2	3	6	2	5	3	6	5	1	2	0	2	4	3	2.7519	-2.577	0.658537	0.00760276	-0.29	0.8	2.45496	-1.207
P10649	Glutathione S-transferase Mu 1 OS=Mus musculus GN=Gstm1 PE=1 SV=2	GSTM1_MOUSE	Gstm1	4	3	0	4	7	2	0	0	0	0	0	1	15	6	1	0	5	3	1	0	0	0	0	0	1.78583	0.657	1.5	0.0654597	0.115	1	1.66121	0.568
Q09200	Beta-1,4 N-acetylgalactosaminyltransferase 1 OS=Mus musculus GN=B4galnt1 PE=2 SV=1	B4GN1_MOUSE	B4galnt1 Galgt Galgt1 Ggm2	9	4	6	0	3	3	6	4	4	1	0	0	3	3	1	0	3	4	2	4	3	1	1	1	2.8981	-1.122	0.56	0.028858	-0.273	0.8	2.46466	-1.085
Q07079	Insulin-like growth factor-binding protein 5 OS=Mus musculus GN=Igfbp5 PE=1 SV=1	IBP5_MOUSE	Igfbp5 Igfbp-5	18	15	12	8	12	9	19	12	14	12	11	12	9	5	11	4	12	7	5	15	17	13	10	15	6.13122	-1.971	0.648649	0.0942257	-0.364	0.9375	4.15875	-1.786
P26262	Plasma kallikrein OS=Mus musculus GN=Klkb1 PE=1 SV=2	KLKB1_MOUSE	Klkb1 Klk3 Pk	145	194	170	103	173	100	246	367	336	277	240	232	155	179	151	120	182	139	163	285	249	264	254	226	3.8128	0.871	1.04633	7.57641	-2.961	0.848645	0.593266	-0.299
P21570	Angiogenin OS=Mus musculus GN=Ang PE=1 SV=1	ANGI_MOUSE	Ang Ang1 Rnase5 Rnase5a	3	2	0	0	0	1	1	1	1	0	1	1	4	1	2	0	1	0	3	1	4	0	1	2	0.034595	0	1.33333	1.24574	1.377	2.2	1.11583	1.06
P97333	Neuropilin-1 OS=Mus musculus GN=Nrp1 PE=1 SV=2	NRP1_MOUSE	Nrp1 Nrp	14	11	9	10	9	7	3	4	4	2	1	1	9	7	6	6	7	7	3	4	4	2	0	0	3.12215	-1.774	0.7	0.00719668	-0.098	0.866667	2.66022	-0.865
O88200	C-type lectin domain family 11 member A OS=Mus musculus GN=Clec11a PE=2 SV=1	CLC11_MOUSE	Clec11a Scgf	12	13	8	6	10	5	7	9	10	9	7	6	8	8	7	7	5	5	6	7	9	5	5	6	1.32745	-1.101	0.740741	0.335704	-1.482	0.791667	1.75997	-1.353
O09159	Lysosomal alpha-mannosidase OS=Mus musculus GN=Man2b1 PE=2 SV=4	MA2B1_MOUSE	Man2b1 Laman Man2b Manb	48	41	45	43	36	33	34	39	30	27	22	26	48	62	49	39	35	21	33	47	42	27	23	20	0.557633	0	1.03252	1.24371	0.79	1.07865	1.68309	0.48
P31725	Protein S100-A9 OS=Mus musculus GN=S100a9 PE=1 SV=3	S10A9_MOUSE	S100a9 Cagb Mrp14	6	2	3	0	3	3	6	6	7	8	7	8	7	7	6	4	1	1	9	8	6	9	9	6	2.41778	1.105	1.52941	0.44957	0.981	1.11905	2.51834	1.395
P06745	Glucose-6-phosphate isomerase OS=Mus musculus GN=Gpi PE=1 SV=4	G6PI_MOUSE	Gpi Gpi1	4	5	5	4	1	1	0	1	1	0	0	0	12	8	5	2	2	1	1	0	1	0	0	0	2.06666	0.862	1.5	0.0127378	0.282	1	2.0165	0.702
P26883	Peptidyl-prolyl cis-trans isomerase FKBP1A OS=Mus musculus GN=Fkbp1a PE=1 SV=2	FKB1A_MOUSE	Fkbp1a Fkbp1	2	1	1	1	0	0	2	1	1	0	0	0	1	0	1	0	0	0	0	0	1	0	0	0	0.550321	-1.064	0.4	0.276077	-0.945	0.25	1.22355	-1.522
P97812	Indian hedgehog protein OS=Mus musculus GN=Ihh PE=1 SV=2	IHH_MOUSE	Ihh	1	2	1	2	1	0	0	1	0	1	0	0	0	1	1	0	0	1	0	0	0	0	0	0	0.744497	-1.268	0.428571	0.0399631	-0.92	0	1.06242	-1.382
Q99M80	Isoform 5 of Receptor-type tyrosine-protein phosphatase T OS=Mus musculus GN=Ptprt	PTPRT_MOUSE	Ptprt	0	0	0	0	0	0	3	2	2	2	0	0	0	0	0	0	0	0	1	0	1	1	0	0	0.166667	0	#DIV/0!	0.818067	-1.207	0.333333	0.600423	-1.017
Q8CFG8	Complement C1s-B subcomponent OS=Mus musculus GN=C1sb PE=2 SV=1	CS1B_MOUSE	C1sb C1s Gm5077	44	44	33	31	39	33	33	44	51	28	29	33	37	43	32	29	50	35	23	47	0	29	31	26	0.0249991	0	1.00893	4.97373	-1.256	0.715596	1.5079	-0.618
P12804	Fibroleukin OS=Mus musculus GN=Fgl2 PE=1 SV=1	FGL2_MOUSE	Fgl2 Fiblp	6	6	2	3	2	2	5	6	7	4	4	5	7	2	1	1	3	0	4	4	5	4	2	3	1.36995	-0.87	0.666667	0.528983	-1.625	0.709677	2.05366	-1.457
Q64727	Vinculin OS=Mus musculus GN=Vcl PE=1 SV=4	VINC_MOUSE	Vcl	24	25	22	19	14	18	4	9	9	4	4	6	19	15	28	10	13	12	3	8	7	4	4	4	2.6891	-1.014	0.795082	0.0997322	-0.688	0.833333	2.78439	-0.606
Q3U1T9	DENN domain-containing protein 1A OS=Mus musculus GN=Dennd1a PE=1 SV=2	DEN1B_MOUSE	Dennd1b	0	3	5	0	3	1	0	0	0	0	0	0	0	0	2	2	0	1	0	0	0	0	0	0	0.90043	-0.866	0.416667	0.166667	0	#DIV/0!	0.725634	-0.74
O55234	Proteasome subunit beta type-5 OS=Mus musculus GN=Psmb5 PE=1 SV=3	PSB5_MOUSE	Psmb5	3	4	5	5	3	3	0	0	0	0	0	0	1	0	2	3	3	4	0	0	0	0	0	0	2.35606	-1.803	0.565217	0.166667	0	#DIV/0!	2.09674	-1.008
P11680	Properdin OS=Mus musculus GN=Cfp PE=2 SV=2	PROP_MOUSE	Cfp Pfc	51	60	56	21	55	46	131	135	163	117	91	86	90	47	33	27	67	43	176	124	114	107	106	93	1.16473	0	1.06228	3.52926	0.503	0.995851	4.73759	0.496
P29788	Vitronectin OS=Mus musculus GN=Vtn PE=1 SV=2	VTNC_MOUSE	Vtn	70	80	83	75	101	77	138	173	199	154	137	142	77	68	68	65	108	91	122	177	173	166	159	162	0.00018565	0	0.981481	2.29892	2.538	1.01697	1.40363	0.505
P70274	Selenoprotein P OS=Mus musculus GN=Sepp1 PE=2 SV=3	SEPP1_MOUSE	Sepp1 Selp	24	26	10	15	26	17	39	53	45	36	32	28	21	15	10	13	18	12	33	46	38	32	32	30	3.69869	-1.377	0.754237	0.0521851	-0.3	0.905579	1.99042	-0.86
Q9R0M4	Podocalyxin OS=Mus musculus GN=Podxl PE=1 SV=2	PODXL_MOUSE	Podxl Pclp1	5	6	3	3	3	1	4	7	2	5	2	1	0	2	1	2	3	2	0	3	4	3	3	5	3.39292	-1.895	0.47619	0.0304881	-0.336	0.857143	2.43076	-1.684
P21614	Vitamin D-binding protein OS=Mus musculus GN=Gc PE=1 SV=2	VTDB_MOUSE	Gc	542	714	850	544	861	621	1138	1541	1513	1424	1190	1086	719	479	719	594	975	736	1023	1494	1291	1298	1205	1145	6.73874	0.903	1.02178	0.0582153	0.108	0.944754	3.47583	0.311
Q99NH8	Isoform 2 of Triggering receptor expressed on myeloid cells 2 OS=Mus musculus GN=Trem2	TREM2_MOUSE	Trem2 Trem2a Trem2b Trem2c	1	1	1	1	0	0	1	0	0	0	0	0	3	1	1	1	0	1	4	0	0	0	0	0	0.409499	0.963	1.75	0.740651	0.684	4	1.46872	1.162
Q9JI02	Secretoglobin family 2B member 20 OS=Mus musculus GN=Scgb2b20 PE=2 SV=1	S2B20_MOUSE	Scgb2b20 Abpd	1	0	0	1	2	1	0	0	0	0	0	0	1	0	0	3	4	2	0	0	0	1	0	0	0.947607	1.023	2	0.00214747	0.557	#DIV/0!	1.03062	0.987
P16301	Phosphatidylcholine-sterol acyltransferase OS=Mus musculus GN=Lcat PE=1 SV=2	LCAT_MOUSE	Lcat	29	33	43	26	49	41	25	37	32	27	19	21	28	37	33	20	41	44	17	27	17	26	17	22	0.256153	-0.494	0.918552	1.66364	-1.793	0.782609	1.44369	-0.592
Q5BKQ4	Inactive pancreatic lipase-related protein 1 OS=Mus musculus GN=Pnliprp1 PE=2 SV=2	LIPR1_MOUSE	Pnliprp1	1	0	1	6	5	1	0	1	1	0	0	0	1	0	0	3	2	1	0	0	0	0	0	1	1.58978	-0.846	0.5	0.0319478	-0.245	0.5	1.43296	-0.803
P35330	Intercellular adhesion molecule 2 OS=Mus musculus GN=Icam2 PE=1 SV=1	ICAM2_MOUSE	Icam2 Icam-2	2	3	2	1	4	4	2	3	0	1	1	1	2	1	0	1	2	2	1	1	1	1	1	1	1.79458	-1.986	0.5	0.0107589	-0.531	0.75	1.62253	-1.689
Q8BWP8	N-acetyllactosaminide beta-1,3-N-acetylglucosaminyltransferase OS=Mus musculus GN=B3gnt1 PE=2 SV=1	B4GA1_MOUSE	B4gat1 B3gnt1 B3gnt6	0	0	0	0	0	0	1	1	2	1	3	1	2	0	2	0	1	1	1	2	2	2	2	1	2.71334	2.047	#DIV/0!	5.69546e-05	0.357	1.11111	1.35163	1.647
P05555	Isoform 2 of Integrin alpha-M OS=Mus musculus GN=Itgam	ITAM_MOUSE	Itgam	2	3	3	2	4	4	0	1	1	0	0	0	0	0	1	3	4	1	0	1	1	0	0	0	2.24523	-1.799	0.5	0.0748763	0.088	1	1.7334	-1.144
P01675	Ig kappa chain V-VI region SAPC 10 OS=Mus musculus PE=1 SV=1	KV6A1_MOUSE	0	0	0	0	1	0	0	0	0	0	0	0	0	0	0	3	2	0	0	0	0	0	0	0	0	1.26607	1.01	5	0.166667	0	#DIV/0!	0.887633	0.961
P01819	Ig heavy chain V region MOPC 141 OS=Mus musculus PE=4 SV=1	HVM43_MOUSE	0	0	0	0	0	0	0	1	0	0	0	0	0	0	0	0	0	0	0	0	0	1	4	0	0	0.166667	0	#DIV/0!	0.455402	0.762	5	0.297954	-0.598
O08807	Peroxiredoxin-4 OS=Mus musculus GN=Prdx4 PE=1 SV=1	PRDX4_MOUSE	Prdx4	0	0	0	0	0	0	0	0	1	0	0	0	1	1	1	0	0	0	0	1	1	0	0	0	0.756137	1.578	#DIV/0!	0.00156635	0.461	2	0.718561	1.655
Q9CZQ6	Retinoic acid early-inducible protein 1-epsilon OS=Mus musculus GN=Raet1e PE=1 SV=1	RAE1E_MOUSE	Raet1e	0	0	0	0	0	0	0	0	0	1	0	0	1	0	1	0	1	1	0	0	0	0	1	0	1.15863	2.092	#DIV/0!	0.10738	0.044	1	0.698838	1.613
P10605	Cathepsin B OS=Mus musculus GN=Ctsb PE=1 SV=2	CATB_MOUSE	Ctsb	29	33	34	36	42	31	19	17	16	16	14	17	51	32	33	18	37	38	27	21	20	15	17	14	0.127811	0	1.01951	2.0328	0.979	1.15152	1.22897	0.416
P97399	Dentin sialophosphoprotein OS=Mus musculus GN=Dspp PE=1 SV=2	DSPP_MOUSE	Dspp Dmp3	1	5	3	2	4	2	7	3	3	3	7	5	2	3	4	1	3	3	1	3	3	1	6	1	0.0208609	0	0.941176	2.91209	-1.56	0.535714	1.49483	-1.344
P09581	Macrophage colony-stimulating factor 1 receptor OS=Mus musculus GN=Csf1r PE=1 SV=3	CSF1R_MOUSE	Csf1r Csfmr Fms	47	47	49	27	39	27	54	65	74	49	36	37	65	47	38	33	45	33	71	48	52	50	46	41	2.48351	0.822	1.10593	1.08581	0.48	0.977778	3.55089	0.949
P97873	Lysyl oxidase homolog 1 OS=Mus musculus GN=Loxl1 PE=2 SV=3	LOXL1_MOUSE	Loxl1 Lox2 Loxl	1	1	0	1	1	0	1	1	0	0	0	1	0	0	0	1	0	0	0	0	0	1	0	0	0.435395	-1.159	0.25	0.0770222	-0.834	0.333333	0.795239	-1.564
P62259	14-3-3 protein epsilon OS=Mus musculus GN=Ywhae PE=1 SV=1	1433E_MOUSE	Ywhae	0	0	5	0	0	0	0	1	1	0	0	0	0	1	1	0	0	0	0	0	0	0	0	0	0.187495	-0.43	0.4	0.0221517	-0.885	0	0.428956	-0.663
Q9WVJ9	EGF-containing fibulin-like extracellular matrix protein 2 OS=Mus musculus GN=Efemp2 PE=2 SV=1	FBLN4_MOUSE	Efemp2 Fbln4 Mbp1	2	3	1	0	1	3	1	1	2	2	3	2	5	3	0	1	3	4	2	2	2	1	3	4	0.986097	0.969	1.6	0.179185	0.85	1.27273	1.31559	1.311
Q61398	Procollagen C-endopeptidase enhancer 1 OS=Mus musculus GN=Pcolce PE=1 SV=2	PCOC1_MOUSE	Pcolce Pcpe1	1	1	0	1	1	0	2	0	1	0	2	1	3	1	1	0	1	1	2	1	3	2	2	0	0.29902	0.839	1.75	0.315953	0.9	1.66667	0.887847	1.343
Q05793	Basement membrane-specific heparan sulfate proteoglycan core protein OS=Mus musculus GN=Hspg2 PE=1 SV=1	PGBM_MOUSE	Hspg2	12	10	14	2	6	8	13	17	15	5	7	5	6	4	8	6	10	7	4	12	8	9	8	8	1.01199	-0.84	0.788462	0.555786	-0.786	0.790323	1.71958	-1.202
Q64726	Zinc-alpha-2-glycoprotein OS=Mus musculus GN=Azgp1 PE=1 SV=2	ZA2G_MOUSE	Azgp1	68	73	72	64	76	65	90	116	134	140	116	109	61	68	56	67	72	66	76	96	99	126	115	111	0.273212	-0.426	0.933014	1.24871	-0.784	0.883688	1.44449	-0.725
Q6GQT1	Alpha-2-macroglobulin-P OS=Mus musculus GN=A2mp PE=2 SV=2	A2MP_MOUSE	A2mp A2m	81	74	61	27	54	29	26	46	27	17	33	25	42	66	45	15	64	16	20	53	44	16	24	33	11.7153	-0.96	0.760736	0.965535	0.612	1.09195	4.9101	-0.584
Q5MJS3	Extracellular serine/threonine protein kinase FAM20C OS=Mus musculus GN=Fam20c PE=2 SV=1	FA20C_MOUSE	Fam20c Dmp4 Kiaa4081	4	6	4	5	5	7	2	2	0	0	0	0	5	2	4	2	2	3	1	2	2	0	0	0	2.90182	-2.276	0.580645	0.000320072	0.251	1.25	2.06862	-1.016
O88947	Coagulation factor X OS=Mus musculus GN=F10 PE=1 SV=1	FA10_MOUSE	F10	48	74	76	48	79	55	59	94	105	81	83	81	67	65	68	58	86	63	58	94	86	74	88	89	2.71664	2.473	1.07105	0.160058	0.486	0.972167	2.19349	1.89
P62962	Profilin-1 OS=Mus musculus GN=Pfn1 PE=1 SV=2	PROF1_MOUSE	Pfn1	13	7	7	10	9	6	0	0	0	0	0	0	8	5	7	6	7	4	0	0	0	0	0	0	2.54288	-1.416	0.711538	0.166667	0	#DIV/0!	2.41413	-0.679
P07214	SPARC OS=Mus musculus GN=Sparc PE=1 SV=1	SPRC_MOUSE	Sparc	1	1	0	2	0	0	2	0	0	2	1	1	1	0	0	0	1	0	0	1	0	0	1	0	0.376366	-0.857	0.5	0.681203	-1.32	0.333333	1.46531	-1.649
Q8C310	Isoform 3 of Roundabout homolog 4 OS=Mus musculus GN=Robo4	ROBO4_MOUSE	Robo4	2	2	0	0	1	0	1	1	2	1	0	0	1	0	0	0	0	0	1	1	0	1	0	0	1.01038	-1.181	0.2	0.000338848	-0.404	0.6	0.849754	-1.304
P31428	Dipeptidase 1 OS=Mus musculus GN=Dpep1 PE=1 SV=2	DPEP1_MOUSE	Dpep1 Mbd1 Rdp	0	4	2	3	3	5	0	0	0	0	0	0	0	0	1	2	4	2	0	0	0	0	0	0	2.04166	-1.337	0.529412	0.166667	0	#DIV/0!	1.74715	-0.979
P35455	Vasopressin-neurophysin 2-copeptin OS=Mus musculus GN=Avp PE=2 SV=1	NEU2_MOUSE	Avp	0	3	0	0	0	0	0	3	5	2	2	2	0	0	2	0	0	0	1	1	1	0	3	1	0.0014109	-0.18	0.666667	0.574341	-1.103	0.5	0.586088	-0.849
P11859	Angiotensinogen OS=Mus musculus GN=Agt PE=1 SV=1	ANGT_MOUSE	Agt Serpina8	27	33	28	21	36	23	34	47	39	28	23	18	33	23	22	22	24	26	22	30	41	25	22	18	0.318995	-0.649	0.892857	0.817559	-0.761	0.835979	1.13092	-0.927
Q60692	Proteasome subunit beta type-6 OS=Mus musculus GN=Psmb6 PE=1 SV=3	PSB6_MOUSE	Psmb6 Lmp19	4	4	3	5	5	4	6	7	6	4	3	2	3	3	5	1	2	3	5	7	3	3	1	2	1.1694	-1.515	0.68	0.194645	-0.577	0.75	1.41059	-1.494
P63254	Cysteine-rich protein 1 OS=Mus musculus GN=Crip1 PE=1 SV=2	CRIP1_MOUSE	Crip1 Crip	3	6	6	1	0	1	3	1	2	3	0	0	2	4	7	2	0	0	0	0	0	1	0	0	0.00660987	0	0.882353	2.35818	-1.709	0.111111	0.676428	-0.559
Q9ESY9	Gamma-interferon-inducible lysosomal thiol reductase OS=Mus musculus GN=Ifi30 PE=1 SV=3	GILT_MOUSE	Ifi30 Gilt Ip30	3	1	3	1	3	0	0	0	0	0	0	0	6	1	5	3	3	0	0	0	0	0	0	0	1.74974	1.104	1.63636	0.166667	0	#DIV/0!	1.52172	0.831
O08710	Thyroglobulin OS=Mus musculus GN=Tg PE=1 SV=3	THYG_MOUSE	Tg Tgn	0	0	0	0	0	0	0	0	0	0	0	0	1	0	0	1	1	0	0	0	0	0	0	0	0.682167	1.514	#DIV/0!	0.166667	0	#DIV/0!	0.418998	1.364
O88852	Testis-specific Y-encoded-like protein 1 OS=Mus musculus GN=Tspyl1 PE=2 SV=1	TSYL1_MOUSE	Tspyl1 Tspyl	0	0	0	0	0	0	0	0	0	0	0	0	1	0	0	0	0	0	0	1	0	0	0	1	0.00566811	0.635	#DIV/0!	0.0645151	0.957	#DIV/0!	0.243978	1.293
P01632	Ig kappa chain V-I region S107A OS=Mus musculus GN=Igkv7-33 PE=4 SV=1	KV1A1_MOUSE	Igkv7-33	0	0	0	0	0	0	0	0	0	0	0	0	1	0	0	0	0	0	1	0	0	1	0	0	0.00566811	0.635	#DIV/0!	0.158617	1.026	#DIV/0!	0.3564	1.043
Q3URU2	Isoform 2 of Paternally-expressed gene 3 protein OS=Mus musculus GN=Peg3	PEG3_MOUSE	Peg3 Kiaa0287 Pw1	0	0	0	0	0	0	0	0	0	0	0	0	1	0	0	0	0	0	0	1	1	0	0	0	0.00566811	0.635	#DIV/0!	0.0450563	0.932	#DIV/0!	0.215873	1.293
Q7TN84	Synaptotagmin-14 OS=Mus musculus GN=Syt14 PE=2 SV=1	SYT14_MOUSE	Syt14	0	0	0	0	0	0	0	0	0	0	0	0	2	0	0	0	0	0	0	0	0	1	0	0	0.234584	0.777	#DIV/0!	0.00214747	0.557	#DIV/0!	0.340914	0.775
Q9QXS1	Isoform PLEC-1D,2A of Plectin OS=Mus musculus GN=Plec	PLEC_MOUSE	Plec Plec1	0	0	0	0	0	0	0	0	0	0	0	0	1	1	0	0	0	0	0	0	0	0	1	0	0.257041	1.096	#DIV/0!	0.000723373	0.571	#DIV/0!	0.375534	1.045
P41160	Leptin OS=Mus musculus GN=Lep PE=2 SV=1	LEP_MOUSE	Lep Ob	0	0	0	0	0	0	0	0	0	0	0	0	0	1	0	0	1	0	0	0	0	0	0	1	0.162645	1.031	#DIV/0!	0.000907433	0.569	#DIV/0!	0.284892	1.316
Q60605	Isoform Smooth muscle of Myosin light polypeptide 6 OS=Mus musculus GN=Myl6	MYL6_MOUSE	Myl6 Myln	0	0	0	0	0	0	0	0	0	0	0	0	0	1	2	0	0	0	0	0	0	0	0	0	0.771312	1.158	#DIV/0!	0.166667	0	#DIV/0!	0.477312	1.11
P26039	Talin-1 OS=Mus musculus GN=Tln1 PE=1 SV=2	TLN1_MOUSE	Tln1 Tln	0	0	0	0	0	0	0	0	0	0	0	0	0	0	1	0	0	0	0	0	2	0	0	0	0.00753942	0.641	#DIV/0!	0.0474549	0.696	#DIV/0!	0.22677	0.638
P40630	Isoform Nuclear of Transcription factor A, mitochondrial OS=Mus musculus GN=Tfam	TFAM_MOUSE	Tfam Hmgts	0	0	0	0	0	0	0	0	0	0	0	0	0	0	0	2	1	0	0	0	0	0	0	0	0.811781	1.064	#DIV/0!	0.166667	0	#DIV/0!	0.503977	1.035
P47811	Isoform 4 of Mitogen-activated protein kinase 14 OS=Mus musculus GN=Mapk14	MK14_MOUSE	Mapk14 Crk1 Csbp1 Csbp2	0	0	0	0	0	0	0	0	0	0	0	0	0	0	0	1	0	0	0	0	0	2	0	0	0.0299725	0.681	#DIV/0!	0.0738612	0.716	#DIV/0!	0.326575	0.678
Q5NBU8	XIAP-associated factor 1 OS=Mus musculus GN=Xaf1 PE=2 SV=3	XAF1_MOUSE	Xaf1 Birc4bp Xiapaf1	0	0	0	0	0	0	0	0	0	0	0	0	0	0	0	1	0	0	1	1	0	0	0	0	0.0299725	0.681	#DIV/0!	0.134972	1	#DIV/0!	0.407719	1.349
Q9QUM0	Integrin alpha-IIb OS=Mus musculus GN=Itga2b PE=2 SV=2	ITA2B_MOUSE	Itga2b	0	0	0	0	0	0	0	0	0	0	0	0	0	0	0	2	0	1	0	0	0	0	0	0	0.961406	1.133	#DIV/0!	0.166667	0	#DIV/0!	0.603541	1.093
P09041	Phosphoglycerate kinase 1 OS=Mus musculus GN=Pgk1 PE=1 SV=4	PGK2_MOUSE	Pgk2 Pgk-2	0	0	0	0	0	0	0	0	0	0	0	0	0	0	0	0	2	0	0	0	0	0	0	1	0.0734802	0.717	#DIV/0!	0.000907433	0.569	#DIV/0!	0.191318	1.027
P50405	Pulmonary surfactant-associated protein B OS=Mus musculus GN=Sftpb PE=2 SV=1	PSPB_MOUSE	Sftpb Sftp3	0	0	0	0	0	0	0	0	0	0	0	0	0	0	0	0	3	0	0	0	0	0	0	0	0.308657	0.792	#DIV/0!	0.166667	0	#DIV/0!	0.182092	0.79
Q09098	Prostate and testis expressed protein 4 OS=Mus musculus GN=Pate4 PE=1 SV=3	PATE4_MOUSE	Pate4 Svs7	0	0	0	0	0	0	0	0	0	0	0	0	0	0	0	0	3	0	0	0	0	0	0	0	0.308657	0.792	#DIV/0!	0.166667	0	#DIV/0!	0.182092	0.79
Q64356	Seminal vesicle secretory protein 6 OS=Mus musculus GN=Svs6 PE=2 SV=1	SVS6_MOUSE	Svs6 Svp6	0	0	0	0	0	0	0	0	0	0	0	0	0	0	0	0	2	0	0	0	0	0	1	0	0.0734802	0.717	#DIV/0!	0.000723373	0.571	#DIV/0!	0.193141	1.027
O35711	Isoform 4 of Liprin-beta-2 OS=Mus musculus GN=Ppfibp2	LIPB2_MOUSE	Ppfibp2 Cclp1	0	0	0	0	0	0	0	0	0	0	0	0	0	0	0	0	0	1	0	0	0	0	1	1	0.00414868	0.629	#DIV/0!	0.0920289	0.99	#DIV/0!	0.272281	0.986
P01724	Ig lambda-1 chain V region S178 OS=Mus musculus PE=1 SV=1	LV1B_MOUSE	0	0	0	0	0	0	0	0	0	0	0	0	0	0	0	0	0	0	1	0	0	0	0	2	0	0.00414868	0.629	#DIV/0!	0.0937667	0.727	#DIV/0!	0.274406	0.986
P01821	Ig heavy chain V region MC101 OS=Mus musculus PE=1 SV=1	HVM45_MOUSE	0	0	0	0	0	0	0	0	0	0	0	0	0	0	0	0	0	0	0	1	0	0	0	2	0	0.166667	0	#DIV/0!	0.491142	1.144	#DIV/0!	0.296192	0.997
Q9QZ25	Vascular non-inflammatory molecule 3 OS=Mus musculus GN=Vnn3 PE=1 SV=3	VNN3_MOUSE	Vnn3	0	0	0	0	0	0	0	0	0	0	0	0	0	0	0	0	0	0	1	1	1	0	0	0	0.166667	0	#DIV/0!	0.383778	1.396	#DIV/0!	0.228634	1.94
P54729	NEDD8 ultimate buster 1 OS=Mus musculus GN=Nub1 PE=1 SV=2	NUB1_MOUSE	Nub1 Nyren18	0	0	0	0	0	0	0	0	0	0	0	0	0	0	0	0	0	0	0	2	1	0	0	0	0.166667	0	#DIV/0!	0.223903	1.025	#DIV/0!	0.130408	0.99
Q9CWS1	E3 ubiquitin-protein ligase RNF135 OS=Mus musculus GN=Rnf135 PE=2 SV=1	RN135_MOUSE	Rnf135	0	0	0	0	0	0	0	0	0	0	0	0	0	0	0	0	0	0	0	2	1	0	0	0	0.166667	0	#DIV/0!	0.223903	1.025	#DIV/0!	0.130408	0.99
Q9QZQ1	Isoform 1 of Afadin OS=Mus musculus GN=Mllt4	AFAD_MOUSE	Mllt4 Af6	0	0	0	0	0	0	0	0	0	0	0	0	0	0	0	0	0	0	0	1	0	1	1	0	0.166667	0	#DIV/0!	0.294966	1.391	#DIV/0!	0.17368	0.529
Q69ZS8	Isoform 3 of Kazrin OS=Mus musculus GN=Kazn	KAZRN_MOUSE	Kazn Kaz Kiaa1026	0	0	0	0	0	0	0	0	0	0	0	0	0	0	0	0	0	0	0	0	2	0	1	0	0.166667	0	#DIV/0!	0.274357	1.063	#DIV/0!	0.161062	0.534
Q8BGZ7	Keratin, type II cytoskeletal 75 OS=Mus musculus GN=Krt75 PE=1 SV=1	K2C75_MOUSE	Krt75 Kb18	0	0	0	0	0	0	0	0	0	0	0	0	0	0	0	0	0	0	0	0	0	0	3	0	0.166667	0	#DIV/0!	0.363641	0.8	#DIV/0!	0.216095	0.534
Q8BFX3	Isoform 2 of BTB/POZ domain-containing protein KCTD3 OS=Mus musculus GN=Kctd3	KCTD3_MOUSE	Kctd3	0	0	0	0	0	0	0	0	0	0	0	0	0	0	0	0	0	0	0	0	0	0	0	3	0.166667	0	#DIV/0!	0.354424	0.798	#DIV/0!	0.210371	0.534
P39039	Mannose-binding protein A OS=Mus musculus GN=Mbl1 PE=2 SV=1	MBL1_MOUSE	Mbl1	30	38	34	15	22	13	90	132	122	113	107	114	30	38	33	25	33	21	53	87	90	118	103	112	4.03356	1.146	1.18421	5.13613	-1.508	0.830383	0.782249	-0.215
P00687	Alpha-amylase 1 OS=Mus musculus GN=Amy1 PE=1 SV=2	AMY1_MOUSE	Amy1 Amy-1-a Amy1a	40	36	40	35	41	40	21	42	43	31	29	26	44	31	24	34	54	41	28	43	34	39	41	28	0.00767299	0	0.982759	2.70567	2.196	1.10938	0.881386	0.587
O89017	Legumain OS=Mus musculus GN=Lgmn PE=1 SV=1	LGMN_MOUSE	Lgmn Prsc1	0	3	3	0	1	0	0	0	0	0	0	0	5	0	3	0	3	1	0	1	0	0	0	0	1.02091	0.816	1.71429	0.0068583	0.529	#DIV/0!	1.0773	0.807
P07146	Anionic trypsin-2 OS=Mus musculus GN=Prss2 PE=2 SV=1	TRY2_MOUSE	Prss2 Try2	0	1	1	0	0	0	1	1	4	3	1	2	0	0	0	0	0	0	2	1	1	1	1	1	0.158017	-1.044	0	0.213271	-0.937	0.583333	0.608178	-1.073
P16125	L-lactate dehydrogenase B chain OS=Mus musculus GN=Ldhb PE=1 SV=2	LDHB_MOUSE	Ldhb Ldh-2 Ldh2	4	5	4	2	4	3	0	1	3	0	0	0	5	3	2	4	5	6	1	4	3	2	0	0	0.196303	0.796	1.13636	1.30038	1.295	2.5	1.0844	0.874
Q8CG16	Complement C1r-A subcomponent OS=Mus musculus GN=C1ra PE=1 SV=1	C1RA_MOUSE	C1ra C1r	66	74	81	67	96	64	80	97	110	93	78	96	72	59	73	73	98	65	66	113	111	95	96	89	0.0432009	0	0.982143	1.23818	1.503	1.02888	0.901348	1.09
P70232	Isoform 2 of Neural cell adhesion molecule L1-like protein OS=Mus musculus GN=Chl1	NCHL1_MOUSE	Chl1 Call	2	1	0	0	1	0	0	0	1	0	0	0	0	1	0	0	0	0	0	0	0	0	0	0	0.498157	-0.956	0.25	0.013572	-0.5	0	0.528408	-1.083
Q9JMH9	Isoform 6 of Unconventional myosin-XVIIIa OS=Mus musculus GN=Myo18a	MY18A_MOUSE	Myo18a Myspdz	1	0	1	0	0	0	0	0	0	0	2	1	0	0	0	0	0	0	0	0	0	0	0	1	0.227825	-1.073	0	0.108836	-0.699	0.333333	0.640076	-1.344
E9Q7X6	Isoform 3 of Protein HEG homolog 1 OS=Mus musculus GN=Heg1	HEG1_MOUSE	Heg1	0	0	5	0	0	0	0	0	0	0	0	0	0	0	1	0	0	0	0	0	0	0	0	0	0.668309	-0.651	0.2	0.166667	0	#DIV/0!	0.449653	-0.651
Q99J39	Isoform Cytoplasmic+peroxisomal of Malonyl-CoA decarboxylase, mitochondrial OS=Mus musculus GN=Mlycd	DCMC_MOUSE	Mlycd	0	0	2	0	3	0	0	0	0	0	0	0	0	0	1	0	0	0	0	0	0	0	0	0	0.507329	-0.878	0.2	0.166667	0	#DIV/0!	0.33753	-0.839
Q00941	Granulocyte-macrophage colony-stimulating factor receptor subunit alpha OS=Mus musculus GN=Csf2ra PE=2 SV=2	CSF2R_MOUSE	Csf2ra Csfgmra	0	0	0	1	0	0	0	0	1	1	1	1	0	0	0	0	0	0	0	0	0	0	1	0	0.0244441	-0.673	0	0.241131	-1.192	0.25	0.508003	-1.448
P70281	Synaptonemal complex protein 3 OS=Mus musculus GN=Sycp3 PE=1 SV=1	SYCP3_MOUSE	Sycp3 Scp3	0	0	0	0	0	0	0	1	1	1	0	2	0	0	0	0	0	0	0	0	0	0	1	0	0.166667	0	#DIV/0!	0.475333	-1.219	0.2	0.30915	-1.094
Q8K0D2	Isoform 2 of Hyaluronan-binding protein 2 OS=Mus musculus GN=Habp2	HABP2_MOUSE	Habp2 Phbp	47	46	25	27	42	28	34	47	39	35	38	36	42	31	21	25	38	34	25	36	36	35	29	37	1.16755	-0.625	0.888372	0.76311	-1.486	0.864629	2.02145	-0.959
Q63880	Isoform 2 of Carboxylesterase 3A OS=Mus musculus GN=Ces3a	EST3A_MOUSE	Ces3a Es31	4	4	6	6	4	5	1	1	2	1	2	2	0	1	1	5	6	5	0	1	1	4	1	1	2.44922	-1.434	0.62069	6.78115e-06	-0.25	0.888889	2.13302	-1.077
Q61805	Lipopolysaccharide-binding protein OS=Mus musculus GN=Lbp PE=1 SV=2	LBP_MOUSE	Lbp	17	14	9	9	11	8	6	6	4	2	2	1	22	9	12	6	11	14	10	5	8	2	1	2	0.231344	0	1.08824	1.41029	0.763	1.33333	1.11565	0.478
P21180	Complement C2 OS=Mus musculus GN=C2 PE=2 SV=2	CO2_MOUSE	C2	54	43	48	38	70	53	20	30	28	20	35	31	47	43	37	27	69	43	20	28	28	24	21	26	2.75337	-1.39	0.869281	0.25554	-0.515	0.896341	2.88386	-0.598
Q8VCS0	N-acetylmuramoyl-L-alanine amidase OS=Mus musculus GN=Pglyrp2 PE=1 SV=1	PGRP2_MOUSE	Pglyrp2 Pglyrpl Pgrpl	24	34	27	20	30	18	22	40	41	38	33	37	42	35	23	21	35	28	22	34	35	36	34	35	4.36481	1.617	1.20261	0.0128757	-0.232	0.92891	1.94764	1.286
P82198	Transforming growth factor-beta-induced protein ig-h3 OS=Mus musculus GN=Tgfbi PE=2 SV=1	BGH3_MOUSE	Tgfbi	15	13	17	10	15	10	4	6	5	2	2	1	11	8	14	9	8	10	4	4	7	1	1	2	1.97009	-1.627	0.75	0.000342469	0.131	0.95	1.44642	-0.588
Q91V80	Apolipoprotein F OS=Mus musculus GN=Apof PE=2 SV=2	APOF_MOUSE	Apof Lvif	5	2	3	4	3	1	2	1	2	0	3	2	7	2	3	2	2	6	2	3	2	1	3	4	0.256404	0.517	1.22222	0.473415	1.117	1.5	0.855022	0.862
O08742	Platelet glycoprotein V OS=Mus musculus GN=Gp5 PE=2 SV=1	GPV_MOUSE	Gp5	1	3	2	1	1	0	0	0	0	0	0	0	0	0	0	0	4	2	0	0	2	1	3	2	0.230678	-0.592	0.75	2.84628	2.092	#DIV/0!	0.249328	0.597
Q8CG14	Complement C1s-A subcomponent OS=Mus musculus GN=C1sa PE=2 SV=2	CS1A_MOUSE	C1sa C1s	81	83	74	54	91	67	70	94	102	79	69	76	76	85	67	60	109	82	55	101	84	74	86	69	1.7552	1.137	1.06444	0.00908364	0.185	0.957143	1.16232	0.73
Q9CQW3	Vitamin K-dependent protein Z OS=Mus musculus GN=Proz PE=1 SV=1	PROZ_MOUSE	Proz	56	58	47	38	46	42	69	75	68	71	71	64	61	52	45	34	58	67	52	88	49	71	58	82	2.07011	0.907	1.10453	0.0013145	0	0.956938	1.02092	0.696
B1AY13	Ubiquitin carboxyl-terminal hydrolase 24 OS=Mus musculus GN=Usp24 PE=1 SV=1	UBP24_MOUSE	Usp24	1	0	0	0	0	0	1	0	0	1	0	0	0	0	0	0	0	0	0	0	0	0	0	0	0.0176909	-0.663	0	0.0988944	-0.991	0	0.330274	-1.332
O08749	Dihydrolipoyl dehydrogenase, mitochondrial OS=Mus musculus GN=Dld PE=1 SV=2	DLDH_MOUSE	Dld	1	1	0	0	1	0	0	0	0	0	0	0	0	0	0	0	0	0	0	0	0	0	0	0	0.593856	-1.5	0	0.166667	0	#DIV/0!	0.36184	-1.35
O88393	Transforming growth factor beta receptor type 3 OS=Mus musculus GN=Tgfbr3 PE=1 SV=1	TGBR3_MOUSE	Tgfbr3	2	0	0	0	1	0	0	0	0	0	0	0	0	0	0	0	0	0	0	0	0	0	0	0	0.706743	-1.067	0	0.166667	0	#DIV/0!	0.435015	-1.035
P07147	5,6-dihydroxyindole-2-carboxylic acid oxidase OS=Mus musculus GN=Tyrp1 PE=1 SV=1	TYRP1_MOUSE	Tyrp1 Tyrp-1	1	1	0	0	0	0	1	0	0	0	0	0	0	0	0	0	0	0	0	0	0	0	0	0	0.256243	-1.091	0	0.000229531	-0.598	0	0.407305	-1.378
P07356	Annexin A2 OS=Mus musculus GN=Anxa2 PE=1 SV=2	ANXA2_MOUSE	Anxa2 Anx2 Cal1h	3	0	0	0	0	0	0	0	0	0	0	0	0	0	0	0	0	0	0	0	0	0	0	0	0.942448	-0.855	0	0.166667	0	#DIV/0!	0.590845	-0.854
P12960	Contactin-1 OS=Mus musculus GN=Cntn1 PE=1 SV=1	CNTN1_MOUSE	Cntn1	1	1	0	0	0	0	1	0	0	0	0	0	0	0	0	0	0	0	0	0	0	0	0	0	0.256243	-1.091	0	0.000229531	-0.598	0	0.407305	-1.378
P15949	Kallikrein 1-related peptidase b9 OS=Mus musculus GN=Klk1b9 PE=2 SV=1	K1KB9_MOUSE	Klk1b9 Egfbp3 Klk-9 Klk9	3	0	0	0	0	0	0	0	0	0	0	0	0	0	0	0	0	0	0	0	0	0	0	0	0.942448	-0.855	0	0.166667	0	#DIV/0!	0.590845	-0.854
P19070	Complement receptor type 2 OS=Mus musculus GN=Cr2 PE=2 SV=1	CR2_MOUSE	Cr2	1	1	0	1	0	0	0	0	0	0	0	0	0	0	0	0	0	0	0	0	0	0	0	0	0.849287	-1.589	0	0.166667	0	#DIV/0!	0.528793	-1.418
Q05117	Tartrate-resistant acid phosphatase type 5 OS=Mus musculus GN=Acp5 PE=2 SV=2	PPA5_MOUSE	Acp5 T5ap Trap	1	1	0	0	0	0	0	0	1	0	0	0	0	0	0	0	0	0	0	0	0	0	0	0	0.256243	-1.091	0	0.013572	-0.5	0	0.310943	-1.307
Q64434	Protein-tyrosine kinase 6 OS=Mus musculus GN=Ptk6 PE=1 SV=1	PTK6_MOUSE	Ptk6 Sik	1	0	0	0	0	0	0	0	0	1	1	0	0	0	0	0	0	0	0	0	0	0	0	0	0.0176909	-0.663	0	0.0870503	-0.982	0	0.314727	-1.323
Q8BLK3	Limbic system-associated membrane protein OS=Mus musculus GN=Lsamp PE=1 SV=1	LSAMP_MOUSE	Lsamp	1	0	0	0	0	0	1	0	1	0	0	0	0	0	0	0	0	0	0	0	0	0	0	0	0.0176909	-0.663	0	0.0705097	-0.95	0	0.291935	-1.297
Q8CEF9	Transmembrane protein 132C OS=Mus musculus GN=Tmem132c PE=2 SV=3	T132C_MOUSE	Tmem132c	1	1	1	0	0	0	0	0	0	0	0	0	0	0	0	0	0	0	0	0	0	0	0	0	0.655407	-1.534	0	0.166667	0	#DIV/0!	0.401612	-1.375
Q9Z1W8	Potassium-transporting ATPase alpha chain 2 OS=Mus musculus GN=Atp12a PE=1 SV=3	AT12A_MOUSE	Atp12a Atp1al1	1	0	0	0	0	0	2	0	0	0	0	0	0	0	0	0	0	0	0	0	0	0	0	0	0.0176909	-0.663	0	0.144456	-0.749	0	0.385962	-1.118
P48725	Isoform 2 of Pericentrin OS=Mus musculus GN=Pcnt	PCNT_MOUSE	Pcnt Pcnt2	0	1	1	0	1	0	0	0	0	0	0	0	0	0	0	0	0	0	0	0	0	0	0	0	0.451367	-1.47	0	0.166667	0	#DIV/0!	0.27103	-1.321
Q9JKV7	Exostosin-like 1 OS=Mus musculus GN=Extl1 PE=2 SV=2	EXTL1_MOUSE	Extl1	0	1	0	1	0	1	0	0	0	0	0	0	0	0	0	0	0	0	0	0	0	0	0	0	0.783504	-1.573	0	0.166667	0	#DIV/0!	0.485333	-1.406
Q4VC17	A disintegrin and metalloproteinase with thrombospondin motifs 18 OS=Mus musculus GN=Adamts18 PE=2 SV=2	ATS18_MOUSE	Adamts18	0	0	1	0	0	1	0	1	0	0	0	0	0	0	0	0	0	0	0	0	0	0	0	0	0.188974	-1.059	0	0.0128422	-0.503	0	0.255575	-1.291
Q4VA45	Uncharacterized protein C11orf95 homolog OS=Mus musculus PE=2 SV=2	CK095_MOUSE	0	0	0	0	1	0	0	0	1	0	1	0	0	0	0	0	0	0	0	0	0	0	0	0	0	0.0244441	-0.673	0	0.0399631	-0.92	0	0.260555	-1.265
P35546	Isoform 2 of Proto-oncogene tyrosine-protein kinase receptor Ret OS=Mus musculus GN=Ret	RET_MOUSE	Ret	0	0	0	0	2	1	0	0	0	0	0	0	0	0	0	0	0	0	0	0	0	0	0	0	0.442483	-1.138	0	0.166667	0	#DIV/0!	0.265431	-1.086
Q9R0I7	YLP motif-containing protein 1 OS=Mus musculus GN=Ylpm1 PE=2 SV=2	YLPM1_MOUSE	Ylpm1 Zap Zap3	0	0	0	0	0	1	0	0	1	0	0	1	0	0	0	0	0	0	0	0	0	0	0	0	0.00715955	-0.64	0	0.062066	-0.944	0	0.246687	-1.284
A2AAY5	SH3 and PX domain-containing protein 2B OS=Mus musculus GN=Sh3pxd2b PE=1 SV=1	SPD2B_MOUSE	Sh3pxd2b Fad49 Tks4	0	0	0	0	0	0	1	0	0	2	0	0	0	0	0	0	0	0	0	0	0	0	0	0	0.166667	0	#DIV/0!	0.341287	-1.093	0	0.202229	-1.05
O70200	Allograft inflammatory factor 1 OS=Mus musculus GN=Aif1 PE=1 SV=1	AIF1_MOUSE	Aif1 Iba1	0	0	0	0	0	0	0	1	0	1	1	0	0	0	0	0	0	0	0	0	0	0	0	0	0.166667	0	#DIV/0!	0.275044	-1.368	0	0.161482	-1.243
Q6P5U8	Coiled-coil domain-containing protein 148 OS=Mus musculus GN=Ccdc148 PE=2 SV=1	CC148_MOUSE	Ccdc148	0	0	0	0	0	0	0	1	2	0	0	0	0	0	0	0	0	0	0	0	0	0	0	0	0.166667	0	#DIV/0!	0.150269	-0.986	0	0.0863403	0.645
E9Q555	E3 ubiquitin-protein ligase RNF213 OS=Mus musculus GN=Rnf213 PE=2 SV=1	RN213_MOUSE	Rnf213	0	0	0	0	0	0	0	0	1	2	0	0	0	0	0	0	0	0	0	0	0	0	0	0	0.166667	0	#DIV/0!	0.228454	-0.998	0	0.133159	-0.968
P08101	Low affinity immunoglobulin gamma Fc region receptor III OS=Mus musculus GN=Fcgr3 PE=1 SV=1	FCGR2_MOUSE	Fcgr2 Fcgr2b Ly-17	1	2	2	0	0	1	2	1	2	0	0	0	1	2	0	0	0	0	0	1	1	0	0	0	0.267011	-0.74	0.5	0.217344	-0.846	0.4	0.780181	-1.172
Q04447	Creatine kinase B-type OS=Mus musculus GN=Ckb PE=1 SV=1	KCRB_MOUSE	Ckb Ckbb	1	0	0	4	1	0	1	1	1	0	1	1	0	0	0	0	1	1	2	1	0	0	0	0	1.50008	-0.938	0.333333	0.00106462	-0.334	0.6	1.21937	-1.046
Q9WVA4	Transgelin-2 OS=Mus musculus GN=Tagln2 PE=1 SV=4	TAGL2_MOUSE	Tagln2 Kiaa0120	2	1	0	6	1	1	0	0	0	0	0	0	4	0	1	0	0	0	0	0	0	0	0	0	2.09675	-0.872	0.454545	0.166667	0	#DIV/0!	1.71018	-0.805
Q9DA19	Corepressor interacting with RBPJ 1 OS=Mus musculus GN=Cir1 PE=1 SV=2	CIR1_MOUSE	Cir1 Cir	3	3	2	4	3	3	1	0	0	0	0	0	2	3	0	1	2	3	0	0	0	0	0	0	1.40057	-1.596	0.611111	0.000229531	-0.598	0	1.54547	-1.029
Q01705	Isoform 4 of Neurogenic locus notch homolog protein 1 OS=Mus musculus GN=Notch1	NOTC1_MOUSE	Notch1 Motch	4	2	2	1	1	1	1	1	2	0	0	0	2	0	2	1	0	0	1	0	2	0	0	0	1.36187	-1.205	0.454545	0.0425265	-0.093	0.75	1.01896	-1.041
O35516	Isoform 2 of Neurogenic locus notch homolog protein 2 OS=Mus musculus GN=Notch2	NOTC2_MOUSE	Notch2	8	5	2	2	3	1	2	1	0	1	2	2	5	0	3	2	2	2	2	1	0	0	1	1	1.16173	-0.786	0.666667	0.109241	-0.64	0.625	1.46812	-0.865
P28063	Proteasome subunit beta type-8 OS=Mus musculus GN=Psmb8 PE=1 SV=2	PSB8_MOUSE	Psmb8 Lmp7 Mc13	5	3	4	3	5	7	0	1	1	0	0	0	3	1	3	1	3	3	1	2	1	1	0	0	3.813	-2.428	0.518519	0.370234	1.236	2.5	1.91547	-1.022
Q62356	Follistatin-related protein 1 OS=Mus musculus GN=Fstl1 PE=1 SV=2	FSTL1_MOUSE	Fstl1 Frp Fstl Tsc36	4	5	7	3	2	4	0	3	1	0	0	0	4	1	4	1	2	2	2	2	0	0	1	0	2.56704	-1.873	0.56	0.103216	0.548	1.25	1.32705	-0.894
Q64739	Isoform 6 of Collagen alpha-2(XI) chain OS=Mus musculus GN=Col11a2	COBA2_MOUSE	Col11a2	3	4	3	2	1	2	3	2	2	2	3	2	1	2	3	2	1	0	0	1	2	4	2	1	0.866704	-1.221	0.6	0.302718	-0.923	0.714286	1.41357	-1.594
Q9JKF6	Nectin-1 OS=Mus musculus GN=Pvrl1 PE=1 SV=3	PVRL1_MOUSE	Pvrl1 Hvec Prr1	5	7	1	4	2	3	1	2	2	1	0	1	4	2	2	2	2	1	0	1	1	1	2	1	2.09275	-1.369	0.590909	0.0183164	-0.169	0.857143	1.69053	-1.059
Q9Z0L8	Isoform II of Gamma-glutamyl hydrolase OS=Mus musculus GN=Ggh	GGH_MOUSE	Ggh	6	5	4	5	5	2	3	3	5	2	2	2	11	7	7	3	4	3	2	4	6	2	3	2	1.10526	0.902	1.2963	0.0582249	0.624	1.11765	1.20321	0.862
Q8VCP9	C-type lectin domain family 14 member A OS=Mus musculus GN=Clec14a PE=2 SV=2	CLC14_MOUSE	Clec14a	1	0	0	1	0	0	0	0	0	0	0	0	2	1	0	2	0	1	0	0	0	0	0	0	0.969721	1.21	3	0.166667	0	#DIV/0!	0.712091	1.038
P48758	Carbonyl reductase [NADPH] 1 OS=Mus musculus GN=Cbr1 PE=1 SV=3	CBR1_MOUSE	Cbr1 Cbr	0	1	0	1	0	0	0	0	0	0	0	0	2	1	2	1	0	0	0	0	0	0	0	0	1.03013	1.328	3	0.166667	0	#DIV/0!	0.751178	1.118
P01680	Ig kappa chain V-IV region S107B OS=Mus musculus PE=4 SV=1	KV4A1_MOUSE	0	0	0	0	0	0	0	0	0	0	0	2	0	2	1	0	0	1	0	2	0	0	0	0	0	1.19764	1.484	#DIV/0!	0.0193335	0.141	1	0.801214	1.113
O09043	Napsin-A OS=Mus musculus GN=Napsa PE=1 SV=1	NAPSA_MOUSE	Napsa Kdap Nap	6	3	3	3	5	3	4	4	4	5	3	2	6	3	3	3	4	5	3	8	7	5	4	4	0.00549504	0	1.04348	1.07811	2.051	1.40909	0.726638	1.325
Q00560	Interleukin-6 receptor subunit beta OS=Mus musculus GN=Il6st PE=1 SV=2	IL6RB_MOUSE	Il6st	7	9	4	2	1	2	3	1	2	1	1	2	5	3	3	3	3	2	1	1	2	0	0	1	0.589559	-0.644	0.76	0.614806	-1.294	0.5	1.36899	-0.832
Q07113	Cation-independent mannose-6-phosphate receptor OS=Mus musculus GN=Igf2r PE=1 SV=1	MPRI_MOUSE	Igf2r	8	10	6	2	4	3	0	0	2	0	0	0	3	2	9	2	4	3	0	1	0	0	0	0	1.39411	-0.854	0.69697	0.0183373	-0.266	0.5	1.40916	-0.62
Q61171	Peroxiredoxin-2 OS=Mus musculus GN=Prdx2 PE=1 SV=3	PRDX2_MOUSE	Prdx2 Tdpx1 Tpx	8	12	10	8	9	5	2	5	7	4	2	3	7	7	8	6	8	5	2	3	5	2	3	2	0.875211	-1.389	0.788462	0.163601	-0.888	0.73913	1.19149	-0.791
O55134	Protocadherin-12 OS=Mus musculus GN=Pcdh12 PE=2 SV=2	PCD12_MOUSE	Pcdh12	3	2	3	2	1	3	2	1	1	0	1	1	2	0	1	2	2	2	1	0	1	0	1	0	0.778639	-1.359	0.642857	0.150263	-0.865	0.5	1.19856	-1.306
P37889	Isoform 2 of Fibulin-2 OS=Mus musculus GN=Fbln2	FBLN2_MOUSE	Fbln2	5	2	1	3	0	0	3	3	2	0	1	0	2	0	1	3	0	1	2	1	1	0	1	0	0.568384	-0.602	0.636364	0.135716	-0.583	0.555556	0.92834	-0.83
Q99LJ1	Tissue alpha-L-fucosidase OS=Mus musculus GN=Fuca1 PE=2 SV=1	FUCO_MOUSE	Fuca1 Fuca	4	2	3	2	4	0	0	0	1	0	0	0	4	4	3	3	4	2	0	1	1	0	0	1	0.705993	1.187	1.33333	0.070732	0.893	3	1.01884	0.839
P06801	NADP-dependent malic enzyme OS=Mus musculus GN=Me1 PE=1 SV=2	MAOX_MOUSE	Me1 Mod-1 Mod1	6	3	3	3	2	4	2	6	3	1	1	2	3	3	2	2	2	1	2	3	4	1	1	1	1.61999	-1.467	0.619048	0.00630186	-0.312	0.8	1.35809	-1.283
P49722	Proteasome subunit alpha type-2 OS=Mus musculus GN=Psma2 PE=1 SV=3	PSA2_MOUSE	Psma2 Lmpc3	12	12	11	7	9	7	6	9	10	4	7	7	10	15	10	5	8	6	5	10	5	2	3	2	0.0174977	-0.174	0.931034	1.88488	-1.594	0.627907	0.928632	-0.672
O70481	E3 ubiquitin-protein ligase UBR1 OS=Mus musculus GN=Ubr1 PE=1 SV=2	UBR1_MOUSE	Ubr1	0	0	2	0	0	0	6	1	5	2	12	9	1	0	1	1	0	0	2	4	4	5	9	19	0.0628699	0.551	1.5	0.354145	0.34	1.22857	0.564035	0.356
O08709	Peroxiredoxin-6 OS=Mus musculus GN=Prdx6 PE=1 SV=3	PRDX6_MOUSE	Prdx6 Aop2 Ltw4 Prdx5	1	0	0	4	3	4	0	2	2	0	0	0	4	0	1	1	0	1	1	0	1	0	0	0	0.832101	-0.735	0.583333	0.00565042	-0.257	0.5	0.806034	-0.734
Q9JHE3	Neutral ceramidase OS=Mus musculus GN=Asah2 PE=1 SV=1	ASAH2_MOUSE	Asah2	2	3	2	2	2	0	0	1	0	0	0	0	1	1	0	1	2	1	0	0	0	0	0	0	0.916927	-1.482	0.545455	0.0128422	-0.503	0	0.953939	-1.103
P98064	Mannan-binding lectin serine protease 1 OS=Mus musculus GN=Masp1 PE=1 SV=2	MASP1_MOUSE	Masp1 Crarf Masp3	56	49	47	44	46	44	37	50	49	35	33	30	50	29	33	40	60	39	31	46	35	37	30	32	2.51944	-1.054	0.877622	0.0849464	-0.462	0.901709	2.12226	-0.735
P62897	Cytochrome c, somatic OS=Mus musculus GN=Cycs PE=1 SV=2	CYC_MOUSE	Cycs	5	9	3	3	9	3	4	0	1	0	0	0	4	8	4	0	5	5	0	0	0	0	0	0	0.295512	-0.505	0.8125	1.37155	-1.017	0	1.08289	-0.597
P68134	Actin, alpha skeletal muscle OS=Mus musculus GN=Acta1 PE=1 SV=1	ACTS_MOUSE	Acta1 Acta	0	0	0	0	0	16	0	0	96	0	0	0	0	0	0	0	0	0	0	0	91	0	0	0	13.5507	-0.966	0	0.156065	0.058	0.947917	0.965425	-0.138
P15116	Cadherin-2 OS=Mus musculus GN=Cdh2 PE=1 SV=2	CADH2_MOUSE	Cdh2	2	0	0	1	1	0	2	1	0	1	2	1	3	1	0	0	1	0	1	3	1	3	3	1	0.00447137	0	1.25	0.42974	1.146	1.71429	0.377683	0.821
Q80ZA4	Fibrocystin-L OS=Mus musculus GN=Pkhd1l1 PE=2 SV=1	PKHL1_MOUSE	Pkhd1l1	6	3	1	5	5	1	0	0	0	0	0	0	0	3	1	3	2	2	0	0	0	0	0	2	2.56348	-1.302	0.52381	0.0903056	0.725	#DIV/0!	1.49717	-0.798
Q9EQ21	Hepcidin OS=Mus musculus GN=Hamp PE=1 SV=1	HEPC_MOUSE	Hamp Hamp1 Hepc Hepc1	2	2	2	1	0	0	3	4	3	1	1	0	2	2	4	1	1	0	3	4	4	3	1	1	0.29875	0.664	1.42857	0.456406	0.956	1.33333	0.998158	1.212
P18242	Cathepsin D OS=Mus musculus GN=Ctsd PE=1 SV=1	CATD_MOUSE	Ctsd	9	11	13	6	9	7	6	8	8	4	4	6	13	8	11	9	7	9	8	11	12	4	5	5	0.21716	0.606	1.03636	1.11599	1.233	1.25	1.15515	0.916
P47879	Insulin-like growth factor-binding protein 4 OS=Mus musculus GN=Igfbp4 PE=2 SV=2	IBP4_MOUSE	Igfbp4 Igfbp-4	9	4	10	3	8	5	8	8	11	13	6	7	6	8	6	4	10	6	8	11	11	13	9	11	0.0127941	0	1.02564	1.10077	1.907	1.18868	0.828944	1.269
Q9DBB9	Carboxypeptidase N subunit 2 OS=Mus musculus GN=Cpn2 PE=1 SV=2	CPN2_MOUSE	Cpn2	43	50	62	56	77	57	65	77	78	62	43	44	43	46	55	43	68	52	40	82	64	60	43	47	1.35873	-1.285	0.889855	0.227304	-0.412	0.910569	1.4678	-0.938
Q91VI7	Ribonuclease inhibitor OS=Mus musculus GN=Rnh1 PE=1 SV=1	RINI_MOUSE	Rnh1 Rnh	2	2	1	1	1	2	0	0	0	0	0	0	1	0	2	1	0	0	0	0	0	0	0	0	0.963304	-1.45	0.444444	0.166667	0	#DIV/0!	0.755958	-1.038
Q8VI78	Phospholipase A1 member A OS=Mus musculus GN=Pla1a PE=2 SV=3	PLA1A_MOUSE	Pla1a Pspla1	1	0	1	0	0	0	0	0	1	0	0	0	3	0	2	1	1	0	0	0	0	0	0	0	1.51269	1.34	3.5	0.013572	-0.5	0	0.802677	1.024
P20065	Isoform Short of Thymosin beta-4 OS=Mus musculus GN=Tmsb4x	TYB4_MOUSE	Tmsb4x Ptmb4 Tmsb4	6	6	16	6	13	11	4	11	10	8	5	5	11	6	6	3	10	4	7	8	6	8	7	6	2.6423	-1.469	0.689655	0.0716409	0.611	0.976744	1.01778	-0.949
P16045	Galectin-1 OS=Mus musculus GN=Lgals1 PE=1 SV=3	LEG1_MOUSE	Lgals1 Gbp	1	1	0	1	1	1	0	0	0	0	1	0	1	0	0	1	0	0	0	0	0	0	0	0	0.371413	-1.178	0.4	4.33116e-05	-0.585	0	0.508102	-1.225
P55292	Isoform 2B of Desmocollin-2 OS=Mus musculus GN=Dsc2	DSC2_MOUSE	Dsc2 Dsc3	2	1	2	0	0	0	0	0	1	0	0	0	0	0	0	1	0	0	0	0	1	0	0	0	0.867546	-1.114	0.2	0.107586	0.058	1	0.52277	-0.994
Q9ES89	Exostosin-like 2 OS=Mus musculus GN=Extl2 PE=1 SV=1	EXTL2_MOUSE	Extl2 Extr2	3	0	0	0	1	2	0	0	0	0	0	0	0	0	1	0	1	0	0	0	0	0	0	0	1.19616	-1.051	0.333333	0.166667	0	#DIV/0!	0.862848	-0.972
O35453	Isoform 2 of Serine protease hepsin OS=Mus musculus GN=Hpn	HEPS_MOUSE	Hpn	0	0	2	1	2	1	0	0	0	0	0	0	0	0	1	0	0	1	0	0	0	0	0	0	0.628541	-1.218	0.333333	0.166667	0	#DIV/0!	0.447832	-1.024
P11404	Fatty acid-binding protein, heart OS=Mus musculus GN=Fabp3 PE=1 SV=5	FABPH_MOUSE	Fabp3 Fabph1	0	0	0	0	4	1	0	0	1	0	0	0	0	0	0	0	0	0	1	0	1	0	0	0	1.3154	-1.136	0	0.0147468	0.613	2	0.295897	-0.742
Q640N3	Isoform 2 of Rho GTPase-activating protein 30 OS=Mus musculus GN=Arhgap30	RHG30_MOUSE	Arhgap30	0	0	0	0	0	0	0	2	2	1	0	1	0	0	0	0	1	0	0	0	0	1	0	0	0.00218426	0.559	#DIV/0!	0.664261	-1.51	0.166667	0.193976	-0.943
P17751	Triosephosphate isomerase OS=Mus musculus GN=Tpi1 PE=1 SV=4	TPIS_MOUSE	Tpi1 Tpi	7	6	5	5	5	6	5	10	9	9	4	6	9	3	1	3	3	2	11	8	8	6	5	2	2.72205	-1.468	0.617647	0.0193269	0.203	0.930233	0.902565	-0.864
P55065	Phospholipid transfer protein OS=Mus musculus GN=Pltp PE=1 SV=1	PLTP_MOUSE	Pltp	35	25	32	23	42	24	14	12	15	7	8	8	19	23	25	26	39	26	5	10	9	12	6	12	1.05277	-0.965	0.872928	0.298075	-0.679	0.84375	1.45576	-0.425
Q8R242	Di-N-acetylchitobiase OS=Mus musculus GN=Ctbs PE=2 SV=2	DIAC_MOUSE	Ctbs	14	14	14	11	17	9	0	0	0	0	0	0	15	16	18	11	14	14	1	0	0	0	0	0	0.947482	1.312	1.11392	0.00913921	0.643	#DIV/0!	1.0884	0.369
P28828	Receptor-type tyrosine-protein phosphatase mu OS=Mus musculus GN=Ptprm PE=2 SV=2	PTPRM_MOUSE	Ptprm Kiaa4044	4	2	3	0	0	1	1	2	3	1	1	0	0	2	1	2	2	0	0	1	3	0	0	0	0.231918	-0.524	0.7	0.30794	-0.883	0.5	0.76415	-0.898
O09114	Isoform 2 of Prostaglandin-H2 D-isomerase OS=Mus musculus GN=Ptgds	PTGDS_MOUSE	Ptgds	3	3	1	0	2	2	3	5	2	4	1	3	2	0	2	0	3	1	0	2	0	3	3	4	0.326594	-0.731	0.727273	0.428553	-0.887	0.666667	0.996815	-1.225
P27773	Protein disulfide-isomerase A3 OS=Mus musculus GN=Pdia3 PE=1 SV=2	PDIA3_MOUSE	Pdia3 Erp Erp60 Grp58	3	1	0	1	0	2	1	2	1	1	1	2	5	2	2	3	1	2	3	1	2	0	0	0	2.18737	1.463	2.14286	0.00200056	-0.178	0.75	1.14702	1.047
Q9CZT5	Vasorin OS=Mus musculus GN=Vasn PE=2 SV=2	VASN_MOUSE	Vasn Slitl2	7	7	3	6	11	6	1	5	2	7	5	4	6	6	5	5	8	8	2	0	4	1	2	3	0.000549988	-0.171	0.95	1.91927	-1.52	0.5	0.707804	-0.682
Q9WVJ3	Isoform 2 of Carboxypeptidase Q OS=Mus musculus GN=Cpq	CBPQ_MOUSE	Cpq Hls2 Pgcp	24	19	20	13	20	19	17	20	20	10	8	7	29	21	20	16	18	15	13	26	23	11	8	8	0.254071	0	1.03478	0.594799	0.573	1.08537	0.830971	0.517
Q8VCR7	Alpha/beta hydrolase domain-containing protein 14B OS=Mus musculus GN=Abhd14b PE=2 SV=1	ABHEB_MOUSE	Abhd14b Cib	1	0	0	0	0	0	0	0	0	0	0	0	4	0	0	0	0	0	0	0	0	0	0	0	0.492181	0.606	4	0.166667	0	#DIV/0!	0.329647	0.605
Q04519	Sphingomyelin phosphodiesterase OS=Mus musculus GN=Smpd1 PE=2 SV=2	ASM_MOUSE	Smpd1 Asm	0	1	0	0	0	0	0	0	0	0	0	0	1	1	2	0	0	0	0	0	0	0	0	0	0.664524	1.127	4	0.166667	0	#DIV/0!	0.4437	1.036
P30115	Glutathione S-transferase A3 OS=Mus musculus GN=Gsta3 PE=1 SV=2	GSTA3_MOUSE	Gsta3 Gstyc	0	0	1	0	0	0	0	0	0	0	0	0	1	0	0	0	0	0	3	0	0	0	0	0	0.0815666	0	1	0.786632	0.844	#DIV/0!	0.484785	0.844
P30681	High mobility group protein B1 OS=Mus musculus GN=Hmgb1 PE=1 SV=2	HMGB2_MOUSE	Hmgb2 Hmg2	0	0	1	0	0	0	0	0	0	0	0	0	1	0	1	0	0	0	0	0	1	1	0	0	0.0181728	0.557	2	0.0599965	0.953	#DIV/0!	0.255723	1.118
P07628	Kallikrein 1-related peptidase b26 OS=Mus musculus GN=Klk1b26 PE=2 SV=1	K1KB8_MOUSE	Klk1b8 Klk-8 Klk8	0	0	0	0	0	0	1	0	0	0	0	0	0	0	0	0	2	0	0	0	0	0	1	1	0.0734802	0.717	#DIV/0!	0.00407112	0.358	2	0.147074	0.866
Q7TT37	Elongator complex protein 1 OS=Mus musculus GN=Ikbkap PE=2 SV=2	ELP1_MOUSE	Ikbkap Elp1 Ikap	0	0	0	0	0	0	1	0	0	0	0	0	1	0	1	0	1	0	0	0	1	0	0	0	0.574467	1.503	#DIV/0!	0.0736856	-0.119	1	0.250545	1.107
Q80TE0	Isoform 2 of RNA polymerase II-associated protein 1 OS=Mus musculus GN=Rpap1	RPAP1_MOUSE	Rpap1 Kiaa1403	0	0	0	0	0	0	0	1	0	0	0	0	0	0	0	0	0	1	0	1	0	1	0	1	0.00414868	0.629	#DIV/0!	0.0827876	0.912	3	0.255148	1.232
P08553	Neurofilament medium polypeptide OS=Mus musculus GN=Nefm PE=1 SV=4	NFM_MOUSE	Nefm Nef3 Nfm	0	0	0	0	0	0	0	0	1	0	0	0	0	0	0	0	2	0	0	0	1	0	0	1	0.0734802	0.717	#DIV/0!	6.04153e-05	0.513	2	0.195323	0.996
P27664	Rod cGMP-specific 3',5'-cyclic phosphodiesterase subunit alpha OS=Mus musculus GN=Pde6a PE=2 SV=3	PDE6A_MOUSE	Pde6a Mpa Pdea	0	0	0	0	0	0	0	0	1	0	0	0	0	0	0	0	0	0	0	1	0	1	1	1	0.166667	0	#DIV/0!	0.322335	1.395	4	0.203034	0.449
O70435	Proteasome subunit alpha type-3 OS=Mus musculus GN=Psma3 PE=1 SV=3	PSA3_MOUSE	Psma3	9	15	10	9	15	14	2	5	5	3	1	2	9	9	8	7	12	8	2	4	7	2	3	2	2.4063	-2.663	0.736111	0.108738	0.62	1.11111	1.35588	-0.645
P16858	Glyceraldehyde-3-phosphate dehydrogenase OS=Mus musculus GN=Gapdh PE=1 SV=2	G3P_MOUSE	Gapdh Gapd	1	2	1	5	0	1	1	2	2	1	0	1	5	2	4	2	2	2	2	1	3	0	0	0	1.09394	0.932	1.7	0.0558222	0	0.857143	0.763066	0.767
P00329	Alcohol dehydrogenase 1 OS=Mus musculus GN=Adh1 PE=1 SV=2	ADH1_MOUSE	Adh1 Adh-1	2	0	2	1	0	0	1	1	3	0	0	0	9	1	0	0	0	0	2	1	1	0	0	1	0.989828	0.503	2	0.00213755	0.315	1	0.944602	0.598
Q61129	Complement factor I OS=Mus musculus GN=Cfi PE=1 SV=3	CFAI_MOUSE	Cfi If	126	147	156	107	151	107	244	321	308	256	195	186	152	116	126	100	141	130	218	334	303	211	222	205	0.000922643	0	0.963476	1.86317	0.634	0.988742	1.03231	0.321
O70250	Phosphoglycerate mutase 2 OS=Mus musculus GN=Pgam2 PE=1 SV=3	PGAM2_MOUSE	Pgam2	0	6	0	0	2	4	1	1	2	4	4	8	7	0	2	0	0	1	2	0	4	2	3	2	0.00285785	0	0.833333	0.764695	-0.793	0.65	0.638046	-0.577
Q8CIZ8	von Willebrand factor OS=Mus musculus GN=Vwf PE=1 SV=2	VWF_MOUSE	Vwf	48	34	26	51	43	41	10	14	8	11	12	10	28	16	25	46	64	49	9	9	15	25	16	15	0.980696	-0.384	0.938272	3.72589	1.746	1.36923	0.000609243	0
P16627	Heat shock 70 kDa protein 1-like OS=Mus musculus GN=Hspa1l PE=2 SV=4	HS71L_MOUSE	Hspa1l Hsc70t	0	3	0	0	0	0	2	2	0	0	0	0	3	0	0	0	0	0	0	0	0	0	0	0	0.0413805	0	1	0.654904	-1.177	0	0.220704	-0.54
P45376	Aldose reductase OS=Mus musculus GN=Akr1b1 PE=1 SV=3	ALDR_MOUSE	Akr1b1 Akr1b3 Aldor1 Aldr1	1	1	2	4	1	1	0	1	0	0	0	0	2	0	1	1	1	0	0	1	0	0	0	0	1.17374	-1.11	0.5	0.113541	0.044	1	0.871409	-0.906
Q9DB76	ER membrane protein complex subunit 9 OS=Mus musculus GN=Emc9 PE=2 SV=1	EMC9_MOUSE	Emc9 Cgi112 Fam158a	1	2	3	1	2	2	0	0	0	0	0	0	1	0	1	0	2	2	0	0	0	0	0	0	0.913303	-1.645	0.545455	0.166667	0	#DIV/0!	0.735579	-1.014
P70195	Proteasome subunit beta type-7 OS=Mus musculus GN=Psmb7 PE=1 SV=1	PSB7_MOUSE	Psmb7 Mmc14	2	3	2	0	4	2	2	3	2	1	0	0	2	2	0	1	4	2	0	0	2	1	0	0	0.0203546	-0.364	0.846154	0.587548	-1.109	0.375	0.481611	-0.839
Q9Z2U0	Proteasome subunit alpha type-7 OS=Mus musculus GN=Psma7 PE=1 SV=1	PSA7_MOUSE	Psma7	13	17	15	13	14	11	10	17	16	14	8	13	12	16	11	6	12	9	8	15	19	7	13	10	1.6069	-1.4	0.795181	0.00341214	-0.18	0.923077	1.10459	-1.089
Q00690	E-selectin OS=Mus musculus GN=Sele PE=2 SV=1	LYAM2_MOUSE	Sele Elam-1	2	2	3	1	3	4	0	0	0	0	0	1	2	0	1	3	2	1	0	0	0	0	1	0	0.73939	-1.128	0.6	0.110781	-0.031	1	0.614833	-0.757
Q3V2T4	Isoform 2 of Keratinocyte differentiation-associated protein OS=Mus musculus GN=Krtdap	KTDAP_MOUSE	Krtdap Kdap	1	0	0	0	0	1	0	1	1	0	0	0	0	0	1	0	0	0	0	0	0	0	0	0	0.012817	-0.494	0.5	0.0221517	-0.885	0	0.179775	-0.954
Q9QXV0	ProSAAS OS=Mus musculus GN=Pcsk1n PE=1 SV=2	PCSK1_MOUSE	Pcsk1n	1	0	0	0	0	0	0	0	1	1	0	1	0	0	0	0	0	0	0	0	0	1	0	0	0.0176909	-0.663	0	0.0456068	-0.77	0.333333	0.242319	-1.14
Q04857	Collagen alpha-1(VI) chain OS=Mus musculus GN=Col6a1 PE=2 SV=1	CO6A1_MOUSE	Col6a1	0	1	0	0	0	0	1	1	1	0	0	0	0	0	0	0	0	0	1	0	0	0	0	0	0.00178472	-0.617	0	0.00362978	-0.496	0.333333	0.100555	-0.849
Q9CWJ9	Bifunctional purine biosynthesis protein PURH OS=Mus musculus GN=Atic PE=1 SV=2	PUR9_MOUSE	Atic Purh	0	1	0	1	1	0	0	0	1	0	0	0	1	0	0	0	0	0	0	0	0	0	0	0	0.140196	-0.828	0.333333	0.013572	-0.5	0	0.212569	-1.006
P13707	Glycerol-3-phosphate dehydrogenase [NAD(+)], cytoplasmic OS=Mus musculus GN=Gpd1 PE=1 SV=3	GPDA_MOUSE	Gpd1 Gdc-1 Gdc1 Kiaa4010	0	0	0	0	2	2	0	0	0	0	0	0	1	0	0	0	0	0	0	0	0	0	0	0	0.357325	-0.823	0.25	0.166667	0	#DIV/0!	0.234283	-0.789
P0C0S6	Histone H2A.J OS=Mus musculus GN=H2afj PE=1 SV=1	H2AZ_MOUSE	H2afz H2az	0	0	0	0	0	0	1	1	1	1	0	0	0	0	0	0	0	0	0	0	0	1	0	0	0.166667	0	#DIV/0!	0.195413	-1.151	0.25	0.122887	-1.013
Q91XA2	Golgi membrane protein 1 OS=Mus musculus GN=Golm1 PE=1 SV=2	GOLM1_MOUSE	Golm1 Golph2	3	3	5	2	1	1	3	4	2	0	2	2	1	2	2	1	4	2	0	1	3	1	2	1	0.234023	-0.762	0.8	0.493406	-1.075	0.615385	0.893969	-1.244
Q9D1Q6	Endoplasmic reticulum resident protein 44 OS=Mus musculus GN=Erp44 PE=1 SV=1	ERP44_MOUSE	Erp44 Kiaa0573 Txndc4	1	1	0	0	0	1	1	0	0	2	0	0	0	0	0	1	1	0	1	2	0	2	1	2	0.0101814	-0.454	0.666667	0.818625	1.464	2.66667	0.184435	0.771
Q9WV32	Actin-related protein 2/3 complex subunit 1B OS=Mus musculus GN=Arpc1b PE=2 SV=4	ARC1B_MOUSE	Arpc1b	0	1	3	1	0	1	0	0	0	0	0	0	1	3	3	0	2	1	0	0	0	0	0	0	0.596913	0.904	1.66667	0.166667	0	#DIV/0!	0.479415	0.718
P98064-2	Isoform 2 of Mannan-binding lectin serine protease 1 OS=Mus musculus GN=Masp1	MASP1_MOUSE	Masp1 Crarf Masp3	59	53	55	41	47	38	34	45	41	32	33	34	62	43	43	45	56	42	34	51	37	33	33	37	0.0225703	0	0.993174	0.650604	1.019	1.0274	0.406688	0.289
Q60994	Adiponectin OS=Mus musculus GN=Adipoq PE=1 SV=2	ADIPO_MOUSE	Adipoq Acdc Acrp30 Apm1	10	3	6	5	7	7	20	21	19	12	3	10	4	4	8	3	5	5	14	21	22	7	5	6	1.06539	-0.996	0.763158	0.0574548	-0.175	0.882353	0.780311	-0.539
Q9Z0Z4	Isoform 2 of Hephaestin OS=Mus musculus GN=Heph	HEPH_MOUSE	Heph Kiaa0698	11	9	7	3	5	4	1	2	1	0	0	0	4	5	7	7	4	3	0	2	1	0	0	0	0.647147	-0.656	0.769231	0.00409258	-0.269	0.75	0.697267	-0.443
Q91WG0	Acylcarnitine hydrolase OS=Mus musculus GN=Ces2c PE=1 SV=1	EST2C_MOUSE	Ces2c Ces2	6	9	0	8	17	11	0	0	0	0	0	0	0	5	9	11	8	7	0	0	0	0	0	0	0.596292	-0.479	0.784314	0.166667	0	#DIV/0!	0.566232	-0.311
P14211	Calreticulin OS=Mus musculus GN=Calr PE=1 SV=1	CALR_MOUSE	Calr	1	1	1	2	3	5	1	2	0	0	1	0	5	1	0	0	1	1	1	0	2	0	0	0	0.756551	-0.728	0.615385	0.0145027	-0.186	0.75	0.67659	-0.705
Q9JK39	Isoform 2 of Butyrophilin-like protein 10 OS=Mus musculus GN=Btnl10	BTNLA_MOUSE	Btnl10 Butr1	1	0	0	0	0	0	0	1	0	0	0	0	1	0	0	0	0	0	0	0	0	1	0	3	0.0826344	0	1	0.361556	0.835	4	0.166681	0.697
P0C6F1	Dynein heavy chain 2, axonemal OS=Mus musculus GN=Dnah2 PE=2 SV=1	DYH2_MOUSE	Dnah2 Dnahc2	0	1	0	0	0	0	0	0	1	0	0	0	1	2	0	0	0	0	0	1	1	0	0	0	0.246805	0.751	3	0.00156635	0.461	2	0.332599	0.952
P41209	Centrin-1 OS=Mus musculus GN=Cetn1 PE=1 SV=1	CETN1_MOUSE	Cetn1 Calt	0	1	0	1	0	0	0	0	0	0	0	0	0	0	0	1	3	1	0	0	0	0	0	0	0.218964	0.722	2.5	0.166667	0	#DIV/0!	0.152667	0.661
Q9Z185	Protein-arginine deiminase type-1 OS=Mus musculus GN=Padi1 PE=1 SV=1	PADI1_MOUSE	Padi1 Pad1 Pdi1	0	1	0	0	0	0	0	0	0	1	0	0	1	0	0	0	1	1	0	0	0	1	1	0	0.125237	0.841	3	0.000142211	0.455	2	0.232859	1.046
P24549	Retinal dehydrogenase 1 OS=Mus musculus GN=Aldh1a1 PE=1 SV=5	AL1A1_MOUSE	Aldh1a1 Ahd-2 Ahd2 Aldh1	0	0	2	0	0	0	0	0	0	0	0	0	0	0	2	1	1	1	0	0	0	0	0	0	0.61943	1.047	2.5	0.166667	0	#DIV/0!	0.433901	0.94
P60710	Actin, cytoplasmic 2 OS=Mus musculus GN=Actg1 PE=1 SV=1	ACTB_MOUSE	Actb	65	53	75	25	29	23	84	88	118	68	50	61	62	58	69	33	37	31	72	84	111	69	55	54	1.98112	0	1.07407	0.0561337	0.133	0.948827	1.31788	0.439
P05064	Fructose-bisphosphate aldolase A OS=Mus musculus GN=Aldoa PE=1 SV=2	ALDOA_MOUSE	Aldoa Aldo1	22	32	31	16	28	29	22	44	29	28	24	39	28	37	25	22	29	21	24	31	31	21	22	16	0.427809	0.56	1.02532	2.29305	-1.222	0.77957	0.227302	-0.363
P01901	H-2 class I histocompatibility antigen, K-B alpha chain OS=Mus musculus GN=H2-K1 PE=1 SV=1	HA1B_MOUSE	H2-K1 H2-K	0	8	4	6	4	4	0	0	4	0	0	0	7	7	4	0	8	4	0	0	0	0	0	6	0.127706	0	1.15385	0.209164	0.396	1.5	0.388161	0.376
P98063	Bone morphogenetic protein 1 OS=Mus musculus GN=Bmp1 PE=1 SV=2	BMP1_MOUSE	Bmp1	7	4	5	2	4	4	4	4	2	3	2	4	3	0	2	5	3	5	3	3	1	6	2	2	0.950405	-0.906	0.692308	6.32711e-05	-0.174	0.894737	0.726138	-0.846
P08226	Apolipoprotein E OS=Mus musculus GN=Apoe PE=1 SV=2	APOE_MOUSE	Apoe	153	209	156	111	192	121	410	585	555	556	461	405	179	420	114	114	183	137	308	943	355	421	325	303	37.1545	0.797	1.21762	7.19373	-0.433	0.893338	1.74141	0
Q3UH93	Plexin-D1 OS=Mus musculus GN=Plxnd1 PE=1 SV=1	PLXD1_MOUSE	Plxnd1	1	0	1	0	0	0	2	1	1	1	0	1	1	0	0	1	0	0	0	1	0	0	1	0	0.0451496	0	1	0.521464	-1.345	0.333333	0.222192	-0.887
Q9DAR7	m7GpppX diphosphatase OS=Mus musculus GN=Dcps PE=1 SV=1	DCPS_MOUSE	Dcps Dcs1 Hint5	2	2	2	1	0	1	0	0	0	0	0	0	1	1	0	1	0	1	0	0	0	0	0	0	0.59699	-1.273	0.5	0.166667	0	#DIV/0!	0.463158	-0.909
P70269	Cathepsin E OS=Mus musculus GN=Ctse PE=1 SV=2	CATE_MOUSE	Ctse	3	4	3	3	2	2	1	0	2	1	2	1	1	3	3	3	3	1	1	0	0	0	1	1	0.107158	-0.625	0.823529	0.295671	-1.106	0.428571	0.47704	-0.766
Q06318	Uteroglobin OS=Mus musculus GN=Scgb1a1 PE=1 SV=1	UTER_MOUSE	Scgb1a1 Cc10 Ugb Utg	1	2	2	0	3	2	1	2	1	0	1	2	2	0	1	1	3	2	2	4	2	1	3	1	0.00466342	-0.157	0.9	0.930049	1.592	1.85714	0.326865	0.971
O88998	Isoform 3 of Noelin OS=Mus musculus GN=Olfm1	NOE1_MOUSE	Olfm1 Noe1 Noel Noel1	10	7	10	6	6	6	4	7	5	3	5	4	2	7	6	6	4	5	3	6	6	5	6	4	2.31707	-1.533	0.666667	0.0647959	0.828	1.07143	0.939123	-0.927
Q8BPB5	EGF-containing fibulin-like extracellular matrix protein 1 OS=Mus musculus GN=Efemp1 PE=2 SV=1	FBLN3_MOUSE	Efemp1 Fbln3	49	50	41	46	58	42	50	57	58	41	34	36	53	23	42	45	69	48	30	44	41	45	38	33	0.0199888	0	0.979021	1.4037	-1.358	0.836957	0.796592	-0.489
O88456	Calpain small subunit 1 OS=Mus musculus GN=Capns1 PE=2 SV=1	CPNS1_MOUSE	Capns1 Capn4	0	0	0	0	0	0	0	0	0	0	0	0	1	0	0	0	0	1	0	0	0	0	0	0	0.225609	1.083	#DIV/0!	0.166667	0	#DIV/0!	0.131439	1.033
O89051	Integral membrane protein 2B OS=Mus musculus GN=Itm2b PE=2 SV=1	ITM2B_MOUSE	Itm2b	0	0	0	0	0	0	0	0	0	0	0	0	1	0	0	0	0	0	1	0	0	0	0	0	0.00566811	0.635	#DIV/0!	0.00913921	0.643	#DIV/0!	0.147334	1.043
P04202	Transforming growth factor beta-1 OS=Mus musculus GN=Tgfb1 PE=1 SV=1	TGFB1_MOUSE	Tgfb1	0	0	0	0	0	0	0	0	0	0	0	0	1	0	0	0	0	0	0	1	0	0	0	0	0.00566811	0.635	#DIV/0!	0.0068583	0.529	#DIV/0!	0.0695582	1.293
P35822	Receptor-type tyrosine-protein phosphatase kappa OS=Mus musculus GN=Ptprk PE=1 SV=1	PTPRK_MOUSE	Ptprk Ptpk	0	0	0	0	0	0	0	0	0	0	0	0	1	0	0	1	0	0	0	0	0	0	0	0	0.323528	1.116	#DIV/0!	0.166667	0	#DIV/0!	0.191254	1.064
P48298	Eotaxin OS=Mus musculus GN=Ccl11 PE=2 SV=1	CCL11_MOUSE	Ccl11 Scya11	0	0	0	0	0	0	0	0	0	0	0	0	1	0	0	0	0	0	0	0	0	1	0	0	0.00566811	0.635	#DIV/0!	0.00214747	0.557	#DIV/0!	0.0829158	0.632
P52760	Ribonuclease UK114 OS=Mus musculus GN=Hrsp12 PE=1 SV=3	UK114_MOUSE	Hrsp12 Hrp12	0	0	0	0	0	0	0	0	0	0	0	0	2	0	0	0	0	0	0	0	0	0	0	0	0.234584	0.777	#DIV/0!	0.166667	0	#DIV/0!	0.136869	0.775
P97351	40S ribosomal protein S3a OS=Mus musculus GN=Rps3a PE=1 SV=3	RS3A_MOUSE	Rps3a Rps3a1	0	0	0	0	0	0	0	0	0	0	0	0	1	0	0	0	0	0	0	1	0	0	0	0	0.00566811	0.635	#DIV/0!	0.0068583	0.529	#DIV/0!	0.0695582	1.293
P97430	Antileukoproteinase OS=Mus musculus GN=Slpi PE=2 SV=1	SLPI_MOUSE	Slpi	0	0	0	0	0	0	0	0	0	0	0	0	1	0	0	0	0	0	0	0	1	0	0	0	0.00566811	0.635	#DIV/0!	0.00586536	0.534	#DIV/0!	0.0717498	0.632
P97447	Four and a half LIM domains protein 1 OS=Mus musculus GN=Fhl1 PE=1 SV=3	FHL1_MOUSE	Fhl1	0	0	0	0	0	0	0	0	0	0	0	0	2	0	0	0	0	0	0	0	0	0	0	0	0.234584	0.777	#DIV/0!	0.166667	0	#DIV/0!	0.136869	0.775
Q04892	Transcription factor SOX-14 OS=Mus musculus GN=Sox14 PE=2 SV=2	SOX14_MOUSE	Sox14 Sox-14	0	0	0	0	0	0	0	0	0	0	0	0	1	0	0	0	0	0	0	0	0	0	0	1	0.00566811	0.635	#DIV/0!	0.000907433	0.569	#DIV/0!	0.0892652	0.632
Q07797	Galectin-3-binding protein OS=Mus musculus GN=Lgals3bp PE=1 SV=1	LG3BP_MOUSE	Lgals3bp Cycap Mama	0	0	0	0	0	0	0	0	0	0	0	0	1	1	0	0	0	0	0	0	0	0	0	0	0.257041	1.096	#DIV/0!	0.166667	0	#DIV/0!	0.150503	1.045
Q3V0Q1	Dynein heavy chain 12, axonemal OS=Mus musculus GN=Dnah12 PE=1 SV=2	DYH12_MOUSE	Dnah12 Dnah12l Dnah7l Dnahc12 Dnahc7l	0	0	0	0	0	0	0	0	0	0	0	0	2	0	0	0	0	0	0	0	0	0	0	0	0.234584	0.777	#DIV/0!	0.166667	0	#DIV/0!	0.136869	0.775
Q61884	Meiosis-specific nuclear structural protein 1 OS=Mus musculus GN=Mns1 PE=1 SV=1	MNS1_MOUSE	Mns1	0	0	0	0	0	0	0	0	0	0	0	0	1	0	0	1	0	0	0	0	0	0	0	0	0.323528	1.116	#DIV/0!	0.166667	0	#DIV/0!	0.191254	1.064
Q62511	Isoform 2 of E3 ubiquitin-protein ligase ZFP91 OS=Mus musculus GN=Zfp91	ZFP91_MOUSE	Zfp91 Pzf	0	0	0	0	0	0	0	0	0	0	0	0	1	0	0	0	0	0	0	0	0	0	0	1	0.00566811	0.635	#DIV/0!	0.000907433	0.569	#DIV/0!	0.0892652	0.632
Q640N1	Isoform 2 of Adipocyte enhancer-binding protein 1 OS=Mus musculus GN=Aebp1	AEBP1_MOUSE	Aebp1 Aclp	0	0	0	0	0	0	0	0	0	0	0	0	1	0	0	0	0	1	0	0	0	0	0	0	0.225609	1.083	#DIV/0!	0.166667	0	#DIV/0!	0.131439	1.033
Q64331	Unconventional myosin-VI OS=Mus musculus GN=Myo6 PE=1 SV=1	MYO6_MOUSE	Myo6 Sv	0	0	0	0	0	0	0	0	0	0	0	0	1	0	1	0	0	0	0	0	0	0	0	0	0.244308	1.091	#DIV/0!	0.166667	0	#DIV/0!	0.142764	1.041
Q6NVF9	Cleavage and polyadenylation specificity factor subunit 6 OS=Mus musculus GN=Cpsf6 PE=2 SV=1	CPSF6_MOUSE	Cpsf6	0	0	0	0	0	0	0	0	0	0	0	0	1	0	0	0	0	0	0	0	1	0	0	0	0.00566811	0.635	#DIV/0!	0.00586536	0.534	#DIV/0!	0.0717498	0.632
Q80TF6	StAR-related lipid transfer protein 9 OS=Mus musculus GN=Stard9 PE=2 SV=2	STAR9_MOUSE	Stard9 Kiaa1300 Kif16a	0	0	0	0	0	0	0	0	0	0	0	0	1	0	0	0	1	0	0	0	0	0	0	0	0.144227	1.024	#DIV/0!	0.166667	0	#DIV/0!	0.0827642	0.981
Q8R090	Chromaffin granule amine transporter OS=Mus musculus GN=Slc18a1 PE=2 SV=1	VMAT1_MOUSE	Slc18a1 Vmat1	0	0	0	0	0	0	0	0	0	0	0	0	2	0	0	0	0	0	0	0	0	0	0	0	0.234584	0.777	#DIV/0!	0.166667	0	#DIV/0!	0.136869	0.775
Q8VIM0	Hepatitis A virus cellular receptor 2 homolog OS=Mus musculus GN=Havcr2 PE=1 SV=1	HAVR2_MOUSE	Havcr2 Tim3 Timd3	0	0	0	0	0	0	0	0	0	0	0	0	2	0	0	0	0	0	0	0	0	0	0	0	0.234584	0.777	#DIV/0!	0.166667	0	#DIV/0!	0.136869	0.775
Q920E5	Farnesyl pyrophosphate synthase OS=Mus musculus GN=Fdps PE=1 SV=1	FPPS_MOUSE	Fdps	0	0	0	0	0	0	0	0	0	0	0	0	1	1	0	0	0	0	0	0	0	0	0	0	0.257041	1.096	#DIV/0!	0.166667	0	#DIV/0!	0.150503	1.045
Q921X9	Protein disulfide-isomerase A5 OS=Mus musculus GN=Pdia5 PE=2 SV=1	PDIA5_MOUSE	Pdia5 Pdir	0	0	0	0	0	0	0	0	0	0	0	0	1	0	0	0	0	0	0	0	0	0	0	1	0.00566811	0.635	#DIV/0!	0.000907433	0.569	#DIV/0!	0.0892652	0.632
Q922J3	Isoform 2 of CAP-Gly domain-containing linker protein 1 OS=Mus musculus GN=Clip1	CLIP1_MOUSE	Clip1 Kiaa4046 Rsn	0	0	0	0	0	0	0	0	0	0	0	0	1	0	0	0	0	0	0	0	0	1	0	0	0.00566811	0.635	#DIV/0!	0.00214747	0.557	#DIV/0!	0.0829158	0.632
Q99K85	Phosphoserine aminotransferase OS=Mus musculus GN=Psat1 PE=1 SV=1	SERC_MOUSE	Psat1 Psa Psat	0	0	0	0	0	0	0	0	0	0	0	0	1	0	0	0	0	1	0	0	0	0	0	0	0.225609	1.083	#DIV/0!	0.166667	0	#DIV/0!	0.131439	1.033
Q99LH2	Phosphatidylserine synthase 1 OS=Mus musculus GN=Ptdss1 PE=2 SV=1	PTSS1_MOUSE	Ptdss1 Pssa	0	0	0	0	0	0	0	0	0	0	0	0	1	0	1	0	0	0	0	0	0	0	0	0	0.244308	1.091	#DIV/0!	0.166667	0	#DIV/0!	0.142764	1.041
Q9D6Y9	1,4-alpha-glucan-branching enzyme OS=Mus musculus GN=Gbe1 PE=2 SV=1	GLGB_MOUSE	Gbe1	0	0	0	0	0	0	0	0	0	0	0	0	1	0	0	0	0	0	0	1	0	0	0	0	0.00566811	0.635	#DIV/0!	0.0068583	0.529	#DIV/0!	0.0695582	1.293
Q9DBE0	Cysteine sulfinic acid decarboxylase OS=Mus musculus GN=Csad PE=2 SV=1	CSAD_MOUSE	Csad	0	0	0	0	0	0	0	0	0	0	0	0	2	0	0	0	0	0	0	0	0	0	0	0	0.234584	0.777	#DIV/0!	0.166667	0	#DIV/0!	0.136869	0.775
Q9DCG6	Phenazine biosynthesis-like domain-containing protein 1 OS=Mus musculus GN=Pbld1 PE=2 SV=2	PBLD1_MOUSE	Pbld1 Mawbp2 Pbld	0	0	0	0	0	0	0	0	0	0	0	0	2	0	0	0	0	0	0	0	0	0	0	0	0.234584	0.777	#DIV/0!	0.166667	0	#DIV/0!	0.136869	0.775
Q9JII6	Alcohol dehydrogenase [NADP(+)] OS=Mus musculus GN=Akr1a1 PE=1 SV=3	AK1A1_MOUSE	Akr1a1 Akr1a4	0	0	0	0	0	0	0	0	0	0	0	0	1	0	0	0	0	0	1	0	0	0	0	0	0.00566811	0.635	#DIV/0!	0.00913921	0.643	#DIV/0!	0.147334	1.043
Q9JJ80	Ribosome production factor 2 homolog OS=Mus musculus GN=Rpf2 PE=2 SV=2	RPF2_MOUSE	Rpf2 Bxdc1 MNCb-4285	0	0	0	0	0	0	0	0	0	0	0	0	1	0	0	0	0	0	0	0	0	1	0	0	0.00566811	0.635	#DIV/0!	0.00214747	0.557	#DIV/0!	0.0829158	0.632
A2AEY4	Isoform 2 of MAP7 domain-containing protein 3 OS=Mus musculus GN=Map7d3	MA7D3_MOUSE	Map7d3 Mdp3 Mtap7d3	0	0	0	0	0	0	0	0	0	0	0	0	0	1	0	0	0	1	0	0	0	0	0	0	0.247718	1.092	#DIV/0!	0.166667	0	#DIV/0!	0.144834	1.041
P01787	Ig heavy chain V region HPCG14 OS=Mus musculus PE=1 SV=1	HVM18_MOUSE	0	0	0	0	0	0	0	0	0	0	0	0	0	0	2	0	0	0	0	0	0	0	0	0	0	0.280332	0.787	#DIV/0!	0.166667	0	#DIV/0!	0.164715	0.785
P08032	Spectrin alpha chain, erythrocytic 1 OS=Mus musculus GN=Spta1 PE=2 SV=3	SPTA1_MOUSE	Spta1 Spna1 Spta	0	0	0	0	0	0	0	0	0	0	0	0	0	1	0	0	0	1	0	0	0	0	0	0	0.247718	1.092	#DIV/0!	0.166667	0	#DIV/0!	0.144834	1.041
P11247	Myeloperoxidase OS=Mus musculus GN=Mpo PE=2 SV=2	PERM_MOUSE	Mpo	0	0	0	0	0	0	0	0	0	0	0	0	0	1	1	0	0	0	0	0	0	0	0	0	0.267132	1.101	#DIV/0!	0.166667	0	#DIV/0!	0.156652	1.049
P48722	Isoform 2 of Heat shock 70 kDa protein 4L OS=Mus musculus GN=Hspa4l	HS74L_MOUSE	Hspa4l Apg1 Hsp4l Osp94	0	0	0	0	0	0	0	0	0	0	0	0	0	2	0	0	0	0	0	0	0	0	0	0	0.280332	0.787	#DIV/0!	0.166667	0	#DIV/0!	0.164715	0.785
Q61220	Protein kinase C-binding protein NELL2 OS=Mus musculus GN=Nell2 PE=2 SV=3	NELL2_MOUSE	Nell2 Mel91	0	0	0	0	0	0	0	0	0	0	0	0	0	2	0	0	0	0	0	0	0	0	0	0	0.280332	0.787	#DIV/0!	0.166667	0	#DIV/0!	0.164715	0.785
Q8BVV7	Centrosomal protein of 95 kDa OS=Mus musculus GN=Cep95 PE=2 SV=2	CEP95_MOUSE	Cep95 Ccdc45	0	0	0	0	0	0	0	0	0	0	0	0	0	1	0	0	0	1	0	0	0	0	0	0	0.247718	1.092	#DIV/0!	0.166667	0	#DIV/0!	0.144834	1.041
Q8R1L8	Betatrophin OS=Mus musculus GN=Gm6484 PE=1 SV=2	BETAT_MOUSE	Gm6484 Angptl8 Rifl	0	0	0	0	0	0	0	0	0	0	0	0	0	1	0	1	0	0	0	0	0	0	0	0	0.349019	1.128	#DIV/0!	0.166667	0	#DIV/0!	0.207019	1.075
Q8VD04	GRIP1-associated protein 1 OS=Mus musculus GN=Gripap1 PE=1 SV=1	GRAP1_MOUSE	Gripap1 DXImx47e Kiaa1167	0	0	0	0	0	0	0	0	0	0	0	0	0	1	1	0	0	0	0	0	0	0	0	0	0.267132	1.101	#DIV/0!	0.166667	0	#DIV/0!	0.156652	1.049
Q9CQJ8	NADH dehydrogenase [ubiquinone] 1 beta subcomplex subunit 9 OS=Mus musculus GN=Ndufb9 PE=1 SV=3	NDUB9_MOUSE	Ndufb9	0	0	0	0	0	0	0	0	0	0	0	0	0	1	0	1	0	0	0	0	0	0	0	0	0.349019	1.128	#DIV/0!	0.166667	0	#DIV/0!	0.207019	1.075
Q9DBX3	Isoform 3 of Sushi domain-containing protein 2 OS=Mus musculus GN=Susd2	SUSD2_MOUSE	Susd2	0	0	0	0	0	0	0	0	0	0	0	0	0	1	0	0	0	0	0	0	0	0	0	1	0.0103208	0.648	#DIV/0!	0.000907433	0.569	#DIV/0!	0.10056	0.646
Q9R0G8	Nik-related protein kinase OS=Mus musculus GN=Nrk PE=1 SV=2	NRK_MOUSE	Nrk Nesk	0	0	0	0	0	0	0	0	0	0	0	0	0	1	0	0	0	0	0	0	0	0	0	1	0.0103208	0.648	#DIV/0!	0.000907433	0.569	#DIV/0!	0.10056	0.646
O35492	Dual specificity protein kinase CLK3 OS=Mus musculus GN=Clk3 PE=1 SV=2	CLK3_MOUSE	Clk3	0	0	0	0	0	0	0	0	0	0	0	0	0	0	1	0	0	0	0	0	1	0	0	0	0.00753942	0.641	#DIV/0!	0.00586536	0.534	#DIV/0!	0.0761571	0.638
O89001	Carboxypeptidase D OS=Mus musculus GN=Cpd PE=1 SV=2	CBPD_MOUSE	Cpd	0	0	0	0	0	0	0	0	0	0	0	0	0	0	1	0	0	1	0	0	0	0	0	0	0.235179	1.087	#DIV/0!	0.166667	0	#DIV/0!	0.137229	1.037
Q7TQI8	Testis-specific Y-encoded-like protein 2 OS=Mus musculus GN=Tspyl2 PE=1 SV=1	TSYL2_MOUSE	Tspyl2 Cinap Dentt DXBwg1396e Tspx	0	0	0	0	0	0	0	0	0	0	0	0	0	0	2	0	0	0	0	0	0	0	0	0	0.254193	0.781	#DIV/0!	0.166667	0	#DIV/0!	0.14877	0.779
Q80WV7	Isoform 2 of Serine/arginine repetitive matrix protein 3 OS=Mus musculus GN=Srrm3	SRRM3_MOUSE	Srrm3 MNCb-4760	0	0	0	0	0	0	0	0	0	0	0	0	0	0	1	0	1	0	0	0	0	0	0	0	0.15217	1.027	#DIV/0!	0.166667	0	#DIV/0!	0.0874671	0.984
Q80YR5	Scaffold attachment factor B2 OS=Mus musculus GN=Safb2 PE=2 SV=2	SAFB2_MOUSE	Safb2	0	0	0	0	0	0	0	0	0	0	0	0	0	0	1	0	0	0	0	0	1	0	0	0	0.00753942	0.641	#DIV/0!	0.00586536	0.534	#DIV/0!	0.0761571	0.638
Q8BXQ6	Isoform 2 of Aminopeptidase O OS=Mus musculus GN=Aopep	AMPO_MOUSE	Aopep Onpep	0	0	0	0	0	0	0	0	0	0	0	0	0	0	1	1	0	0	0	0	0	0	0	0	0.334588	1.121	#DIV/0!	0.166667	0	#DIV/0!	0.198085	1.069
Q8C6B2	Isoform 2 of Rhotekin OS=Mus musculus GN=Rtkn	RTKN_MOUSE	Rtkn	0	0	0	0	0	0	0	0	0	0	0	0	0	0	1	1	0	0	0	0	0	0	0	0	0.334588	1.121	#DIV/0!	0.166667	0	#DIV/0!	0.198085	1.069
Q8K019	Isoform 3 of Bcl-2-associated transcription factor 1 OS=Mus musculus GN=Bclaf1	BCLF1_MOUSE	Bclaf1 Btf Kiaa0164	0	0	0	0	0	0	0	0	0	0	0	0	0	0	1	0	0	0	0	0	0	0	0	1	0.00753942	0.641	#DIV/0!	0.000907433	0.569	#DIV/0!	0.094132	0.638
Q8VDD9	PH-interacting protein OS=Mus musculus GN=Phip PE=1 SV=2	PHIP_MOUSE	Phip Ndrp Phip1 Wdr11	0	0	0	0	0	0	0	0	0	0	0	0	0	0	1	0	0	0	0	0	0	0	0	1	0.00753942	0.641	#DIV/0!	0.000907433	0.569	#DIV/0!	0.094132	0.638
Q8VIJ6	Splicing factor, proline- and glutamine-rich OS=Mus musculus GN=Sfpq PE=1 SV=1	SFPQ_MOUSE	Sfpq Psf	0	0	0	0	0	0	0	0	0	0	0	0	0	0	1	0	0	0	1	0	0	0	0	0	0.00753942	0.641	#DIV/0!	0.00913921	0.643	#DIV/0!	0.153425	1.048
Q99M96	Isoform 9 of Suppressor of tumorigenicity 7 protein OS=Mus musculus GN=St7	ST7_MOUSE	St7	0	0	0	0	0	0	0	0	0	0	0	0	0	0	1	0	0	0	0	0	1	0	0	0	0.00753942	0.641	#DIV/0!	0.00586536	0.534	#DIV/0!	0.0761571	0.638
Q9JMK0	Beta-1,4-galactosyltransferase 5 OS=Mus musculus GN=B4galt5 PE=2 SV=2	B4GT5_MOUSE	B4galt5 Bgt-5	0	0	0	0	0	0	0	0	0	0	0	0	0	0	1	0	1	0	0	0	0	0	0	0	0.15217	1.027	#DIV/0!	0.166667	0	#DIV/0!	0.0874671	0.984
F8VQB6	Isoform Headless of Unconventional myosin-X OS=Mus musculus GN=Myo10	MYO10_MOUSE	Myo10	0	0	0	0	0	0	0	0	0	0	0	0	0	0	0	1	1	0	0	0	0	0	0	0	0.218476	1.046	#DIV/0!	0.166667	0	#DIV/0!	0.127131	1.003
P17879	Heat shock 70 kDa protein 1A OS=Mus musculus GN=Hspa1a PE=1 SV=2	HS71B_MOUSE	Hspa1b Hcp70.1 Hsp70-1 Hsp70a1 Hspa1	0	0	0	0	0	0	0	0	0	0	0	0	0	0	0	2	0	0	0	0	0	0	0	0	0.423524	0.81	#DIV/0!	0.166667	0	#DIV/0!	0.253509	0.808
P36371	Antigen peptide transporter 2 OS=Mus musculus GN=Tap2 PE=2 SV=1	TAP2_MOUSE	Tap2 Abcb3 Ham-2 Ham2	0	0	0	0	0	0	0	0	0	0	0	0	0	0	0	1	0	0	1	0	0	0	0	0	0.0299725	0.681	#DIV/0!	0.00913921	0.643	#DIV/0!	0.203366	1.072
P51612	DNA repair protein complementing XP-C cells homolog OS=Mus musculus GN=Xpc PE=1 SV=2	XPC_MOUSE	Xpc	0	0	0	0	0	0	0	0	0	0	0	0	0	0	0	1	0	0	0	0	0	1	0	0	0.0299725	0.681	#DIV/0!	0.00214747	0.557	#DIV/0!	0.127316	0.678
P54818	Galactocerebrosidase OS=Mus musculus GN=Galc PE=1 SV=2	GALC_MOUSE	Galc	0	0	0	0	0	0	0	0	0	0	0	0	0	0	0	1	0	1	0	0	0	0	0	0	0.313284	1.111	#DIV/0!	0.166667	0	#DIV/0!	0.18494	1.06
P58774	Isoform 2 of Tropomyosin beta chain OS=Mus musculus GN=Tpm2	TPM2_MOUSE	Tpm2 Tpm-2	0	0	0	0	0	0	0	0	0	0	0	0	0	0	0	2	0	0	0	0	0	0	0	0	0.423524	0.81	#DIV/0!	0.166667	0	#DIV/0!	0.253509	0.808
Q3UFM5	Nucleolar MIF4G domain-containing protein 1 OS=Mus musculus GN=Nom1 PE=2 SV=2	NOM1_MOUSE	Nom1 Gm1040	0	0	0	0	0	0	0	0	0	0	0	0	0	0	0	1	0	1	0	0	0	0	0	0	0.313284	1.111	#DIV/0!	0.166667	0	#DIV/0!	0.18494	1.06
Q61221	Isoform 2 of Hypoxia-inducible factor 1-alpha OS=Mus musculus GN=Hif1a	HIF1A_MOUSE	Hif1a	0	0	0	0	0	0	0	0	0	0	0	0	0	0	0	1	0	0	0	0	0	1	0	0	0.0299725	0.681	#DIV/0!	0.00214747	0.557	#DIV/0!	0.127316	0.678
Q64459	Cytochrome P450 3A41 OS=Mus musculus GN=Cyp3a41a PE=2 SV=2	CP3AB_MOUSE	Cyp3a11 Cyp3a-11	0	0	0	0	0	0	0	0	0	0	0	0	0	0	0	1	0	1	0	0	0	0	0	0	0.313284	1.111	#DIV/0!	0.166667	0	#DIV/0!	0.18494	1.06
Q6ZPV2	Isoform 2 of DNA helicase INO80 OS=Mus musculus GN=Ino80	INO80_MOUSE	Ino80 Inoc1 Kiaa1259	0	0	0	0	0	0	0	0	0	0	0	0	0	0	0	1	0	0	0	0	0	1	0	0	0.0299725	0.681	#DIV/0!	0.00214747	0.557	#DIV/0!	0.127316	0.678
Q8BW72	Isoform 2 of Lysine-specific demethylase 4A OS=Mus musculus GN=Kdm4a	KDM4A_MOUSE	Kdm4a Jhdm3a Jmjd2 Jmjd2a Kiaa0677	0	0	0	0	0	0	0	0	0	0	0	0	0	0	0	1	0	0	0	1	0	0	0	0	0.0299725	0.681	#DIV/0!	0.0068583	0.529	#DIV/0!	0.110923	0.98
Q923B3	Neurotrophin receptor-interacting factor 1 OS=Mus musculus GN=Nrif1 PE=1 SV=3	NRIF1_MOUSE	Nrif1 Nrif Zfp110	0	0	0	0	0	0	0	0	0	0	0	0	0	0	0	1	0	0	0	0	0	0	0	1	0.0299725	0.681	#DIV/0!	0.000907433	0.569	#DIV/0!	0.135009	0.678
A2AJK6	Isoform 3 of Chromodomain-helicase-DNA-binding protein 7 OS=Mus musculus GN=Chd7	CHD7_MOUSE	Chd7	0	0	0	0	0	0	0	0	0	0	0	0	0	0	0	0	1	0	0	1	0	0	0	0	0.00218426	0.559	#DIV/0!	0.0068583	0.529	#DIV/0!	0.0320521	0.913
P55066	Neurocan core protein OS=Mus musculus GN=Ncan PE=2 SV=1	NCAN_MOUSE	Ncan Cspg3	0	0	0	0	0	0	0	0	0	0	0	0	0	0	0	0	1	0	0	0	0	0	1	0	0.00218426	0.559	#DIV/0!	0.000723373	0.571	#DIV/0!	0.0471269	0.557
Q02384	Son of sevenless homolog 2 OS=Mus musculus GN=Sos2 PE=1 SV=2	SOS2_MOUSE	Sos2	0	0	0	0	0	0	0	0	0	0	0	0	0	0	0	0	1	0	0	0	0	0	1	0	0.00218426	0.559	#DIV/0!	0.000723373	0.571	#DIV/0!	0.0471269	0.557
Q05D44	Eukaryotic translation initiation factor 5B OS=Mus musculus GN=Eif5b PE=1 SV=2	IF2P_MOUSE	Eif5b If2	0	0	0	0	0	0	0	0	0	0	0	0	0	0	0	0	1	1	0	0	0	0	0	0	0.136941	1.021	#DIV/0!	0.166667	0	#DIV/0!	0.0784605	1.639
Q8BSQ9	Isoform 2 of Protein polybromo-1 OS=Mus musculus GN=Pbrm1	PB1_MOUSE	Pbrm1 Baf180 Pb1	0	0	0	0	0	0	0	0	0	0	0	0	0	0	0	0	1	0	0	0	0	0	0	1	0.00218426	0.559	#DIV/0!	0.000907433	0.569	#DIV/0!	0.046173	0.557
Q8C3S2	Isoform 3 of Transport and Golgi organization protein 6 homolog OS=Mus musculus GN=Tango6	TNG6_MOUSE	Tango6 Kiaa1746 Tmco7	0	0	0	0	0	0	0	0	0	0	0	0	0	0	0	0	2	0	0	0	0	0	0	0	0.0734802	0.717	#DIV/0!	0.166667	0	#DIV/0!	0.0414275	1.027
Q8K2I9	F-box only protein 18 OS=Mus musculus GN=Fbxo18 PE=2 SV=1	FBH1_MOUSE	Fbxo18 Fbh1 Fbx18	0	0	0	0	0	0	0	0	0	0	0	0	0	0	0	0	1	0	0	0	0	0	0	1	0.00218426	0.559	#DIV/0!	0.000907433	0.569	#DIV/0!	0.046173	0.557
Q8K4K2	Tribbles homolog 3 OS=Mus musculus GN=Trib3 PE=1 SV=2	TRIB3_MOUSE	Trib3 Nipk Trb3	0	0	0	0	0	0	0	0	0	0	0	0	0	0	0	0	1	0	0	0	1	0	0	0	0.00218426	0.559	#DIV/0!	0.00586536	0.534	#DIV/0!	0.0335805	0.557
A2AGL3	Isoform 2 of Ryanodine receptor 3 OS=Mus musculus GN=Ryr3	RYR3_MOUSE	Ryr3	0	0	0	0	0	0	0	0	0	0	0	0	0	0	0	0	0	1	0	0	0	0	0	1	0.00414868	0.629	#DIV/0!	0.000907433	0.569	#DIV/0!	0.0848067	0.986
Q64733	Forkhead box protein B2 OS=Mus musculus GN=Foxb2 PE=2 SV=1	FOXB2_MOUSE	Foxb2 Fkh4	0	0	0	0	0	0	0	0	0	0	0	0	0	0	0	0	0	1	0	1	0	0	0	0	0.00414868	0.629	#DIV/0!	0.0068583	0.529	#DIV/0!	0.0655922	0.955
Q66L42	Mitogen-activated protein kinase kinase kinase 10 OS=Mus musculus GN=Map3k10 PE=2 SV=2	M3K10_MOUSE	Map3k10	0	0	0	0	0	0	0	0	0	0	0	0	0	0	0	0	0	1	0	0	0	0	0	1	0.00414868	0.629	#DIV/0!	0.000907433	0.569	#DIV/0!	0.0848067	0.986
Q6TDP3	Kelch-like protein 17 OS=Mus musculus GN=Klhl17 PE=2 SV=1	KLH17_MOUSE	Klhl17	0	0	0	0	0	0	0	0	0	0	0	0	0	0	0	0	0	1	0	0	0	0	0	1	0.00414868	0.629	#DIV/0!	0.000907433	0.569	#DIV/0!	0.0848067	0.986
Q8BUE1	Sodium/hydrogen exchanger 4 OS=Mus musculus GN=Slc9a4 PE=2 SV=1	SL9A4_MOUSE	Slc9a4 Nhe4	0	0	0	0	0	0	0	0	0	0	0	0	0	0	0	0	0	1	0	0	0	1	0	0	0.00414868	0.629	#DIV/0!	0.00214747	0.557	#DIV/0!	0.0786084	0.986
Q99KW3	Isoform 5 of TRIO and F-actin-binding protein OS=Mus musculus GN=Triobp	TARA_MOUSE	Triobp Kiaa1662 Tara	0	0	0	0	0	0	0	0	0	0	0	0	0	0	0	0	0	1	0	1	0	0	0	0	0.00414868	0.629	#DIV/0!	0.0068583	0.529	#DIV/0!	0.0655922	0.955
A2AR02	Peptidyl-prolyl cis-trans isomerase G OS=Mus musculus GN=Ppig PE=2 SV=1	PPIG_MOUSE	Ppig	0	0	0	0	0	0	0	0	0	0	0	0	0	0	0	0	0	0	1	0	0	0	1	0	0.166667	0	#DIV/0!	0.17203	1.039	#DIV/0!	0.0992731	0.997
Q61324	Isoform 2 of Aryl hydrocarbon receptor nuclear translocator 2 OS=Mus musculus GN=Arnt2	ARNT2_MOUSE	Arnt2 Kiaa0307	0	0	0	0	0	0	0	0	0	0	0	0	0	0	0	0	0	0	1	0	0	1	0	0	0.166667	0	#DIV/0!	0.158617	1.026	#DIV/0!	0.0912923	0.997
Q62141	Isoform 1 of Paired amphipathic helix protein Sin3b OS=Mus musculus GN=Sin3b	SIN3B_MOUSE	Sin3b Kiaa0700	0	0	0	0	0	0	0	0	0	0	0	0	0	0	0	0	0	0	1	0	1	0	0	0	0.166667	0	#DIV/0!	0.138871	1.005	#DIV/0!	0.0795997	0.997
Q66JV4	RNA-binding protein 12B-A OS=Mus musculus GN=Rbm12b1 PE=1 SV=2	R12BB_MOUSE	Rbm12b2 Rbm12bb	0	0	0	0	0	0	0	0	0	0	0	0	0	0	0	0	0	0	1	0	1	0	0	0	0.166667	0	#DIV/0!	0.138871	1.005	#DIV/0!	0.0795997	0.997
Q6ZQ93	Isoform 4 of Ubiquitin carboxyl-terminal hydrolase 34 OS=Mus musculus GN=Usp34	UBP34_MOUSE	Usp34 Kiaa0570 Murr2	0	0	0	0	0	0	0	0	0	0	0	0	0	0	0	0	0	0	1	1	0	0	0	0	0.166667	0	#DIV/0!	0.134972	1	#DIV/0!	0.0772994	1.94
Q6ZQB6	Isoform 3 of Inositol hexakisphosphate and diphosphoinositol-pentakisphosphate kinase 2 OS=Mus musculus GN=Ppip5k2	VIP2_MOUSE	Ppip5k2 Hisppd1 Kiaa0433 Vip2	0	0	0	0	0	0	0	0	0	0	0	0	0	0	0	0	0	0	1	0	0	1	0	0	0.166667	0	#DIV/0!	0.158617	1.026	#DIV/0!	0.0912923	0.997
A2AQP0	Myosin-7B OS=Mus musculus GN=Myh7b PE=3 SV=1	MYH7B_MOUSE	Myh7b	0	0	0	0	0	0	0	0	0	0	0	0	0	0	0	0	0	0	0	1	0	0	0	1	0.166667	0	#DIV/0!	0.0645151	0.957	#DIV/0!	0.0362707	0.529
O35188	Fractalkine OS=Mus musculus GN=Cx3cl1 PE=2 SV=3	X3CL1_MOUSE	Cx3cl1 Cx3c Fkn Scyd1	0	0	0	0	0	0	0	0	0	0	0	0	0	0	0	0	0	0	0	1	1	0	0	0	0.166667	0	#DIV/0!	0.0450563	0.932	#DIV/0!	0.025156	0.529
P70257	Isoform 7 of Nuclear factor 1 A-type OS=Mus musculus GN=Nfia	NFIX_MOUSE	Nfix	0	0	0	0	0	0	0	0	0	0	0	0	0	0	0	0	0	0	0	1	0	1	0	0	0.166667	0	#DIV/0!	0.0573224	0.949	#DIV/0!	0.0321493	0.529
Q08189	Protein-glutamine gamma-glutamyltransferase E OS=Mus musculus GN=Tgm3 PE=1 SV=2	TGM3_MOUSE	Tgm3 Tgase3	0	0	0	0	0	0	0	0	0	0	0	0	0	0	0	0	0	0	0	1	0	0	0	1	0.166667	0	#DIV/0!	0.0645151	0.957	#DIV/0!	0.0362707	0.529
Q62130	Tyrosine-protein phosphatase non-receptor type 14 OS=Mus musculus GN=Ptpn14 PE=2 SV=2	PTN14_MOUSE	Ptpn14	0	0	0	0	0	0	0	0	0	0	0	0	0	0	0	0	0	0	0	1	0	0	0	1	0.166667	0	#DIV/0!	0.0645151	0.957	#DIV/0!	0.0362707	0.529
Q8BLI4	Dermatan-sulfate epimerase OS=Mus musculus GN=Dse PE=2 SV=1	DSE_MOUSE	Dse Sart2	0	0	0	0	0	0	0	0	0	0	0	0	0	0	0	0	0	0	0	2	0	0	0	0	0.166667	0	#DIV/0!	0.0427152	0.692	#DIV/0!	0.0238266	0.99
Q8BU04	Putative E3 ubiquitin-protein ligase UBR7 OS=Mus musculus GN=Ubr7 PE=2 SV=1	UBR7_MOUSE	Ubr7	0	0	0	0	0	0	0	0	0	0	0	0	0	0	0	0	0	0	0	2	0	0	0	0	0.166667	0	#DIV/0!	0.0427152	0.692	#DIV/0!	0.0238266	0.99
P16546	Isoform 2 of Spectrin alpha chain, non-erythrocytic 1 OS=Mus musculus GN=Sptan1	SPTN1_MOUSE	Sptan1 Spna2 Spta2	0	0	0	0	0	0	0	0	0	0	0	0	0	0	0	0	0	0	0	0	1	0	1	0	0.166667	0	#DIV/0!	0.0688468	0.963	#DIV/0!	0.0387597	0.534
P21107-2	Isoform 2 of Tropomyosin alpha-3 chain OS=Mus musculus GN=Tpm3	TPM3_MOUSE	Tpm3 Tpm-5 Tpm5	0	0	0	0	0	0	0	0	0	0	0	0	0	0	0	0	0	0	0	0	2	0	0	0	0.166667	0	#DIV/0!	0.0474549	0.696	#DIV/0!	0.0265198	0.534
P59532	Taste receptor type 2 member 41 OS=Mus musculus GN=Tas2r41 PE=2 SV=1	T2R41_MOUSE	Tas2r41 Tas2r12 Tas2r126 Tas2r26	0	0	0	0	0	0	0	0	0	0	0	0	0	0	0	0	0	0	0	0	1	0	0	1	0.166667	0	#DIV/0!	0.0673349	0.961	#DIV/0!	0.0378904	0.534
P99024	Tubulin beta-5 chain OS=Mus musculus GN=Tubb5 PE=1 SV=1	TBB5_MOUSE	Tubb5	0	0	0	0	0	0	0	0	0	0	0	0	0	0	0	0	0	0	0	0	2	0	0	0	0.166667	0	#DIV/0!	0.0474549	0.696	#DIV/0!	0.0265198	0.534
Q61329	Zinc finger homeobox protein 3 OS=Mus musculus GN=Zfhx3 PE=1 SV=1	ZFHX3_MOUSE	Zfhx3 Atbf1	0	0	0	0	0	0	0	0	0	0	0	0	0	0	0	0	0	0	0	0	1	0	0	1	0.166667	0	#DIV/0!	0.0673349	0.961	#DIV/0!	0.0378904	0.534
Q9EQZ7	Isoform 3 of Regulating synaptic membrane exocytosis protein 2 OS=Mus musculus GN=Rims2	RIMS2_MOUSE	Rims2 Rab3ip2 Rim2	0	0	0	0	0	0	0	0	0	0	0	0	0	0	0	0	0	0	0	0	1	0	0	1	0.166667	0	#DIV/0!	0.0673349	0.961	#DIV/0!	0.0378904	0.534
Q9QX29	Short transient receptor potential channel 5 OS=Mus musculus GN=Trpc5 PE=1 SV=2	TRPC5_MOUSE	Trpc5 Trp5 Trrp5	0	0	0	0	0	0	0	0	0	0	0	0	0	0	0	0	0	0	0	0	1	0	0	1	0.166667	0	#DIV/0!	0.0673349	0.961	#DIV/0!	0.0378904	0.534
A2AGT5	Isoform 3 of Cytoskeleton-associated protein 5 OS=Mus musculus GN=Ckap5	CKAP5_MOUSE	Ckap5	0	0	0	0	0	0	0	0	0	0	0	0	0	0	0	0	0	0	0	0	0	2	0	0	0.166667	0	#DIV/0!	0.0738612	0.716	#DIV/0!	0.0416471	0.534
P10751	Zinc finger protein 11 OS=Mus musculus GN=Zfp11 PE=2 SV=2	ZFP11_MOUSE	Zfp11 Krox-6.1a Krox-6.1b	0	0	0	0	0	0	0	0	0	0	0	0	0	0	0	0	0	0	0	0	0	1	1	0	0.166667	0	#DIV/0!	0.0835489	0.981	#DIV/0!	0.0472435	0.534
P18826	Isoform 2 of Phosphorylase b kinase regulatory subunit alpha, skeletal muscle isoform OS=Mus musculus GN=Phka1	KPB1_MOUSE	Phka1	0	0	0	0	0	0	0	0	0	0	0	0	0	0	0	0	0	0	0	0	0	1	1	0	0.166667	0	#DIV/0!	0.0835489	0.981	#DIV/0!	0.0472435	0.534
P28700	Retinoic acid receptor RXR-alpha OS=Mus musculus GN=Rxra PE=1 SV=1	RXRA_MOUSE	Rxra Nr2b1	0	0	0	0	0	0	0	0	0	0	0	0	0	0	0	0	0	0	0	0	0	1	1	0	0.166667	0	#DIV/0!	0.0835489	0.981	#DIV/0!	0.0472435	0.534
Q52KG5	Kinesin-like protein KIF26A OS=Mus musculus GN=Kif26a PE=1 SV=2	KI26A_MOUSE	Kif26a Kiaa1236	0	0	0	0	0	0	0	0	0	0	0	0	0	0	0	0	0	0	0	0	0	2	0	0	0.166667	0	#DIV/0!	0.0738612	0.716	#DIV/0!	0.0416471	0.534
Q62159	Rho-related GTP-binding protein RhoC OS=Mus musculus GN=Rhoc PE=1 SV=2	RHOC_MOUSE	Rhoc Arhc	0	0	0	0	0	0	0	0	0	0	0	0	0	0	0	0	0	0	0	0	0	1	0	1	0.166667	0	#DIV/0!	0.0818987	0.979	#DIV/0!	0.0462885	0.534
Q6PB97	Isoform 3 of F-box/LRR-repeat protein 19 OS=Mus musculus GN=Fbxl19	FXL19_MOUSE	Fbxl19	0	0	0	0	0	0	0	0	0	0	0	0	0	0	0	0	0	0	0	0	0	1	0	1	0.166667	0	#DIV/0!	0.0818987	0.979	#DIV/0!	0.0462885	0.534
Q7JJ13	Isoform 2 of Bromodomain-containing protein 2 OS=Mus musculus GN=Brd2	BRD2_MOUSE	Brd2 Fsrg1 Kiaa4005 Ring3	0	0	0	0	0	0	0	0	0	0	0	0	0	0	0	0	0	0	0	0	0	1	1	0	0.166667	0	#DIV/0!	0.0835489	0.981	#DIV/0!	0.0472435	0.534
Q8BJL0	Isoform 4 of SWI/SNF-related matrix-associated actin-dependent regulator of chromatin subfamily A-like protein 1 OS=Mus musculus GN=Smarcal1	SMAL1_MOUSE	Smarcal1 Harp	0	0	0	0	0	0	0	0	0	0	0	0	0	0	0	0	0	0	0	0	0	1	1	0	0.166667	0	#DIV/0!	0.0835489	0.981	#DIV/0!	0.0472435	0.534
Q9QZ05	Isoform 6 of Eukaryotic translation initiation factor 2-alpha kinase 4 OS=Mus musculus GN=Eif2ak4	E2AK4_MOUSE	Eif2ak4 Gcn2 Kiaa1338	0	0	0	0	0	0	0	0	0	0	0	0	0	0	0	0	0	0	0	0	0	1	0	1	0.166667	0	#DIV/0!	0.0818987	0.979	#DIV/0!	0.0462885	0.534
Q9Z1T6	Isoform 2 of 1-phosphatidylinositol 3-phosphate 5-kinase OS=Mus musculus GN=Pikfyve	FYV1_MOUSE	Pikfyve Kiaa0981 Pip5k3	0	0	0	0	0	0	0	0	0	0	0	0	0	0	0	0	0	0	0	0	0	1	0	1	0.166667	0	#DIV/0!	0.0818987	0.979	#DIV/0!	0.0462885	0.534
P26187	Methylated-DNA--protein-cysteine methyltransferase OS=Mus musculus GN=Mgmt PE=1 SV=3	MGMT_MOUSE	Mgmt	0	0	0	0	0	0	0	0	0	0	0	0	0	0	0	0	0	0	0	0	0	0	1	1	0.166667	0	#DIV/0!	0.0920289	0.99	#DIV/0!	0.0521607	0.534
Q5SXY1	Isoform 4 of Cytospin-B OS=Mus musculus GN=Specc1	CYTSB_MOUSE	Specc1 Cytsb Kiaa4061	0	0	0	0	0	0	0	0	0	0	0	0	0	0	0	0	0	0	0	0	0	0	1	1	0.166667	0	#DIV/0!	0.0920289	0.99	#DIV/0!	0.0521607	0.534
Q99MR1	PERQ amino acid-rich with GYF domain-containing protein 1 OS=Mus musculus GN=Gigyf1 PE=1 SV=2	PERQ1_MOUSE	Gigyf1 Kiaa4110 Perq1	0	0	0	0	0	0	0	0	0	0	0	0	0	0	0	0	0	0	0	0	0	0	1	1	0.166667	0	#DIV/0!	0.0920289	0.99	#DIV/0!	0.0521607	0.534
Q6NZQ6	Isoform 3 of Zinc finger protein 740 OS=Mus musculus GN=Znf740	ZN740_MOUSE	Znf740 Zfp740	0	0	0	0	0	0	0	0	0	0	0	0	0	0	0	0	0	0	0	0	0	0	0	2	0.166667	0	#DIV/0!	0.0903056	0.725	#DIV/0!	0.05116	0.534
Q9DAM2	EF-hand calcium-binding domain-containing protein 9 OS=Mus musculus GN=Efcab9 PE=2 SV=2	EFCB9_MOUSE	Efcab9	0	0	0	0	0	0	0	0	0	0	0	0	0	0	0	0	0	0	0	0	0	0	0	2	0.166667	0	#DIV/0!	0.0903056	0.725	#DIV/0!	0.05116	0.534
Q8BM88	Cathepsin O OS=Mus musculus GN=Ctso PE=2 SV=1	CATO_MOUSE	Ctso	1	1	0	0	1	0	1	1	1	1	1	1	1	2	1	0	1	1	2	1	0	1	1	2	0.436953	1.14	2	0.0258086	0.582	1.16667	0.54982	1.358
P01801	Ig heavy chain V-III region J606 OS=Mus musculus PE=1 SV=1	HVM32_MOUSE	0	0	0	2	0	5	1	0	0	0	0	1	0	0	2	1	4	6	0	0	0	0	0	0	0	1.36487	0.871	1.625	4.33116e-05	-0.585	0	0.779387	0.657
P06797	Cathepsin L1 OS=Mus musculus GN=Ctsl PE=1 SV=2	CATL1_MOUSE	Ctsl Ctsl1	8	4	7	4	7	3	1	3	2	1	1	1	9	10	7	5	5	5	0	1	2	2	1	1	1.23143	1.116	1.24242	0.00756525	-0.525	0.777778	0.775124	0.533
P18337	L-selectin OS=Mus musculus GN=Sell PE=2 SV=1	LYAM1_MOUSE	Sell Lnhr Ly-22 Ly22	8	9	9	6	4	6	10	11	9	13	12	9	8	5	7	6	6	5	2	7	8	16	11	9	0.156494	-0.585	0.880952	0.611457	-0.779	0.828125	0.823472	-1.025
Q60675	Laminin subunit alpha-2 OS=Mus musculus GN=Lama2 PE=1 SV=2	LAMA2_MOUSE	Lama2	0	0	0	0	1	0	0	1	1	0	0	0	0	0	1	1	0	0	0	0	2	1	0	1	0.0706298	0.694	2	0.0915868	0.777	2	0.389305	1.165
P09813	Apolipoprotein A-II OS=Mus musculus GN=Apoa2 PE=1 SV=2	APOA2_MOUSE	Apoa2	100	208	237	158	200	137	327	676	583	628	558	457	86	277	148	187	258	185	196	753	371	579	554	545	12.3024	0.767	1.09712	1.6953	-0.25	0.928461	0.80398	0
P20029	78 kDa glucose-regulated protein OS=Mus musculus GN=Hspa5 PE=1 SV=3	GRP78_MOUSE	Hspa5 Grp78	32	33	26	25	38	22	19	25	25	25	22	23	26	21	25	22	27	23	15	19	29	31	20	24	2.38386	-1.688	0.818182	0.0483859	0.359	0.992806	1.04051	-0.744
Q62465	Synaptic vesicle membrane protein VAT-1 homolog OS=Mus musculus GN=Vat1 PE=1 SV=3	VAT1_MOUSE	Vat1 Vat-1	6	4	10	2	3	1	2	2	0	1	1	2	6	1	3	2	3	2	3	1	1	1	2	1	1.28153	-0.886	0.653846	0.0226627	0.41	1.125	0.581659	-0.584
P12399	Protein CTLA-2-alpha OS=Mus musculus GN=Ctla2a PE=2 SV=2	CTL2A_MOUSE	Ctla2a	2	2	0	0	2	0	1	0	1	0	0	1	0	2	0	0	0	0	1	1	1	0	0	0	0.656998	-0.887	0.333333	0.0682853	0.044	1	0.347919	-0.8
Q62188	Dihydropyrimidinase-related protein 3 OS=Mus musculus GN=Dpysl3 PE=1 SV=1	DPYL3_MOUSE	Dpysl3 Drp3 Ulip	0	1	1	4	2	0	0	0	0	1	0	0	0	1	1	2	1	0	0	0	0	0	0	0	0.235714	-0.501	0.625	0.00361423	-0.547	0	0.337521	-0.571
Q9JHH6	Carboxypeptidase B2 OS=Mus musculus GN=Cpb2 PE=1 SV=1	CBPB2_MOUSE	Cpb2 Tafi	44	30	31	29	37	32	35	40	48	38	38	37	27	24	25	33	39	40	27	33	30	43	39	38	0.397477	-0.435	0.926108	0.26999	-0.665	0.889831	0.721573	-0.678
P51910	Apolipoprotein D OS=Mus musculus GN=Apod PE=2 SV=1	APOD_MOUSE	Apod	11	12	8	11	18	15	14	16	9	10	10	12	9	6	6	12	14	10	9	18	12	15	7	9	2.01191	-1.432	0.76	0.000728537	0.064	0.985915	1.02169	-1.03
P02319	Sperm protamine P1 OS=Mus musculus GN=Prm1 PE=1 SV=2	HSP1_MOUSE	Prm1 Prm-1	1	0	2	0	0	0	0	1	0	1	0	0	0	0	0	0	2	0	0	0	0	0	0	0	0.0376377	-0.468	0.666667	0.0399631	-0.92	0	0.258092	-0.875
P37804	Transgelin OS=Mus musculus GN=Tagln PE=1 SV=3	TAGL_MOUSE	Tagln Sm22 Sm22a	2	0	0	1	1	1	0	0	0	0	0	0	2	0	0	0	0	0	0	0	0	0	0	0	0.555863	-0.927	0.4	0.166667	0	#DIV/0!	0.394456	-0.843
Q61809	Leucine-rich repeat neuronal protein 1 OS=Mus musculus GN=Lrrn1 PE=2 SV=1	LRRN1_MOUSE	Lrrn1 Kiaa1497	1	1	0	0	0	0	1	1	1	0	0	0	0	0	2	0	0	0	0	0	0	0	0	0	0.0902244	0	1	0.247315	-1.334	0	0.108707	-0.648
Q62426	Cystatin-B OS=Mus musculus GN=Cstb PE=1 SV=1	CYTB_MOUSE	Cstb Cst6 Stfb	1	2	1	0	0	1	0	0	0	0	0	0	1	0	0	1	0	0	0	0	0	0	0	0	0.321357	-0.93	0.4	0.166667	0	#DIV/0!	0.227347	-0.805
Q6F3F9	G-protein coupled receptor 126 OS=Mus musculus GN=Gpr126 PE=1 SV=1	GP126_MOUSE	Gpr126 Dreg Gm222	1	2	1	0	0	0	1	0	0	0	0	0	0	1	0	1	0	0	0	0	0	0	0	0	0.0553753	-0.523	0.5	0.000229531	-0.598	0	0.177034	-0.742
Q91XE9	Cyclic AMP-responsive element-binding protein 3-like protein 3 OS=Mus musculus GN=Creb3l3 PE=2 SV=1	CR3L3_MOUSE	Creb3l3 Crebh	0	0	0	1	1	1	0	0	0	0	1	1	0	0	0	0	0	0	0	0	0	0	1	1	0.675027	-1.518	0	0.0779136	-0.052	1	0.366086	-1.192
P11438	Lysosome-associated membrane glycoprotein 1 OS=Mus musculus GN=Lamp1 PE=1 SV=2	LAMP1_MOUSE	Lamp1 Lamp-1	3	2	0	3	3	2	3	3	1	0	0	1	1	0	2	1	2	0	2	2	2	0	3	0	2.12538	-1.698	0.461538	0.0136633	0.313	1.125	0.782452	-1.013
P03991	H-2 class I histocompatibility antigen, K-W28 alpha chain OS=Mus musculus GN=H2-K1 PE=1 SV=2	HA1W_MOUSE	H2-K1 H2-K	0	0	2	0	0	2	0	3	3	4	4	3	0	0	2	0	0	2	2	3	0	0	6	0	0.0306446	0	1	0.300791	-0.569	0.647059	0.1618	-0.426
O35955	Proteasome subunit beta type-10 OS=Mus musculus GN=Psmb10 PE=1 SV=1	PSB10_MOUSE	Psmb10 Lmp10 Mecl1	1	3	2	0	2	1	2	4	4	3	2	4	2	4	2	0	1	2	5	4	5	1	4	3	0.20813	0.603	1.22222	0.305178	0.86	1.15789	0.696235	1.022
O70566	Protein diaphanous homolog 2 OS=Mus musculus GN=Diaph2 PE=1 SV=2	DIAP2_MOUSE	Diaph2 Diap2	1	0	0	0	0	0	0	0	0	0	0	1	0	0	0	0	0	0	0	0	0	0	0	0	0.0176909	-0.663	0	8.22406e-06	-0.587	0	0.127592	-1.02
P10853	Isoform 2 of Histone H2B type 1-P OS=Mus musculus GN=Hist1h2bp	H2B1F_MOUSE	Hist1h2bf H2b-f; Hist1h2bj H2b-j; Hist1h2bl H2b-l; Hist1h2bn H2b-n	1	0	0	1	0	0	0	0	0	0	0	0	0	0	0	0	0	0	0	0	0	0	0	0	0.363389	-1.135	0	0.166667	0	#DIV/0!	0.215939	-1.081
Q3UND0	Isoform 2 of Src kinase-associated phosphoprotein 2 OS=Mus musculus GN=Skap2	SKAP2_MOUSE	Skap2 Prap Ra70 Saps Scap2 Skap55r	1	1	0	0	0	0	0	0	0	0	0	0	0	0	0	0	0	0	0	0	0	0	0	0	0.256243	-1.091	0	0.166667	0	#DIV/0!	0.150018	-1.041
Q570Y9	Isoform 3 of DEP domain-containing mTOR-interacting protein OS=Mus musculus GN=Deptor	DPTOR_MOUSE	Deptor Depdc6 Kiaa4200	1	1	0	0	0	0	0	0	0	0	0	0	0	0	0	0	0	0	0	0	0	0	0	0	0.256243	-1.091	0	0.166667	0	#DIV/0!	0.150018	-1.041
Q61789	Isoform A of Laminin subunit alpha-3 OS=Mus musculus GN=Lama3	LAMA3_MOUSE	Lama3	1	1	0	0	0	0	0	0	0	0	0	0	0	0	0	0	0	0	0	0	0	0	0	0	0.256243	-1.091	0	0.166667	0	#DIV/0!	0.150018	-1.041
Q8QZV4	Serine/threonine-protein kinase 32C OS=Mus musculus GN=Stk32c PE=2 SV=1	ST32C_MOUSE	Stk32c Pkek MNCb-1563	1	0	0	0	0	1	0	0	0	0	0	0	0	0	0	0	0	0	0	0	0	0	0	0	0.293749	-1.11	0	0.166667	0	#DIV/0!	0.172934	-1.058
Q8VCM3	Zinc finger FYVE domain-containing protein 21 OS=Mus musculus GN=Zfyve21 PE=2 SV=2	ZFY21_MOUSE	Zfyve21	1	0	0	0	0	0	0	0	0	1	0	0	0	0	0	0	0	0	0	0	0	0	0	0	0.0176909	-0.663	0	0.00361423	-0.547	0	0.101992	-0.578
Q8VCY6	U3 small nucleolar RNA-associated protein 6 homolog OS=Mus musculus GN=Utp6 PE=2 SV=1	UTP6_MOUSE	Utp6 Mhat	1	0	0	0	0	0	1	0	0	0	0	0	0	0	0	0	0	0	0	0	0	0	0	0	0.0176909	-0.663	0	0.000229531	-0.598	0	0.136307	-1.029
Q99KE8	Isoform 3 of Zinc finger protein 64 OS=Mus musculus GN=Zfp64	ZFP64_MOUSE	Zfp64	1	0	0	0	0	0	0	0	1	0	0	0	0	0	0	0	0	0	0	0	0	0	0	0	0.0176909	-0.663	0	0.013572	-0.5	0	0.0798195	-0.949
Q9QUR8	Semaphorin-7A OS=Mus musculus GN=Sema7a PE=1 SV=1	SEM7A_MOUSE	Sema7a Cd108 Semal Semk1	1	1	0	0	0	0	0	0	0	0	0	0	0	0	0	0	0	0	0	0	0	0	0	0	0.256243	-1.091	0	0.166667	0	#DIV/0!	0.150018	-1.041
P20108	Thioredoxin-dependent peroxide reductase, mitochondrial OS=Mus musculus GN=Prdx3 PE=1 SV=1	PRDX3_MOUSE	Prdx3 Aop1 Mer5	0	1	0	1	0	0	0	0	0	0	0	0	0	0	0	0	0	0	0	0	0	0	0	0	0.277286	-1.096	0	0.166667	0	#DIV/0!	0.162853	-1.047
P28740	Isoform 2 of Kinesin-like protein KIF2A OS=Mus musculus GN=Kif2a	KIF2A_MOUSE	Kif2a Kif2 Kns2	0	2	0	0	0	0	0	0	0	0	0	0	0	0	0	0	0	0	0	0	0	0	0	0	0.18254	-0.763	0	0.166667	0	#DIV/0!	0.105548	-0.761
P30412	Peptidyl-prolyl cis-trans isomerase C OS=Mus musculus GN=Ppic PE=1 SV=1	PPIC_MOUSE	Ppic Cypc	0	2	0	0	0	0	0	0	0	0	0	0	0	0	0	0	0	0	0	0	0	0	0	0	0.18254	-0.763	0	0.166667	0	#DIV/0!	0.105548	-0.761
Q03137	Isoform Short of Ephrin type-A receptor 4 OS=Mus musculus GN=Epha4	EPHA4_MOUSE	Epha4 Sek Sek1	0	1	0	0	0	0	0	1	0	0	0	0	0	0	0	0	0	0	0	0	0	0	0	0	0.00178472	-0.617	0	0.0128422	-0.503	0	0.0485614	-0.928
Q04859	Isoform 3 of Serine/threonine-protein kinase MAK OS=Mus musculus GN=Mak	MAK_MOUSE	Mak Rck	0	1	0	0	0	0	0	0	0	1	0	0	0	0	0	0	0	0	0	0	0	0	0	0	0.00178472	-0.617	0	0.00361423	-0.547	0	0.0654085	-0.962
Q3UVV9	von Willebrand factor A domain-containing protein 3A OS=Mus musculus GN=Vwa3a PE=2 SV=1	VWA3A_MOUSE	Vwa3a	0	1	0	0	0	0	1	0	0	0	0	0	0	0	0	0	0	0	0	0	0	0	0	0	0.00178472	-0.617	0	0.000229531	-0.598	0	0.0939105	-1.001
Q3V1G4	Olfactomedin-like protein 2B OS=Mus musculus GN=Olfml2b PE=1 SV=2	OLM2B_MOUSE	Olfml2b	0	1	0	0	0	0	1	0	0	0	0	0	0	0	0	0	0	0	0	0	0	0	0	0	0.00178472	-0.617	0	0.000229531	-0.598	0	0.0939105	-1.001
Q5DU37	Isoform 2 of Zinc finger FYVE domain-containing protein 26 OS=Mus musculus GN=Zfyve26	ZFY26_MOUSE	Zfyve26 Kiaa0321	0	1	0	0	0	0	0	0	0	0	0	1	0	0	0	0	0	0	0	0	0	0	0	0	0.00178472	-0.617	0	8.22406e-06	-0.587	0	0.0865796	-0.993
Q6RT24	Centromere-associated protein E OS=Mus musculus GN=Cenpe PE=1 SV=1	CENPE_MOUSE	Cenpe	0	1	0	0	0	0	0	0	0	0	1	0	0	0	0	0	0	0	0	0	0	0	0	0	0.00178472	-0.617	0	4.33116e-05	-0.585	0	0.0851089	-0.991
Q6Y7W8	PERQ amino acid-rich with GYF domain-containing protein 2 OS=Mus musculus GN=Gigyf2 PE=1 SV=2	PERQ2_MOUSE	Gigyf2 Kiaa0642 Perq2 Tnrc15	0	1	0	0	0	0	1	0	0	0	0	0	0	0	0	0	0	0	0	0	0	0	0	0	0.00178472	-0.617	0	0.000229531	-0.598	0	0.0939105	-1.001
Q8BKG3	Inactive tyrosine-protein kinase 7 OS=Mus musculus GN=Ptk7 PE=1 SV=1	PTK7_MOUSE	Ptk7	0	1	0	0	0	0	0	0	0	1	0	0	0	0	0	0	0	0	0	0	0	0	0	0	0.00178472	-0.617	0	0.00361423	-0.547	0	0.0654085	-0.962
Q8BX94	Oxysterol-binding protein-related protein 2 OS=Mus musculus GN=Osbpl2 PE=2 SV=1	OSBL2_MOUSE	Osbpl2	0	1	0	0	0	0	0	0	0	1	0	0	0	0	0	0	0	0	0	0	0	0	0	0	0.00178472	-0.617	0	0.00361423	-0.547	0	0.0654085	-0.962
Q8CH25	Isoform 2 of SAFB-like transcription modulator OS=Mus musculus GN=Sltm	SLTM_MOUSE	Sltm Met	0	1	0	0	0	0	0	0	0	1	0	0	0	0	0	0	0	0	0	0	0	0	0	0	0.00178472	-0.617	0	0.00361423	-0.547	0	0.0654085	-0.962
Q8R089	Probable fibrosin-1 OS=Mus musculus GN=Fbrs PE=1 SV=2	FBRS_MOUSE	Fbrs Fbs Fbs1	0	1	0	0	1	0	0	0	0	0	0	0	0	0	0	0	0	0	0	0	0	0	0	0	0.124168	-1.015	0	0.166667	0	#DIV/0!	0.0709397	-0.971
Q8VBW5	Isoform 4 of HMG box transcription factor BBX OS=Mus musculus GN=Bbx	BBX_MOUSE	Bbx Hbp2	0	1	0	0	0	0	0	0	0	1	0	0	0	0	0	0	0	0	0	0	0	0	0	0	0.00178472	-0.617	0	0.00361423	-0.547	0	0.0654085	-0.962
Q99246	Isoform 3 of Voltage-dependent L-type calcium channel subunit alpha-1D OS=Mus musculus GN=Cacna1d	CAC1D_MOUSE	Cacna1d Cach3 Cacn4 Cacnl1a2 Cchl1a2	0	1	0	1	0	0	0	0	0	0	0	0	0	0	0	0	0	0	0	0	0	0	0	0	0.277286	-1.096	0	0.166667	0	#DIV/0!	0.162853	-1.047
Q9D020	Cytosolic 5'-nucleotidase 3A OS=Mus musculus GN=Nt5c3a PE=1 SV=4	5NT3A_MOUSE	Nt5c3a Nt5c3	0	1	0	0	0	0	0	0	0	1	0	0	0	0	0	0	0	0	0	0	0	0	0	0	0.00178472	-0.617	0	0.00361423	-0.547	0	0.0654085	-0.962
Q9DAR1-2	Isoform 2 of CKLF-like MARVEL transmembrane domain-containing protein 2A OS=Mus musculus GN=Cmtm2a	CLF2A_MOUSE	Cmtm2a Cklfsf2a	0	1	0	0	0	0	0	1	0	0	0	0	0	0	0	0	0	0	0	0	0	0	0	0	0.00178472	-0.617	0	0.0128422	-0.503	0	0.0485614	-0.928
Q9EQT6	Synaptotagmin-13 OS=Mus musculus GN=Syt13 PE=1 SV=1	SYT13_MOUSE	Syt13 Kiaa1427	0	1	0	0	0	0	0	0	0	0	0	1	0	0	0	0	0	0	0	0	0	0	0	0	0.00178472	-0.617	0	8.22406e-06	-0.587	0	0.0865796	-0.993
A2AL36	Isoform 2 of Centriolin OS=Mus musculus GN=Cntrl	CNTRL_MOUSE	Cntrl Cep1 Cep110	0	0	1	1	0	0	0	0	0	0	0	0	0	0	0	0	0	0	0	0	0	0	0	0	0.247901	-1.078	0	0.166667	0	#DIV/0!	0.144945	-1.03
O54879	High mobility group protein B3 OS=Mus musculus GN=Hmgb3 PE=2 SV=3	HMGB3_MOUSE	Hmgb3 Hmg2a Hmg4	0	0	1	0	0	0	0	0	1	0	0	0	0	0	0	0	0	0	0	0	0	0	0	0	6.29554e-05	-0.596	0	0.013572	-0.5	0	0.037734	-0.914
P14115	60S ribosomal protein L27a OS=Mus musculus GN=Rpl27a PE=2 SV=5	RL27A_MOUSE	Rpl27a	0	0	2	0	0	0	0	0	0	0	0	0	0	0	0	0	0	0	0	0	0	0	0	0	0.135023	-0.747	0	0.166667	0	#DIV/0!	0.0773295	-0.745
P62702	40S ribosomal protein S4, X isoform OS=Mus musculus GN=Rps4x PE=2 SV=2	RS4X_MOUSE	Rps4x Rps4	0	0	2	0	0	0	0	0	0	0	0	0	0	0	0	0	0	0	0	0	0	0	0	0	0.135023	-0.747	0	0.166667	0	#DIV/0!	0.0773295	-0.745
P69566	Isoform 2 of Ran-binding protein 9 OS=Mus musculus GN=Ranbp9	RANB9_MOUSE	Ranbp9 Ranbpm	0	0	1	0	0	0	0	1	0	0	0	0	0	0	0	0	0	0	0	0	0	0	0	0	6.29554e-05	-0.596	0	0.0128422	-0.503	0	0.0385597	-0.916
P70232-2	Isoform 2 of Neural cell adhesion molecule L1-like protein OS=Mus musculus GN=Chl1	NCHL1_MOUSE	Chl1 Call	0	0	2	0	0	0	0	0	0	0	0	0	0	0	0	0	0	0	0	0	0	0	0	0	0.135023	-0.747	0	0.166667	0	#DIV/0!	0.0773295	-0.745
P86048	60S ribosomal protein L10 OS=Mus musculus GN=Rpl10 PE=1 SV=3	RL10L_MOUSE	Rpl10l	0	0	1	0	0	0	0	0	0	1	0	0	0	0	0	0	0	0	0	0	0	0	0	0	6.29554e-05	-0.596	0	0.00361423	-0.547	0	0.0538155	-0.95
Q3TL44	NLR family member X1 OS=Mus musculus GN=Nlrx1 PE=2 SV=1	NLRX1_MOUSE	Nlrx1	0	0	1	0	0	0	0	1	0	0	0	0	0	0	0	0	0	0	0	0	0	0	0	0	6.29554e-05	-0.596	0	0.0128422	-0.503	0	0.0385597	-0.916
Q569L8	Centromere protein J OS=Mus musculus GN=Cenpj PE=2 SV=2	CENPJ_MOUSE	Cenpj	0	0	1	0	1	0	0	0	0	0	0	0	0	0	0	0	0	0	0	0	0	0	0	0	0.103566	-1.002	0	0.166667	0	#DIV/0!	0.0588765	-0.959
Q5DU05	Isoform 3 of Centrosomal protein of 164 kDa OS=Mus musculus GN=Cep164	CE164_MOUSE	Cep164 Kiaa1052	0	0	1	0	0	1	0	0	0	0	0	0	0	0	0	0	0	0	0	0	0	0	0	0	0.188974	-1.059	0	0.166667	0	#DIV/0!	0.109398	-1.012
Q64018	Isoform b of Glycine receptor subunit alpha-1 OS=Mus musculus GN=Glra1	GLRA1_MOUSE	Glra1	0	0	1	0	0	0	0	0	1	0	0	0	0	0	0	0	0	0	0	0	0	0	0	0	6.29554e-05	-0.596	0	0.013572	-0.5	0	0.037734	-0.914
Q6P4T2	U5 small nuclear ribonucleoprotein 200 kDa helicase OS=Mus musculus GN=Snrnp200 PE=1 SV=1	U520_MOUSE	Snrnp200 Kiaa0788	0	0	1	0	0	0	0	1	0	0	0	0	0	0	0	0	0	0	0	0	0	0	0	0	6.29554e-05	-0.596	0	0.0128422	-0.503	0	0.0385597	-0.916
Q8C0S1	Isoform 2 of DIS3-like exonuclease 1 OS=Mus musculus GN=Dis3l	DI3L1_MOUSE	Dis3l Kiaa1955	0	0	1	1	0	0	0	0	0	0	0	0	0	0	0	0	0	0	0	0	0	0	0	0	0.247901	-1.078	0	0.166667	0	#DIV/0!	0.144945	-1.03
Q8R4U6	DNA topoisomerase I, mitochondrial OS=Mus musculus GN=Top1mt PE=2 SV=1	TOP1M_MOUSE	Top1mt	0	0	1	1	0	0	0	0	0	0	0	0	0	0	0	0	0	0	0	0	0	0	0	0	0.247901	-1.078	0	0.166667	0	#DIV/0!	0.144945	-1.03
Q8VID5	ATP-dependent DNA helicase Q5 OS=Mus musculus GN=Recql5 PE=2 SV=1	RECQ5_MOUSE	Recql5	0	0	1	0	0	0	0	0	0	0	1	0	0	0	0	0	0	0	0	0	0	0	0	0	6.29554e-05	-0.596	0	4.33116e-05	-0.585	0	0.0719299	-0.978
Q9D9R9	Protein FAM186A OS=Mus musculus GN=FAM186A PE=2 SV=2	F186A_MOUSE	FAM186A Gm920	0	0	1	0	0	0	0	1	0	0	0	0	0	0	0	0	0	0	0	0	0	0	0	0	6.29554e-05	-0.596	0	0.0128422	-0.503	0	0.0385597	-0.916
Q9EQC5	N-terminal kinase-like protein OS=Mus musculus GN=Scyl1 PE=1 SV=1	NTKL_MOUSE	Scyl1	0	0	2	0	0	0	0	0	0	0	0	0	0	0	0	0	0	0	0	0	0	0	0	0	0.135023	-0.747	0	0.166667	0	#DIV/0!	0.0773295	-0.745
Q9JL26	Isoform 2 of Formin-like protein 1 OS=Mus musculus GN=Fmnl1	FMNL1_MOUSE	Fmnl1 Frl Frl1	0	0	1	0	0	0	0	0	0	0	0	1	0	0	0	0	0	0	0	0	0	0	0	0	6.29554e-05	-0.596	0	8.22406e-06	-0.587	0	0.0732912	-0.979
Q9R1L5	Microtubule-associated serine/threonine-protein kinase 1 OS=Mus musculus GN=Mast1 PE=1 SV=3	MAST1_MOUSE	Mast1 Kiaa0973 Sast	0	0	1	0	0	0	0	0	1	0	0	0	0	0	0	0	0	0	0	0	0	0	0	0	6.29554e-05	-0.596	0	0.013572	-0.5	0	0.037734	-0.914
O35206	Collagen alpha-1(XV) chain OS=Mus musculus GN=Col15a1 PE=1 SV=2	COFA1_MOUSE	Col15a1	0	0	0	1	0	1	0	0	0	0	0	0	0	0	0	0	0	0	0	0	0	0	0	0	0.31596	-1.116	0	0.166667	0	#DIV/0!	0.186588	-1.064
O54988	Isoform 2 of STE20-like serine/threonine-protein kinase OS=Mus musculus GN=Slk	SLK_MOUSE	Slk Kiaa0204 Stk2	0	0	0	1	0	0	0	1	0	0	0	0	0	0	0	0	0	0	0	0	0	0	0	0	0.0244441	-0.673	0	0.0128422	-0.503	0	0.0907648	-0.956
O89091	Krueppel-like factor 10 OS=Mus musculus GN=Klf10 PE=2 SV=1	KLF10_MOUSE	Klf10 Gdnfif Tieg Tieg1	0	0	0	1	0	0	0	0	0	0	0	1	0	0	0	0	0	0	0	0	0	0	0	0	0.0244441	-0.673	0	8.22406e-06	-0.587	0	0.139548	-1.025
P54227	Stathmin OS=Mus musculus GN=Stmn1 PE=1 SV=2	STMN1_MOUSE	Stmn1 Lag Lap18 Pr22	0	0	0	1	0	0	0	1	0	0	0	0	0	0	0	0	0	0	0	0	0	0	0	0	0.0244441	-0.673	0	0.0128422	-0.503	0	0.0907648	-0.956
Q3T9Z9	Isoform 4 of Zinc finger with UFM1-specific peptidase domain protein OS=Mus musculus GN=Zufsp	ZUFSP_MOUSE	Zufsp	0	0	0	1	0	0	0	1	0	0	0	0	0	0	0	0	0	0	0	0	0	0	0	0	0.0244441	-0.673	0	0.0128422	-0.503	0	0.0907648	-0.956
Q3TTY5	Keratin, type II cytoskeletal 2 epidermal OS=Mus musculus GN=Krt2 PE=1 SV=1	K22E_MOUSE	Krt2 K2e Krt2-17 Krt2a	0	0	0	2	0	0	0	0	0	0	0	0	0	0	0	0	0	0	0	0	0	0	0	0	0.387514	-0.805	0	0.166667	0	#DIV/0!	0.230965	-0.803
Q3U962	Collagen alpha-2(V) chain OS=Mus musculus GN=Col5a2 PE=1 SV=1	CO5A2_MOUSE	Col5a2	0	0	0	1	0	0	0	1	0	0	0	0	0	0	0	0	0	0	0	0	0	0	0	0	0.0244441	-0.673	0	0.0128422	-0.503	0	0.0907648	-0.956
Q69ZN7	Isoform 4 of Myoferlin OS=Mus musculus GN=Myof	MYOF_MOUSE	Myof Fer1l3 Kiaa1207	0	0	0	1	1	0	0	0	0	0	0	0	0	0	0	0	0	0	0	0	0	0	0	0	0.206462	-1.044	0	0.166667	0	#DIV/0!	0.119894	-1.001
Q8C863	E3 ubiquitin-protein ligase Itchy OS=Mus musculus GN=Itch PE=1 SV=2	ITCH_MOUSE	Itch	0	0	0	1	0	0	0	0	0	0	0	1	0	0	0	0	0	0	0	0	0	0	0	0	0.0244441	-0.673	0	8.22406e-06	-0.587	0	0.139548	-1.025
Q8K3G9	DCC-interacting protein 13-beta OS=Mus musculus GN=Appl2 PE=2 SV=1	DP13B_MOUSE	Appl2 Dip13b Dip3b	0	0	0	1	0	0	0	0	1	0	0	0	0	0	0	0	0	0	0	0	0	0	0	0	0.0244441	-0.673	0	0.013572	-0.5	0	0.0895313	-0.953
Q9CQI6	Coactosin-like protein OS=Mus musculus GN=Cotl1 PE=1 SV=3	COTL1_MOUSE	Cotl1 Clp	0	0	0	1	0	0	0	0	1	0	0	0	0	0	0	0	0	0	0	0	0	0	0	0	0.0244441	-0.673	0	0.013572	-0.5	0	0.0895313	-0.953
Q9CTN5	Isoform 2 of Protein SIX6OS1 OS=Mus musculus GN=Six6os1	S6OS1_MOUSE	Six6os1	0	0	0	1	1	0	0	0	0	0	0	0	0	0	0	0	0	0	0	0	0	0	0	0	0.206462	-1.044	0	0.166667	0	#DIV/0!	0.119894	-1.001
P47962	60S ribosomal protein L5 OS=Mus musculus GN=Rpl5 PE=1 SV=3	RL5_MOUSE	Rpl5	0	0	0	0	1	0	0	0	0	0	0	1	0	0	0	0	0	0	0	0	0	0	0	0	0.00196224	-0.561	0	8.22406e-06	-0.587	0	0.0553262	-0.954
P69525	Transmembrane protease serine 9 OS=Mus musculus GN=Tmprss9 PE=2 SV=1	TMPS9_MOUSE	Tmprss9	0	0	0	0	1	0	0	0	0	0	0	1	0	0	0	0	0	0	0	0	0	0	0	0	0.00196224	-0.561	0	8.22406e-06	-0.587	0	0.0553262	-0.954
Q6P9K9	Neurexin-3-beta OS=Mus musculus GN=Nrxn3 PE=1 SV=2	NRX3A_MOUSE	Nrxn3	0	0	0	0	1	0	0	0	0	1	0	0	0	0	0	0	0	0	0	0	0	0	0	0	0.00196224	-0.561	0	0.00361423	-0.547	0	0.038453	-0.927
Q80TP3	E3 ubiquitin-protein ligase UBR5 OS=Mus musculus GN=Ubr5 PE=1 SV=2	UBR5_MOUSE	Ubr5 Edd Edd1 Kiaa0896	0	0	0	0	1	0	0	1	0	0	0	0	0	0	0	0	0	0	0	0	0	0	0	0	0.00196224	-0.561	0	0.0128422	-0.503	0	0.0256403	-0.894
Q3TBD2	Isoform 3 of Minor histocompatibility protein HA-1 OS=Mus musculus GN=Hmha1	HMHA1_MOUSE	Hmha1	0	0	0	0	0	1	0	0	1	0	0	0	0	0	0	0	0	0	0	0	0	0	0	0	0.00715955	-0.64	0	0.013572	-0.5	0	0.0615687	-0.937
Q63ZW7	Isoform 2 of InaD-like protein OS=Mus musculus GN=Inadl	INADL_MOUSE	Inadl Cipp Patj	0	0	0	0	0	1	0	1	0	0	0	0	0	0	0	0	0	0	0	0	0	0	0	0	0.00715955	-0.64	0	0.0128422	-0.503	0	0.0626067	-0.498
Q6PEE2	Isoform 2 of CBP80/20-dependent translation initiation factor OS=Mus musculus GN=Ctif	CTIF_MOUSE	Ctif Gm672 Kiaa0427	0	0	0	0	0	1	0	1	0	0	0	0	0	0	0	0	0	0	0	0	0	0	0	0	0.00715955	-0.64	0	0.0128422	-0.503	0	0.0626067	-0.498
Q6RUT8	Isoform 3 of Coiled-coil domain-containing protein 154 OS=Mus musculus GN=Ccdc154	CC154_MOUSE	Ccdc154 Gm317	0	0	0	0	0	1	0	0	0	0	0	1	0	0	0	0	0	0	0	0	0	0	0	0	0.00715955	-0.64	0	8.22406e-06	-0.587	0	0.104652	-1.007
Q80YR4	Isoform 3 of Zinc finger protein 598 OS=Mus musculus GN=Znf598	ZN598_MOUSE	Znf598 Zfp598	0	0	0	0	0	1	0	1	0	0	0	0	0	0	0	0	0	0	0	0	0	0	0	0	0.00715955	-0.64	0	0.0128422	-0.503	0	0.0626067	-0.498
Q8C9W3	A disintegrin and metalloproteinase with thrombospondin motifs 2 OS=Mus musculus GN=Adamts2 PE=1 SV=2	ATS2_MOUSE	Adamts2	0	0	0	0	0	1	0	1	0	0	0	0	0	0	0	0	0	0	0	0	0	0	0	0	0.00715955	-0.64	0	0.0128422	-0.503	0	0.0626067	-0.498
P11369	LINE-1 retrotransposable element ORF2 protein OS=Mus musculus GN=Pol PE=1 SV=2	LORF2_MOUSE	Pol Gm17492	0	0	0	0	0	0	1	0	0	1	0	0	0	0	0	0	0	0	0	0	0	0	0	0	0.166667	0	#DIV/0!	0.0988944	-0.991	0	0.0561537	-0.953
Q4QRL3	Isoform 2 of Coiled-coil domain-containing protein 88B OS=Mus musculus GN=Ccdc88b	CC88B_MOUSE	Ccdc88b Ccdc88	0	0	0	0	0	0	1	1	0	0	0	0	0	0	0	0	0	0	0	0	0	0	0	0	0.166667	0	#DIV/0!	0.0719787	-0.953	0	0.0405623	-0.919
Q61245	Isoform Short of Collagen alpha-1(XI) chain OS=Mus musculus GN=Col11a1	COBA1_MOUSE	Col11a1	0	0	0	0	0	0	1	0	1	0	0	0	0	0	0	0	0	0	0	0	0	0	0	0	0.166667	0	#DIV/0!	0.0705097	-0.95	0	0.0397165	-0.916
Q69ZK6	Probable JmjC domain-containing histone demethylation protein 2C OS=Mus musculus GN=Jmjd1c PE=1 SV=3	JHD2C_MOUSE	Jmjd1c Jhdm2c Kiaa1380	0	0	0	0	0	0	1	1	0	0	0	0	0	0	0	0	0	0	0	0	0	0	0	0	0.166667	0	#DIV/0!	0.0719787	-0.953	0	0.0405623	-0.919
Q6NY15	Isoform 2 of Testis-specific gene 10 protein OS=Mus musculus GN=Tsga10	TSG10_MOUSE	Tsga10	0	0	0	0	0	0	1	1	0	0	0	0	0	0	0	0	0	0	0	0	0	0	0	0	0.166667	0	#DIV/0!	0.0719787	-0.953	0	0.0405623	-0.919
Q6PD24	Ankyrin repeat domain-containing protein 13D OS=Mus musculus GN=Ankrd13d PE=2 SV=2	AN13D_MOUSE	Ankrd13d	0	0	0	0	0	0	1	0	0	1	0	0	0	0	0	0	0	0	0	0	0	0	0	0	0.166667	0	#DIV/0!	0.0988944	-0.991	0	0.0561537	-0.953
Q9DBT9	Dimethylglycine dehydrogenase, mitochondrial OS=Mus musculus GN=Dmgdh PE=1 SV=1	M2GD_MOUSE	Dmgdh	0	0	0	0	0	0	1	0	0	0	1	0	0	0	0	0	0	0	0	0	0	0	0	0	0.166667	0	#DIV/0!	0.130395	-1.022	0	0.0746025	-0.493
O54781	SRSF protein kinase 3 OS=Mus musculus GN=Srpk3 PE=2 SV=1	SRPK2_MOUSE	Srpk2	0	0	0	0	0	0	0	1	0	0	0	1	0	0	0	0	0	0	0	0	0	0	0	0	0.166667	0	#DIV/0!	0.0634531	-0.946	0	0.0356613	-0.912
P45448	Nuclear receptor subfamily 5 group A member 2 OS=Mus musculus GN=Nr5a2 PE=1 SV=3	NR5A2_MOUSE	Nr5a2 Lrh1	0	0	0	0	0	0	0	1	0	1	0	0	0	0	0	0	0	0	0	0	0	0	0	0	0.166667	0	#DIV/0!	0.0399631	-0.92	0	0.0222663	-0.886
P48972	Myb-related protein B OS=Mus musculus GN=Mybl2 PE=1 SV=1	MYBB_MOUSE	Mybl2 Bmyb	0	0	0	0	0	0	0	1	0	0	1	0	0	0	0	0	0	0	0	0	0	0	0	0	0.166667	0	#DIV/0!	0.0617636	-0.945	0	0.0346924	-0.91
Q6ZPL9	ATP-dependent RNA helicase DDX55 OS=Mus musculus GN=Ddx55 PE=1 SV=2	DDX55_MOUSE	Ddx55 Kiaa1595	0	0	0	0	0	0	0	1	1	0	0	0	0	0	0	0	0	0	0	0	0	0	0	0	0.166667	0	#DIV/0!	0.0221517	-0.885	0	0.0122367	-0.312
Q6ZQ73	Cullin-associated NEDD8-dissociated protein 2 OS=Mus musculus GN=Cand2 PE=1 SV=2	CAND2_MOUSE	Cand2 Kiaa0667 Tip120b	0	0	0	0	0	0	0	1	1	0	0	0	0	0	0	0	0	0	0	0	0	0	0	0	0.166667	0	#DIV/0!	0.0221517	-0.885	0	0.0122367	-0.312
Q8VHR0	Protocadherin 18 OS=Mus musculus GN=Pcdh18 PE=1 SV=2	PCD18_MOUSE	Pcdh18 Kiaa1562	0	0	0	0	0	0	0	1	1	0	0	0	0	0	0	0	0	0	0	0	0	0	0	0	0.166667	0	#DIV/0!	0.0221517	-0.885	0	0.0122367	-0.312
Q9EPL2	Isoform 2 of Calsyntenin-1 OS=Mus musculus GN=Clstn1	CSTN1_MOUSE	Clstn1 Cs1 Cstn1 Kiaa0911	0	0	0	0	0	0	0	1	0	0	1	0	0	0	0	0	0	0	0	0	0	0	0	0	0.166667	0	#DIV/0!	0.0617636	-0.945	0	0.0346924	-0.91
Q9ES52	Isoform 6 of Phosphatidylinositol 3,4,5-trisphosphate 5-phosphatase 1 OS=Mus musculus GN=Inpp5d	SHIP1_MOUSE	Inpp5d 7a33 Ship Ship1	0	0	0	0	0	0	0	2	0	0	0	0	0	0	0	0	0	0	0	0	0	0	0	0	0.166667	0	#DIV/0!	0.0230152	-0.669	0	0.0127199	-0.669
Q9QZR0	E3 ubiquitin-protein ligase RNF25 OS=Mus musculus GN=Rnf25 PE=1 SV=2	RNF25_MOUSE	Rnf25	0	0	0	0	0	0	0	1	1	0	0	0	0	0	0	0	0	0	0	0	0	0	0	0	0.166667	0	#DIV/0!	0.0221517	-0.885	0	0.0122367	-0.312
Q3UHB8	Coiled-coil domain-containing protein 177 OS=Mus musculus GN=Ccdc177 PE=1 SV=1	CC177_MOUSE	Ccdc177 Gm1568	0	0	0	0	0	0	0	0	1	1	0	0	0	0	0	0	0	0	0	0	0	0	0	0	0.166667	0	#DIV/0!	0.0388427	-0.918	0	0.0216319	-0.884
Q4VA53	Isoform 3 of Sister chromatid cohesion protein PDS5 homolog B OS=Mus musculus GN=Pds5b	PDS5B_MOUSE	Pds5b Aprin As3 Kiaa0979	0	0	0	0	0	0	0	0	2	0	0	0	0	0	0	0	0	0	0	0	0	0	0	0	0.166667	0	#DIV/0!	0.0213038	-0.667	0	0.0117626	-0.667
Q6PH08	Isoform 3 of ELKS/Rab6-interacting/CAST family member 1 OS=Mus musculus GN=Erc1	ERC2_MOUSE	Erc2 Cast1 D14Ertd171e Kiaa0378	0	0	0	0	0	0	0	0	1	1	0	0	0	0	0	0	0	0	0	0	0	0	0	0	0.166667	0	#DIV/0!	0.0388427	-0.918	0	0.0216319	-0.884
Q8BK06	Isoform 2 of F-box only protein 9 OS=Mus musculus GN=Fbxo9	FBX9_MOUSE	Fbxo9 MNCb-2471	0	0	0	0	0	0	0	0	1	1	0	0	0	0	0	0	0	0	0	0	0	0	0	0	0.166667	0	#DIV/0!	0.0388427	-0.918	0	0.0216319	-0.884
Q8BR07	Isoform 4 of Protein bicaudal D homolog 1 OS=Mus musculus GN=Bicd1	BICD1_MOUSE	Bicd1	0	0	0	0	0	0	0	0	1	0	0	1	0	0	0	0	0	0	0	0	0	0	0	0	0.166667	0	#DIV/0!	0.062066	-0.944	0	0.0348658	-0.91
Q8CDU6	Probable E3 ubiquitin-protein ligase HECTD2 OS=Mus musculus GN=Hectd2 PE=2 SV=2	HECD2_MOUSE	Hectd2	0	0	0	0	0	0	0	0	1	0	1	0	0	0	0	0	0	0	0	0	0	0	0	0	0.166667	0	#DIV/0!	0.0603935	-0.942	0	0.0339073	0
Q01853	Transitional endoplasmic reticulum ATPase OS=Mus musculus GN=Vcp PE=1 SV=4	TERA_MOUSE	Vcp	0	0	0	0	0	0	0	0	0	2	0	0	0	0	0	0	0	0	0	0	0	0	0	0	0.166667	0	#DIV/0!	0.0611385	-0.707	0	0.0343341	-0.707
Q6P4S6	Isoform 2 of Serine/threonine-protein kinase SIK3 OS=Mus musculus GN=Sik3	SIK3_MOUSE	Sik3 Kiaa0999 Qsk	0	0	0	0	0	0	0	0	0	1	0	1	0	0	0	0	0	0	0	0	0	0	0	0	0.166667	0	#DIV/0!	0.0890198	-0.984	0	0.0504139	-0.946
Q80US8	Max dimerization protein 3 OS=Mus musculus GN=Mxd3 PE=1 SV=1	MAD3_MOUSE	Mxd3 Mad3	0	0	0	0	0	0	0	0	0	2	0	0	0	0	0	0	0	0	0	0	0	0	0	0	0.166667	0	#DIV/0!	0.0611385	-0.707	0	0.0343341	-0.707
Q8R322	Nucleoporin GLE1 OS=Mus musculus GN=Gle1 PE=1 SV=2	GLE1_MOUSE	Gle1 Gle1l	0	0	0	0	0	0	0	0	0	1	1	0	0	0	0	0	0	0	0	0	0	0	0	0	0.166667	0	#DIV/0!	0.0870503	-0.982	0	0.0492718	-0.944
Q921B4	Neurotrophin receptor-interacting factor 2 OS=Mus musculus GN=Nrif2 PE=1 SV=1	NRIF2_MOUSE	Nrif2 Zfp369	0	0	0	0	0	0	0	0	0	1	0	1	0	0	0	0	0	0	0	0	0	0	0	0	0.166667	0	#DIV/0!	0.0890198	-0.984	0	0.0504139	-0.946
Q9D1C8	Vacuolar protein sorting-associated protein 28 homolog OS=Mus musculus GN=Vps28 PE=2 SV=1	VPS28_MOUSE	Vps28	0	0	0	0	0	0	0	0	0	1	0	1	0	0	0	0	0	0	0	0	0	0	0	0	0.166667	0	#DIV/0!	0.0890198	-0.984	0	0.0504139	-0.946
P60521	Gamma-aminobutyric acid receptor-associated protein-like 2 OS=Mus musculus GN=Gabarapl2 PE=1 SV=1	GBRL2_MOUSE	Gabarapl2	0	0	0	0	0	0	0	0	0	0	1	1	0	0	0	0	0	0	0	0	0	0	0	0	0.166667	0	#DIV/0!	0.119207	-1.014	0	0.0680268	-0.973
Q0VAV2	Exophilin-5 OS=Mus musculus GN=Exph5 PE=1 SV=1	EXPH5_MOUSE	Exph5 Kiaa0624 Slac2b	0	0	0	0	0	0	0	0	0	0	1	1	0	0	0	0	0	0	0	0	0	0	0	0	0.166667	0	#DIV/0!	0.119207	-1.014	0	0.0680268	-0.973
P68372	Tubulin beta-4A chain OS=Mus musculus GN=Tubb4a PE=1 SV=3	TBB4B_MOUSE	Tubb4b Tubb2c	2	1	1	4	0	2	0	0	0	1	0	1	5	4	2	2	2	0	0	0	0	1	0	0	0.486695	0.659	1.5	0.000215243	-0.443	0.5	0.237214	0.424
Q9QXC1	Fetuin-B OS=Mus musculus GN=Fetub PE=1 SV=1	FETUB_MOUSE	Fetub	74	146	128	74	135	81	232	305	274	300	261	230	121	153	106	67	140	120	174	284	255	280	237	244	8.38316	1.165	1.10815	0.853717	-0.707	0.9201	0.985974	0
Q8BH27	Multiple epidermal growth factor-like domains protein 9 OS=Mus musculus GN=Megf9 PE=2 SV=1	MEGF9_MOUSE	Megf9 Egfl5 Kiaa0818	1	2	1	0	0	0	0	0	0	0	0	0	2	0	2	1	0	2	0	0	0	0	0	0	0.492314	0.935	1.75	0.166667	0	#DIV/0!	0.375544	0.772
Q9Z222	UDP-GlcNAc:betaGal beta-1,3-N-acetylglucosaminyltransferase 2 OS=Mus musculus GN=B3gnt2 PE=1 SV=3	B3GN2_MOUSE	B3GNT2 B3gnt1 Beta3gnt	3	0	0	0	1	0	0	0	0	0	0	0	1	0	2	1	2	1	0	0	0	0	0	0	0.232415	0.601	1.75	0.166667	0	#DIV/0!	0.176716	0.532
Q571C7	Isoform 2 of Transcription factor TFIIIB component B'' homolog OS=Mus musculus GN=Bdp1	BDP1_MOUSE	Bdp1 Kiaa1241 Tfnr	0	0	0	0	1	1	1	0	1	0	0	0	0	0	0	1	1	2	1	1	0	0	0	1	0.196027	0.751	2	0.00468491	0.493	1.5	0.335496	0.984
Q8K1I3	Secreted phosphoprotein 24 OS=Mus musculus GN=Spp2 PE=1 SV=2	SPP24_MOUSE	Spp2 Spp24	9	11	5	4	4	4	11	18	14	12	15	9	13	7	1	2	4	3	10	16	9	10	13	12	0.571439	-0.47	0.810811	0.0446598	-0.42	0.886076	0.490739	-0.541
Q60963	Platelet-activating factor acetylhydrolase OS=Mus musculus GN=Pla2g7 PE=2 SV=2	PAFA_MOUSE	Pla2g7 Pafah	32	29	22	16	32	19	37	31	35	36	41	37	26	36	18	15	35	22	28	31	29	36	50	43	0.0501184	0	1.01333	0.131075	0.278	1	0.205434	0.327
P11152	Lipoprotein lipase OS=Mus musculus GN=Lpl PE=1 SV=3	LIPL_MOUSE	Lpl	1	1	2	0	1	1	0	0	1	1	1	1	0	1	0	0	1	0	0	1	1	1	1	0	0.817309	-1.575	0.333333	0.0594467	-0.055	1	0.467939	-1.34
P55288	Cadherin-11 OS=Mus musculus GN=Cdh11 PE=1 SV=1	CAD11_MOUSE	Cdh11 Cad-11	1	0	0	0	1	0	2	2	2	0	1	1	1	1	0	0	0	0	0	1	1	0	0	2	0.0551033	0	1	0.36525	-1.087	0.5	0.180477	-0.778
P16015	Carbonic anhydrase 3 OS=Mus musculus GN=Ca3 PE=1 SV=3	CAH3_MOUSE	Ca3 Car3	11	6	7	7	7	7	3	2	2	1	1	2	9	4	10	2	8	5	2	0	4	0	2	0	0.693177	-0.755	0.844444	0.0583286	-0.452	0.727273	0.892076	-0.538
Q6QD59	Vesicle transport protein SEC20 OS=Mus musculus GN=Bnip1 PE=2 SV=1	SEC20_MOUSE	Bnip1 Sec20 Sec20l	0	2	1	1	0	0	1	2	4	2	2	1	0	1	2	1	0	0	1	1	1	1	1	2	0.0132084	0	1	0.257142	-1.292	0.583333	0.090121	-0.598
Q61830	Macrophage mannose receptor 1 OS=Mus musculus GN=Mrc1 PE=1 SV=2	MRC1_MOUSE	Mrc1	19	8	7	4	3	8	4	3	0	0	0	1	17	2	5	7	5	4	3	1	2	1	0	0	0.969154	-0.437	0.816327	0.0286782	-0.039	0.875	0.860699	-0.358
P10810	Monocyte differentiation antigen CD14 OS=Mus musculus GN=Cd14 PE=1 SV=1	CD14_MOUSE	Cd14	3	1	2	2	3	2	4	2	3	1	0	0	5	0	1	1	2	0	3	2	2	1	0	0	0.43788	-0.712	0.692308	0.00425365	-0.118	0.8	0.361063	-0.637
Q9D154	Leukocyte elastase inhibitor A OS=Mus musculus GN=Serpinb1a PE=1 SV=1	ILEUA_MOUSE	Serpinb1a Serpinb1	4	4	3	5	5	2	0	0	0	0	0	0	4	1	2	3	5	2	0	0	0	0	0	0	0.74414	-1.188	0.73913	0.166667	0	#DIV/0!	0.668029	-0.604
Q8QZR3	Pyrethroid hydrolase Ces2a OS=Mus musculus GN=Ces2a PE=1 SV=1	EST2A_MOUSE	Ces2a Ces6	9	0	7	13	17	10	6	10	10	5	6	6	9	8	10	17	16	9	0	0	4	3	5	4	1.81934	0.812	1.23214	7.94398	-3.642	0.372093	0.0561323	-0.142
P97372	Proteasome activator complex subunit 2 OS=Mus musculus GN=Psme2 PE=2 SV=4	PSME2_MOUSE	Psme2 Pa28b1	1	3	1	0	0	0	0	0	0	0	0	0	2	3	2	0	0	0	0	1	0	0	0	0	0.190746	0.505	1.4	0.0068583	0.529	#DIV/0!	0.279588	0.578
Q9EQG7	Ectonucleotide pyrophosphatase/phosphodiesterase family member 5 OS=Mus musculus GN=Enpp5 PE=2 SV=3	ENPP5_MOUSE	Enpp5	1	1	1	2	0	0	0	0	0	0	0	0	1	1	3	0	2	1	0	0	0	0	0	0	0.14397	0.595	1.6	0.166667	0	#DIV/0!	0.112502	0.481
Q8CBR6	Tsukushin OS=Mus musculus GN=Tsku PE=2 SV=2	TSK_MOUSE	Tsku Lrrc54 Tsk	0	1	0	1	2	1	0	0	0	0	0	0	0	1	0	2	3	0	0	1	0	0	0	1	0.00553807	0	1.2	0.0645151	0.957	#DIV/0!	0.15703	0.59
Q0VDT2	Isoform 2 of Zinc finger protein 367 OS=Mus musculus GN=Znf367	ZN367_MOUSE	Znf367 Zff29 Zfp367	0	0	0	0	0	0	0	1	2	0	1	1	0	0	0	0	0	2	0	2	1	1	0	2	0.21678	0.772	#DIV/0!	7.02423e-06	0.332	1.2	0.235942	0.801
Q8CIF4	Biotinidase OS=Mus musculus GN=Btd PE=1 SV=2	BTD_MOUSE	Btd	15	15	14	12	12	10	12	13	8	5	6	6	12	10	15	9	18	12	9	15	13	7	7	6	0.0137369	-0.24	0.974359	0.53427	0.764	1.14	0.0784375	0
Q61982	Neurogenic locus notch homolog protein 3 OS=Mus musculus GN=Notch3 PE=1 SV=1	NOTC3_MOUSE	Notch3	4	1	1	1	2	2	1	1	2	1	1	0	2	0	2	0	0	1	1	1	2	0	1	2	1.51241	-1.255	0.454545	0.011345	0.54	1.16667	0.526321	-0.893
Q9DAU1	Isoform 2 of Protein canopy homolog 3 OS=Mus musculus GN=Cnpy3	CNPY3_MOUSE	Cnpy3 Prat4a Tnrc5	2	6	5	3	1	0	0	0	0	0	0	0	1	3	1	4	2	1	0	0	0	0	0	0	0.315755	-0.536	0.705882	0.166667	0	#DIV/0!	0.275224	-0.406
P16406	Glutamyl aminopeptidase OS=Mus musculus GN=Enpep PE=1 SV=1	AMPE_MOUSE	Enpep	3	2	0	3	4	0	0	2	3	1	1	0	2	2	0	0	5	1	2	3	3	1	3	1	0.222282	-0.512	0.833333	1.31483	1.823	1.85714	0.0679474	0.37
P40124	Adenylyl cyclase-associated protein 1 OS=Mus musculus GN=Cap1 PE=1 SV=4	CAP1_MOUSE	Cap1 Cap	4	1	1	1	3	1	0	0	0	0	0	0	2	1	1	2	1	0	0	0	0	0	0	0	0.358459	-0.734	0.636364	0.166667	0	#DIV/0!	0.294482	-0.563
P61161	Actin-related protein 2 OS=Mus musculus GN=Actr2 PE=1 SV=1	ARP2_MOUSE	Actr2 Arp2	1	2	4	1	1	0	0	0	2	0	0	0	1	1	1	1	1	0	0	1	1	0	0	0	0.386811	-0.903	0.555556	0.0734812	0.078	1	0.240639	-0.675
O35490	Betaine--homocysteine S-methyltransferase 1 OS=Mus musculus GN=Bhmt PE=1 SV=1	BHMT1_MOUSE	Bhmt	0	1	1	2	0	2	0	0	0	0	0	0	2	2	1	1	1	2	0	0	0	0	0	0	0.244896	0.838	1.5	0.166667	0	#DIV/0!	0.196437	0.59
P17563	Selenium-binding protein 1 OS=Mus musculus GN=Selenbp1 PE=1 SV=2	SBP1_MOUSE	Selenbp1 Lpsb	0	0	2	2	0	0	0	1	0	0	0	1	4	1	0	0	0	0	1	1	1	0	0	1	0.00208228	0	1.25	0.0987584	0.871	2	0.178326	0.503
Q8BQM9	Isoform 2 of Mediator of RNA polymerase II transcription subunit 12-like protein OS=Mus musculus GN=Med12l	MD12L_MOUSE	Med12l Kiaa3007	0	0	1	0	0	0	0	2	1	2	0	0	0	0	0	0	1	0	1	1	0	1	2	3	0.0928587	0	1	0.434263	1.012	1.6	0.267941	0.797
Q60648	Ganglioside GM2 activator OS=Mus musculus GN=Gm2a PE=1 SV=2	SAP3_MOUSE	Gm2a	0	0	0	0	0	0	1	1	1	0	2	1	0	0	0	0	0	0	0	2	3	1	1	2	0.166667	0	#DIV/0!	0.0777066	0.672	1.5	0.059073	0.498
P04117	Fatty acid-binding protein, adipocyte OS=Mus musculus GN=Fabp4 PE=1 SV=3	FABP4_MOUSE	Fabp4 Ap2	19	12	10	14	19	9	7	3	5	3	5	10	23	12	7	6	17	9	9	7	7	0	4	0	0.565848	-0.483	0.891566	0.157246	-0.307	0.818182	0.833295	-0.413
P29391	Ferritin light chain 2 OS=Mus musculus GN=Ftl2 PE=2 SV=2	FRIL1_MOUSE	Ftl1 Ftl Ftl-1	3	0	0	0	0	0	1	1	1	0	0	0	0	0	1	0	0	0	0	1	1	0	0	0	0.302134	-0.575	0.333333	0.00193663	-0.389	0.666667	0.343971	-0.736
P50543	Protein S100-A11 OS=Mus musculus GN=S100a11 PE=1 SV=1	S10AB_MOUSE	S100a11 S100c	1	1	1	0	1	1	0	0	0	0	0	1	1	0	1	0	0	0	0	0	0	0	1	0	0.33543	-1.201	0.4	0.110781	-0.031	1	0.227122	-0.953
P62774	Myotrophin OS=Mus musculus GN=Mtpn PE=1 SV=2	MTPN_MOUSE	Mtpn Gcdp	1	2	1	1	1	0	0	0	0	0	0	0	2	0	1	0	0	0	0	0	0	0	0	0	0.313858	-0.875	0.5	0.166667	0	#DIV/0!	0.230365	-0.738
P54761	Ephrin type-B receptor 4 OS=Mus musculus GN=Ephb4 PE=1 SV=2	EPHB4_MOUSE	Ephb4 Htk Mdk2 Myk1	0	1	1	0	2	1	0	0	0	0	0	1	2	0	0	0	0	0	0	0	0	0	1	0	0.219789	-0.744	0.4	0.110781	-0.031	1	0.148986	-0.683
Q61581	Insulin-like growth factor-binding protein 7 OS=Mus musculus GN=Igfbp7 PE=2 SV=3	IBP7_MOUSE	Igfbp7 Mac25	2	1	3	3	2	2	2	3	3	2	1	1	2	2	2	2	0	0	3	3	2	2	1	0	0.51192	-1.017	0.615385	0.0112118	0.111	0.916667	0.219998	-0.744
Q9EP95	Resistin-like alpha OS=Mus musculus GN=Retnla PE=1 SV=1	RETNA_MOUSE	Retnla Fizz1 Himf Pmng1	5	3	1	3	3	3	0	0	0	0	0	0	3	3	1	2	2	2	0	0	0	0	0	0	0.590486	-1.009	0.722222	0.166667	0	#DIV/0!	0.518888	-0.592
Q9JHI0	Matrix metalloproteinase-19 OS=Mus musculus GN=Mmp19 PE=2 SV=1	MMP19_MOUSE	Mmp19 Rasi	3	3	4	1	4	3	0	0	0	0	0	0	2	2	3	2	2	1	0	0	0	1	0	0	0.525138	-1.423	0.666667	0.00214747	0.557	#DIV/0!	0.294651	-0.545
P05213	Tubulin alpha-1C chain OS=Mus musculus GN=Tuba1c PE=1 SV=1	TBA1B_MOUSE	Tuba1b Tuba2	6	2	4	0	3	6	0	1	1	2	0	1	4	0	4	2	5	3	0	1	1	0	0	0	0.164318	-0.404	0.857143	0.192413	-0.978	0.4	0.463926	-0.499
P49182	Heparin cofactor 2 OS=Mus musculus GN=Serpind1 PE=1 SV=1	HEP2_MOUSE	Serpind1 Hcf2 Hcii	42	34	41	34	49	41	47	58	62	41	39	41	35	34	35	36	47	35	39	59	54	58	46	44	0.361742	-0.72	0.921162	1.18969	1.618	1.04167	0.0914649	0.405
P55284	Cadherin-5 OS=Mus musculus GN=Cdh5 PE=1 SV=2	CADH5_MOUSE	Cdh5	18	20	22	4	14	11	10	12	11	2	5	6	32	14	11	6	12	11	21	10	16	3	3	0	0.000572549	0	0.966292	1.5659	0.518	1.15217	0.613044	0.316
Q923X1	EGF, latrophilin seven transmembrane domain-containing protein 1 OS=Mus musculus GN=Eltd1 PE=2 SV=3	AGRL4_MOUSE	Adgrl4 Eltd1	1	2	0	3	3	2	1	0	0	0	0	0	0	0	1	2	1	2	0	1	1	0	0	0	0.791249	-1.057	0.545455	0.0240689	0.254	2	0.462613	-0.741
P26040	Ezrin OS=Mus musculus GN=Ezr PE=1 SV=3	EZRI_MOUSE	Ezr Vil2	3	0	0	2	0	3	0	0	0	0	0	0	6	0	0	0	0	1	0	3	0	0	0	1	0.0607431	-0.241	0.875	0.557432	1.074	#DIV/0!	4.97267e-05	0
Q8BK48	Pyrethroid hydrolase Ces2e OS=Mus musculus GN=Ces2e PE=1 SV=1	EST2E_MOUSE	Ces2e Ces5	14	23	11	22	29	23	8	12	10	6	10	9	14	11	12	24	34	19	11	8	5	8	6	6	0.174634	-0.28	0.934426	0.198616	-0.528	0.8	0.406128	-0.273
P52480-2	Isoform M1 of Pyruvate kinase PKM OS=Mus musculus GN=Pkm	KPYM_MOUSE	Pkm Pk3 Pkm2 Pykm	35	40	40	23	35	24	29	29	33	29	20	24	33	30	26	32	40	18	25	29	32	35	28	30	0.315873	-0.442	0.908629	1.4914	1.751	1.09146	0.0999918	0
P24452	Macrophage-capping protein OS=Mus musculus GN=Capg PE=1 SV=2	CAPG_MOUSE	Capg Mbh1	1	0	0	0	0	0	0	0	0	0	0	0	1	0	0	1	0	0	1	0	0	0	0	0	0.00985303	0.458	2	0.00913921	0.643	#DIV/0!	0.142896	0.811
Q62178	Semaphorin-4A OS=Mus musculus GN=Sema4a PE=1 SV=2	SEM4A_MOUSE	Sema4a Semab SemB	1	0	0	0	0	0	0	0	0	0	0	0	0	0	2	0	1	0	0	0	0	0	0	0	0.0903791	0.568	3	0.166667	0	#DIV/0!	0.057918	0.554
Q80UM3	N-alpha-acetyltransferase 15, NatA auxiliary subunit OS=Mus musculus GN=Naa15 PE=1 SV=1	NAA15_MOUSE	Naa15 Narg1 Nat1 Tbdn-1 Tubedown	1	0	0	0	0	0	0	0	0	0	0	0	1	0	0	0	0	0	1	0	0	0	1	0	0.0826344	0	1	0.17203	1.039	#DIV/0!	0.0630841	0.688
Q9R1V7	Isoform Delta of Disintegrin and metalloproteinase domain-containing protein 23 OS=Mus musculus GN=Adam23	ADA23_MOUSE	Adam23 Mdc3	1	0	0	0	0	0	0	0	0	0	0	0	0	0	1	0	1	1	0	0	0	0	0	0	0.0799677	0.708	3	0.166667	0	#DIV/0!	0.0511407	0.662
Q3TMX7	Isoform 2 of Sulfhydryl oxidase 2 OS=Mus musculus GN=Qsox2	QSOX2_MOUSE	Qsox2 Qscn6l1	0	1	0	0	0	0	0	0	0	0	0	0	0	3	0	0	0	0	0	0	0	0	0	0	0.267202	0.58	3	0.166667	0	#DIV/0!	0.172531	0.579
Q99KU6	Isoform 2 of Bombesin receptor-activated protein C6orf89 homolog OS=Mus musculus	CF089_MOUSE	0	0	1	0	0	0	0	0	0	0	0	0	0	0	1	0	0	0	2	0	0	0	0	0	0	0.211432	0.744	3	0.166667	0	#DIV/0!	0.135612	0.717
P49429	4-hydroxyphenylpyruvate dioxygenase OS=Mus musculus GN=Hpd PE=1 SV=3	HPPD_MOUSE	Hpd	0	0	1	0	0	0	0	0	0	0	0	0	0	2	0	0	0	1	0	0	0	0	0	0	0.268881	0.778	3	0.166667	0	#DIV/0!	0.172516	0.752
Q61066	Nuclear receptor subfamily 0 group B member 1 OS=Mus musculus GN=Nr0b1 PE=1 SV=1	NR0B1_MOUSE	Nr0b1 Ahch Dax1	0	0	1	0	0	0	0	0	0	0	0	0	0	2	0	0	1	0	0	0	0	0	0	0	0.188805	0.704	3	0.166667	0	#DIV/0!	0.119925	0.685
P29416	Beta-hexosaminidase subunit alpha OS=Mus musculus GN=Hexa PE=2 SV=2	HEXA_MOUSE	Hexa	0	0	0	1	0	0	0	0	0	0	0	0	1	1	1	0	0	0	0	0	0	0	0	0	0.147941	0.793	3	0.166667	0	#DIV/0!	0.0961395	0.736
P55264	Isoform Short of Adenosine kinase OS=Mus musculus GN=Adk	ADK_MOUSE	Adk	0	0	0	1	0	0	0	0	0	0	0	0	2	0	0	0	0	0	1	0	0	0	0	0	4.90842e-05	0	2	0.00913921	0.643	#DIV/0!	0.0893421	0.609
Q80XI1	Isoform 2 of F-box only protein 34 OS=Mus musculus GN=Fbxo34	FBX34_MOUSE	Fbxo34	0	0	0	1	0	0	0	0	0	0	0	0	1	0	0	0	0	0	0	0	1	0	0	1	0.0697905	0	1	0.0673349	0.961	#DIV/0!	0.01511	-0.087
P18524	Ig heavy chain V region 345 OS=Mus musculus PE=1 SV=1	HVM53_MOUSE	0	0	0	0	0	0	1	0	0	0	0	0	0	0	0	0	0	0	0	0	0	0	0	3	0	0.00715955	-0.64	0	0.363641	0.8	#DIV/0!	0.0195906	-0.637
A2ARZ3	Fibrous sheath-interacting protein 2 OS=Mus musculus GN=Fsip2 PE=4 SV=3	FSIP2_MOUSE	Fsip2	0	0	0	0	0	0	1	0	0	0	0	0	0	0	0	0	0	0	1	1	1	0	0	0	0.166667	0	#DIV/0!	0.0650739	0.753	3	0.0404904	0.706
Q0VFX2	Uncharacterized protein C9orf117 homolog OS=Mus musculus PE=2 SV=1	CI117_MOUSE	0	0	0	0	0	0	0	1	0	0	0	0	0	0	0	0	1	1	0	0	1	0	0	0	0	0.218476	1.046	#DIV/0!	0.0707622	-0.128	1	0.0741016	0.771
Q3UQ28	Peroxidasin homolog OS=Mus musculus GN=Pxdn PE=2 SV=2	PXDN_MOUSE	Pxdn Kiaa0230	0	0	0	0	0	0	1	0	0	0	0	0	1	0	0	0	0	0	1	1	0	0	0	0	0.00566811	0.635	#DIV/0!	2.95598e-07	0.418	2	0.0889736	0.809
Q7TSA6	Uncharacterized protein C19orf55 homolog OS=Mus musculus PE=2 SV=1	PRSR3_MOUSE	Proser3	0	0	0	0	0	0	1	0	0	0	0	0	1	0	0	0	0	0	1	0	0	0	1	0	0.00566811	0.635	#DIV/0!	0.00232749	0.468	2	0.1107	0.849
O55126	Protein NipSnap homolog 2 OS=Mus musculus GN=Gbas PE=2 SV=1	NIPS2_MOUSE	Gbas Nipsnap2	0	0	0	0	0	0	0	1	0	0	0	0	0	0	1	0	0	0	0	1	1	0	0	0	0.00753942	0.641	#DIV/0!	0.00179362	0.456	2	0.0795908	0.89
Q6ZWQ0	Nesprin-2 OS=Mus musculus GN=Syne2 PE=1 SV=2	SYNE2_MOUSE	Syne2	0	0	0	0	0	0	0	0	1	0	0	0	0	1	0	0	1	1	0	0	0	0	0	0	0.579225	1.503	#DIV/0!	0.013572	-0.5	0	0.164899	1.012
Q9D4J3	Isoform 2 of Discoidin, CUB and LCCL domain-containing protein 1 OS=Mus musculus GN=Dcbld1	DCBD1_MOUSE	Dcbld1	0	0	0	0	0	0	0	0	1	0	0	0	0	0	0	1	0	1	0	0	0	1	0	0	0.313284	1.111	#DIV/0!	0.0887475	0.099	1	0.205477	1.041
Q80YV3	Transformation/transcription domain-associated protein OS=Mus musculus GN=Trrap PE=1 SV=2	TRRAP_MOUSE	Trrap	0	0	0	0	0	0	0	0	0	0	0	1	0	0	1	0	0	1	1	0	0	0	0	0	0.235179	1.087	#DIV/0!	0.0654597	0.115	1	0.167673	0.936
Q7TT50	Serine/threonine-protein kinase MRCK beta OS=Mus musculus GN=Cdc42bpb PE=1 SV=2	MRCKB_MOUSE	Cdc42bpb Kiaa1124	0	2	2	2	1	0	0	1	1	0	0	0	2	2	1	0	4	1	0	1	1	0	0	0	0.139787	0.578	1.42857	0.0748763	0.088	1	0.123404	0.493
P41317	Mannose-binding protein C OS=Mus musculus GN=Mbl2 PE=2 SV=2	MBL2_MOUSE	Mbl2	43	58	63	36	35	27	83	125	120	82	66	58	47	46	47	36	44	35	71	106	108	67	71	60	0.0063161	0	0.973282	0.113095	-0.226	0.904494	0.0333037	-0.093
P51437	Cathelin-related antimicrobial peptide OS=Mus musculus GN=Camp PE=2 SV=1	CRAMP_MOUSE	Camp Cnlp Cramp	3	3	2	2	2	3	7	3	4	3	5	5	3	2	2	3	2	3	2	6	1	8	7	7	0.0048411	0	1	0.0983208	0.398	1.14815	0.086379	0.413
O09049	Regenerating islet-derived protein 3-gamma OS=Mus musculus GN=Reg3g PE=1 SV=1	REG3G_MOUSE	Reg3g Pap3	4	2	1	4	4	3	0	2	0	0	0	0	2	0	3	2	3	3	0	1	1	0	0	0	0.683763	-1.033	0.722222	0.0762832	0.071	1	0.52976	-0.631
P47877	Insulin-like growth factor-binding protein 2 OS=Mus musculus GN=Igfbp2 PE=2 SV=2	IBP2_MOUSE	Igfbp2 Igfbp-2	6	9	4	3	9	9	13	9	3	2	5	8	5	7	8	5	9	4	6	9	5	2	6	3	0.000445074	0	0.95	0.652157	-0.609	0.775	0.345538	-0.543
Q6ZQ06	Centrosomal protein of 162 kDa OS=Mus musculus GN=Cep162 PE=1 SV=2	CE162_MOUSE	Cep162 Kiaa1009 Qn1	3	5	6	5	5	1	3	3	7	8	3	3	3	5	5	2	7	6	2	7	7	5	4	3	0.110619	0.517	1.12	0.00872986	0.281	1.03704	0.161257	0.587
P01783	Ig heavy chain V region MOPC 21 (Fragment) OS=Mus musculus PE=1 SV=1	HVM16_MOUSE	0	1	0	1	2	4	2	0	0	0	0	0	0	3	0	3	2	3	2	0	0	0	0	0	0	0.278519	0.756	1.3	0.166667	0	#DIV/0!	0.235062	0.507
Q60992	Guanine nucleotide exchange factor VAV2 OS=Mus musculus GN=Vav2 PE=1 SV=1	VAV2_MOUSE	Vav2	0	1	0	2	0	4	0	0	0	0	0	0	0	0	0	1	0	1	0	0	0	1	0	1	1.56054	-1.053	0.285714	0.0818987	0.979	#DIV/0!	0.46457	-0.686
Q6IRU2	Tropomyosin alpha-4 chain OS=Mus musculus GN=Tpm4 PE=2 SV=3	TPM4_MOUSE	Tpm4	0	0	0	4	1	0	0	0	0	2	0	0	1	0	0	1	1	0	1	0	0	0	0	0	0.25663	-0.465	0.6	0.0365938	-0.153	0.5	0.241879	-0.507
Q5FW60	Major urinary protein 20 OS=Mus musculus GN=Mup20 PE=1 SV=1	MUP20_MOUSE	Mup20 Mup24	0	0	0	15	20	20	0	0	0	8	11	7	0	0	0	10	10	10	0	0	0	17	13	10	7.15198	-0.836	0.545455	1.72356	0.557	1.53846	1.42944	-0.419
P47791	Isoform Cytoplasmic of Glutathione reductase, mitochondrial OS=Mus musculus GN=Gsr	GSHR_MOUSE	Gsr Gr1	5	2	1	0	0	0	2	4	3	0	3	1	1	1	1	1	0	1	0	3	4	2	1	1	0.324231	-0.503	0.625	0.0233852	-0.383	0.846154	0.413119	-0.674
Q9R111	Guanine deaminase OS=Mus musculus GN=Gda PE=1 SV=1	GUAD_MOUSE	Gda	6	3	4	1	4	2	1	3	3	0	2	1	3	2	4	2	3	1	2	3	3	1	0	0	0.370109	-0.723	0.75	0.039049	0	0.9	0.258477	-0.548
O54819	Isoform Beta of Tissue factor pathway inhibitor OS=Mus musculus GN=Tfpi	TFPI1_MOUSE	Tfpi	6	5	6	2	2	3	5	9	4	6	7	6	4	2	3	2	4	3	3	8	6	5	6	6	0.68005	-1.052	0.75	0.0118664	-0.391	0.918919	0.520751	-1.079
Q08761	Vitamin K-dependent protein S OS=Mus musculus GN=Pros1 PE=2 SV=1	PROS_MOUSE	Pros1 Pros	22	23	26	15	24	19	18	22	21	11	12	14	19	25	24	12	26	25	14	21	22	13	14	13	0.08436	0	1.0155	0.0571811	0.371	0.989796	0.177487	0.305
P34884	Macrophage migration inhibitory factor OS=Mus musculus GN=Mif PE=1 SV=2	MIF_MOUSE	Mif	1	2	3	2	2	1	0	1	1	0	0	0	4	1	3	1	2	2	1	1	1	0	0	0	0.102142	0.62	1.18182	0.0186459	0.624	1.5	0.246436	0.6
Q9R1P3	Proteasome subunit beta type-2 OS=Mus musculus GN=Psmb2 PE=1 SV=1	PSB2_MOUSE	Psmb2	5	11	9	2	6	2	3	5	7	0	0	1	6	5	6	6	4	5	1	3	5	2	0	0	0.00498515	0	0.914286	0.168173	-0.456	0.6875	0.0293799	-0.163
P09036	Serine protease inhibitor Kazal-type 3 OS=Mus musculus GN=Spink3 PE=1 SV=1	ISK1_MOUSE	Spink1 Spink3	1	0	0	0	0	0	6	5	3	3	1	3	0	0	0	0	0	0	2	5	6	2	2	0	0.0176909	-0.663	0	0.159874	-0.52	0.809524	0.320693	-0.501
Q8BHC0	Lymphatic vessel endothelial hyaluronic acid receptor 1 OS=Mus musculus GN=Lyve1 PE=1 SV=1	LYVE1_MOUSE	Lyve1 Crsbp1 Xlkd1	3	3	3	2	2	1	4	8	8	2	2	3	4	3	2	2	2	3	6	3	4	3	1	1	0.0946438	0.683	1.14286	0.260067	-0.552	0.666667	0.00241283	-0.167
Q9WVH9	Fibulin-5 OS=Mus musculus GN=Fbln5 PE=2 SV=1	FBLN5_MOUSE	Fbln5 Dance	4	2	1	4	5	4	0	1	0	0	2	0	0	1	0	3	7	2	1	1	0	1	2	0	1.66193	-1.143	0.65	0.0911015	0.632	1.66667	0.721987	-0.671
Q8BG07	Isoform 2 of Phospholipase D4 OS=Mus musculus GN=Pld4	PLD4_MOUSE	Pld4	1	1	1	2	1	1	1	0	0	0	0	0	1	1	1	1	1	0	0	0	0	0	0	0	0.0952022	-0.829	0.714286	0.000229531	-0.598	0	0.215652	-0.781
P04938	Major urinary proteins 11 and 8 (Fragment) OS=Mus musculus GN=Mup8 PE=1 SV=1	MUP8_MOUSE	Mup8; Mup11	0	0	8	0	0	0	0	0	0	0	0	0	0	0	5	0	0	0	0	0	0	0	0	0	0.0492272	-0.183	0.625	0.166667	0	#DIV/0!	0.038012	-0.183
Q3V2D2	Uncharacterized protein C5orf46 homolog OS=Mus musculus GN=Gm94 PE=2 SV=1	CE046_MOUSE	Gm94	0	1	1	0	2	1	0	2	2	2	1	3	0	1	0	1	1	1	0	2	0	2	2	1	0.0280594	0	0.8	0.0887331	-0.609	0.7	0.0775587	-0.582
Q61207	Sulfated glycoprotein 1 OS=Mus musculus GN=Psap PE=1 SV=2	SAP_MOUSE	Psap Sgp1	20	23	18	15	31	20	11	15	19	15	9	5	25	7	24	9	27	23	14	20	21	10	11	11	0.430098	-0.497	0.905512	1.84627	1.362	1.17568	0.0458612	0
P39061	Isoform 3 of Collagen alpha-1(XVIII) chain OS=Mus musculus GN=Col18a1	COIA1_MOUSE	Col18a1	2	1	2	0	1	1	3	2	1	1	2	2	4	1	1	0	1	1	1	3	4	1	3	1	0.00611669	0	1.14286	0.00508597	0.343	1.18182	0.0604104	0.442
Q8K2I4	Beta-mannosidase OS=Mus musculus GN=Manba PE=2 SV=1	MANBA_MOUSE	Manba Bmn	1	0	0	0	0	1	0	0	0	0	0	0	0	1	0	0	1	1	0	0	0	0	0	1	0.0058688	0	1.5	0.000907433	0.569	#DIV/0!	0.0228742	0.511
Q5M6W3	Clathrin heavy chain linker domain-containing protein 1 OS=Mus musculus GN=Clhc1 PE=2 SV=1	CLHC1_MOUSE	Clhc1	0	0	1	1	0	0	0	0	0	0	0	0	0	0	2	0	1	0	0	0	0	0	1	0	0.000892428	0	1.5	0.000723373	0.571	#DIV/0!	0.0364995	0.482
P14483	H-2 class II histocompatibility antigen, A beta chain OS=Mus musculus GN=H2-Ab1 PE=1 SV=1	HB2A_MOUSE	H2-Ab1 H2-iabeta	0	0	0	1	0	1	0	0	0	0	0	0	0	0	0	0	1	1	0	0	2	0	0	0	0.0146809	-0.213	1	0.0474549	0.696	#DIV/0!	5.00262e-07	0.296
P39655	Arachidonate 12-lipoxygenase, 12S-type OS=Mus musculus GN=Alox12 PE=1 SV=4	LOX12_MOUSE	Alox12 Alox12p	0	0	0	0	1	0	0	1	0	0	0	0	1	0	1	0	0	2	0	0	0	0	0	0	0.719409	1.212	4	0.0128422	-0.503	0	0.261136	0.89
P27784	C-C motif chemokine 6 OS=Mus musculus GN=Ccl6 PE=1 SV=1	CCL6_MOUSE	Ccl6 C10 Scya6	0	0	0	0	0	0	1	1	0	0	0	0	1	0	0	0	0	0	3	0	0	0	0	0	0.00566811	0.635	#DIV/0!	0.0913658	0.437	1.5	0.265138	0.682
Q9CQ89	Protein CutA OS=Mus musculus GN=Cuta PE=2 SV=3	CUTA_MOUSE	Cuta	0	0	0	0	0	0	1	0	1	0	0	0	0	0	0	0	0	0	1	1	1	0	1	0	0.166667	0	#DIV/0!	0.0926453	0.849	2	0.0608993	0.741
Q7TME0	Lipid phosphate phosphatase-related protein type 4 OS=Mus musculus GN=Lppr4 PE=2 SV=2	LPPR4_MOUSE	Lppr4 D3Bwg0562e Kiaa0455 Prg1	0	0	0	0	0	0	0	0	0	2	0	0	0	0	0	1	0	0	0	0	0	2	0	1	0.0299725	0.681	#DIV/0!	5.86879e-06	0.313	1.5	0.120407	-0.072
O08997	Copper transport protein ATOX1 OS=Mus musculus GN=Atox1 PE=1 SV=1	ATOX1_MOUSE	Atox1	2	3	2	2	0	1	1	1	2	2	2	2	4	2	2	2	1	1	3	1	1	2	2	2	0.0813376	0.5	1.2	0.0418411	0.558	1.1	0.230266	0.762
P12382	ATP-dependent 6-phosphofructokinase, liver type OS=Mus musculus GN=Pfkl PE=1 SV=4	PFKAL_MOUSE	Pfkl Pfk-l Pfkb	2	0	1	0	0	0	0	0	0	0	0	0	0	0	0	0	0	1	0	0	0	0	0	0	0.225892	-0.705	0.333333	0.166667	0	#DIV/0!	0.145766	-0.685
P16110	Galectin-3 OS=Mus musculus GN=Lgals3 PE=1 SV=3	LEG3_MOUSE	Lgals3	1	0	0	0	1	1	0	0	0	0	0	0	0	0	0	1	0	0	0	0	0	0	0	0	0.0911501	-0.697	0.333333	0.166667	0	#DIV/0!	0.0588758	-0.653
P49300	C-type lectin domain family 10 member A OS=Mus musculus GN=Clec10a PE=1 SV=1	CLC10_MOUSE	Clec10a Mgl Mgl1	3	0	0	0	0	0	0	0	0	0	0	0	1	0	0	0	0	0	0	0	0	0	0	0	0.313384	-0.582	0.333333	0.166667	0	#DIV/0!	0.204599	-0.581
P62204	Calmodulin OS=Mus musculus GN=Calm1 PE=1 SV=2	CALM_MOUSE	Calm1 Calm Cam Cam1; Calm2 Cam2 Camb; Calm3 Cam3 Camc	1	1	0	1	0	0	0	0	0	0	0	0	1	0	0	0	0	0	0	0	0	0	0	0	0.259569	-0.955	0.333333	0.166667	0	#DIV/0!	0.168501	-0.877
Q8BUR4	Isoform 2 of Dedicator of cytokinesis protein 1 OS=Mus musculus GN=Dock1	DOCK1_MOUSE	Dock1	1	0	2	0	0	0	0	0	0	0	0	0	0	0	0	0	0	0	0	0	1	0	0	0	0.614062	-1.17	0	0.00586536	0.534	#DIV/0!	0.158512	-0.818
Q8R422	CD109 antigen OS=Mus musculus GN=Cd109 PE=2 SV=1	CD109_MOUSE	Cd109	1	0	1	0	1	0	0	0	0	0	0	0	0	1	0	0	0	0	0	0	0	0	0	0	0.0933052	-0.747	0.333333	0.166667	0	#DIV/0!	0.0594574	-0.697
Q9QUG2	Isoform 2 of DNA polymerase kappa OS=Mus musculus GN=Polk	POLK_MOUSE	Polk Dinb1	1	0	0	0	1	1	0	0	0	0	0	0	0	0	0	1	0	0	0	0	0	0	0	0	0.0911501	-0.697	0.333333	0.166667	0	#DIV/0!	0.0588758	-0.653
Q9WV91	Prostaglandin F2 receptor negative regulator OS=Mus musculus GN=Ptgfrn PE=1 SV=2	FPRP_MOUSE	Ptgfrn Fprp	1	0	2	0	0	0	0	0	0	0	0	0	0	1	0	0	0	0	0	0	0	0	0	0	0.119365	-0.656	0.333333	0.166667	0	#DIV/0!	0.0764198	-0.632
Q9Z0J1	Reversion-inducing cysteine-rich protein with Kazal motifs OS=Mus musculus GN=Reck PE=2 SV=2	RECK_MOUSE	Reck	2	0	1	0	0	0	0	0	0	0	0	0	0	0	1	0	0	0	0	0	0	0	0	0	0.207514	-0.684	0.333333	0.166667	0	#DIV/0!	0.134171	-0.665
Q61475	Complement decay-accelerating factor, GPI-anchored OS=Mus musculus GN=Cd55 PE=2 SV=2	DAF1_MOUSE	Cd55 Cd55a Daf Daf1	0	1	1	0	0	1	0	0	0	0	0	0	1	0	0	0	0	0	0	0	0	0	0	0	0.127193	-0.823	0.333333	0.166667	0	#DIV/0!	0.0811176	-0.763
Q924H2	Mediator of RNA polymerase II transcription subunit 15 OS=Mus musculus GN=Med15 PE=2 SV=2	MED15_MOUSE	Med15 Pcqap	0	1	1	0	1	0	0	0	0	0	0	0	0	0	1	0	0	0	0	0	0	0	0	0	0.0599513	-0.706	0.333333	0.166667	0	#DIV/0!	0.0378168	-0.659
P54279	Mismatch repair endonuclease PMS2 OS=Mus musculus GN=Pms2 PE=2 SV=1	PMS2_MOUSE	Pms2	0	0	2	0	0	0	0	1	0	0	0	0	0	0	0	0	0	0	0	0	0	1	0	0	0.135023	-0.747	0	0.0904009	0.094	1	0.0484478	-0.629
Q8R4G6	Alpha-1,6-mannosylglycoprotein 6-beta-N-acetylglucosaminyltransferase A OS=Mus musculus GN=Mgat5 PE=2 SV=1	MGT5A_MOUSE	Mgat5	0	0	1	0	0	0	0	0	0	0	1	1	0	0	0	0	0	0	0	0	0	0	0	1	6.29554e-05	-0.596	0	0.000331124	-0.469	0.5	0.0726443	-0.825
E9Q401	Ryanodine receptor 2 OS=Mus musculus GN=Ryr2 PE=1 SV=1	RYR2_MOUSE	Ryr2	0	0	0	2	0	0	0	0	0	0	0	1	0	0	0	0	0	0	0	1	0	0	0	0	0.387514	-0.805	0	0.0806344	-0.106	1	0.255253	-0.819
Q8VE62	Polyadenylate-binding protein-interacting protein 1 OS=Mus musculus GN=Paip1 PE=2 SV=1	PAIP1_MOUSE	Paip1	0	0	0	1	0	2	0	0	0	0	0	0	0	0	0	1	0	0	0	0	0	0	0	0	0.174533	-0.657	0.333333	0.166667	0	#DIV/0!	0.114191	-0.634
P02802	Metallothionein-1 OS=Mus musculus GN=Mt1 PE=1 SV=1	MT1_MOUSE	Mt1	0	0	0	0	0	0	1	1	1	0	0	0	0	0	0	0	0	0	1	0	0	0	0	0	0.166667	0	#DIV/0!	0.00362978	-0.496	0.333333	0.00224285	-0.472
P58771	Isoform 2 of Tropomyosin alpha-3 chain OS=Mus musculus GN=Tpm3	TPM1_MOUSE	Tpm1 Tpm-1 Tpma	0	0	0	0	0	0	1	0	0	0	0	2	0	0	0	0	0	0	0	0	0	1	0	0	0.166667	0	#DIV/0!	0.132743	-0.733	0.333333	0.0826624	-0.709
P60041	Somatostatin OS=Mus musculus GN=Sst PE=2 SV=1	SMS_MOUSE	Sst Smst	0	0	0	0	0	0	1	1	1	0	0	0	0	0	0	0	0	0	0	0	0	0	1	0	0.166667	0	#DIV/0!	0.0284033	-0.7	0.333333	0.0173186	-0.658
P70255	Isoform 7 of Nuclear factor 1 A-type OS=Mus musculus GN=Nfia	NFIC_MOUSE	Nfic	0	0	0	0	0	0	0	1	1	0	1	0	0	0	0	0	0	0	1	0	0	0	0	0	0.166667	0	#DIV/0!	0.00175427	-0.477	0.333333	0.0010815	-0.455
Q61039	Heart- and neural crest derivatives-expressed protein 2 OS=Mus musculus GN=Hand2 PE=1 SV=3	HAND2_MOUSE	Hand2 Dhand Hed Thing2	0	0	0	0	0	0	0	1	1	0	1	0	0	0	0	0	0	0	0	0	1	0	0	0	0.166667	0	#DIV/0!	0.0375453	-0.772	0.333333	0.022713	-0.722
P35700	Peroxiredoxin-1 OS=Mus musculus GN=Prdx1 PE=1 SV=1	PRDX1_MOUSE	Prdx1 Msp23 Paga Tdpx2	2	4	4	2	2	4	0	2	2	0	0	0	5	3	4	5	1	0	3	2	2	0	0	0	0.0300909	0	1	0.622656	0.865	1.75	0.437622	0.542
Q60805	Tyrosine-protein kinase Mer OS=Mus musculus GN=Mertk PE=1 SV=1	MERTK_MOUSE	Mertk Mer	5	6	5	5	5	5	2	1	0	0	0	0	9	0	3	2	6	4	2	1	0	0	1	0	0.884619	-0.901	0.774194	0.0149868	0.373	1.33333	0.496811	-0.462
Q80T19	Hepcidin-2 OS=Mus musculus GN=Hamp2 PE=2 SV=1	HEPC2_MOUSE	Hamp2 Hepc2	4	3	2	0	0	0	2	1	2	1	1	0	0	5	3	0	0	0	0	2	2	0	0	0	0.00226981	0	0.888889	0.223073	-0.852	0.571429	0.159812	-0.37
P27656	Hepatic triacylglycerol lipase OS=Mus musculus GN=Lipc PE=2 SV=2	LIPC_MOUSE	Lipc Hpl	6	7	5	5	10	4	7	6	3	3	4	4	7	5	3	5	10	11	5	4	6	4	4	3	0.220336	0.611	1.10811	0.012537	0.028	0.962963	0.151418	0.418
Q62165	Dystroglycan OS=Mus musculus GN=Dag1 PE=1 SV=4	DAG1_MOUSE	Dag1 Dag-1	3	4	1	2	4	3	1	2	2	1	1	1	5	2	1	3	2	1	2	1	0	1	2	0	0.0515672	-0.391	0.823529	0.00725057	-0.195	0.75	0.0728925	-0.365
Q8BHN3	Isoform 2 of Neutral alpha-glucosidase AB OS=Mus musculus GN=Ganab	GANAB_MOUSE	Ganab G2an Kiaa0088	4	4	2	6	9	5	2	3	1	5	3	2	3	2	4	6	3	7	2	1	1	3	4	3	0.111149	-0.395	0.833333	0.000861823	-0.175	0.875	0.127133	-0.354
Q9DBJ1	Phosphoglycerate mutase 1 OS=Mus musculus GN=Pgam1 PE=1 SV=3	PGAM1_MOUSE	Pgam1	6	8	5	2	5	4	2	4	4	2	3	5	12	5	3	3	5	3	4	6	6	1	3	2	0.02789	0	1.03333	0.0706114	0.472	1.1	0.147525	0.351
P31786	Acyl-CoA-binding protein OS=Mus musculus GN=Dbi PE=1 SV=2	ACBP_MOUSE	Dbi	8	8	6	4	6	8	0	0	0	0	0	0	16	7	10	0	3	3	1	0	3	0	0	0	0.00805545	0	0.975	0.731703	1.152	#DIV/0!	0.0597826	0
O08795	Isoform 2 of Glucosidase 2 subunit beta OS=Mus musculus GN=Prkcsh	GLU2B_MOUSE	Prkcsh	1	1	0	0	0	1	1	2	0	2	0	1	0	0	0	0	1	0	2	0	1	1	1	0	0.314357	-1.097	0.333333	0.0605286	0	0.833333	0.125036	-0.671
P97807	Isoform Cytoplasmic of Fumarate hydratase, mitochondrial OS=Mus musculus GN=Fh	FUMH_MOUSE	Fh Fh1	1	0	1	0	1	0	1	1	1	1	1	1	0	0	2	0	0	0	1	0	0	1	1	1	0.00345714	-0.223	0.666667	0.00503228	-0.622	0.666667	0.042879	-0.541
Q8CI94	Glycogen phosphorylase, brain form OS=Mus musculus GN=Pygb PE=1 SV=3	PYGB_MOUSE	Pygb	0	0	4	0	1	3	0	0	1	0	0	0	2	0	1	0	0	0	0	0	2	1	0	0	0.880451	-0.833	0.375	0.0663857	0.711	3	0.181407	-0.491
P28654	Decorin OS=Mus musculus GN=Dcn PE=2 SV=1	PGS2_MOUSE	Dcn	0	0	0	4	0	3	0	0	0	0	1	1	1	1	1	1	1	1	0	0	0	0	0	0	0.0588611	-0.314	0.857143	0.119207	-1.014	0	0.319991	-0.554
P10404	MLV-related proviral Env polyprotein OS=Mus musculus PE=1 SV=3	ENV1_MOUSE	0	3	2	2	5	5	6	0	0	2	4	4	3	2	5	1	3	1	5	0	5	2	3	1	2	0.477217	-0.695	0.73913	0.00222946	-0.123	1	0.411313	-0.594
Q9R1P0	Proteasome subunit alpha type-4 OS=Mus musculus GN=Psma4 PE=1 SV=1	PSA4_MOUSE	Psma4	11	6	9	3	7	7	1	1	1	0	1	0	4	8	7	3	7	6	1	1	1	1	0	1	0.604118	-0.767	0.813953	0.00324044	0.545	1.25	0.373728	-0.35
B2RXC5	Zinc finger protein 382 OS=Mus musculus GN=Znf382 PE=1 SV=1	ZN382_MOUSE	Znf382 Zfp382	0	0	0	0	0	0	0	1	2	0	0	0	0	0	0	0	0	0	0	0	1	2	2	0	0.166667	0	#DIV/0!	0.137522	0.7	1.66667	0.0929665	0.645
P47878	Insulin-like growth factor-binding protein 3 OS=Mus musculus GN=Igfbp3 PE=2 SV=2	IBP3_MOUSE	Igfbp3 Igfbp-3	11	10	9	14	13	14	17	15	14	18	19	19	13	5	8	13	12	7	18	15	14	15	19	18	1.0862	-0.874	0.816901	0.00829531	0.148	0.970588	0.340942	-0.535
P21460	Cystatin-C OS=Mus musculus GN=Cst3 PE=2 SV=2	CYTC_MOUSE	Cst3	12	16	18	9	11	8	14	18	21	24	17	18	13	8	18	15	18	17	12	17	15	12	21	18	2.02513	1.344	1.2027	0.397499	-0.876	0.848214	0.273104	0.586
E9Q414	Apolipoprotein B-100 OS=Mus musculus GN=Apob PE=1 SV=1	APOB_MOUSE	Apob	220	197	150	153	215	191	297	330	221	216	216	217	200	167	155	113	212	143	275	347	270	215	215	218	8.91724	-1.079	0.879218	4.94754	0.593	1.02872	0.190331	-0.134
Q9QUM9	Proteasome subunit alpha type-6 OS=Mus musculus GN=Psma6 PE=1 SV=1	PSA6_MOUSE	Psma6	15	22	19	8	13	10	8	11	12	6	8	10	17	17	20	11	12	12	6	12	14	6	10	6	0.236978	0	1.02299	4.63007e-05	0.122	0.981818	0.205302	0.289
Q8BHK6	Isoform 4 of SLAM family member 7 OS=Mus musculus GN=Slamf7	SLAF7_MOUSE	Slamf7	2	0	1	0	0	0	1	0	0	0	0	0	2	0	0	0	0	0	1	0	1	1	1	0	0.00944177	-0.31	0.666667	0.305501	1.203	4	0.0102729	0.323
Q9QXF8	Glycine N-methyltransferase OS=Mus musculus GN=Gnmt PE=1 SV=3	GNMT_MOUSE	Gnmt	1	1	1	1	0	0	0	0	0	0	0	0	4	1	0	1	0	0	0	0	0	0	0	0	0.144658	0.476	1.5	0.166667	0	#DIV/0!	0.109197	0.435
P18181	CD48 antigen OS=Mus musculus GN=Cd48 PE=1 SV=1	CD48_MOUSE	Cd48 Bcm-1	0	1	1	0	0	0	0	1	0	0	0	1	1	0	1	0	0	0	1	0	0	0	1	2	0.0461117	0	1	0.15068	0.796	2	0.119336	0.725
P15945	Kallikrein-1 OS=Mus musculus GN=Klk1 PE=1 SV=3	K1KB5_MOUSE	Klk1b5 Klk-5 Klk5	0	0	0	2	0	2	0	0	0	0	0	0	1	1	1	1	0	2	0	0	0	0	0	0	0.0791254	0.49	1.5	0.166667	0	#DIV/0!	0.060009	0.42
Q01102	P-selectin OS=Mus musculus GN=Selp PE=1 SV=1	LYAM3_MOUSE	Selp Grmp	0	0	0	0	1	0	1	1	1	0	0	0	0	0	1	1	0	0	0	2	1	0	0	1	0.0706298	0.694	2	0.00206273	0.317	1.33333	0.130379	0.79
Q9R069	Basal cell adhesion molecule OS=Mus musculus GN=Bcam PE=2 SV=1	BCAM_MOUSE	Bcam Gplu Lu	0	0	0	0	0	0	0	1	1	0	1	1	0	0	0	0	0	0	1	1	1	1	1	1	0.166667	0	#DIV/0!	0.0947988	1.16	1.5	0.0676495	0.738
Q61468	Mesothelin OS=Mus musculus GN=Msln PE=1 SV=1	MSLN_MOUSE	Msln Mes Mpf	1	2	2	0	2	0	0	0	0	1	1	1	1	0	2	1	2	1	0	0	0	0	0	0	0.00495235	0	1	0.374729	-1.434	0	0.043202	-0.431
Q3UR85	Isoform 4 of Myelin regulatory factor OS=Mus musculus GN=Myrf	MRF_MOUSE	Myrf Gm1804 Gm98 Mrf	0	1	1	3	3	1	0	1	0	0	0	0	1	0	0	1	3	2	0	0	0	0	0	0	0.112063	-0.497	0.777778	0.0128422	-0.503	0	0.179348	-0.516
P33587	Vitamin K-dependent protein C OS=Mus musculus GN=Proc PE=1 SV=2	PROC_MOUSE	Proc	19	22	15	20	24	15	19	26	23	27	20	21	20	20	17	13	20	19	17	29	17	31	22	22	0.0410507	-0.293	0.947826	0.208885	0.639	1.01471	0.0160989	0
Q61268	Apolipoprotein C-IV OS=Mus musculus GN=Apoc4 PE=2 SV=1	APOC4_MOUSE	Apoc4 Acl	11	12	10	8	11	7	14	15	16	20	19	23	13	13	7	8	15	12	11	14	10	20	15	13	0.727364	1.18	1.15254	1.7094	-1.261	0.775701	0.101833	-0.369
Q62000	Mimecan OS=Mus musculus GN=Ogn PE=2 SV=1	MIME_MOUSE	Ogn Og	2	2	1	0	0	0	0	0	0	0	0	0	1	2	1	2	1	0	0	0	0	0	0	0	0.162867	0.603	1.4	0.166667	0	#DIV/0!	0.126371	0.499
Q8CIE0	Serpin A11 OS=Mus musculus GN=Serpina11 PE=2 SV=1	SPA11_MOUSE	Serpina11 Gm895	1	0	0	1	0	0	1	1	1	0	0	0	2	0	0	0	2	1	1	0	0	1	0	0	0.168973	0.668	2.5	0.0450987	-0.124	0.666667	0.0617851	0.525
Q9ET01	Glycogen phosphorylase, liver form OS=Mus musculus GN=Pygl PE=1 SV=4	PYGL_MOUSE	Pygl	0	2	0	3	0	0	0	0	0	0	0	0	3	3	0	0	0	0	0	0	0	0	0	1	0.000285111	0	1.2	0.000907433	0.569	#DIV/0!	0.026614	0
P16294	Coagulation factor IX OS=Mus musculus GN=F9 PE=2 SV=3	FA9_MOUSE	F9 Cf9	22	20	14	14	26	15	8	11	10	7	8	8	19	15	14	14	20	20	11	9	8	9	8	14	0.141302	-0.465	0.918919	0.893649	1.206	1.13462	0.0209139	0
Q9R100	Cadherin-17 OS=Mus musculus GN=Cdh17 PE=1 SV=1	CAD17_MOUSE	Cdh17	3	2	2	1	1	1	0	0	1	0	0	0	0	2	1	1	3	0	0	1	0	0	0	0	0.349224	-0.853	0.7	0.111689	0.049	1	0.255388	-0.62
P01637	Ig kappa chain V-V region L6 (Fragment) OS=Mus musculus PE=4 SV=1	KV5A5_MOUSE	0	1	0	1	0	0	0	2	1	1	0	0	0	0	0	0	0	0	0	5	3	0	0	0	0	0.227825	-1.073	0	0.952532	0.71	2	0.118629	0.363
Q9EPX2	Papilin OS=Mus musculus GN=Papln PE=2 SV=2	PPN_MOUSE	Papln	6	6	5	4	5	2	0	0	1	0	2	0	2	3	3	6	2	2	1	1	0	1	4	1	1.22109	-1.117	0.642857	0.934833	1.118	2.66667	0.182544	-0.345
B9EKR1	Receptor-type tyrosine-protein phosphatase zeta OS=Mus musculus GN=Ptprz1 PE=1 SV=1	PRPTZ_MOUSE	Ptprz1	1	1	0	1	0	0	0	1	0	0	0	0	0	0	1	1	0	0	0	0	0	0	0	0	0.00294787	-0.378	0.666667	0.0128422	-0.503	0	0.0418757	-0.551
Q3U0X8	T-cell surface protein tactile OS=Mus musculus GN=Cd96 PE=2 SV=1	TACT_MOUSE	Cd96	2	0	1	1	0	0	0	0	0	0	0	0	0	0	1	1	0	0	0	0	0	0	0	0	0.154041	-0.634	0.5	0.166667	0	#DIV/0!	0.10754	-0.584
Q60751	Insulin-like growth factor 1 receptor OS=Mus musculus GN=Igf1r PE=1 SV=3	IGF1R_MOUSE	Igf1r	1	1	1	0	1	0	0	0	0	0	0	0	0	0	1	0	1	0	0	0	0	0	0	0	0.128607	-0.849	0.5	0.166667	0	#DIV/0!	0.0868725	-0.734
O88621	Isoform Short of Forkhead box protein H1 OS=Mus musculus GN=Foxh1	FOXH1_MOUSE	Foxh1 Fast1 Fast2	0	1	1	0	0	0	1	1	0	0	0	0	0	0	0	0	0	1	1	0	0	0	0	0	0.000161837	-0.387	0.5	0.0289789	-0.204	0.5	0.0110777	-0.475
P10639	Thioredoxin OS=Mus musculus GN=Txn PE=1 SV=3	THIO_MOUSE	Txn Txn1	0	1	1	1	0	1	0	0	0	0	0	0	1	0	1	0	0	0	0	0	0	0	0	0	0.138167	-0.817	0.5	0.166667	0	#DIV/0!	0.095041	-0.705
P23116	Eukaryotic translation initiation factor 3 subunit A OS=Mus musculus GN=Eif3a PE=1 SV=5	EIF3A_MOUSE	Eif3a Csma Eif3 Eif3s10	0	1	1	0	0	1	0	0	1	0	0	0	1	0	0	1	0	0	0	0	0	0	0	0	0.00819948	-0.231	0.666667	0.013572	-0.5	0	0.00788414	-0.427
P01676	Ig kappa chain V-VI region J539 OS=Mus musculus PE=1 SV=1	KV6A2_MOUSE	0	0	0	2	0	0	0	0	0	1	0	0	1	0	0	0	0	0	0	0	2	0	0	0	0	0.135023	-0.747	0	0.0831944	-0.047	1	0.0783591	-0.635
Q8CC86	Nicotinate phosphoribosyltransferase OS=Mus musculus GN=Naprt1 PE=2 SV=1	PNCB_MOUSE	Naprt Naprt1	0	0	0	1	0	1	1	1	0	0	0	0	1	0	0	0	1	0	0	0	0	0	0	0	0.0169041	-0.202	1	0.0719787	-0.953	0	0.0943981	-0.745
P15946	Kallikrein 1-related peptidase b21 OS=Mus musculus GN=Klk1b21 PE=2 SV=3	K1B11_MOUSE	Klk1b11 Klk-11 Klk11	0	0	0	0	0	0	2	0	0	1	0	1	0	0	0	0	0	0	1	0	0	0	1	0	0.166667	0	#DIV/0!	0.0438893	-0.544	0.5	0.0293422	-0.505
Q8BIS8	Coiled-coil domain-containing protein 126 OS=Mus musculus GN=Ccdc126 PE=2 SV=1	CC126_MOUSE	Ccdc126	0	0	0	0	0	0	0	1	1	1	0	1	0	0	0	0	0	0	0	1	0	0	1	0	0.166667	0	#DIV/0!	0.0253231	-0.689	0.5	0.0163611	-0.606
Q922U2	Keratin, type II cytoskeletal 5 OS=Mus musculus GN=Krt5 PE=1 SV=1	K2C5_MOUSE	Krt5 Krt2-5	0	0	0	0	0	0	0	0	4	0	0	0	0	0	0	0	0	0	2	0	0	0	0	0	0.166667	0	#DIV/0!	0.045986	-0.063	0.5	0.0300454	-0.063
P01657	Ig kappa chain V-I region S107A OS=Mus musculus GN=Igkv7-33 PE=4 SV=1	KV3A5_MOUSE	0	0	0	0	0	0	0	0	0	0	2	0	2	0	1	0	1	0	0	0	0	0	0	0	0	0.349019	1.128	#DIV/0!	0.737366	-1.211	0	0.00032161	-0.243
O35350	Calpain-1 catalytic subunit OS=Mus musculus GN=Capn1 PE=1 SV=1	CAN1_MOUSE	Capn1 Canp1 Capa1	2	3	2	0	0	0	0	0	0	0	0	0	1	2	2	1	0	2	0	0	1	0	0	0	0.0361108	0	1.14286	0.00586536	0.534	#DIV/0!	0.0971756	0.427
O88593	Peptidoglycan recognition protein 1 OS=Mus musculus GN=Pglyrp1 PE=2 SV=1	PGRP1_MOUSE	Pglyrp1 Pglyrp Pgrp Pgrps Tag7	2	1	0	2	0	2	0	0	0	0	0	0	2	0	3	0	0	2	0	1	1	0	0	0	0.00402719	0	1	0.0450563	0.932	#DIV/0!	0.000368546	0
P05063	Fructose-bisphosphate aldolase C OS=Mus musculus GN=Aldoc PE=1 SV=4	ALDOC_MOUSE	Aldoc Aldo3 Scrg2	0	0	3	0	0	0	0	0	0	0	0	4	0	4	0	0	0	0	0	5	0	0	0	0	0.0753508	0	1.33333	0.0652168	0	1.25	0.0345688	0
P26043	Radixin OS=Mus musculus GN=Rdx PE=1 SV=3	RADI_MOUSE	Rdx	0	0	5	0	0	0	0	2	0	0	0	0	0	3	0	0	6	0	0	0	0	0	0	0	0.44024	0.471	1.8	0.0230152	-0.669	0	0.0891132	0.292
Q5DU28	Isoform 3 of Pecanex-like protein 2 OS=Mus musculus GN=Pcnxl2	PCX2_MOUSE	Pcnxl2 Kiaa0435	0	0	0	0	0	0	2	1	0	1	1	2	0	0	0	0	0	0	2	1	0	2	2	2	0.166667	0	#DIV/0!	0.0629192	0.591	1.28571	0.0491177	0.428
P07901	Heat shock protein HSP 90-alpha OS=Mus musculus GN=Hsp90aa1 PE=1 SV=4	HS90A_MOUSE	Hsp90aa1 Hsp86 Hsp86-1 Hspca	5	4	5	3	2	1	0	0	1	0	0	0	4	1	4	3	1	0	2	1	1	0	0	0	0.869242	-0.892	0.65	0.53395	1.065	4	0.150108	-0.338
Q9ES30	Complement C1q tumor necrosis factor-related protein 3 OS=Mus musculus GN=C1qtnf3 PE=2 SV=1	C1QT3_MOUSE	C1qtnf3 Cors26 Ctrp3	2	2	0	1	3	1	1	3	3	1	2	2	2	2	1	0	4	0	0	0	1	3	2	2	0.00757803	0	1	0.157759	-0.783	0.666667	0.124077	-0.597
P26339	Chromogranin-A OS=Mus musculus GN=Chga PE=1 SV=1	CMGA_MOUSE	Chga	6	2	4	7	3	3	4	3	3	4	2	3	6	6	4	1	4	1	3	3	2	2	3	3	0.235636	-0.439	0.88	0.0114213	-0.46	0.842105	0.301255	-0.53
Q9Z121	C-C motif chemokine 8 OS=Mus musculus GN=Ccl8 PE=2 SV=1	CCL8_MOUSE	Ccl8 Mcp2 Scya8	3	5	7	5	7	8	3	4	4	2	2	2	6	1	5	6	5	7	4	5	5	4	4	2	0.0984334	-0.426	0.857143	1.04266	2.112	1.41176	0.0633602	0.296
P70296	Phosphatidylethanolamine-binding protein 1 OS=Mus musculus GN=Pebp1 PE=1 SV=3	PEBP1_MOUSE	Pebp1 Pbp Pebp	3	1	1	2	1	1	0	0	0	0	0	0	4	2	1	1	1	1	1	0	0	0	0	0	0.000151991	0	1.11111	0.00913921	0.643	#DIV/0!	0.0387973	0.296
P28843	Dipeptidyl peptidase 4 OS=Mus musculus GN=Dpp4 PE=1 SV=3	DPP4_MOUSE	Dpp4 Cd26	6	4	0	2	2	2	1	2	1	0	1	1	2	1	4	1	2	2	1	1	1	1	1	1	0.508978	-0.664	0.75	0.018529	0.229	1	0.291557	-0.525
O35744	Chitinase-like protein 3 OS=Mus musculus GN=Chil3 PE=1 SV=2	CHIL3_MOUSE	Chil3 Chi3l3 Ym1	3	1	3	1	1	2	0	0	0	0	0	0	4	1	4	1	2	1	0	0	0	0	0	0	0.0564107	0	1.18182	0.166667	0	#DIV/0!	0.0480411	0.277
P99029	Isoform Cytoplasmic+peroxisomal of Peroxiredoxin-5, mitochondrial OS=Mus musculus GN=Prdx5	PRDX5_MOUSE	Prdx5 Prdx6	0	2	1	2	2	1	0	0	0	1	1	1	2	1	2	2	0	2	0	0	1	1	1	1	0.0680051	0.545	1.125	0.0067677	0.297	1.33333	0.108535	0.549
O89053	Coronin-1A OS=Mus musculus GN=Coro1a PE=1 SV=5	COR1A_MOUSE	Coro1a Coro1	0	0	2	0	1	1	0	1	2	1	1	2	1	0	1	3	0	0	0	2	3	0	2	1	0.170335	0.503	1.25	0.00146016	0.23	1.14286	0.180442	0.59
Q91YI0	Argininosuccinate lyase OS=Mus musculus GN=Asl PE=1 SV=1	ARLY_MOUSE	Asl	0	0	2	1	3	3	0	0	1	0	1	0	5	3	0	0	3	1	0	0	0	0	1	0	0.273042	0.51	1.33333	0.00714931	-0.353	0.5	0.114062	0.352
Q9Z0M9	Interleukin-18-binding protein OS=Mus musculus GN=Il18bp PE=1 SV=2	I18BP_MOUSE	Il18bp Igifbp	1	1	1	0	0	0	2	2	2	1	1	1	1	1	1	1	1	1	2	1	2	1	1	1	0.448243	1.593	2	0.0396848	-0.03	0.888889	0.185666	1.051
P01723	Ig lambda-1 chain V region S43 OS=Mus musculus PE=3 SV=1	LV1A_MOUSE	0	4	4	4	1	6	2	1	4	3	2	2	1	8	5	2	1	6	0	2	4	3	4	0	1	0.0194958	0	1.04762	0.0267913	0.426	1.07692	0.101637	0.33
P15532	Nucleoside diphosphate kinase B OS=Mus musculus GN=Nme2 PE=1 SV=1	NDKA_MOUSE	Nme1 Nm23	0	0	0	8	10	0	2	4	5	0	2	0	0	0	0	7	7	0	6	3	4	2	2	2	0.182452	-0.215	0.777778	1.48122	1.13	1.46154	0.148993	0
P27005	Protein S100-A8 OS=Mus musculus GN=S100a8 PE=1 SV=3	S10A8_MOUSE	S100a8 Caga Mrp8	2	2	2	1	3	0	0	0	2	0	0	2	3	1	3	1	1	1	0	0	1	3	1	1	4.80578e-05	0	1	0.0556949	0.486	1.5	0.085965	0.453
Q05020	Apolipoprotein C-II OS=Mus musculus GN=Apoc2 PE=2 SV=1	APOC2_MOUSE	Apoc2	34	43	34	17	25	11	63	68	67	80	63	68	42	59	29	30	37	24	37	99	50	61	51	37	12.7171	1.419	1.34756	4.89631	-1.298	0.819071	0.308257	0
Q60841	Isoform 3 of Reelin OS=Mus musculus GN=Reln	RELN_MOUSE	Reln Rl	3	4	5	1	0	0	0	1	1	0	0	0	5	3	5	0	0	1	1	1	1	0	0	0	0.032103	0	1.07692	0.0186459	0.624	1.5	0.133596	0.314
P09103	Protein disulfide-isomerase OS=Mus musculus GN=P4hb PE=1 SV=2	PDIA1_MOUSE	P4hb Pdia1	6	3	4	5	4	2	0	0	2	0	0	1	7	5	6	4	2	2	0	1	0	0	0	2	0.0912764	0	1.08333	0.0529325	0.076	1	0.0940846	0
Q91VE6	Isoform 2 of MKI67 FHA domain-interacting nucleolar phosphoprotein OS=Mus musculus GN=Nifk	MK67I_MOUSE	Nifk Mki67ip	0	1	1	0	2	0	4	4	5	7	5	6	1	2	2	0	2	0	2	4	3	5	4	5	0.527567	1.006	1.75	0.556002	-1.416	0.741935	0.0276298	-0.239
P17047	Isoform LAMP-2C of Lysosome-associated membrane glycoprotein 2 OS=Mus musculus GN=Lamp2	LAMP2_MOUSE	Lamp2 Lamp-2	3	1	1	2	4	1	0	1	1	1	1	1	4	2	1	1	3	2	2	1	1	1	0	1	0.00125639	0	1.08333	0.0283543	0.576	1.2	0.0697117	0.414
P15535	Isoform Short of Beta-1,4-galactosyltransferase 1 OS=Mus musculus GN=B4galt1	B4GT1_MOUSE	B4galt1 Ggtb Ggtb2	3	1	2	0	4	1	2	4	2	3	1	1	4	2	2	0	0	1	2	4	3	3	3	2	5.95406e-07	-0.152	0.818182	0.383711	1.55	1.30769	0.102811	0.511
P63101	14-3-3 protein zeta/delta OS=Mus musculus GN=Ywhaz PE=1 SV=1	1433Z_MOUSE	Ywhaz	1	2	4	2	1	1	1	3	2	2	1	2	2	1	2	1	2	1	4	3	4	3	0	1	0.0405575	-0.528	0.818182	0.526411	0.953	1.36364	0.0580209	0.459
P14430	H-2 class I histocompatibility antigen, Q8 alpha chain OS=Mus musculus GN=H2-Q8 PE=2 SV=1	HA18_MOUSE	H2-Q8	3	7	5	8	7	9	7	6	11	8	9	5	5	7	8	7	9	6	3	8	10	9	7	7	0.115239	0.479	1.07692	0.000281336	-0.133	0.956522	0.0356454	0.32
P33622	Apolipoprotein C-III OS=Mus musculus GN=Apoc3 PE=1 SV=2	APOC3_MOUSE	Apoc3	85	137	144	128	142	126	139	201	197	165	133	145	110	175	108	110	164	124	78	231	110	153	139	142	2.03486	0.604	1.03806	3.52595	-0.931	0.870408	0.0517568	-0.105
O09061	Proteasome subunit beta type-1 OS=Mus musculus GN=Psmb1 PE=1 SV=1	PSB1_MOUSE	Psmb1	10	10	10	10	10	9	4	4	6	2	1	0	5	8	11	10	11	8	1	3	4	3	4	0	0.149704	-0.561	0.898305	0.00306095	-0.113	0.882353	0.159834	-0.245
Q6S5C2	Isoform 2 of N-acetylglucosamine-1-phosphotransferase subunit gamma OS=Mus musculus GN=Gnptg	GNPTG_MOUSE	Gnptg Mdcp1	8	9	6	1	6	2	7	8	8	3	2	3	6	2	4	3	6	6	3	8	8	4	2	4	0.195809	-0.435	0.84375	0.00456586	-0.065	0.935484	0.140001	-0.406
O08677	Kininogen-1 OS=Mus musculus GN=Kng1 PE=1 SV=1	KNG1_MOUSE	Kng1 Kng	256	306	363	248	413	280	599	867	818	706	616	535	291	342	317	224	418	310	497	772	736	622	619	614	2.97466	1.204	1.01929	0.134509	-0.293	0.932142	0.591174	0
P31532	Serum amyloid A-4 protein OS=Mus musculus GN=Saa4 PE=1 SV=2	SAA4_MOUSE	Saa4 Saa5	18	22	22	20	27	28	36	49	57	36	35	40	18	23	17	20	38	41	26	38	36	41	34	47	1.6052	0.904	1.14599	0.405025	-0.855	0.87747	0.116683	0.296
Q02053	Ubiquitin-like modifier-activating enzyme 1 OS=Mus musculus GN=Uba1 PE=1 SV=1	UBA1_MOUSE	Uba1 Sbx Ube1 Ube1ax Ube1x	1	1	1	1	1	0	0	0	0	0	0	0	1	1	1	0	0	0	0	0	0	0	0	0	0.0772608	-0.754	0.6	0.166667	0	#DIV/0!	0.0557136	-0.586
Q8VCC9	Spondin-1 OS=Mus musculus GN=Spon1 PE=2 SV=1	SPON1_MOUSE	Spon1	1	1	1	0	0	1	1	0	0	0	0	0	0	0	1	0	0	0	0	0	2	0	0	0	0.51797	-1.317	0.25	0.0223677	0.215	2	0.180502	-0.829
Q3TYD4	Isoform 2 of Arylsulfatase G OS=Mus musculus GN=Arsg	ARSG_MOUSE	Arsg Kiaa1001	0	1	0	2	1	1	0	0	0	0	0	0	0	0	0	1	1	1	0	0	0	0	0	0	0.154574	-0.682	0.6	0.166667	0	#DIV/0!	0.111636	-0.594
P97467	Peptidyl-glycine alpha-amidating monooxygenase OS=Mus musculus GN=Pam PE=1 SV=2	AMD_MOUSE	Pam	0	0	0	1	0	0	1	2	1	0	0	0	0	0	0	0	0	0	1	2	0	0	0	0	0.0244441	-0.673	0	0.0379709	-0.107	0.75	0.0291174	-0.499
P97449	Aminopeptidase N OS=Mus musculus GN=Anpep PE=1 SV=4	AMPN_MOUSE	Anpep Lap-1 Lap1	11	7	5	8	9	7	4	7	5	4	1	3	9	9	6	5	7	8	4	6	7	4	5	2	0.0440222	-0.307	0.93617	0.379263	1.009	1.16667	0.0082002	0
Q91WP0	Mannan-binding lectin serine protease 2 OS=Mus musculus GN=Masp2 PE=1 SV=1	MASP2_MOUSE	Masp2	54	59	59	62	86	58	28	43	40	33	31	34	54	44	53	57	81	72	28	33	28	31	33	36	0.0771147	-0.247	0.955026	0.0425754	-0.361	0.904306	0.139687	-0.123
P01898	H-2 class I histocompatibility antigen, Q10 alpha chain OS=Mus musculus GN=H2-Q10 PE=1 SV=3	HA10_MOUSE	H2-Q10	74	62	61	64	109	83	49	66	81	80	66	61	51	51	33	63	120	89	38	80	55	95	78	74	2.60966	-0.669	0.898455	1.28213	0.746	1.04218	0.217261	-0.198
Q9Z2L6	Multiple inositol polyphosphate phosphatase 1 OS=Mus musculus GN=Minpp1 PE=1 SV=3	MINP1_MOUSE	Minpp1 Mipp MNCb-1572	7	9	5	4	11	5	4	6	8	3	2	2	6	4	5	5	11	6	3	7	8	2	2	6	0.0757702	-0.498	0.902439	0.217415	0.64	1.12	0.000794108	0
Q9CQF9	Prenylcysteine oxidase OS=Mus musculus GN=Pcyox1 PE=1 SV=1	PCYOX_MOUSE	Pcyox1 Kiaa0908	20	19	20	15	23	16	3	5	3	3	1	2	22	17	16	12	21	17	3	4	3	1	1	2	0.106342	-0.57	0.929204	0.0024378	-0.297	0.823529	0.145997	-0.15
P31809	Carcinoembryonic antigen-related cell adhesion molecule 2 OS=Mus musculus GN=Ceacam2 PE=1 SV=3	CEAM1_MOUSE	Ceacam1 Bgp Bgp1 Bgpd	0	1	0	0	1	0	3	2	2	3	2	1	0	0	0	0	0	0	2	1	1	4	3	1	0.124168	-1.015	0	0.0285249	-0.022	0.923077	0.0324045	-0.327
P14152	Malate dehydrogenase, cytoplasmic OS=Mus musculus GN=Mdh1 PE=1 SV=3	MDHC_MOUSE	Mdh1 Mor2	3	7	3	3	5	8	2	7	5	4	3	8	4	2	3	5	7	4	8	9	5	4	3	5	0.148667	-0.501	0.862069	0.621796	0.794	1.17241	0.0320504	0
P05201	Aspartate aminotransferase, cytoplasmic OS=Mus musculus GN=Got1 PE=1 SV=3	AATC_MOUSE	Got1	3	3	0	1	2	3	2	6	1	2	2	3	3	2	2	1	4	0	1	4	1	1	2	3	0.00279064	-0.12	1	0.125568	-0.653	0.75	0.108843	-0.533
F6VAN0	Cyclic AMP-dependent transcription factor ATF-6 alpha OS=Mus musculus GN=Atf6 PE=1 SV=2	ATF6A_MOUSE	Atf6	1	2	0	0	0	0	1	0	1	0	1	0	1	2	0	0	1	0	0	0	0	0	0	0	0.000119845	0	1.33333	0.339726	-1.397	0	0.0201625	-0.377
P19788	Matrix Gla protein OS=Mus musculus GN=Mgp PE=2 SV=1	MGP_MOUSE	Mgp Mglap	1	0	0	0	0	1	3	0	1	0	0	0	0	0	0	0	0	0	1	1	2	0	0	0	0.293749	-1.11	0	0.050356	-0.042	1	0.141283	-0.604
Q8VIK5	Isoform 3 of Platelet endothelial aggregation receptor 1 OS=Mus musculus GN=Pear1	PEAR1_MOUSE	Pear1 Jedi Megf12	1	1	1	1	1	1	0	0	0	0	0	0	1	0	1	2	0	0	0	0	0	0	0	0	0.0229254	-0.459	0.666667	0.166667	0	#DIV/0!	0.0172913	-0.363
P02798	Metallothionein-2 OS=Mus musculus GN=Mt2 PE=1 SV=2	MT2_MOUSE	Mt2	0	0	0	0	0	0	2	1	1	0	1	1	0	0	0	0	0	0	2	0	0	0	1	1	0.166667	0	#DIV/0!	0.000575034	-0.302	0.666667	0.000416952	-0.261
Q9Z126	Platelet factor 4 OS=Mus musculus GN=Pf4 PE=2 SV=1	PLF4_MOUSE	Pf4 Cxcl4 Scyb4	2	5	3	3	3	2	4	10	3	9	5	5	6	4	5	4	2	2	3	4	6	7	4	6	0.822039	1.128	1.27778	0.112364	-0.577	0.833333	0.0784801	0.438
P45700	Mannosyl-oligosaccharide 1,2-alpha-mannosidase IA OS=Mus musculus GN=Man1a1 PE=1 SV=1	MA1A1_MOUSE	Man1a1 Man1a	30	30	28	21	30	20	12	18	21	12	9	10	33	24	21	19	30	18	10	15	14	14	13	13	0.3494	-0.566	0.91195	0.031323	0.508	0.963415	0.128944	-0.178
Q8C165	Probable carboxypeptidase PM20D1 OS=Mus musculus GN=Pm20d1 PE=2 SV=1	P20D1_MOUSE	Pm20d1	8	5	5	3	10	6	3	3	5	2	1	0	8	8	5	4	6	4	2	7	3	1	2	2	0.00690226	0	0.945946	0.206128	0.627	1.21429	0.0459961	0
P97464	Exostosin-1 OS=Mus musculus GN=Ext1 PE=1 SV=1	EXT1_MOUSE	Ext1	4	7	4	5	2	4	0	2	1	0	0	0	6	3	3	4	3	3	0	1	0	1	0	1	0.175222	-0.581	0.846154	0.0260693	0.185	1	0.110743	-0.278
P34928	Apolipoprotein C-I OS=Mus musculus GN=Apoc1 PE=1 SV=1	APOC1_MOUSE	Apoc1	19	21	25	26	29	20	81	81	77	112	136	136	15	33	20	23	36	26	45	93	50	128	131	136	0.898102	0.773	1.09286	0.733869	-0.234	0.935795	0.0642825	-0.053
Q9R098	Hepatocyte growth factor activator OS=Mus musculus GN=Hgfac PE=1 SV=1	HGFA_MOUSE	Hgfac	61	44	40	25	45	41	81	94	104	89	73	75	38	27	38	35	51	44	60	104	88	91	78	90	0.889729	-0.519	0.910156	0.325936	0.927	0.99031	0.0132825	-0.063
P34902	Cytokine receptor common subunit gamma OS=Mus musculus GN=Il2rg PE=2 SV=1	IL2RG_MOUSE	Il2rg	8	5	3	4	5	4	4	3	4	1	1	1	6	3	6	3	6	6	1	3	4	1	1	2	0.00202392	0	1.03448	0.00656209	-0.309	0.857143	0.000301888	-0.06
P15379	Isoform 5 of CD44 antigen OS=Mus musculus GN=Cd44	CD44_MOUSE	Cd44 Ly-24	4	6	2	0	3	2	10	10	13	8	8	11	3	3	2	5	4	4	5	10	10	7	8	9	0.531702	0.78	1.23529	0.48885	-1.464	0.816667	0.00495637	-0.127
O88342	WD repeat-containing protein 1 OS=Mus musculus GN=Wdr1 PE=1 SV=3	WDR1_MOUSE	Wdr1	4	4	5	8	4	3	2	2	4	1	2	1	11	2	3	6	5	4	1	1	1	2	3	0	0.099107	0	1.10714	0.123273	-0.737	0.666667	3.77585e-05	0
P10923	Osteopontin OS=Mus musculus GN=Spp1 PE=1 SV=1	OSTP_MOUSE	Spp1 Eta-1 Op Spp-1	1	1	0	2	1	0	1	0	0	0	0	1	1	1	1	0	0	0	2	0	0	0	0	0	0.141312	-0.664	0.6	0.025393	0.137	1	0.0391079	-0.413
Q9Z0T9	Integrin beta-6 OS=Mus musculus GN=Itgb6 PE=2 SV=1	ITB6_MOUSE	Itgb6	0	1	1	1	1	1	0	1	0	0	0	1	1	0	1	1	0	2	0	0	0	0	0	0	0.00970783	0	1	0.0634531	-0.946	0	0.000525953	-0.269
Q9R171	Cerebellin-1 OS=Mus musculus GN=Cbln1 PE=1 SV=1	CBLN1_MOUSE	Cbln1	0	0	0	0	0	0	0	2	4	0	0	1	0	0	0	0	0	0	0	3	0	1	1	0	0.166667	0	#DIV/0!	9.83001e-05	-0.244	0.714286	7.06877e-05	-0.224
Q03311	Cholinesterase OS=Mus musculus GN=Bche PE=2 SV=2	CHLE_MOUSE	Bche	22	21	25	16	19	8	30	40	36	23	13	18	28	21	17	10	21	15	17	35	30	23	21	15	0.0308899	0	1.00901	0.197767	-0.392	0.88125	0.0216479	-0.141
P09411	Phosphoglycerate kinase 1 OS=Mus musculus GN=Pgk1 PE=1 SV=4	PGK1_MOUSE	Pgk1 Pgk-1	1	3	0	5	1	1	3	5	4	5	2	3	8	1	2	3	0	2	4	3	5	1	0	0	0.670241	0.554	1.45455	0.773599	-1.02	0.590909	0.00920421	0
P99026	Proteasome subunit beta type-4 OS=Mus musculus GN=Psmb4 PE=1 SV=1	PSB4_MOUSE	Psmb4 Lmp3	5	5	8	1	3	5	3	1	2	1	0	0	6	4	4	1	5	5	2	3	2	1	0	0	0.00938376	-0.209	0.925926	0.00404333	0.276	1.14286	0.00287702	0
P63017	Heat shock cognate 71 kDa protein OS=Mus musculus GN=Hspa8 PE=1 SV=1	HSP7C_MOUSE	Hspa8 Hsc70 Hsc73	25	23	25	15	20	19	13	15	16	6	5	4	31	23	29	13	18	11	14	14	16	7	2	2	0.00901535	0	0.984252	0.00946821	0.105	0.932203	0.0326354	0
P70428	Exostosin-2 OS=Mus musculus GN=Ext2 PE=1 SV=2	EXT2_MOUSE	Ext2	5	4	6	3	3	2	2	4	2	0	0	1	3	6	4	6	3	2	1	3	2	0	1	0	0.079629	0	1.04348	0.00124714	-0.271	0.777778	0.0141878	0
Q06806	Tyrosine-protein kinase receptor Tie-1 OS=Mus musculus GN=Tie1 PE=2 SV=3	TIE1_MOUSE	Tie1 Tie Tie-1	2	1	0	1	1	2	0	0	1	0	0	0	0	0	2	1	0	2	0	0	0	0	1	0	0.0826526	-0.51	0.714286	0.0775852	0.124	1	0.0411452	-0.379
Q1ERP8	Isoform 5 of CMRF35-like molecule 9 OS=Mus musculus GN=Cd300lg	CLM9_MOUSE	Cd300lg Clm9 D11Ertd736e	3	1	1	1	1	1	0	0	0	0	0	0	2	2	0	1	1	0	0	0	0	0	0	0	0.0912889	-0.516	0.75	0.166667	0	#DIV/0!	0.0724382	-0.406
Q3TKT4	Isoform 2 of Transcription activator BRG1 OS=Mus musculus GN=Smarca4	SMCA4_MOUSE	Smarca4 Baf190a Brg1 Snf2b Snf2l4	1	1	1	0	2	3	0	0	0	0	0	0	1	2	2	0	1	0	0	0	0	0	0	0	0.0327832	-0.388	0.75	0.166667	0	#DIV/0!	0.025768	-0.314
Q8CIT9	Isoform 3 of Suprabasin OS=Mus musculus GN=Sbsn	SBSN_MOUSE	Sbsn	1	1	1	0	3	2	0	0	0	0	0	0	0	0	3	2	1	0	0	0	0	0	0	0	0.000262805	-0.199	0.75	0.166667	0	#DIV/0!	0.000206741	-0.169
Q8R2Y2	Isoform 2 of Cell surface glycoprotein MUC18 OS=Mus musculus GN=Mcam	MUC18_MOUSE	Mcam Muc18	6	3	2	1	2	2	1	1	1	1	0	1	1	1	3	3	2	2	1	0	3	0	1	1	0.306644	-0.586	0.75	0.0032921	0.399	1.2	0.0925022	-0.344
P24270	Catalase OS=Mus musculus GN=Cat PE=1 SV=4	CATA_MOUSE	Cat Cas-1 Cas1	0	3	1	4	5	3	3	2	3	1	1	1	2	7	3	1	3	1	2	4	2	1	0	0	0.0290308	0	1.0625	0.00422358	-0.289	0.818182	0.000473037	0
P04223	Isoform 2 of H-2 class I histocompatibility antigen, K-K alpha chain OS=Mus musculus GN=H2-K1	HA1K_MOUSE	H2-K1 H2-K	4	2	0	0	1	0	3	4	2	4	4	2	3	2	0	0	0	0	2	4	7	5	0	3	0.0944436	-0.329	0.714286	0.0147845	0.303	1.10526	0.00234481	-0.063
Q9R182	Angiopoietin-related protein 3 OS=Mus musculus GN=Angptl3 PE=2 SV=1	ANGL3_MOUSE	Angptl3	11	6	6	5	5	4	4	6	5	2	3	2	7	7	5	2	7	6	1	6	2	3	5	6	0.144807	-0.401	0.918919	0.0164518	0.318	1.04545	0.0226746	-0.175
P14847	C-reactive protein OS=Mus musculus GN=Crp PE=2 SV=2	CRP_MOUSE	Crp Ptx1	22	21	24	29	28	19	11	15	12	5	5	7	20	16	22	21	27	26	12	15	10	4	10	8	0.276786	-0.509	0.923077	0.527904	0.667	1.07273	0.00238656	0
Q9EQH2	Endoplasmic reticulum aminopeptidase 1 OS=Mus musculus GN=Erap1 PE=2 SV=2	ERAP1_MOUSE	Erap1 Appils Arts1	3	1	2	3	5	4	1	0	1	2	0	0	3	3	3	3	3	2	1	1	2	1	1	0	0.00980729	0	0.944444	0.0707596	0.708	1.5	0.00804196	0
Q99JY9	Actin-related protein 3 OS=Mus musculus GN=Actr3 PE=1 SV=3	ARP3_MOUSE	Actr3 Arp3	1	2	3	2	1	0	0	0	0	0	0	0	2	0	2	2	0	0	0	0	1	0	0	0	0.101513	-0.487	0.666667	0.00586536	0.534	#DIV/0!	0.0189833	-0.271
P01665	Ig kappa chain V-III region PC 7183 OS=Mus musculus PE=1 SV=1	KV3AD_MOUSE	0	0	8	0	0	12	10	3	3	3	0	0	0	0	4	18	5	0	4	0	0	0	4	0	0	0.560349	0	1.03333	0.472562	-0.684	0.444444	0.0806219	0
Q8CF98	Collectin-10 OS=Mus musculus GN=Colec10 PE=2 SV=1	COL10_MOUSE	Colec10 Cll1	1	2	3	1	2	1	2	1	1	1	2	2	2	1	1	1	0	1	2	2	3	3	2	2	0.256417	-1.087	0.6	0.46288	1.679	1.55556	1.58852e-05	0
Q71KU9	Fibrinogen-like protein 1 OS=Mus musculus GN=Fgl1 PE=2 SV=2	FGL1_MOUSE	Fgl1 Mfire1	3	0	2	1	1	4	2	3	3	3	1	1	6	0	2	0	0	0	2	2	3	3	1	2	0.244711	-0.398	0.727273	0.000294725	0.368	1	0.0428776	-0.281
P08228	Superoxide dismutase [Cu-Zn] OS=Mus musculus GN=Sod1 PE=1 SV=2	SODC_MOUSE	Sod1	7	2	2	4	3	3	5	8	5	5	4	5	3	2	6	1	2	0	8	6	11	4	4	4	1.33229	-0.892	0.666667	0.535423	0.867	1.15625	0.00887184	-0.151
Q9R0E2	Procollagen-lysine,2-oxoglutarate 5-dioxygenase 1 OS=Mus musculus GN=Plod1 PE=1 SV=1	PLOD1_MOUSE	Plod1 Plod	5	10	7	8	6	5	2	3	2	1	3	1	10	8	2	6	5	4	2	4	5	0	2	3	0.194272	-0.446	0.853659	0.273295	0.852	1.33333	0.00149409	-0.076
P58252	Elongation factor 2 OS=Mus musculus GN=Eef2 PE=1 SV=2	EF2_MOUSE	Eef2	1	1	2	2	1	3	2	1	1	1	1	1	3	1	3	1	0	1	3	1	2	1	1	1	0.00293611	-0.136	0.9	0.118224	0.677	1.28571	0.0152181	0.301
Q62087	Serum paraoxonase/lactonase 3 OS=Mus musculus GN=Pon3 PE=1 SV=2	PON3_MOUSE	Pon3	1	2	2	0	1	3	1	2	3	1	1	1	1	1	0	1	2	1	1	2	2	2	2	2	0.232846	-0.805	0.666667	0.098989	1.28	1.22222	0.000857543	-0.182
Q3U0L2	Isoform 2 of Ankyrin repeat domain-containing protein 33B OS=Mus musculus GN=Ankrd33b	AN33B_MOUSE	Ankrd33b	0	1	0	0	1	0	2	3	2	3	3	3	0	0	0	0	1	1	1	4	2	3	3	2	0.0891745	0	1	0.00131826	-0.259	0.9375	0.00159585	-0.115
P35230	Regenerating islet-derived protein 3-beta OS=Mus musculus GN=Reg3b PE=1 SV=1	REG3B_MOUSE	Reg3b Pap Pap1	0	3	3	1	1	2	0	1	1	0	1	2	2	0	2	2	2	3	2	0	1	0	1	1	0.0282317	0	1.1	0.00276117	0.221	1	0.0643842	0.411
O88803	Isoform 2 of Leukocyte cell-derived chemotaxin-2 OS=Mus musculus GN=Lect2	LECT2_MOUSE	Lect2	3	2	0	1	2	2	2	2	0	0	0	1	4	2	2	2	0	0	2	1	1	0	1	0	0.00113437	0	1	0.0134614	0.142	1	0.00274546	0
P11499	Heat shock protein HSP 90-beta OS=Mus musculus GN=Hsp90ab1 PE=1 SV=3	HS90B_MOUSE	Hsp90ab1 Hsp84 Hsp84-1 Hspcb	5	5	5	0	0	0	0	0	0	0	0	0	7	4	0	0	2	0	0	0	0	0	1	0	0.0376453	-0.179	0.866667	0.000723373	0.571	#DIV/0!	0.0016972	-0.093
O35664-3	Isoform 3 of Interferon alpha/beta receptor 2 OS=Mus musculus GN=Ifnar2	INAR2_MOUSE	Ifnar2	19	22	23	13	16	11	28	30	31	29	24	22	19	22	16	17	21	18	20	21	27	28	19	24	0.769873	0.919	1.08654	0.637559	-1.185	0.847561	9.36456e-06	0
Q6P253	Isoform 4 of Dermokine OS=Mus musculus GN=Dmkn	DMKN_MOUSE	Dmkn	2	0	0	0	0	0	0	4	4	0	2	2	0	0	0	0	0	0	1	2	4	3	2	1	0.339878	-0.797	0	0.0281319	0.416	1.08333	0.000629661	-0.127
Q3UU96	Serine/threonine-protein kinase MRCK alpha OS=Mus musculus GN=Cdc42bpa PE=2 SV=2	MRCKA_MOUSE	Cdc42bpa Kiaa0451	4	5	8	2	5	3	1	3	5	3	3	2	0	3	3	5	9	9	0	4	2	1	3	1	0.0703077	0	1.07407	0.487566	-1.11	0.647059	0.00338391	-0.111
Q9DBD0	Inhibitor of carbonic anhydrase OS=Mus musculus GN=Ica PE=1 SV=1	ICA_MOUSE	Ica	184	197	184	169	222	168	243	370	339	304	284	293	188	193	155	177	235	186	204	316	317	294	299	265	0.80515	0.537	1.0089	0.458662	-0.691	0.924714	0.00947771	0
P18760	Cofilin-1 OS=Mus musculus GN=Cfl1 PE=1 SV=3	COF1_MOUSE	Cfl1	1	1	2	3	0	0	0	0	3	1	0	0	4	0	2	1	2	1	0	0	0	1	0	0	0.133832	0.461	1.42857	0.1144	-0.693	0.25	0.000869054	0
P97797	Isoform 2 of Tyrosine-protein phosphatase non-receptor type substrate 1 OS=Mus musculus GN=Sirpa	SHPS1_MOUSE	Sirpa Bit Myd1 Ptpns1 Shps1 Sirp	3	2	1	1	1	0	0	1	2	0	0	0	3	1	2	1	2	1	0	0	1	0	0	0	0.0449134	0	1.25	0.0103255	-0.557	0.333333	0.00103862	0
O54890	Integrin beta-3 OS=Mus musculus GN=Itgb3 PE=1 SV=2	ITB3_MOUSE	Itgb3	3	1	0	3	1	2	0	0	0	0	0	0	1	0	0	4	3	1	0	0	0	1	1	0	0.0280045	-0.25	0.9	0.0835489	0.981	#DIV/0!	0.0213725	0
Q9Z2W0	Aspartyl aminopeptidase OS=Mus musculus GN=Dnpep PE=2 SV=2	DNPEP_MOUSE	Dnpep	1	1	5	1	0	0	0	0	2	0	0	0	0	0	5	0	1	1	0	1	3	0	0	0	0.00195159	0	0.875	0.0587056	0.518	2	3.36787e-08	0
P21107	Isoform 2 of Tropomyosin alpha-3 chain OS=Mus musculus GN=Tpm3	TPM3_MOUSE	Tpm3 Tpm-5 Tpm5	1	1	2	0	0	0	0	0	0	2	2	2	3	1	2	0	0	0	1	1	0	0	2	0	0.18781	0.565	1.5	0.0348003	-0.447	0.666667	0.00027781	0
Q9WUB3	Glycogen phosphorylase, muscle form OS=Mus musculus GN=Pygm PE=1 SV=3	PYGM_MOUSE	Pygm	2	0	0	6	0	4	0	0	0	0	0	0	2	2	0	1	3	2	0	0	0	0	0	0	0.426561	-0.498	0.833333	0.166667	0	#DIV/0!	0.361915	-0.432
Q9QXZ0	Isoform 4 of Microtubule-actin cross-linking factor 1 OS=Mus musculus GN=Macf1	MACF1_MOUSE	Macf1 Acf7 Aclp7 Macf	0	1	1	1	1	2	1	3	1	1	0	0	1	1	0	1	1	1	1	1	1	1	1	0	0.000537405	-0.296	0.833333	0.0586415	-0.018	0.833333	7.17201e-05	-0.247
Q8BQM8	Echinoderm microtubule-associated protein-like 5 OS=Mus musculus GN=Eml5 PE=2 SV=2	EMAL5_MOUSE	Eml5	0	0	1	2	0	2	2	1	1	1	2	0	0	0	0	1	2	1	0	1	0	2	2	1	0.0514169	-0.431	0.8	4.14208e-05	-0.277	0.857143	0.105165	-0.558
P61982	14-3-3 protein gamma OS=Mus musculus GN=Ywhag PE=1 SV=2	1433G_MOUSE	Ywhag	2	3	4	0	0	1	0	0	0	0	0	0	3	2	2	0	0	1	1	0	0	0	0	0	0.0122819	-0.251	0.8	0.00913921	0.643	#DIV/0!	0.0134303	0
Q9R0X2	ADAM DEC1 OS=Mus musculus GN=Adamdec1 PE=2 SV=1	ADEC1_MOUSE	Adamdec1	1	1	0	1	1	1	1	1	0	1	0	1	3	0	0	2	1	1	0	0	1	1	0	1	0.122919	0.561	1.4	2.5486e-05	-0.418	0.75	0.0113243	0.309
Q8R0Z6	Angiopoietin-related protein 6 OS=Mus musculus GN=Angptl6 PE=2 SV=1	ANGL6_MOUSE	Angptl6 Agf	3	7	5	6	5	6	6	9	8	4	3	7	4	10	1	4	9	3	8	7	4	4	6	6	0.00065046	0	0.96875	0.0117349	0.24	0.945946	0.000663239	0
P02468	Laminin subunit gamma-1 OS=Mus musculus GN=Lamc1 PE=1 SV=2	LAMC1_MOUSE	Lamc1 Lamb-2 Lamc-1	2	2	0	0	0	3	0	0	1	0	0	0	5	0	1	0	1	1	0	0	1	0	0	0	0.0047134	0	1.14286	0.107586	0.058	1	0.00174254	0
P63242	Eukaryotic translation initiation factor 5A-2 OS=Mus musculus GN=Eif5a2 PE=2 SV=3	IF5A1_MOUSE	Eif5a	1	1	0	2	1	2	0	0	0	1	0	0	4	0	1	2	1	1	0	0	0	0	0	0	0.073433	0	1.28571	0.00361423	-0.547	0	0.00866671	0
Q80XD8	Proline-rich acidic protein 1 OS=Mus musculus GN=Prap1 PE=2 SV=1	PRAP1_MOUSE	Prap1 Upa	3	0	1	0	0	0	0	1	1	1	1	1	1	0	1	0	1	0	1	1	1	1	1	0	0.0433555	-0.36	0.75	0.0220753	0.207	1	0.00451336	-0.272
Q9JLB9	Isoform 3 of Nectin-3 OS=Mus musculus GN=Pvrl3	PVRL3_MOUSE	Pvrl3	3	4	0	0	1	1	0	0	0	0	0	0	3	1	0	2	1	0	1	0	0	0	0	0	0.0348866	-0.284	0.777778	0.00913921	0.643	#DIV/0!	0.00308493	-0.087
Q9JHK4	Isoform 2 of Geranylgeranyl transferase type-2 subunit alpha OS=Mus musculus GN=Rabggta	PGTA_MOUSE	Rabggta	0	0	0	0	0	0	1	1	1	2	3	1	0	0	0	0	1	0	0	2	1	2	1	1	0.00218426	0.559	#DIV/0!	0.059831	-0.633	0.777778	0.00176093	-0.265
Q8BFZ3	Beta-actin-like protein 2 OS=Mus musculus GN=Actbl2 PE=1 SV=1	ACTBL_MOUSE	Actbl2	10	0	0	0	0	0	10	10	18	7	5	5	9	5	0	0	0	0	6	8	14	8	6	4	0.180863	0	1.4	0.131902	-0.426	0.836364	4.33291e-05	0
Q8VCC2	Liver carboxylesterase 1 OS=Mus musculus GN=Ces1 PE=2 SV=1	EST1_MOUSE	Ces1 Ces1g	19	38	70	13	45	19	39	0	58	0	0	0	24	32	52	16	43	24	0	49	44	0	0	0	0.00205665	0	0.936275	0.257792	-0.106	0.958763	0.0327568	0
Q60610	T-lymphoma invasion and metastasis-inducing protein 1 OS=Mus musculus GN=Tiam1 PE=1 SV=1	TIAM1_MOUSE	Tiam1 Tiam-1	0	1	1	0	1	0	1	1	1	0	0	2	0	0	1	0	1	1	0	2	1	2	0	0	0.0437984	0	1	0.0332566	-0.089	1	0.0344408	0
Q01768	Nucleoside diphosphate kinase B OS=Mus musculus GN=Nme2 PE=1 SV=1	NDKB_MOUSE	Nme2	10	8	7	0	0	7	0	0	0	4	0	4	14	9	7	0	0	8	0	0	0	0	0	0	0.550376	0	1.1875	3.01361	-1.368	0	0.000758771	0
P70700	DNA-directed RNA polymerase I subunit RPA2 OS=Mus musculus GN=Polr1b PE=2 SV=2	RPA2_MOUSE	Polr1b Rpa2 Rpo1-2	2	2	1	1	1	1	0	0	0	0	0	0	1	0	0	2	1	2	0	0	1	0	0	0	0.0562481	-0.513	0.75	0.00586536	0.534	#DIV/0!	0.00376056	-0.24
Q6WVG3	BTB/POZ domain-containing protein KCTD12 OS=Mus musculus GN=Kctd12 PE=1 SV=1	KCD12_MOUSE	Kctd12 Pfet1	1	1	1	1	1	1	0	1	0	0	0	1	1	1	1	1	1	1	0	1	0	0	0	0	0.0315093	0	1	0.000858736	-0.447	0.5	0.00285074	-0.198
Q3V2T4-2	Isoform 2 of Keratinocyte differentiation-associated protein OS=Mus musculus GN=Krtdap	KTDAP_MOUSE	Krtdap Kdap	0	2	2	0	2	0	0	0	0	1	0	0	3	3	0	0	2	0	0	0	0	0	0	0	0.217463	0.531	1.33333	0.00361423	-0.547	0	0.0607197	0.346
Q769J6	A disintegrin and metalloproteinase with thrombospondin motifs 13 OS=Mus musculus GN=Adamts13 PE=2 SV=1	ATS13_MOUSE	Adamts13 Gm710	2	0	1	1	0	0	1	2	1	1	3	1	2	0	0	0	1	0	1	1	1	1	2	2	0.0544803	-0.44	0.75	0.0110501	-0.167	0.888889	0.0548576	-0.473
Q9R0P5	Destrin OS=Mus musculus GN=Dstn PE=1 SV=3	DEST_MOUSE	Dstn Dsn Sid23	1	1	4	1	1	1	1	0	3	0	0	0	3	0	5	1	0	0	0	0	2	0	0	0	0.000846468	0	1	0.0266678	-0.455	0.5	0.0099992	0
Q9R0P3	S-formylglutathione hydrolase OS=Mus musculus GN=Esd PE=1 SV=1	ESTD_MOUSE	Esd Es10 Sid478	1	1	1	1	1	2	0	0	0	0	0	0	3	0	3	1	0	0	0	0	0	0	0	0	0.00997254	0	1	0.166667	0	#DIV/0!	0.00791205	0
O08576	Isoform 4 of RUN domain-containing protein 3A OS=Mus musculus GN=Rundc3a	RUN3A_MOUSE	Rundc3a Rap2ip Rpip8	1	1	1	1	1	1	0	0	0	0	0	0	1	1	1	1	0	2	0	1	0	0	0	0	0.0123556	0	1	0.0068583	0.529	#DIV/0!	0.00287296	0.302
O70458	Isoform 2 of Oncostatin-M-specific receptor subunit beta OS=Mus musculus GN=Osmr	OSMR_MOUSE	Osmr Osmrb	2	0	0	0	1	0	0	1	2	0	0	1	1	0	0	0	0	1	2	1	1	0	0	0	0.00445236	-0.326	0.666667	1.06764e-06	0.285	1	0.0237222	0
P21836	Acetylcholinesterase OS=Mus musculus GN=Ache PE=1 SV=1	ACES_MOUSE	Ache	2	1	0	1	1	0	0	0	1	0	0	0	1	3	0	1	1	1	0	0	0	0	0	0	0.0951343	0.512	1.4	0.013572	-0.5	0	0.0181224	0.303
P50247	Adenosylhomocysteinase OS=Mus musculus GN=Ahcy PE=1 SV=3	SAHH_MOUSE	Ahcy	1	2	2	0	0	1	0	0	0	0	0	0	2	1	1	0	3	0	0	0	0	0	0	0	0.00476575	0	1.16667	0.166667	0	#DIV/0!	0.00368261	0
Q3UZ09	Complement C1r subcomponent-like protein OS=Mus musculus GN=C1rl PE=1 SV=1	C1RL_MOUSE	C1rl C1rlp	7	0	0	0	0	0	0	0	0	0	0	0	6	0	0	0	0	0	0	0	0	0	0	0	0.0759051	-0.183	0.857143	0.166667	0	#DIV/0!	0.0600576	-0.183
Q7TMR0	Isoform 2 of Lysosomal Pro-X carboxypeptidase OS=Mus musculus GN=Prcp	PCP_MOUSE	Prcp	3	2	0	1	1	0	0	0	0	0	0	0	1	0	0	2	1	2	0	0	0	0	0	0	0.00276809	-0.226	0.857143	0.166667	0	#DIV/0!	0.00217469	-0.194
Q8BG22	Isoform 2 of Calcium-activated chloride channel regulator 2 OS=Mus musculus GN=Clca2	CLCA2_MOUSE	Clca2 Clca5	1	2	2	1	0	0	0	0	0	0	0	0	1	1	2	2	1	0	0	0	0	0	0	0	0.0232833	0	1.16667	0.166667	0	#DIV/0!	0.018262	0.312
Q9JKR6	Hypoxia up-regulated protein 1 OS=Mus musculus GN=Hyou1 PE=1 SV=1	HYOU1_MOUSE	Hyou1 Grp170	1	0	0	1	1	2	0	1	0	0	0	0	1	2	0	1	2	1	0	0	0	0	0	0	0.0518191	0.536	1.4	0.0128422	-0.503	0	0.00375976	0
Q9EP64	Tenomodulin OS=Mus musculus GN=Tnmd PE=2 SV=1	TNMD_MOUSE	Tnmd Chm1l	0	1	0	0	1	1	0	1	1	1	1	0	0	0	0	0	1	1	0	0	1	2	0	1	0.00268509	-0.441	0.666667	0.0445455	0.09	1	0.000225985	-0.269
Q8K1B8	Fermitin family homolog 3 OS=Mus musculus GN=Fermt3 PE=1 SV=1	URP2_MOUSE	Fermt3 Kind3 Urp2	0	0	1	1	0	0	0	1	1	1	1	1	0	0	0	1	1	0	0	1	0	1	1	1	0.0756224	0	1	0.00612015	-0.333	0.8	0.00152731	-0.245
P28076	Proteasome subunit beta type-9 OS=Mus musculus GN=Psmb9 PE=1 SV=1	PSB9_MOUSE	Psmb9 Lmp2 Ring12	3	0	0	0	1	1	0	0	1	0	0	0	1	0	0	1	2	1	0	0	1	0	0	0	0.00939316	0	1	0.107586	0.058	1	0.0103092	-0.09
P49183	Deoxyribonuclease-1 OS=Mus musculus GN=Dnase1 PE=2 SV=2	DNAS1_MOUSE	Dnase1 Dnl1	0	2	1	0	1	2	0	0	0	0	0	0	0	1	1	2	2	0	0	0	0	0	0	0	0.00714759	0	1	0.166667	0	#DIV/0!	0.00548497	0
Q91V13	Liver-expressed antimicrobial peptide 2 OS=Mus musculus GN=Leap2 PE=2 SV=1	LEAP2_MOUSE	Leap2	1	2	1	1	0	0	0	0	0	0	0	0	2	0	0	0	3	1	0	0	0	0	0	0	0.0372545	0	1.2	0.166667	0	#DIV/0!	0.0280339	0
Q91VW3	SH3 domain-binding glutamic acid-rich-like protein 3 OS=Mus musculus GN=Sh3bgrl3 PE=1 SV=1	SH3L3_MOUSE	Sh3bgrl3	1	0	0	0	0	0	2	1	1	0	1	0	0	1	0	0	0	0	1	1	1	0	1	0	0.0965638	0	1	0.00646059	-0.235	0.8	0.002048	-0.209
Q99PT1	Rho GDP-dissociation inhibitor 1 OS=Mus musculus GN=Arhgdia PE=1 SV=3	GDIR1_MOUSE	Arhgdia C87222 Gdi1	1	0	0	2	1	2	0	0	0	0	0	0	3	0	0	0	0	0	1	0	1	0	0	0	0.50568	-0.737	0.5	0.138871	1.005	#DIV/0!	0.0312537	-0.321
Q9WU62	Isoform 2 of Inner centromere protein OS=Mus musculus GN=Incenp	INCE_MOUSE	Incenp	0	1	0	0	0	1	0	0	0	1	1	2	0	1	0	2	0	0	0	0	0	0	0	2	0.0617097	0.469	1.5	0.0805319	-0.581	0.5	0.0343318	0
Q61598	Isoform 2 of Rab GDP dissociation inhibitor beta OS=Mus musculus GN=Gdi2	GDIB_MOUSE	Gdi2 Gdi3	0	0	1	1	0	1	0	1	1	0	0	0	0	0	3	0	1	1	0	0	0	0	0	1	0.0750542	0.452	1.66667	0.0319478	-0.245	0.5	0.0147416	0.323
O35136	Isoform Short of Neural cell adhesion molecule 2 OS=Mus musculus GN=Ncam2	NCAM2_MOUSE	Ncam2 Ocam Rncam	0	0	0	0	1	0	0	0	2	2	1	0	0	0	0	1	1	0	0	0	0	1	1	1	0.0236103	0.591	2	0.008858	-0.452	0.6	0.0343373	0
Q6NZM9	Isoform 2 of Histone deacetylase 4 OS=Mus musculus GN=Hdac4	HDAC4_MOUSE	Hdac4	0	0	0	0	0	0	3	1	2	0	0	0	0	0	0	0	0	2	1	0	2	0	0	0	0.21678	0.772	#DIV/0!	0.1325	-0.559	0.5	0.0427376	0
P09528	Ferritin heavy chain OS=Mus musculus GN=Fth1 PE=1 SV=2	FRIH_MOUSE	Fth1 Fth	4	2	0	1	1	1	1	1	1	0	1	1	5	1	0	0	0	1	1	0	1	1	1	1	0.11925	-0.341	0.777778	0.0264325	0.174	1	0.0468245	-0.29
Q9JJN5	Carboxypeptidase N catalytic chain OS=Mus musculus GN=Cpn1 PE=2 SV=1	CBPN_MOUSE	Cpn1	73	82	54	32	53	41	81	141	138	105	71	74	70	74	44	54	69	54	63	122	108	95	76	75	2.61344	0.672	1.08955	0.699975	-0.704	0.883607	0.199072	0
P21981	Protein-glutamine gamma-glutamyltransferase 2 OS=Mus musculus GN=Tgm2 PE=1 SV=4	TGM2_MOUSE	Tgm2	0	0	1	2	0	2	0	0	0	0	0	0	1	0	2	2	0	0	0	0	0	0	0	0	0.0267924	0	1	0.166667	0	#DIV/0!	0.0203477	0
Q06194	Coagulation factor VIII OS=Mus musculus GN=F8 PE=2 SV=2	FA8_MOUSE	F8 Cf8 F8c	0	0	1	0	1	2	0	0	1	0	0	0	0	0	0	0	3	2	0	0	0	0	0	0	0.00953678	0	1.25	0.013572	-0.5	0	0.0383329	0
Q9D0F9	Phosphoglucomutase-1 OS=Mus musculus GN=Pgm1 PE=1 SV=4	PGM1_MOUSE	Pgm1 Pgm2	0	1	0	1	1	2	0	0	0	0	0	0	2	1	0	1	0	0	0	0	0	0	0	0	0.00440582	-0.179	0.8	0.166667	0	#DIV/0!	0.00325791	-0.155
O08529	Calpain-2 catalytic subunit OS=Mus musculus GN=Capn2 PE=2 SV=4	CAN2_MOUSE	Capn2	0	0	0	0	1	0	0	1	1	1	0	0	0	0	0	0	0	0	1	3	1	0	0	0	0.00196224	-0.561	0	0.106844	0.668	1.66667	0.0039885	0.354
P10852	Isoform 2 of 4F2 cell-surface antigen heavy chain OS=Mus musculus GN=Slc3a2	4F2_MOUSE	Slc3a2 Mdu1	8	6	3	4	4	2	0	3	0	1	1	1	6	5	4	3	4	1	0	3	2	0	0	2	0.20782	-0.469	0.851852	0.00121164	0.215	1.16667	0.0978509	-0.259
Q8C4A5	Isoform 2 of Putative Polycomb group protein ASXL3 OS=Mus musculus GN=Asxl3	ASXL3_MOUSE	Asxl3	0	3	0	2	1	1	3	7	9	2	2	3	0	1	1	2	2	0	0	5	6	4	6	3	0.000397049	-0.213	0.857143	0.00741746	-0.057	0.923077	0.00359804	-0.15
A6H6A4	Isoform 2 of Leucine-rich repeat and IQ domain-containing protein 4 OS=Mus musculus GN=Lrriq4	LRIQ4_MOUSE	Lrriq4	0	1	1	1	1	0	0	0	0	0	0	0	1	0	1	0	1	0	0	1	0	0	0	0	0.00123825	-0.403	0.75	0.0068583	0.529	#DIV/0!	0.0208087	-0.104
P24527	Leukotriene A-4 hydrolase OS=Mus musculus GN=Lta4h PE=1 SV=4	LKHA4_MOUSE	Lta4h	0	0	1	1	1	1	0	0	0	0	0	0	3	0	1	0	0	0	0	0	0	0	0	0	0.0335423	0	1	0.166667	0	#DIV/0!	0.0241371	0
P11477	Alpha-defensin 17 (Fragment) OS=Mus musculus GN=Defa17 PE=2 SV=1	DEFA1_MOUSE	Defa1 Defcr Defcr1	0	0	0	0	0	0	0	1	0	1	1	1	0	0	0	0	2	0	0	0	0	1	1	0	0.0734802	0.717	#DIV/0!	0.0453191	-0.741	0.5	0.0484614	0
Q64345	Interferon-induced protein with tetratricopeptide repeats 3 OS=Mus musculus GN=Ifit3 PE=2 SV=1	IFIT3_MOUSE	Ifit3 Garg49 Ifi49 Isg49	0	0	0	0	0	0	0	0	0	1	2	1	0	0	1	0	0	0	0	0	1	0	1	1	0.00753942	0.641	#DIV/0!	0.00181039	-0.386	0.75	0.0426822	0
Q9Z2U1	Proteasome subunit alpha type-5 OS=Mus musculus GN=Psma5 PE=1 SV=1	PSA5_MOUSE	Psma5	7	8	7	8	8	6	4	6	7	4	3	4	5	10	4	7	7	9	5	6	5	4	3	2	0.000693105	0	0.954545	0.00595049	-0.091	0.892857	0.000171731	-0.074
O88322	Nidogen-2 OS=Mus musculus GN=Nid2 PE=1 SV=2	NID2_MOUSE	Nid2	1	2	0	0	0	0	0	0	0	0	0	1	2	0	0	0	1	0	0	0	0	0	0	0	0.0375732	0	1	8.22406e-06	-0.587	0	0.00444417	-0.304
P02469	Laminin subunit beta-1 OS=Mus musculus GN=Lamb1 PE=1 SV=3	LAMB1_MOUSE	Lamb1 Lamb-1 Lamb1-1	1	0	2	0	1	0	0	0	0	0	0	0	1	0	0	0	0	1	0	1	0	0	0	0	0.0657125	-0.581	0.5	0.0068583	0.529	#DIV/0!	0.000840539	-0.311
P12815	Isoform 2 of Programmed cell death protein 6 OS=Mus musculus GN=Pdcd6	PDCD6_MOUSE	Pdcd6 Alg2	1	1	0	0	1	0	0	0	0	0	0	0	1	1	1	1	0	0	0	0	0	0	0	0	0.0468716	0.617	1.33333	0.166667	0	#DIV/0!	0.0331799	0.514
Q02596	Glycosylation-dependent cell adhesion molecule 1 OS=Mus musculus GN=Glycam1 PE=1 SV=1	GLCM1_MOUSE	Glycam1	1	1	1	0	0	0	0	0	0	0	0	0	1	1	1	0	0	0	0	0	1	0	0	0	0.0466671	0	1	0.00586536	0.534	#DIV/0!	1.17055e-05	0.299
Q8BSS9	Liprin-alpha-2 OS=Mus musculus GN=Ppfia2 PE=1 SV=2	LIPA2_MOUSE	Ppfia2	1	0	0	0	0	0	0	0	2	0	0	0	1	1	0	0	0	0	0	1	0	0	0	1	0.00134861	0	2	0.0525987	0.125	1	0.00945924	0.43
Q8CHP8	Phosphoglycolate phosphatase OS=Mus musculus GN=Pgp PE=1 SV=1	PGP_MOUSE	Pgp	1	1	1	0	0	0	0	0	0	0	0	0	1	0	2	0	0	0	0	0	1	0	0	0	0.0517608	0	1	0.00586536	0.534	#DIV/0!	3.17124e-05	0
Q8R2S8	CD177 antigen OS=Mus musculus GN=Cd177 PE=2 SV=1	CD177_MOUSE	Cd177	1	0	0	0	0	0	1	0	1	0	0	1	0	0	0	0	0	0	0	1	0	1	1	0	0.0176909	-0.663	0	0.0654487	-0.058	1	0.0133805	-0.506
Q9DBH5	Vesicular integral-membrane protein VIP36 OS=Mus musculus GN=Lman2 PE=2 SV=2	LMAN2_MOUSE	Lman2	1	0	0	0	2	0	0	0	0	0	0	0	0	0	0	1	1	2	0	0	0	0	0	0	0.0232802	0	1.33333	0.166667	0	#DIV/0!	0.0162342	0.38
Q9QZJ6	Microfibrillar-associated protein 5 OS=Mus musculus GN=Mfap5 PE=2 SV=1	MFAP5_MOUSE	Mfap5 Magp2	1	1	1	0	1	0	0	0	0	0	0	0	1	1	0	0	1	0	0	0	0	0	0	0	4.49907e-05	-0.367	0.75	0.166667	0	#DIV/0!	3.131e-05	-0.31
Q99LX0	Protein DJ-1 OS=Mus musculus GN=Park7 PE=1 SV=1	PARK7_MOUSE	Park7	0	0	0	2	1	0	0	0	0	0	0	0	1	0	1	1	0	0	1	0	0	0	0	0	0.0501281	0	1	0.00913921	0.643	#DIV/0!	0.00886685	0.329
O08602	Retinoic acid early-inducible protein 1-delta OS=Mus musculus GN=Raet1d PE=1 SV=1	RAE1A_MOUSE	Raet1a	0	0	0	0	0	0	2	1	0	0	0	0	0	0	0	0	0	0	1	2	0	1	0	0	0.166667	0	#DIV/0!	0.00054262	0.27	1.33333	0.000366555	0
Q61826	Isoform 2 of Mucosal addressin cell adhesion molecule 1 OS=Mus musculus GN=Madcam1	MADCA_MOUSE	Madcam1	0	0	0	0	0	0	1	1	0	0	1	1	0	0	0	0	0	0	0	0	0	1	1	1	0.166667	0	#DIV/0!	3.56856e-06	-0.411	0.75	2.40806e-06	-0.349
Q8VCT3	Aminopeptidase B OS=Mus musculus GN=Rnpep PE=2 SV=2	AMPB_MOUSE	Rnpep	0	0	0	0	0	0	1	0	1	1	0	1	0	0	0	0	0	0	1	1	0	0	0	1	0.166667	0	#DIV/0!	0.0120551	-0.244	0.75	0.00815304	-0.21
Q9CQ60	6-phosphogluconolactonase OS=Mus musculus GN=Pgls PE=2 SV=1	6PGL_MOUSE	Pgls	0	0	0	0	0	0	0	1	1	2	0	0	0	0	0	0	0	0	1	1	0	1	0	0	0.166667	0	#DIV/0!	0.0573309	-0.06	0.75	0.038232	-0.055
P14431	H-2 class I histocompatibility antigen, Q9 alpha chain (Fragment) OS=Mus musculus GN=H2-Q9 PE=3 SV=1	HA19_MOUSE	H2-Q9	0	0	0	0	0	0	0	0	3	0	0	0	0	0	0	4	0	0	0	0	0	0	0	0	2.01314	0.895	#DIV/0!	0.148233	-0.75	0	0.391569	0.546
Q61194	Isoform 2 of Phosphatidylinositol 4-phosphate 3-kinase C2 domain-containing subunit alpha OS=Mus musculus GN=Pik3c2a	P3C2A_MOUSE	Pik3c2a Cpk	0	0	0	0	0	0	0	0	0	3	0	0	0	0	0	0	0	0	0	0	0	3	0	1	0.166667	0	#DIV/0!	6.4533e-05	0.237	1.33333	4.31223e-05	0
P97313	DNA-dependent protein kinase catalytic subunit OS=Mus musculus GN=Prkdc PE=1 SV=3	PRKDC_MOUSE	Prkdc Xrcc7	1	0	0	1	0	1	0	0	0	0	0	0	0	0	0	0	0	0	0	1	0	2	0	0	0.90735	-1.61	0	0.278105	1.027	#DIV/0!	0.012066	-0.42
Q60976	Jerky protein OS=Mus musculus GN=Jrk PE=2 SV=2	JERKY_MOUSE	Jrk	2	1	0	0	0	0	0	0	0	0	0	0	0	1	2	0	0	0	0	0	0	0	0	0	0.0605539	0	1	0.166667	0	#DIV/0!	0.0419937	0
Q69ZX6	MORC family CW-type zinc finger protein 2A OS=Mus musculus GN=Morc2a PE=1 SV=2	MOR2A_MOUSE	Morc2a Kiaa0852 Zcwcc1	1	0	0	0	0	0	1	0	1	0	0	0	0	0	0	0	0	1	0	0	0	1	0	1	0.0771982	0	1	0.092536	0.026	1	0.0420937	0
Q91ZJ9	Isoform 2 of Hyaluronidase-1 OS=Mus musculus GN=Hyal1	HYAL1_MOUSE	Hyal1	1	0	0	0	0	1	0	0	0	1	0	0	0	0	0	0	0	0	1	0	0	1	0	1	0.293749	-1.11	0	0.148881	0.948	3	0.021175	-0.119
Q9QZZ6	Dermatopontin OS=Mus musculus GN=Dpt PE=2 SV=1	DERM_MOUSE	Dpt	0	1	1	1	0	0	0	0	0	0	0	0	0	0	0	1	1	1	0	0	0	0	0	0	0.0709525	0	1	0.166667	0	#DIV/0!	0.0486438	0
A2ASS6-2	Titin OS=Mus musculus GN=Ttn PE=1 SV=1	TITIN_MOUSE	Ttn	0	0	1	0	1	1	0	0	0	0	0	0	0	1	0	1	0	0	0	0	0	0	1	0	0.0318378	-0.131	0.666667	0.000723373	0.571	#DIV/0!	0.0110457	0
P62242	40S ribosomal protein S8 OS=Mus musculus GN=Rps8 PE=1 SV=2	RS8_MOUSE	Rps8	0	0	0	3	0	0	0	0	0	0	0	0	0	0	0	3	0	0	0	0	0	0	0	0	0.0501245	0	1	0.166667	0	#DIV/0!	0.0355943	0
O88379	Bromodomain adjacent to zinc finger domain protein 1A OS=Mus musculus GN=Baz1a PE=1 SV=3	BAZ1A_MOUSE	Baz1a Cbp146	0	0	0	0	0	0	2	1	0	0	0	0	0	0	1	0	0	0	0	0	2	0	0	0	0.00753942	0.641	#DIV/0!	0.00334325	-0.359	0.666667	0.0515222	0
Q61771	Kinesin-like protein KIF3B OS=Mus musculus GN=Kif3b PE=1 SV=1	KIF3B_MOUSE	Kif3b	0	0	0	0	0	0	0	0	1	0	2	0	0	0	1	0	0	0	0	1	1	0	0	0	0.00753942	0.641	#DIV/0!	0.000610885	-0.373	0.666667	0.0409012	0
Q61247	Alpha-2-antiplasmin OS=Mus musculus GN=Serpinf2 PE=1 SV=1	A2AP_MOUSE	Serpinf2 Pli	128	142	124	65	133	109	175	237	244	180	138	137	122	120	108	68	138	120	137	236	236	156	147	137	0.0315052	0	0.964337	0.00181422	0.034	0.944194	0.00517104	0
O88632	Isoform A of Semaphorin-3F OS=Mus musculus GN=Sema3f	SEM3F_MOUSE	Sema3f	1	1	0	0	0	1	0	0	0	0	0	0	1	1	0	0	0	0	0	0	0	0	0	0	0.00415614	-0.411	0.666667	0.166667	0	#DIV/0!	0.00278425	-0.376
P50428	Arylsulfatase A OS=Mus musculus GN=Arsa PE=2 SV=2	ARSA_MOUSE	Arsa As2	1	0	1	1	0	0	0	0	0	0	0	0	0	0	1	1	0	0	0	0	0	0	0	0	0.000817223	-0.351	0.666667	0.166667	0	#DIV/0!	0.000552389	-0.322
P55850	Isoform 3B of Desmocollin-3 OS=Mus musculus GN=Dsc3	DSC3_MOUSE	Dsc3	2	0	0	1	0	0	0	0	0	0	0	0	0	1	0	0	1	0	0	0	0	0	0	0	0.0807129	-0.522	0.666667	0.166667	0	#DIV/0!	0.0542485	-0.499
Q4PZA2	Isoform D of Endothelin-converting enzyme 1 OS=Mus musculus GN=Ece1	ECE1_MOUSE	Ece1	1	1	0	0	0	0	0	0	0	0	0	1	1	0	0	0	0	0	0	0	0	1	0	0	0.00761748	-0.476	0.5	0.0997446	-0.056	1	0.0084668	-0.459
Q5SX39	Myosin-4 OS=Mus musculus GN=Myh4 PE=1 SV=1	MYH4_MOUSE	Myh4	1	0	0	0	0	0	0	0	1	0	0	1	0	0	0	0	0	0	0	2	0	0	0	0	0.0176909	-0.663	0	0.0831944	-0.047	1	0.0140463	-0.496
Q8R4B8	Isoform 4 of NACHT, LRR and PYD domains-containing protein 3 OS=Mus musculus GN=Nlrp3	NLRP3_MOUSE	Nlrp3 Cias1 Mmig1 Nalp3 Pypaf1	1	0	0	0	1	1	0	0	0	0	0	0	0	0	0	0	2	0	0	0	0	0	0	0	0.0458216	-0.56	0.666667	0.166667	0	#DIV/0!	0.0298624	-0.529
Q8R4V5	Isoform 2 of Oncoprotein-induced transcript 3 protein OS=Mus musculus GN=Oit3	OIT3_MOUSE	Oit3 Lzp	1	0	0	0	0	1	0	0	0	0	0	1	2	0	0	0	0	0	0	0	0	0	0	0	0.0605373	0	1	8.22406e-06	-0.587	0	0.00173537	-0.313
Q9CPU0	Lactoylglutathione lyase OS=Mus musculus GN=Glo1 PE=1 SV=3	LGUL_MOUSE	Glo1	1	0	0	2	0	0	0	0	0	0	0	0	2	0	0	0	0	0	0	0	0	0	0	0	0.0518575	-0.405	0.666667	0.166667	0	#DIV/0!	0.0351446	-0.395
P23492	Purine nucleoside phosphorylase OS=Mus musculus GN=Pnp PE=1 SV=2	PNPH_MOUSE	Pnp Np Pnp1	0	1	0	1	0	0	0	0	0	0	0	0	1	0	1	1	0	0	0	0	0	0	0	0	0.0110059	0	1.5	0.166667	0	#DIV/0!	0.00742627	0.405
Q6P8U6	Pancreatic triacylglycerol lipase OS=Mus musculus GN=Pnlip PE=1 SV=1	LIPP_MOUSE	Pnlip	0	2	1	0	0	0	0	0	0	0	0	0	0	0	0	1	0	1	0	0	0	0	0	0	0.0134152	-0.171	0.666667	0.166667	0	#DIV/0!	0.0089165	-0.164
Q9CQ01	Ribonuclease T2 OS=Mus musculus GN=Rnaset2 PE=2 SV=1	RNT2_MOUSE	Rnaset2 Rnase6pl	0	1	1	1	0	0	0	0	0	0	0	0	0	0	0	0	1	1	0	0	0	0	0	0	0.0223872	-0.542	0.666667	0.166667	0	#DIV/0!	0.0147594	-0.496
Q9CRB6	Tubulin polymerization-promoting protein family member 3 OS=Mus musculus GN=Tppp3 PE=1 SV=1	TPPP3_MOUSE	Tppp3	0	2	1	0	0	0	0	0	0	0	0	0	0	0	0	0	0	0	0	0	1	0	1	0	0.545743	-1.102	0	0.0688468	0.963	#DIV/0!	0.0157376	-0.455
A6H6E2	Isoform 2 of Multimerin-2 OS=Mus musculus GN=Mmrn2	MMRN2_MOUSE	Mmrn2	0	0	1	1	0	0	0	0	0	0	0	0	0	1	1	0	0	1	0	0	0	0	0	0	0.00447462	0	1.5	0.166667	0	#DIV/0!	0.00299354	0.379
P00683	Ribonuclease pancreatic OS=Mus musculus GN=Rnase1 PE=1 SV=2	RNAS1_MOUSE	Rnase1 Rib-1 Rib1 Rns1	0	0	1	1	0	0	0	0	0	0	0	0	0	0	0	0	2	1	0	0	0	0	0	0	0.0237459	0	1.5	0.166667	0	#DIV/0!	0.0155456	0
P48036	Annexin A5 OS=Mus musculus GN=Anxa5 PE=1 SV=1	ANXA5_MOUSE	Anxa5 Anx5	0	0	1	0	0	1	0	0	0	0	0	0	1	1	0	0	0	0	0	0	1	0	0	0	0.0556384	0	1	0.00586536	0.534	#DIV/0!	4.41748e-05	0.34
Q62179	Semaphorin-4B OS=Mus musculus GN=Sema4b PE=1 SV=2	SEM4B_MOUSE	Sema4b Kiaa1745 Semac SemC	0	0	1	0	0	0	1	0	1	0	0	0	0	0	0	0	0	1	0	0	1	0	0	0	0.0878733	0	1	0.000444411	-0.45	0.5	0.00271343	-0.292
Q6A078	Centrosomal protein of 290 kDa OS=Mus musculus GN=Cep290 PE=1 SV=2	CE290_MOUSE	Cep290 Kiaa0373 Nphp6	0	0	1	0	0	0	0	0	1	0	0	0	1	0	0	0	0	0	0	0	0	2	0	0	0.0815666	0	1	0.000403931	0.409	2	0.00343808	0.406
Q8CJ27	Abnormal spindle-like microcephaly-associated protein homolog OS=Mus musculus GN=Aspm PE=2 SV=2	ASPM_MOUSE	Aspm Calmbp1 Sha1	0	0	1	0	1	1	0	0	0	0	0	0	0	1	0	0	1	0	0	0	0	0	0	0	3.25064e-05	-0.365	0.666667	0.166667	0	#DIV/0!	2.12219e-05	-0.336
Q8R2K1	Isoform 5 of Fucose mutarotase OS=Mus musculus GN=Fuom	FUCM_MOUSE	Fuom Le51	0	0	1	0	0	0	0	0	1	0	0	0	1	0	0	0	0	1	0	1	0	0	0	0	0.0133017	0.54	2	0.111689	0.049	1	0.0114355	0.522
Q91V92	ATP-citrate synthase OS=Mus musculus GN=Acly PE=1 SV=1	ACLY_MOUSE	Acly	0	0	1	0	0	0	0	0	1	0	0	0	1	0	1	0	0	0	0	0	1	0	0	0	0.0181728	0.557	2	0.107586	0.058	1	0.0157248	0.543
Q9EPU5	Tumor necrosis factor receptor superfamily member 21 OS=Mus musculus GN=Tnfrsf21 PE=1 SV=2	TNR21_MOUSE	Tnfrsf21 Dr6	0	0	0	1	0	1	0	0	0	0	0	0	0	0	0	0	1	0	2	0	0	0	0	0	0.0631967	-0.685	0.5	0.269578	0.783	#DIV/0!	0.00377516	0
Q9JIZ0	Probable N-acetyltransferase CML1 OS=Mus musculus GN=Cml1 PE=2 SV=1	CMLO1_MOUSE	Cml1	0	0	0	1	1	0	0	0	0	0	0	0	2	0	0	0	0	1	0	0	0	0	0	0	0.00598659	0	1.5	0.166667	0	#DIV/0!	0.00397839	0.339
Q9DAI9	MORN repeat-containing protein 5 OS=Mus musculus GN=Morn5 PE=2 SV=1	MORN5_MOUSE	Morn5	0	0	0	0	1	0	0	1	1	0	0	0	0	0	0	0	1	0	0	0	0	1	0	0	0.127217	0	1	0.0270607	-0.27	0.5	0.013599	-0.223
E9PZM4	Chromodomain-helicase-DNA-binding protein 2 OS=Mus musculus GN=Chd2 PE=1 SV=1	CHD2_MOUSE	Chd2	0	0	0	0	0	0	1	0	1	0	0	0	0	0	0	1	0	0	1	0	0	1	0	0	0.0299725	0.681	#DIV/0!	0.036783	0.16	1	0.0436908	0.628
P97479	Isoform 2 of Unconventional myosin-VIIa OS=Mus musculus GN=Myo7a	MYO7A_MOUSE	Myo7a Myo7	0	0	0	0	0	0	1	0	0	1	0	0	0	0	0	0	0	0	1	0	1	1	0	0	0.166667	0	#DIV/0!	0.000263099	0.418	1.5	0.000169242	0.386
Q9CZ52	Isoform 2 of Anthrax toxin receptor 1 OS=Mus musculus GN=Antxr1	ANTR1_MOUSE	Antxr1 Atr Tem8	0	0	0	0	0	0	1	2	0	0	0	0	0	1	0	0	0	0	0	1	0	0	0	0	0.0103208	0.648	#DIV/0!	0.048444	-0.678	0.333333	0.0221706	-0.136
Q9WUH7	Semaphorin-4G OS=Mus musculus GN=Sema4g PE=1 SV=1	SEM4G_MOUSE	Sema4g	0	0	0	0	0	0	2	1	0	0	0	0	0	0	0	0	0	0	0	1	1	0	0	0	0.166667	0	#DIV/0!	0.00394768	-0.402	0.666667	0.00250089	-0.39
Q8K183	Pyridoxal kinase OS=Mus musculus GN=Pdxk PE=1 SV=1	PDXK_MOUSE	Pdxk Pkh	0	0	0	0	0	0	0	1	1	0	1	0	0	0	0	0	0	0	1	0	1	0	0	0	0.166667	0	#DIV/0!	0.0430023	-0.135	0.666667	0.0273132	-0.455
P19001	Keratin, type I cytoskeletal 19 OS=Mus musculus GN=Krt19 PE=1 SV=1	K1C19_MOUSE	Krt19 Krt1-19	0	0	0	0	0	0	0	0	3	0	0	0	0	0	0	0	0	0	2	0	0	0	0	0	0.166667	0	#DIV/0!	0.0317444	0.106	0.666667	0.0202778	0
Q922X9	Protein arginine N-methyltransferase 7 OS=Mus musculus GN=Prmt7 PE=1 SV=1	ANM7_MOUSE	Prmt7 Kiaa1933	0	0	0	0	0	0	0	0	1	1	0	0	0	0	0	0	0	0	0	1	1	0	0	1	0.166667	0	#DIV/0!	0.000128213	0.44	1.5	8.02723e-05	0.406
O09107	Insulin-like 3 OS=Mus musculus GN=Insl3 PE=2 SV=2	INSL3_MOUSE	Insl3 Rlf	0	0	0	0	0	0	0	0	0	1	1	1	0	0	0	0	0	0	0	0	0	1	1	0	0.166667	0	#DIV/0!	9.60105e-06	-0.42	0.666667	6.1361e-06	-0.386
O70165	Ficolin-1 OS=Mus musculus GN=Fcn1 PE=1 SV=1	FCN1_MOUSE	Fcn1 Fcna	21	34	27	23	37	20	8	19	27	21	14	13	29	23	18	25	38	34	11	16	19	11	16	12	0.335086	0.623	1.03086	0.274519	-0.685	0.833333	0.023183	0
P14069	Protein S100-A6 OS=Mus musculus GN=S100a6 PE=1 SV=3	S10A6_MOUSE	S100a6 Cacy	1	0	0	0	0	0	1	0	0	0	0	0	1	0	0	0	0	0	0	0	0	1	0	0	0.0826344	0	1	0.088738	-0.079	1	0.0280101	-0.112
P62827	GTP-binding nuclear protein Ran OS=Mus musculus GN=Ran PE=1 SV=3	RAN_MOUSE	Ran Rasl2-8	1	0	0	1	0	0	0	0	0	0	0	0	1	0	1	0	0	0	0	0	0	0	0	0	0.0374925	0	1	0.166667	0	#DIV/0!	0.0244308	-0.11
Q8VCQ6	Phosphatidylcholine:ceramide cholinephosphotransferase 1 OS=Mus musculus GN=Sgms1 PE=1 SV=2	SMS1_MOUSE	Sgms1 Tmem23	1	0	0	0	0	1	0	0	0	0	0	0	0	0	0	0	1	1	0	0	0	0	0	0	0.020029	-0.193	1	0.166667	0	#DIV/0!	0.0128062	-0.183
Q9QZF2	Glypican-1 OS=Mus musculus GN=Gpc1 PE=1 SV=1	GPC1_MOUSE	Gpc1	1	0	0	0	0	1	0	0	0	0	0	0	0	0	0	1	0	0	0	0	0	0	1	0	0.00131573	-0.385	0.5	0.000723373	0.571	#DIV/0!	0.039011	-0.06
P97857	A disintegrin and metalloproteinase with thrombospondin motifs 1 OS=Mus musculus GN=Adamts1 PE=1 SV=4	ATS1_MOUSE	Adamts1	0	1	0	0	0	0	1	0	0	0	0	0	0	0	0	0	0	1	0	0	0	0	1	0	0.106686	0	1	0.0991701	-0.053	1	0.0553868	0
Q9JM76	Actin-related protein 2/3 complex subunit 3 OS=Mus musculus GN=Arpc3 PE=1 SV=3	ARPC3_MOUSE	Arpc3	0	1	1	0	0	0	0	0	0	0	0	0	1	0	1	0	0	0	0	0	0	0	0	0	0.0461117	0	1	0.166667	0	#DIV/0!	0.0294139	0
Q9QX47	Isoform 4 of Protein SON OS=Mus musculus GN=Son	SON_MOUSE	Son Nrebp	0	1	0	1	0	0	0	0	0	0	0	0	1	1	0	0	0	0	0	0	0	0	0	0	0.0797622	0	1	0.166667	0	#DIV/0!	0.0516352	0
Q9R0E1	Procollagen-lysine,2-oxoglutarate 5-dioxygenase 3 OS=Mus musculus GN=Plod3 PE=1 SV=1	PLOD3_MOUSE	Plod3	0	1	0	0	0	1	0	0	0	0	0	0	0	1	0	1	0	0	0	0	0	0	0	0	0.0317023	0	1	0.166667	0	#DIV/0!	0.0205705	0
P35951	Low-density lipoprotein receptor OS=Mus musculus GN=Ldlr PE=1 SV=2	LDLR_MOUSE	Ldlr	0	0	1	1	0	0	0	0	0	0	0	0	0	0	0	1	0	0	0	0	1	0	0	0	6.91912e-05	-0.342	0.5	0.00586536	0.534	#DIV/0!	0.0408523	-0.057
P97494	Glutamate--cysteine ligase catalytic subunit OS=Mus musculus GN=Gclc PE=2 SV=4	GSH1_MOUSE	Gclc Glclc	0	0	1	0	0	0	0	0	0	0	1	0	2	0	0	0	0	0	0	0	0	0	0	0	0.0155689	0	2	4.33116e-05	-0.585	0	0.0219076	0
Q62504	Isoform 3 of Msx2-interacting protein OS=Mus musculus GN=Spen	MINT_MOUSE	Spen Kiaa0929 Mint Sharp	0	0	1	0	0	0	0	0	1	0	0	0	0	0	0	0	0	0	0	1	1	0	0	0	6.29554e-05	-0.596	0	0.00156635	0.461	2	0.0488986	-0.059
Q8K0P3-2	Isoform 2 of TLD domain-containing protein 1 OS=Mus musculus GN=Tldc1	TLDC1_MOUSE	Tldc1 Kiaa1609	0	0	1	0	1	0	0	0	0	0	0	0	0	0	0	0	2	0	0	0	0	0	0	0	0.0748076	0	1	0.166667	0	#DIV/0!	0.0461451	-0.052
Q8VDD5	Myosin-9 OS=Mus musculus GN=Myh9 PE=1 SV=4	MYH9_MOUSE	Myh9	0	0	2	0	0	0	0	0	0	0	0	0	1	0	0	0	0	0	0	0	0	1	0	0	0.00276921	-0.274	0.5	0.00214747	0.557	#DIV/0!	0.0573458	0
Q9Z1D8	Zinc finger protein with KRAB and SCAN domains 5 OS=Mus musculus GN=Zkscan5 PE=2 SV=2	ZKSC5_MOUSE	Zkscan5 Zfp95	0	0	1	0	1	0	0	0	0	0	0	0	0	1	0	0	1	0	0	0	0	0	0	0	0.0564395	0	1	0.166667	0	#DIV/0!	0.0353488	0
P29268	Connective tissue growth factor OS=Mus musculus GN=Ctgf PE=2 SV=3	CTGF_MOUSE	Ctgf Ccn2 Fisp-12 Fisp12 Hcs24	0	0	0	1	0	0	0	1	0	0	0	0	0	0	0	1	0	0	0	0	1	0	0	0	0.102006	0	1	0.109404	0.053	1	0.0449778	0
Q921V5	Alpha-1,6-mannosyl-glycoprotein 2-beta-N-acetylglucosaminyltransferase OS=Mus musculus GN=Mgat2 PE=2 SV=1	MGAT2_MOUSE	Mgat2	0	0	0	1	0	1	0	0	0	0	0	0	0	0	0	1	0	1	0	0	0	0	0	0	0.0871341	0	1	0.166667	0	#DIV/0!	0.056913	0
D3KU66	Acetylserotonin O-methyltransferase OS=Mus musculus GN=Asmt PE=2 SV=1	ASMT_MOUSE	Asmt Hiomt	0	0	0	0	2	0	0	0	0	0	0	0	0	0	0	0	0	1	0	0	0	0	0	1	0.0183422	-0.212	0.5	0.000907433	0.569	#DIV/0!	0.0286671	0
P62245	40S ribosomal protein S15a OS=Mus musculus GN=Rps15a PE=1 SV=2	RS15A_MOUSE	Rps15a	0	0	0	0	2	0	0	0	0	0	0	0	0	1	0	0	0	0	1	0	0	0	0	0	0.0283669	-0.172	0.5	0.00913921	0.643	#DIV/0!	0.00341765	0
Q5SFM8	Isoform 3 of RNA-binding protein 27 OS=Mus musculus GN=Rbm27	RBM27_MOUSE	Rbm27 Kiaa1311	0	0	0	0	0	0	1	0	0	0	1	0	0	0	0	0	0	0	0	1	1	0	0	0	0.166667	0	#DIV/0!	0.0328484	-0.189	1	0.0202204	-0.18
P03940	Steroid 21-hydroxylase OS=Mus musculus GN=Cyp21 PE=2 SV=3	CP21A_MOUSE	Cyp21 Cyp21a-1 Cyp21a1	0	0	0	0	0	0	0	1	0	1	0	0	0	0	0	0	0	1	0	0	1	0	0	0	0.00414868	0.629	#DIV/0!	0.00754663	-0.381	0.5	0.0214101	0
Q0P678	Zinc finger CCCH domain-containing protein 18 OS=Mus musculus GN=Zc3h18 PE=1 SV=1	ZCH18_MOUSE	Zc3h18 Nhn1	0	0	0	0	0	0	0	1	0	0	0	1	0	1	0	0	0	0	0	0	0	1	0	0	0.0103208	0.648	#DIV/0!	0.00375722	-0.39	0.5	0.0188404	0
Q8C025-2	Isoform 2 of Cholinephosphotransferase 1 OS=Mus musculus GN=Chpt1	CHPT1_MOUSE	Chpt1 Cpt1 Dn4	0	0	0	0	0	0	0	1	1	0	0	0	0	0	0	0	0	0	1	1	0	0	0	0	0.166667	0	#DIV/0!	0.0139618	0.276	1	0.00853863	0
Q640L5	Coiled-coil domain-containing protein 18 OS=Mus musculus GN=Ccdc18 PE=2 SV=1	CCD18_MOUSE	Ccdc18	0	0	0	0	0	0	0	0	1	0	1	0	0	0	0	0	0	0	0	0	2	0	0	0	0.166667	0	#DIV/0!	0.0910867	-0.031	1	0.0553236	0
P01902	H-2 class I histocompatibility antigen, K-D alpha chain OS=Mus musculus GN=H2-K1 PE=1 SV=1	HA1D_MOUSE	H2-K1 H2-K	1	3	1	2	3	4	1	1	0	1	0	0	3	1	0	1	4	2	1	1	1	1	0	0	0.24915	-0.707	0.785714	0.00139664	0.467	1.33333	0.0689865	-0.368
P01831	Thy-1 membrane glycoprotein OS=Mus musculus GN=Thy1 PE=1 SV=1	THY1_MOUSE	Thy1 Thy-1	1	0	0	0	0	0	0	0	0	0	0	0	1	1	0	0	0	0	0	0	0	0	0	0	0.00134861	0	2	0.166667	0	#DIV/0!	0.000837675	0.391
P07978	Protamine-2 OS=Mus musculus GN=Prm2 PE=1 SV=1	PRM2_MOUSE	Prm2	1	0	0	0	0	0	0	0	0	0	0	0	1	0	0	0	0	0	0	0	0	0	1	0	0.0826344	0	1	0.000723373	0.571	#DIV/0!	0.00340319	-0.063
P30999	Isoform 3 of Catenin delta-1 OS=Mus musculus GN=Ctnnd1	CTND1_MOUSE	Ctnnd1 Catns Kiaa0384	1	0	0	0	0	0	0	0	0	1	0	0	0	0	0	0	0	0	0	0	1	0	0	0	0.0176909	-0.663	0	0.119965	-0.023	1	0.0108413	-0.578
P49222	Erythrocyte membrane protein band 4.2 OS=Mus musculus GN=Epb42 PE=2 SV=3	EPB42_MOUSE	Epb42 Epb4.2	1	0	0	0	0	0	0	0	0	0	0	0	1	0	1	0	0	0	0	0	0	0	0	0	0.000569833	0	2	0.166667	0	#DIV/0!	0.000353392	0.38
Q80TE4	Isoform 2 of Signal-induced proliferation-associated 1-like protein 2 OS=Mus musculus GN=Sipa1l2	SI1L2_MOUSE	Sipa1l2 Kiaa0545	1	0	0	0	0	0	0	0	1	0	0	0	0	0	0	1	0	0	0	0	0	0	0	0	0.089177	0	1	0.013572	-0.5	0	0.0110311	-0.211
Q922S8	Kinesin-like protein KIF2C OS=Mus musculus GN=Kif2c PE=1 SV=1	KIF2C_MOUSE	Kif2c	1	0	0	0	0	0	0	0	0	0	0	0	0	0	1	0	1	0	0	0	0	0	0	0	0.00659293	0	2	0.166667	0	#DIV/0!	0.00403618	0.279
Q99MZ3	Isoform 5 of Carbohydrate-responsive element-binding protein OS=Mus musculus GN=Mlxipl	MLXPL_MOUSE	Mlxipl Mio Wbscr14	1	0	0	0	0	0	0	0	0	1	0	0	0	0	0	0	0	0	0	0	0	0	0	1	0.0176909	-0.663	0	0.109494	0.04	1	0.0052896	-0.578
Q9CU62	Structural maintenance of chromosomes protein 1A OS=Mus musculus GN=Smc1a PE=1 SV=4	SMC1A_MOUSE	Smc1a Sb1.8 Smc1 Smc1l1 Smcb	1	1	0	0	0	0	0	0	0	0	0	0	0	0	0	0	0	0	0	1	0	0	0	0	0.256243	-1.091	0	0.0068583	0.529	#DIV/0!	0.0311344	-0.662
Q9CYR6	Phosphoacetylglucosamine mutase OS=Mus musculus GN=Pgm3 PE=1 SV=1	AGM1_MOUSE	Pgm3 Agm1 Pgm-3	1	0	0	0	0	0	0	0	0	0	0	0	1	0	0	1	0	0	0	0	0	0	0	0	0.00985303	0.458	2	0.166667	0	#DIV/0!	0.00616648	0.443
Q9DBR0	A-kinase anchor protein 8 OS=Mus musculus GN=Akap8 PE=1 SV=1	AKAP8_MOUSE	Akap8 Akap95	2	0	0	0	0	0	0	0	0	0	0	0	0	0	0	1	0	0	0	0	0	0	0	0	0.0060543	-0.33	0.5	0.166667	0	#DIV/0!	0.00381127	-0.329
P48453	Isoform 1 of Serine/threonine-protein phosphatase 2B catalytic subunit beta isoform OS=Mus musculus GN=Ppp3cb	PP2BB_MOUSE	Ppp3cb Calnb	0	1	1	0	0	0	0	0	0	0	0	0	0	0	0	0	1	0	0	0	0	0	0	0	0.00728739	-0.546	0.5	0.166667	0	#DIV/0!	0.00437459	-0.527
P70266	Isoform 2 of 6-phosphofructo-2-kinase/fructose-2,6-bisphosphatase 1 OS=Mus musculus GN=Pfkfb1	F261_MOUSE	Pfkfb1	0	1	0	0	0	0	0	0	0	1	0	0	0	0	0	1	0	0	0	0	0	0	0	0	0.0476149	0	1	0.00361423	-0.547	0	0.0173826	-0.18
Q3UTQ7	PR domain zinc finger protein 10 OS=Mus musculus GN=Prdm10 PE=1 SV=2	PRD10_MOUSE	Prdm10 Gm1112 Tris	0	1	0	0	0	0	0	1	0	0	0	0	0	0	0	0	0	0	0	0	1	0	0	0	0.00178472	-0.617	0	0.109404	0.053	1	2.44594e-05	-0.928
Q69Z23	Isoform 2 of Dynein heavy chain 17, axonemal OS=Mus musculus GN=Dnah17	DYH17_MOUSE	Dnah17 Dnahc17 Kiaa3028	0	1	0	0	0	1	0	0	0	0	0	0	0	1	0	0	0	0	0	0	0	0	0	0	0.000455142	-0.403	0.5	0.166667	0	#DIV/0!	0.000280246	-0.391
Q80U19	Isoform 2 of Disheveled-associated activator of morphogenesis 2 OS=Mus musculus GN=Daam2	DAAM2_MOUSE	Daam2 Kiaa0381	0	1	0	1	0	0	0	0	0	0	0	0	0	0	1	0	0	0	0	0	0	0	0	0	0.00953132	-0.478	0.5	0.166667	0	#DIV/0!	0.00590546	-0.463
Q8BGU5	Isoform 2 of Cyclin-Y OS=Mus musculus GN=Ccny	CCNY_MOUSE	Ccny Cfp1	0	1	0	0	0	0	0	1	0	0	0	0	0	1	0	0	0	0	0	0	0	0	0	0	0.0838681	0	1	0.0128422	-0.503	0	0.0137044	-0.219
Q8BHB4	WD repeat-containing protein 3 OS=Mus musculus GN=Wdr3 PE=2 SV=1	WDR3_MOUSE	Wdr3	0	1	0	0	0	0	0	0	0	0	0	0	1	0	0	0	0	0	0	0	1	0	0	0	0.0997311	0	1	0.00586536	0.534	#DIV/0!	0.000805467	0
Q8BY87	Ubiquitin carboxyl-terminal hydrolase 47 OS=Mus musculus GN=Usp47 PE=1 SV=2	UBP47_MOUSE	Usp47	0	1	0	0	0	0	0	0	1	0	0	0	0	0	0	0	0	0	0	1	0	0	0	0	0.00178472	-0.617	0	0.111689	0.049	1	4.94207e-05	-0.471
P05622	Platelet-derived growth factor receptor beta OS=Mus musculus GN=Pdgfrb PE=1 SV=1	PGFRB_MOUSE	Pdgfrb Pdgfr Pdgfr1	0	0	1	1	0	0	0	0	0	0	0	0	0	0	0	0	0	1	0	0	0	0	0	0	0.0078375	-0.479	0.5	0.166667	0	#DIV/0!	0.00482686	-0.464
Q3UHU5	Isoform 3 of Microtubule cross-linking factor 1 OS=Mus musculus GN=Mtcl1	MTCL1_MOUSE	Mtcl1 Ccdc165 Kiaa0802 Soga2	0	0	1	0	0	0	0	0	0	0	0	0	0	0	0	0	1	1	0	0	0	0	0	0	9.21499e-05	0	2	0.166667	0	#DIV/0!	5.54635e-05	0.423
Q60780	Isoform 2 of Growth arrest-specific protein 7 OS=Mus musculus GN=Gas7	GAS7_MOUSE	Gas7	0	0	1	0	0	0	0	0	0	0	0	0	0	1	0	0	0	0	0	0	0	0	0	1	0.0672757	0	1	0.000907433	0.569	#DIV/0!	0.00198346	0.467
Q684R7	Isoform 3 of FRAS1-related extracellular matrix protein 1 OS=Mus musculus GN=Frem1	FREM1_MOUSE	Frem1	0	0	1	0	0	0	0	0	0	0	0	0	0	0	0	0	0	0	1	1	0	0	0	0	6.29554e-05	-0.596	0	0.134972	1	#DIV/0!	2.87589e-05	0.417
Q922B2	Aspartate--tRNA ligase, cytoplasmic OS=Mus musculus GN=Dars PE=2 SV=2	SYDC_MOUSE	Dars	0	0	1	0	0	0	0	0	0	0	0	0	0	0	1	0	0	0	0	0	1	0	0	0	0.0751277	0	1	0.00586536	0.534	#DIV/0!	1.08685e-05	0
O35375	Isoform B5 of Neuropilin-2 OS=Mus musculus GN=Nrp2	NRP2_MOUSE	Nrp2	0	0	0	1	0	0	1	0	0	0	0	0	0	1	0	0	0	0	0	0	0	0	0	0	0.0826434	0	1	0.000229531	-0.598	0	0.00234835	-0.424
P22724	Protein Wnt-4 OS=Mus musculus GN=Wnt4 PE=1 SV=1	WNT4_MOUSE	Wnt4 Wnt-4	0	0	0	1	0	0	0	1	0	0	0	0	0	0	0	0	1	0	0	0	0	0	0	0	0.0245372	-0.232	1	0.0128422	-0.503	0	0.00433708	-0.509
P25119	Tumor necrosis factor receptor superfamily member 1B OS=Mus musculus GN=Tnfrsf1b PE=2 SV=1	TNR1B_MOUSE	Tnfrsf1b Tnfr-2 Tnfr2	0	0	0	1	0	0	0	0	0	0	0	0	1	0	1	0	0	0	0	0	0	0	0	0	9.19059e-06	0	2	0.166667	0	#DIV/0!	5.71405e-06	0.351
Q61937	Nucleophosmin OS=Mus musculus GN=Npm1 PE=1 SV=1	NPM_MOUSE	Npm1	0	0	0	2	0	0	0	0	0	0	0	0	0	0	0	1	0	0	0	0	0	0	0	0	0.0138991	-0.353	0.5	0.166667	0	#DIV/0!	0.00879082	-0.353
Q8BGD9	Eukaryotic translation initiation factor 4B OS=Mus musculus GN=Eif4b PE=1 SV=1	IF4B_MOUSE	Eif4b	0	0	0	1	0	0	0	0	0	0	0	0	0	0	0	1	0	1	0	0	0	0	0	0	0.00479342	0	2	0.166667	0	#DIV/0!	0.00300392	0.408
Q99MR6	Isoform D of Serrate RNA effector molecule homolog OS=Mus musculus GN=Srrt	SRRT_MOUSE	Srrt Ars2 Asr2	0	0	0	1	1	0	0	0	0	0	0	0	0	0	0	0	0	0	0	0	0	0	0	1	0.206462	-1.044	0	0.000907433	0.569	#DIV/0!	0.00993943	-1.001
Q9ESK9	RB1-inducible coiled-coil protein 1 OS=Mus musculus GN=Rb1cc1 PE=1 SV=3	RBCC1_MOUSE	Rb1cc1 Cc1 Kiaa0203	0	0	0	1	0	0	0	0	0	0	0	0	0	0	1	0	0	0	0	0	1	0	0	0	0.0752942	0	1	0.00586536	0.534	#DIV/0!	0.00995169	-0.075
Q3UHN9	Bifunctional heparan sulfate N-deacetylase/N-sulfotransferase 1 OS=Mus musculus GN=Ndst1 PE=1 SV=2	NDST1_MOUSE	Ndst1	0	0	0	0	1	0	0	0	0	0	0	0	2	0	0	0	0	0	0	0	0	0	0	0	0.0291481	0.467	2	0.166667	0	#DIV/0!	0.0177084	0.466
Q80W49	Isoform 3 of Beta/gamma crystallin domain-containing protein 3 OS=Mus musculus GN=Crybg3	CRBG3_MOUSE	Crybg3	0	0	0	0	1	0	0	0	0	0	0	0	0	0	0	0	0	0	1	0	1	0	0	0	0.00196224	-0.561	0	0.138871	1.005	#DIV/0!	0.00202745	0.494
Q8C8V1	Isoform 4 of Zinc finger protein ZXDC OS=Mus musculus GN=Zxdc	ZXDC_MOUSE	Zxdc	0	0	0	0	1	0	0	0	0	0	0	0	0	0	0	0	0	0	1	0	1	0	0	0	0.00196224	-0.561	0	0.138871	1.005	#DIV/0!	0.00202745	0.494
Q8K1F9	Lactase-like protein OS=Mus musculus GN=Lctl PE=2 SV=1	LCTL_MOUSE	Lctl Klph	0	0	0	0	1	0	0	0	0	0	0	0	0	0	0	0	1	0	0	0	0	0	1	0	0.127217	0	1	0.000723373	0.571	#DIV/0!	0.000405072	0
Q8VHT7	Transcription factor IIIA OS=Mus musculus GN=Gtf3a PE=2 SV=2	TF3A_MOUSE	Gtf3a	0	0	0	0	1	0	0	0	0	0	0	0	0	0	0	0	1	0	1	0	0	0	0	0	0.127217	0	1	0.00913921	0.643	#DIV/0!	0.00420151	0.519
Q922G2	Isoform 2 of Protein FAM76A OS=Mus musculus GN=Fam76a	FA76A_MOUSE	Fam76a	0	0	0	0	1	0	0	0	0	0	0	0	0	0	0	0	2	0	0	0	0	0	0	0	0.00192357	0	2	0.166667	0	#DIV/0!	0.00113515	0.327
Q9WV54	Acid ceramidase OS=Mus musculus GN=Asah1 PE=1 SV=1	ASAH1_MOUSE	Asah1 Asah	0	0	0	0	1	0	0	0	0	0	0	0	1	0	0	0	0	1	0	0	0	0	0	0	0.0260147	0.612	2	0.166667	0	#DIV/0!	0.015785	0.59
A6H690	IQ and AAA domain-containing protein 1-like OS=Mus musculus GN=Iqca1p1 PE=2 SV=3	IQCAL_MOUSE	Iqca1l Iqca1p1	0	0	0	0	0	1	0	0	0	0	0	1	0	0	0	0	0	1	0	0	0	0	0	0	0.106318	0	1	8.22406e-06	-0.587	0	0.00014592	-0.402
O88532	Zinc finger RNA-binding protein OS=Mus musculus GN=Zfr PE=1 SV=2	ZFR_MOUSE	Zfr	0	0	0	0	0	1	0	1	0	0	0	0	0	0	0	0	0	0	0	0	1	0	0	0	0.00715955	-0.64	0	0.109404	0.053	1	0.00121353	-0.498
Q6ZWR6	Isoform 4 of Nesprin-1 OS=Mus musculus GN=Syne1	SYNE1_MOUSE	Syne1	0	0	0	0	0	1	0	0	0	0	0	0	0	0	0	0	0	0	0	1	0	0	0	1	0.00715955	-0.64	0	0.0645151	0.957	#DIV/0!	0.0182777	-0.206
Q8K411	Presequence protease, mitochondrial OS=Mus musculus GN=Pitrm1 PE=1 SV=1	PREP_MOUSE	Pitrm1 Kiaa1104 Ntup1	0	0	0	0	0	1	0	0	0	0	0	1	1	0	0	0	0	0	0	0	0	0	0	0	0.112673	0	1	8.22406e-06	-0.587	0	2.0657e-05	-0.388
Q9CS00	Cactin OS=Mus musculus GN=Cactin PE=1 SV=2	CATIN_MOUSE	Cactin	0	0	0	0	0	1	0	0	0	0	0	1	0	0	0	0	0	0	0	1	0	0	0	0	0.00715955	-0.64	0	0.0806344	-0.106	1	0.0126462	-0.599
Q9JHY3	WAP four-disulfide core domain protein 12 OS=Mus musculus GN=Wfdc12 PE=2 SV=1	WFD12_MOUSE	Wfdc12 Swam2	0	0	0	0	0	1	0	0	0	0	0	0	0	0	0	0	2	0	0	0	0	0	0	0	0.0248661	0	2	0.166667	0	#DIV/0!	0.014908	0
D3YZU1	SH3 and multiple ankyrin repeat domains protein 1 OS=Mus musculus GN=Shank1 PE=1 SV=1	SHAN1_MOUSE	Shank1	0	0	0	0	0	0	1	0	0	0	0	0	0	0	0	0	0	0	0	0	0	1	0	1	0.166667	0	#DIV/0!	0.00656978	0.339	2	0.00391343	-0.598
Q61792	LIM and SH3 domain protein 1 OS=Mus musculus GN=Lasp1 PE=1 SV=1	LASP1_MOUSE	Lasp1 Mln50	0	0	0	0	0	0	1	0	1	0	0	0	0	0	0	0	0	0	0	0	0	0	1	0	0.166667	0	#DIV/0!	0.00418758	-0.374	0.5	0.00247462	-0.916
Q9CQF6	L-aminoadipate-semialdehyde dehydrogenase-phosphopantetheinyl transferase OS=Mus musculus GN=Aasdhppt PE=2 SV=1	ADPPT_MOUSE	Aasdhppt	0	0	0	0	0	0	1	0	0	0	1	0	0	0	0	0	0	0	0	0	0	1	0	0	0.166667	0	#DIV/0!	0.00234075	-0.508	0.5	0.00139825	-0.493
P01193	Pro-opiomelanocortin OS=Mus musculus GN=Pomc PE=2 SV=1	COLI_MOUSE	Pomc Pomc1	0	0	0	0	0	0	0	1	1	0	0	0	0	1	0	0	0	0	0	0	0	0	0	0	0.0103208	0.648	#DIV/0!	0.0221517	-0.885	0	0.0514431	-0.057
Q3V1U8	ELMO domain-containing protein 1 OS=Mus musculus GN=Elmod1 PE=2 SV=2	ELMD1_MOUSE	Elmod1	0	0	0	0	0	0	0	1	0	0	0	0	0	0	0	0	0	0	0	0	0	1	0	1	0.166667	0	#DIV/0!	0.00101005	0.536	2	0.000592264	-0.503
Q5U4C3	Splicing factor, arginine/serine-rich 19 OS=Mus musculus GN=Scaf1 PE=1 SV=1	SFR19_MOUSE	Scaf1 Sfrs19	0	0	0	0	0	0	0	1	0	0	1	0	0	0	0	0	0	0	0	0	0	1	0	0	0.166667	0	#DIV/0!	0.00418373	-0.386	0.5	0.00246057	-0.91
Q64449	Isoform 2 of C-type mannose receptor 2 OS=Mus musculus GN=Mrc2	MRC2_MOUSE	Mrc2 Kiaa0709	0	0	0	0	0	0	0	1	1	0	0	0	0	0	0	0	0	0	0	0	1	0	0	0	0.166667	0	#DIV/0!	0.0190416	-0.319	0.5	0.0109988	-0.312
Q80UZ0	Isoform 2 of FYVE, RhoGEF and PH domain-containing protein 5 OS=Mus musculus GN=Fgd5	FGD5_MOUSE	Fgd5	0	0	0	0	0	0	0	1	0	0	0	0	0	0	0	0	0	0	0	0	0	1	0	1	0.166667	0	#DIV/0!	0.00101005	0.536	2	0.000592264	-0.503
Q8BSF5	Kelch-like protein 38 OS=Mus musculus GN=Klhl38 PE=2 SV=1	KLH38_MOUSE	Klhl38	0	0	0	0	0	0	0	1	0	0	0	0	1	0	0	0	0	0	0	0	0	0	0	1	0.00566811	0.635	#DIV/0!	0.0809516	0.115	1	0.011685	0
Q8C561	Isoform 3 of LMBR1 domain-containing protein 2 OS=Mus musculus GN=Lmbrd2	LMBD2_MOUSE	Lmbrd2	0	0	0	0	0	0	0	1	0	0	0	0	0	0	0	0	0	0	0	1	0	0	0	1	0.166667	0	#DIV/0!	2.60082e-07	0.501	2	1.51801e-07	0
Q8CDV0	Coiled-coil domain-containing protein 178 OS=Mus musculus GN=Ccdc178 PE=2 SV=2	CC178_MOUSE	Ccdc178	0	0	0	0	0	0	0	2	0	0	0	0	0	1	0	0	0	0	0	0	0	0	0	0	0.0103208	0.648	#DIV/0!	0.0230152	-0.669	0	0.0504676	-0.053
Q91ZV7	Plexin domain-containing protein 1 OS=Mus musculus GN=Plxdc1 PE=1 SV=2	PLDX1_MOUSE	Plxdc1 Tem7	0	0	0	0	0	0	0	1	1	0	0	0	0	0	0	0	0	0	1	0	0	0	0	0	0.166667	0	#DIV/0!	0.0839026	-0.066	0.5	0.0495692	-0.065
Q921G8	Gamma-tubulin complex component 2 OS=Mus musculus GN=Tubgcp2 PE=2 SV=2	GCP2_MOUSE	Tubgcp2 Gcp2	0	0	0	0	0	0	0	1	0	0	1	0	0	0	1	0	0	0	0	0	0	0	0	0	0.00753942	0.641	#DIV/0!	0.0617636	-0.945	0	0.0198601	-0.191
Q99JW2	Aminoacylase-1 OS=Mus musculus GN=Acy1 PE=1 SV=1	ACY1_MOUSE	Acy1	0	0	0	0	0	0	0	1	0	0	0	0	1	1	0	0	0	0	0	0	0	0	0	0	0.257041	1.096	#DIV/0!	0.0128422	-0.503	0	0.0390019	0.704
Q99LY9	NADH dehydrogenase [ubiquinone] iron-sulfur protein 5 OS=Mus musculus GN=Ndufs5 PE=1 SV=3	NDUS5_MOUSE	Ndufs5	0	0	0	0	0	0	0	1	1	0	0	0	0	0	0	0	0	0	0	0	1	0	0	0	0.166667	0	#DIV/0!	0.0190416	-0.319	0.5	0.0109988	-0.312
Q9DBE9	pre-rRNA processing protein FTSJ3 OS=Mus musculus GN=Ftsj3 PE=1 SV=1	SPB1_MOUSE	Ftsj3	0	0	0	0	0	0	0	1	0	0	0	0	0	0	0	1	0	0	0	0	0	1	0	0	0.0299725	0.681	#DIV/0!	0.0904009	0.094	1	0.0276461	0.329
Q9WTX7	Four and a half LIM domains protein 5 OS=Mus musculus GN=Fhl5 PE=1 SV=1	FHL5_MOUSE	Fhl5 Act	0	0	0	0	0	0	0	2	0	0	0	0	0	0	0	0	1	0	0	0	0	0	0	0	0.00218426	0.559	#DIV/0!	0.0230152	-0.669	0	0.0150905	-0.227
Q9WTX8	Isoform 2 of Mitotic spindle assembly checkpoint protein MAD1 OS=Mus musculus GN=Mad1l1	MD1L1_MOUSE	Mad1l1 Mad1	0	0	0	0	0	0	0	1	0	0	0	0	0	0	0	0	0	1	0	0	0	0	0	1	0.00414868	0.629	#DIV/0!	0.0809516	0.115	1	0.0101054	0
P22682	E3 ubiquitin-protein ligase CBL OS=Mus musculus GN=Cbl PE=1 SV=3	CBL_MOUSE	Cbl	0	0	0	0	0	0	0	0	1	0	0	0	0	0	0	0	0	0	0	1	1	0	0	0	0.166667	0	#DIV/0!	0.00156635	0.461	2	0.000908363	0.449
Q06219	Isoform NURR1A of Nuclear receptor subfamily 4 group A member 2 OS=Mus musculus GN=Nr4a2	NR4A2_MOUSE	Nr4a2 Nurr1	0	0	0	0	0	0	0	0	1	0	0	0	0	1	0	0	0	0	0	0	0	0	0	1	0.0103208	0.648	#DIV/0!	0.0793867	0.12	1	0.0165362	0.635
Q62381	Isoform 2 of Tolloid-like protein 1 OS=Mus musculus GN=Tll1	TLL1_MOUSE	Tll1 Tll	0	0	0	0	0	0	0	0	1	0	0	0	0	0	0	0	0	0	0	0	0	0	2	0	0.166667	0	#DIV/0!	0.00298873	0.432	2	0.00175685	-0.5
Q6PDE7	Isoform 2 of Gamma-glutamyltransferase 6 OS=Mus musculus GN=Ggt6	GGT6_MOUSE	Ggt6	0	0	0	0	0	0	0	0	1	0	0	0	0	0	0	0	0	0	0	1	0	0	0	1	0.166667	0	#DIV/0!	5.12645e-06	0.506	2	2.99095e-06	0.449
Q6VGS5	Isoform 2 of Protein Daple OS=Mus musculus GN=Ccdc88c	DAPLE_MOUSE	Ccdc88c Daple	0	0	0	0	0	0	0	0	1	0	0	0	1	0	0	0	0	0	1	0	0	0	0	0	0.00566811	0.635	#DIV/0!	0.024438	0.262	1	0.0382158	0.705
Q923A2	Protein Spindly OS=Mus musculus GN=Spdl1 PE=1 SV=2	SPDLY_MOUSE	Spdl1 Ccdc99	0	0	0	0	0	0	0	0	1	0	1	0	0	0	0	0	1	0	0	0	0	0	0	0	0.00218426	0.559	#DIV/0!	0.0603935	-0.942	0	0.00264794	-0.374
B7ZCC9	Isoform 2 of Probable G-protein coupled receptor 112 OS=Mus musculus GN=Gpr112	AGRG4_MOUSE	Adgrg4 Gpr112	0	0	0	0	0	0	0	0	0	1	0	0	0	0	0	0	0	0	1	0	0	1	0	0	0.166667	0	#DIV/0!	0.00957878	0.558	2	0.00574183	0.541
P53351	Serine/threonine-protein kinase PLK2 OS=Mus musculus GN=Plk2 PE=1 SV=1	PLK2_MOUSE	Plk2 Snk	0	0	0	0	0	0	0	0	0	1	0	1	0	0	0	0	0	0	0	1	0	0	0	0	0.166667	0	#DIV/0!	0.00030011	-0.499	0.5	0.000176941	-0.485
P97445	Voltage-dependent P/Q-type calcium channel subunit alpha-1A OS=Mus musculus GN=Cacna1a PE=1 SV=2	CAC1A_MOUSE	Cacna1a Caca1a Cach4 Cacn3 Cacnl1a4 Ccha1a	0	0	0	0	0	0	0	0	0	2	0	0	0	0	0	1	0	0	0	0	0	0	0	0	0.0299725	0.681	#DIV/0!	0.0611385	-0.707	0	0.0409421	-0.072
Q07417	Short-chain specific acyl-CoA dehydrogenase, mitochondrial OS=Mus musculus GN=Acads PE=1 SV=2	ACADS_MOUSE	Acads	0	0	0	0	0	0	0	0	0	1	0	1	0	0	0	0	0	0	1	0	0	0	0	0	0.166667	0	#DIV/0!	0.0196214	-0.239	0.5	0.011821	-0.234
Q3UIJ9	Myocardial zonula adherens protein OS=Mus musculus GN=Myzap PE=1 SV=1	MYZAP_MOUSE	Myzap Myozap	0	0	0	0	0	0	0	0	0	1	0	0	0	0	0	0	0	0	0	0	0	1	1	0	0.166667	0	#DIV/0!	0.000142211	0.455	2	8.39694e-05	-0.547
Q6DIC0	Probable global transcription activator SNF2L2 OS=Mus musculus GN=Smarca2 PE=1 SV=1	SMCA2_MOUSE	Smarca2 Baf190b Brm Snf2a Snf2l2	0	0	0	0	0	0	0	0	0	1	0	0	0	0	0	0	1	0	0	0	0	0	1	0	0.00218426	0.559	#DIV/0!	0.10738	0.044	1	8.89668e-05	0.442
Q91YD6	Isoform 2 of Villin-like protein OS=Mus musculus GN=Vill	VILL_MOUSE	Vill Villp	0	0	0	0	0	0	0	0	0	1	0	1	0	0	1	0	0	0	0	0	0	0	0	0	0.00753942	0.641	#DIV/0!	0.0890198	-0.984	0	0.010532	-0.246
P30276	G2/mitotic-specific cyclin-B2 OS=Mus musculus GN=Ccnb2 PE=2 SV=2	CCNB2_MOUSE	Ccnb2 Cycb2	0	0	0	0	0	0	0	0	0	0	1	0	0	0	0	0	0	0	0	1	0	0	0	1	0.166667	0	#DIV/0!	0.00886783	0.334	2	0.00524527	-0.101
Q03157	Amyloid-like protein 1 OS=Mus musculus GN=Aplp1 PE=1 SV=1	APLP1_MOUSE	Aplp1	0	0	0	0	0	0	0	0	0	0	1	0	0	0	1	0	0	0	0	0	1	0	0	0	0.00753942	0.641	#DIV/0!	0.0859054	-0.093	1	0.000174613	0.435
Q3UNX5	Isoform 2 of Acyl-coenzyme A synthetase ACSM3, mitochondrial OS=Mus musculus GN=Acsm3	ACSM3_MOUSE	Acsm3 Sa Sah	0	0	0	0	0	0	0	0	0	0	1	0	0	0	0	0	0	0	1	0	0	0	0	1	0.166667	0	#DIV/0!	0.00418004	0.496	2	0.00252577	0.482
Q5SSL4	Isoform 4 of Active breakpoint cluster region-related protein OS=Mus musculus GN=Abr	ABR_MOUSE	Abr	0	0	0	0	0	0	0	0	0	0	1	0	0	0	0	0	0	0	1	0	0	0	1	0	0.166667	0	#DIV/0!	0.0045446	0.499	2	0.00274705	0.482
Q8C854	Isoform 2 of Myelin expression factor 2 OS=Mus musculus GN=Myef2	MYEF2_MOUSE	Myef2 Kiaa1341 Mef2	0	0	0	0	0	0	0	0	0	0	1	0	0	2	0	0	0	0	0	0	0	0	0	0	0.280332	0.787	#DIV/0!	4.33116e-05	-0.585	0	0.0205822	0.456
Q8CJH3	Plexin-B1 OS=Mus musculus GN=Plxnb1 PE=1 SV=2	PLXB1_MOUSE	Plxnb1 Kiaa0407	0	0	0	0	0	0	0	0	0	0	1	1	0	0	0	0	0	0	0	0	0	0	1	0	0.166667	0	#DIV/0!	0.00023583	-0.464	0.5	0.000140892	-0.973
Q91XF0	Pyridoxine-5'-phosphate oxidase OS=Mus musculus GN=Pnpo PE=1 SV=1	PNPO_MOUSE	Pnpo	0	0	0	0	0	0	0	0	0	0	1	1	0	0	0	0	0	0	1	0	0	0	0	0	0.166667	0	#DIV/0!	0.00864499	-0.29	0.5	0.00523979	-0.284
Q9D4H4	Isoform 2 of Angiomotin-like protein 1 OS=Mus musculus GN=Amotl1	AMOL1_MOUSE	Amotl1	0	0	0	0	0	0	0	0	0	0	1	0	0	0	0	0	0	0	1	0	0	0	0	1	0.166667	0	#DIV/0!	0.00418004	0.496	2	0.00252577	0.482
Q9R1S8	Calpain-7 OS=Mus musculus GN=Capn7 PE=2 SV=1	CAN7_MOUSE	Capn7 Palbh	0	0	0	0	0	0	0	0	0	0	1	0	0	0	0	1	0	0	0	1	0	0	0	0	0.0299725	0.681	#DIV/0!	0.0827484	-0.101	1	0.0049609	0.494
A2A9C3	Isoform 2 of Protein SZT2 OS=Mus musculus GN=Szt2	SZT2_MOUSE	Szt2	0	0	0	0	0	0	0	0	0	0	0	1	1	0	0	0	0	0	1	0	0	0	0	0	0.00566811	0.635	#DIV/0!	0.0654597	0.115	1	0.0141243	0.558
B2RX12	Isoform 3 of Canalicular multispecific organic anion transporter 2 OS=Mus musculus GN=Abcc3	MRP3_MOUSE	Abcc3 Cmoat2 Mrp3	0	0	0	0	0	0	0	0	0	0	0	1	0	0	0	0	0	0	0	0	0	0	1	1	0.166667	0	#DIV/0!	0.00229525	0.384	2	0.0013674	-0.587
Q3V080	Zinc finger protein 583 OS=Mus musculus GN=Znf583 PE=2 SV=1	ZN583_MOUSE	Znf583 Zfp583	0	0	0	0	0	0	0	0	0	0	0	1	0	0	0	0	0	0	0	0	0	0	2	0	0.166667	0	#DIV/0!	0.00202914	0.309	2	0.00120933	-0.587
Q8BTM8	Filamin-A OS=Mus musculus GN=Flna PE=1 SV=5	FLNA_MOUSE	Flna Fln Fln1	0	0	0	0	0	0	0	0	0	0	0	1	0	0	1	0	0	0	0	0	1	0	0	0	0.00753942	0.641	#DIV/0!	0.0837516	-0.097	1	0.000114058	0
Q8VC33	Nucleoredoxin-like protein 1 OS=Mus musculus GN=Nxnl1 PE=2 SV=1	NXNL1_MOUSE	Nxnl1 Rdcvf Txnl6	0	0	0	0	0	0	0	0	0	0	0	2	0	0	0	0	0	0	0	0	0	0	0	1	0.166667	0	#DIV/0!	0.000461096	-0.369	0.5	0.000275489	-0.369
P17182	Alpha-enolase OS=Mus musculus GN=Eno1 PE=1 SV=3	ENOA_MOUSE	Eno1 Eno-1	13	9	10	8	5	4	3	4	9	4	3	4	16	5	7	7	5	4	8	3	10	3	2	2	0.136978	-0.268	0.897959	0.188737	0.418	1.03704	0.00024148	0
Q9R1P4	Proteasome subunit alpha type-1 OS=Mus musculus GN=Psma1 PE=1 SV=1	PSA1_MOUSE	Psma1	12	12	11	5	9	10	10	16	17	7	6	7	16	20	11	7	7	8	6	11	10	6	8	6	1.39112	0.787	1.16949	0.789593	-1.199	0.746032	0.0936346	0
A2A8L5	Receptor-type tyrosine-protein phosphatase F OS=Mus musculus GN=Ptprf PE=1 SV=1	PTPRF_MOUSE	Ptprf Lar	5	3	4	1	2	1	1	0	0	0	0	1	1	1	4	3	2	2	1	0	2	0	0	0	0.072706	-0.374	0.8125	0.00279608	0.281	1.5	0.0154636	-0.191
P10126	Elongation factor 1-alpha 1 OS=Mus musculus GN=Eef1a1 PE=1 SV=3	EF1A1_MOUSE	Eef1a1 Eef1a	6	1	3	5	0	1	0	1	1	0	0	0	4	1	0	3	2	1	1	2	1	1	0	0	0.97946	-0.706	0.6875	0.370234	1.236	2.5	0.193035	-0.347
P97298	Pigment epithelium-derived factor OS=Mus musculus GN=Serpinf1 PE=1 SV=2	PEDF_MOUSE	Serpinf1 Pedf Sdf3	39	51	41	30	51	33	35	61	60	55	51	38	55	58	35	35	47	36	21	51	42	47	47	44	2.284	0.994	1.08571	1.73817	-1.442	0.84	0.0455743	0
A6H694	Leucine-rich repeat-containing protein 63 OS=Mus musculus GN=Lrrc63 PE=2 SV=1	LRC63_MOUSE	Lrrc63	1	0	0	0	0	0	0	0	0	0	0	0	1	0	0	0	0	0	0	0	0	0	0	0	0.0826344	0	1	0.166667	0	#DIV/0!	0.0485886	-0.063
O08553	Dihydropyrimidinase-related protein 2 OS=Mus musculus GN=Dpysl2 PE=1 SV=2	DPYL2_MOUSE	Dpysl2 Crmp2 Ulip2	1	0	0	0	0	0	0	0	0	0	0	0	0	0	0	0	0	0	1	0	0	0	0	0	0.0176909	-0.663	0	0.00913921	0.643	#DIV/0!	0.0550018	0
O35215	D-dopachrome decarboxylase OS=Mus musculus GN=Ddt PE=1 SV=3	DOPD_MOUSE	Ddt	1	0	0	0	0	0	0	0	0	0	0	0	1	0	0	0	0	0	0	0	0	0	0	0	0.0826344	0	1	0.166667	0	#DIV/0!	0.0485886	-0.063
P08003	Protein disulfide-isomerase A4 OS=Mus musculus GN=Pdia4 PE=1 SV=3	PDIA4_MOUSE	Pdia4 Cai Erp72	1	0	0	0	0	0	0	0	0	0	0	0	1	0	0	0	0	0	0	0	0	0	0	0	0.0826344	0	1	0.166667	0	#DIV/0!	0.0485886	-0.063
P28705	Retinoic acid receptor RXR-gamma OS=Mus musculus GN=Rxrg PE=2 SV=2	RXRG_MOUSE	Rxrg Nr2b3	1	0	0	0	0	0	0	0	0	0	0	0	0	0	0	0	0	0	0	0	0	0	0	1	0.0176909	-0.663	0	0.000907433	0.569	#DIV/0!	0.0219499	-0.661
P49718	DNA replication licensing factor MCM5 OS=Mus musculus GN=Mcm5 PE=2 SV=1	MCM5_MOUSE	Mcm5 Cdc46 Mcmd5	1	0	0	0	0	0	0	0	0	0	0	0	0	1	0	0	0	0	0	0	0	0	0	0	0.0965638	0	1	0.166667	0	#DIV/0!	0.0569746	0
P97315	Cysteine and glycine-rich protein 1 OS=Mus musculus GN=Csrp1 PE=1 SV=3	CSRP1_MOUSE	Csrp1 Crp1 Csrp	1	0	0	0	0	0	0	0	0	0	0	0	1	0	0	0	0	0	0	0	0	0	0	0	0.0826344	0	1	0.166667	0	#DIV/0!	0.0485886	-0.063
Q2VIS4	Filaggrin-2 OS=Mus musculus GN=Flg2 PE=2 SV=2	FILA2_MOUSE	Flg2	1	0	0	0	0	0	0	0	0	0	0	0	1	0	0	0	0	0	0	0	0	0	0	0	0.0826344	0	1	0.166667	0	#DIV/0!	0.0485886	-0.063
Q3TLH4	Isoform 5 of Protein PRRC2C OS=Mus musculus GN=Prrc2c	PRC2C_MOUSE	Prrc2c Bat2d Bat2d1 Bat2l2 Kiaa1096	1	0	0	0	0	0	0	0	0	0	0	0	0	1	0	0	0	0	0	0	0	0	0	0	0.0965638	0	1	0.166667	0	#DIV/0!	0.0569746	0
Q571G4	Isoform 2 of Tesmin OS=Mus musculus GN=Mtl5	LIN54_MOUSE	Lin54 Kiaa2037	1	0	0	0	0	0	0	0	0	0	0	0	0	0	0	0	0	0	0	0	1	0	0	0	0.0176909	-0.663	0	0.00586536	0.534	#DIV/0!	0.0136355	-0.661
Q5SS00	DBF4-type zinc finger-containing protein 2 homolog OS=Mus musculus GN=Zdbf2 PE=2 SV=1	ZDBF2_MOUSE	Zdbf2	1	0	0	0	0	0	0	0	0	0	0	0	0	0	0	0	0	0	0	0	0	0	1	0	0.0176909	-0.663	0	0.000723373	0.571	#DIV/0!	0.022604	-0.661
Q8BYJ6	Isoform 4 of TBC1 domain family member 4 OS=Mus musculus GN=Tbc1d4	TBCD4_MOUSE	Tbc1d4 As160 Kiaa0603	1	0	0	0	0	0	0	0	0	0	0	0	1	0	0	0	0	0	0	0	0	0	0	0	0.0826344	0	1	0.166667	0	#DIV/0!	0.0485886	-0.063
Q8CDZ2	Protein-lysine methyltransferase METTL21E OS=Mus musculus GN=Mettl21e PE=2 SV=1	MT21E_MOUSE	Mettl21e	1	0	0	0	0	0	0	0	0	0	0	0	0	0	0	1	0	0	0	0	0	0	0	0	0.089177	0	1	0.166667	0	#DIV/0!	0.0531073	0
Q8K0R6	Glycolipid transfer protein domain-containing protein 2 OS=Mus musculus GN=Gltpd2 PE=2 SV=1	GLTD2_MOUSE	Gltpd2	1	0	0	0	0	0	0	0	0	0	0	0	0	0	0	0	0	0	1	0	0	0	0	0	0.0176909	-0.663	0	0.00913921	0.643	#DIV/0!	0.0550018	0
Q91V76	Ester hydrolase C11orf54 homolog OS=Mus musculus PE=2 SV=1	CK054_MOUSE	0	1	0	0	0	0	0	0	0	0	0	0	0	0	0	0	1	0	0	0	0	0	0	0	0	0.089177	0	1	0.166667	0	#DIV/0!	0.0531073	0
Q91ZU6	Isoform 4 of Dystonin OS=Mus musculus GN=Dst	DYST_MOUSE	Dst Bpag1 Macf2	1	0	0	0	0	0	0	0	0	0	0	0	0	0	1	0	0	0	0	0	0	0	0	0	0.0886105	0	1	0.166667	0	#DIV/0!	0.0521813	0
Q922J9	Isoform 4 of Fatty acyl-CoA reductase 1 OS=Mus musculus GN=Far1	FACR1_MOUSE	Far1 Mlstd2	1	0	0	0	0	0	0	0	0	0	0	0	0	0	0	0	0	0	0	0	1	0	0	0	0.0176909	-0.663	0	0.00586536	0.534	#DIV/0!	0.0136355	-0.661
Q9JLV5	Cullin-3 OS=Mus musculus GN=Cul3 PE=1 SV=1	CUL3_MOUSE	Cul3	1	0	0	0	0	0	0	0	0	0	0	0	1	0	0	0	0	0	0	0	0	0	0	0	0.0826344	0	1	0.166667	0	#DIV/0!	0.0485886	-0.063
Q9Z0E8	Solute carrier family 22 member 5 OS=Mus musculus GN=Slc22a5 PE=1 SV=1	S22A5_MOUSE	Slc22a5 Octn2	1	0	0	0	0	0	0	0	0	0	0	0	0	0	0	0	1	0	0	0	0	0	0	0	0.0323914	-0.209	1	0.166667	0	#DIV/0!	0.0187417	-0.209
Q9Z2U2	Isoform 2 of Zinc finger protein 292 OS=Mus musculus GN=Zfp292	ZN292_MOUSE	Zfp292 Zfp15	1	0	0	0	0	0	0	0	0	0	0	0	0	0	0	0	0	0	0	0	1	0	0	0	0.0176909	-0.663	0	0.00586536	0.534	#DIV/0!	0.0136355	-0.661
A2AI08	Taperin OS=Mus musculus GN=Tprn PE=1 SV=1	TPRN_MOUSE	Tprn	0	1	0	0	0	0	0	0	0	0	0	0	0	0	0	0	0	0	0	1	0	0	0	0	0.00178472	-0.617	0	0.0068583	0.529	#DIV/0!	0.0324591	-0.159
B2RX88	Isoform 4 of Centrosome and spindle pole associated protein 1 OS=Mus musculus GN=Cspp1	CSPP1_MOUSE	Cspp1 Cspp	0	1	0	0	0	0	0	0	0	0	0	0	0	1	0	0	0	0	0	0	0	0	0	0	0.0838681	0	1	0.166667	0	#DIV/0!	0.0488906	0
O35709	Ectoderm-neural cortex protein 1 OS=Mus musculus GN=Enc1 PE=2 SV=2	ENC1_MOUSE	Enc1 Enc-1	0	1	0	0	0	0	0	0	0	0	0	0	0	0	0	0	1	0	0	0	0	0	0	0	0.0731992	0	1	0.166667	0	#DIV/0!	0.0418059	-0.111
O70138	Neutrophil collagenase OS=Mus musculus GN=Mmp8 PE=2 SV=2	MMP8_MOUSE	Mmp8	0	1	0	0	0	0	0	0	0	0	0	0	0	0	0	1	0	0	0	0	0	0	0	0	0.0476149	0	1	0.166667	0	#DIV/0!	0.0280283	0
O88665	Bromodomain-containing protein 7 OS=Mus musculus GN=Brd7 PE=1 SV=1	BRD7_MOUSE	Brd7 Bp75	0	1	0	0	0	0	0	0	0	0	0	0	0	0	0	1	0	0	0	0	0	0	0	0	0.0476149	0	1	0.166667	0	#DIV/0!	0.0280283	0
P0DM65	Beclin-2 OS=Mus musculus GN=Becn2 PE=1 SV=1	BECN2_MOUSE	Becn2	0	1	0	0	0	0	0	0	0	0	0	0	0	0	0	0	0	0	0	0	0	0	1	0	0.00178472	-0.617	0	0.000723373	0.571	#DIV/0!	0.0474814	-0.614
P62947	60S ribosomal protein L41 OS=Mus musculus GN=Rpl41 PE=2 SV=1	RL41_MOUSE	Rpl41	0	1	0	0	0	0	0	0	0	0	0	0	1	0	0	0	0	0	0	0	0	0	0	0	0.0997311	0	1	0.166667	0	#DIV/0!	0.0579289	0
Q3TT99	Glycerophosphodiester phosphodiesterase domain-containing protein 4 OS=Mus musculus GN=Gdpd4 PE=2 SV=1	GDPD4_MOUSE	Gdpd4 Gde6	0	1	0	0	0	0	0	0	0	0	0	0	0	0	0	1	0	0	0	0	0	0	0	0	0.0476149	0	1	0.166667	0	#DIV/0!	0.0280283	0
Q62245	Son of sevenless homolog 1 OS=Mus musculus GN=Sos1 PE=1 SV=2	SOS1_MOUSE	Sos1	0	1	0	0	0	0	0	0	0	0	0	0	0	0	1	0	0	0	0	0	0	0	0	0	0.0926029	0	1	0.166667	0	#DIV/0!	0.0538737	0
Q69ZS0	Isoform 3 of E3 ubiquitin-protein ligase PDZRN3 OS=Mus musculus GN=Pdzrn3	PZRN3_MOUSE	Pdzrn3 Kiaa1095 Semcap3	0	1	0	0	0	0	0	0	0	0	0	0	0	0	0	0	0	0	1	0	0	0	0	0	0.00178472	-0.617	0	0.00913921	0.643	#DIV/0!	0.0508858	0
Q7TNC4	Isoform 3 of Putative RNA-binding protein Luc7-like 2 OS=Mus musculus GN=Luc7l2	LC7L2_MOUSE	Luc7l2	0	1	0	0	0	0	0	0	0	0	0	0	0	0	0	0	0	0	0	1	0	0	0	0	0.00178472	-0.617	0	0.0068583	0.529	#DIV/0!	0.0324591	-0.159
Q8C1A5	Thimet oligopeptidase OS=Mus musculus GN=Thop1 PE=1 SV=1	THOP1_MOUSE	Thop1	0	1	0	0	0	0	0	0	0	0	0	0	0	0	1	0	0	0	0	0	0	0	0	0	0.0926029	0	1	0.166667	0	#DIV/0!	0.0538737	0
Q8CG19	Isoform 3 of Latent-transforming growth factor beta-binding protein 1 OS=Mus musculus GN=Ltbp1	LTBP1_MOUSE	Ltbp1	0	1	0	0	0	0	0	0	0	0	0	0	0	0	0	0	0	0	0	0	1	0	0	0	0.00178472	-0.617	0	0.00586536	0.534	#DIV/0!	0.0339839	-0.614
Q8VDK1	Isoform 2 of Nitrilase homolog 1 OS=Mus musculus GN=Nit1	NIT1_MOUSE	Nit1	0	1	0	0	0	0	0	0	0	0	0	0	1	0	0	0	0	0	0	0	0	0	0	0	0.0997311	0	1	0.166667	0	#DIV/0!	0.0579289	0
Q8VE08	F-box only protein 33 OS=Mus musculus GN=Fbxo33 PE=1 SV=3	FBX33_MOUSE	Fbxo33	0	1	0	0	0	0	0	0	0	0	0	0	0	0	0	0	1	0	0	0	0	0	0	0	0.0731992	0	1	0.166667	0	#DIV/0!	0.0418059	-0.111
Q8VE73	Isoform 2 of Cullin-7 OS=Mus musculus GN=Cul7	CUL7_MOUSE	Cul7 Kiaa0076	0	1	0	0	0	0	0	0	0	0	0	0	0	0	0	0	1	0	0	0	0	0	0	0	0.0731992	0	1	0.166667	0	#DIV/0!	0.0418059	-0.111
Q8VGS1	Olfactory receptor 1038 OS=Mus musculus GN=Olfr1038 PE=2 SV=1	O1038_MOUSE	Olfr1038 Mor185-3 Olfr1038-ps	0	1	0	0	0	0	0	0	0	0	0	0	1	0	0	0	0	0	0	0	0	0	0	0	0.0997311	0	1	0.166667	0	#DIV/0!	0.0579289	0
Q99104	Unconventional myosin-Va OS=Mus musculus GN=Myo5a PE=1 SV=2	MYO5A_MOUSE	Myo5a Dilute	0	1	0	0	0	0	0	0	0	0	0	0	0	0	0	0	0	0	0	0	0	0	1	0	0.00178472	-0.617	0	0.000723373	0.571	#DIV/0!	0.0474814	-0.614
Q9CR36	Gastrokine-1 OS=Mus musculus GN=Gkn1 PE=2 SV=2	GKN1_MOUSE	Gkn1 Amp18 Ca11	0	1	0	0	0	0	0	0	0	0	0	0	0	1	0	0	0	0	0	0	0	0	0	0	0.0838681	0	1	0.166667	0	#DIV/0!	0.0488906	0
A2AKE7	Actin-like protein 10 OS=Mus musculus GN=Actl10 PE=3 SV=1	ACL10_MOUSE	Actl10	0	0	1	0	0	0	0	0	0	0	0	0	0	0	0	1	0	0	0	0	0	0	0	0	0.0353208	0	1	0.166667	0	#DIV/0!	0.0206995	0
P25118	Tumor necrosis factor receptor superfamily member 1A OS=Mus musculus GN=Tnfrsf1a PE=1 SV=1	TNR1A_MOUSE	Tnfrsf1a Tnfr-1 Tnfr1	0	0	1	0	0	0	0	0	0	0	0	0	0	0	1	0	0	0	0	0	0	0	0	0	0.0751277	0	1	0.166667	0	#DIV/0!	0.0435051	0
P59325	Eukaryotic translation initiation factor 5 OS=Mus musculus GN=Eif5 PE=1 SV=1	IF5_MOUSE	Eif5	0	0	1	0	0	0	0	0	0	0	0	0	0	0	0	0	0	0	0	1	0	0	0	0	6.29554e-05	-0.596	0	0.0068583	0.529	#DIV/0!	0.0421998	-0.119
Q7TT52	Protein phosphatase 1 regulatory subunit 14D OS=Mus musculus GN=Ppp1r14d PE=2 SV=2	PP14D_MOUSE	Ppp1r14d Gbpi	0	0	1	0	0	0	0	0	0	0	0	0	0	0	0	1	0	0	0	0	0	0	0	0	0.0353208	0	1	0.166667	0	#DIV/0!	0.0206995	0
Q80U16	Protein FAM65B OS=Mus musculus GN=Fam65b PE=2 SV=2	FA65B_MOUSE	Fam65b Kiaa0386	0	0	1	0	0	0	0	0	0	0	0	0	0	0	0	0	0	0	0	1	0	0	0	0	6.29554e-05	-0.596	0	0.0068583	0.529	#DIV/0!	0.0421998	-0.119
Q811B3	A disintegrin and metalloproteinase with thrombospondin motifs 12 OS=Mus musculus GN=Adamts12 PE=2 SV=2	ATS12_MOUSE	Adamts12	0	0	1	0	0	0	0	0	0	0	0	0	0	0	0	0	0	1	0	0	0	0	0	0	0.0878733	0	1	0.166667	0	#DIV/0!	0.0507268	0
Q8C147	Dedicator of cytokinesis protein 8 OS=Mus musculus GN=Dock8 PE=1 SV=4	DOCK8_MOUSE	Dock8	0	0	1	0	0	0	0	0	0	0	0	0	0	0	0	1	0	0	0	0	0	0	0	0	0.0353208	0	1	0.166667	0	#DIV/0!	0.0206995	0
Q8K4G1	Isoform 3 of Latent-transforming growth factor beta-binding protein 4 OS=Mus musculus GN=Ltbp4	LTBP4_MOUSE	Ltbp4	0	0	1	0	0	0	0	0	0	0	0	0	0	0	1	0	0	0	0	0	0	0	0	0	0.0751277	0	1	0.166667	0	#DIV/0!	0.0435051	0
Q91W39	Nuclear receptor coactivator 5 OS=Mus musculus GN=Ncoa5 PE=1 SV=1	NCOA5_MOUSE	Ncoa5	0	0	1	0	0	0	0	0	0	0	0	0	0	0	0	0	0	0	0	0	0	1	0	0	6.29554e-05	-0.596	0	0.00214747	0.557	#DIV/0!	0.0528941	-0.594
Q9D855	Cytochrome b-c1 complex subunit 7 OS=Mus musculus GN=Uqcrb PE=1 SV=3	QCR7_MOUSE	Uqcrb	0	0	1	0	0	0	0	0	0	0	0	0	0	0	0	0	1	0	0	0	0	0	0	0	0.0928587	0	1	0.166667	0	#DIV/0!	0.0527713	-0.07
Q9DCX8	Iodotyrosine dehalogenase 1 OS=Mus musculus GN=Iyd PE=1 SV=1	IYD1_MOUSE	Iyd Dehal1	0	0	1	0	0	0	0	0	0	0	0	0	0	0	0	0	0	0	0	1	0	0	0	0	6.29554e-05	-0.596	0	0.0068583	0.529	#DIV/0!	0.0421998	-0.119
O55098	Serine/threonine-protein kinase 10 OS=Mus musculus GN=Stk10 PE=1 SV=2	STK10_MOUSE	Stk10 Lok	0	0	0	1	0	0	0	0	0	0	0	0	0	0	0	0	0	0	0	0	0	0	0	1	0.0244441	-0.673	0	0.000907433	0.569	#DIV/0!	0.0170579	-0.671
P14427	H-2 class I histocompatibility antigen, D-P alpha chain OS=Mus musculus GN=H2-D1 PE=2 SV=1	HA14_MOUSE	H2-D1	0	0	0	1	0	0	0	0	0	0	0	0	0	0	0	1	0	0	0	0	0	0	0	0	0.102006	0	1	0.166667	0	#DIV/0!	0.0609278	0
Q14CH1	Molybdenum cofactor sulfurase OS=Mus musculus GN=Mocos PE=2 SV=1	MOCOS_MOUSE	Mocos	0	0	0	1	0	0	0	0	0	0	0	0	0	0	0	0	0	0	0	0	0	0	1	0	0.0244441	-0.673	0	0.000723373	0.571	#DIV/0!	0.0176351	-0.671
Q3UMR0	Isoform 3 of Ankyrin repeat domain-containing protein 27 OS=Mus musculus GN=Ankrd27	ANR27_MOUSE	Ankrd27 Varp	0	0	0	1	0	0	0	0	0	0	0	0	0	1	0	0	0	0	0	0	0	0	0	0	0.0826434	0	1	0.166667	0	#DIV/0!	0.0489115	-0.058
Q5Y5T2	Palmitoyltransferase ZDHHC18 OS=Mus musculus GN=Zdhhc18 PE=1 SV=4	ZDH18_MOUSE	Zdhhc18	0	0	0	1	0	0	0	0	0	0	0	0	0	0	0	0	0	0	0	0	1	0	0	0	0.0244441	-0.673	0	0.00586536	0.534	#DIV/0!	0.00984427	-0.671
Q61554	Fibrillin-1 OS=Mus musculus GN=Fbn1 PE=1 SV=1	FBN1_MOUSE	Fbn1 Fbn-1	0	0	0	1	0	0	0	0	0	0	0	0	0	1	0	0	0	0	0	0	0	0	0	0	0.0826434	0	1	0.166667	0	#DIV/0!	0.0489115	-0.058
Q7TPW1	Nexilin OS=Mus musculus GN=Nexn PE=2 SV=3	NEXN_MOUSE	Nexn	0	0	0	1	0	0	0	0	0	0	0	0	1	0	0	0	0	0	0	0	0	0	0	0	0.0697905	0	1	0.166667	0	#DIV/0!	0.0411646	-0.087
Q8BFU0	R-spondin-2 OS=Mus musculus GN=Rspo2 PE=1 SV=1	RSPO2_MOUSE	Rspo2	0	0	0	1	0	0	0	0	0	0	0	0	0	0	0	0	0	0	0	0	0	1	0	0	0.0244441	-0.673	0	0.00214747	0.557	#DIV/0!	0.0143083	-0.671
Q8BI99	Zinc finger protein 879 OS=Mus musculus GN=Znf879 PE=2 SV=1	ZN879_MOUSE	Znf879 Zfp879	0	0	0	1	0	0	0	0	0	0	0	0	0	0	0	0	0	0	0	0	1	0	0	0	0.0244441	-0.673	0	0.00586536	0.534	#DIV/0!	0.00984427	-0.671
Q8BK63	Isoform 2 of Casein kinase I isoform alpha OS=Mus musculus GN=Csnk1a1	KC1A_MOUSE	Csnk1a1	0	0	0	1	0	0	0	0	0	0	0	0	0	0	0	0	0	0	0	0	1	0	0	0	0.0244441	-0.673	0	0.00586536	0.534	#DIV/0!	0.00984427	-0.671
Q8BKS9	Pumilio domain-containing protein KIAA0020 OS=Mus musculus GN=Kiaa0020 PE=1 SV=2	K0020_MOUSE	Kiaa0020 D19Bwg1357e	0	0	0	1	0	0	0	0	0	0	0	0	0	0	1	0	0	0	0	0	0	0	0	0	0.0752942	0	1	0.166667	0	#DIV/0!	0.0444772	-0.075
Q8C0C0	Zinc fingers and homeoboxes protein 2 OS=Mus musculus GN=Zhx2 PE=1 SV=1	ZHX2_MOUSE	Zhx2 Afr1 Raf	0	0	0	1	0	0	0	0	0	0	0	0	0	1	0	0	0	0	0	0	0	0	0	0	0.0826434	0	1	0.166667	0	#DIV/0!	0.0489115	-0.058
Q8CH02	SURP and G-patch domain-containing protein 1 OS=Mus musculus GN=Sugp1 PE=1 SV=1	SUGP1_MOUSE	Sugp1 Sf4	0	0	0	1	0	0	0	0	0	0	0	0	0	0	1	0	0	0	0	0	0	0	0	0	0.0752942	0	1	0.166667	0	#DIV/0!	0.0444772	-0.075
Q8R420	ATP-binding cassette sub-family A member 3 OS=Mus musculus GN=Abca3 PE=2 SV=3	ABCA3_MOUSE	Abca3	0	0	0	1	0	0	0	0	0	0	0	0	0	0	0	0	0	0	1	0	0	0	0	0	0.0244441	-0.673	0	0.00913921	0.643	#DIV/0!	0.0470846	-0.065
Q91XD2	LIM and senescent cell antigen-like-containing domain protein 2 OS=Mus musculus GN=Lims2 PE=1 SV=1	LIMS2_MOUSE	Lims2 Pinch2	0	0	0	1	0	0	0	0	0	0	0	0	0	0	0	0	0	0	0	0	0	0	0	1	0.0244441	-0.673	0	0.000907433	0.569	#DIV/0!	0.0170579	-0.671
Q921M4	Isoform 2 of Golgin subfamily A member 2 OS=Mus musculus GN=Golga2	GOGA2_MOUSE	Golga2	0	0	0	1	0	0	0	0	0	0	0	0	0	0	1	0	0	0	0	0	0	0	0	0	0.0752942	0	1	0.166667	0	#DIV/0!	0.0444772	-0.075
Q9JJT9	Phosphorylated adapter RNA export protein OS=Mus musculus GN=Phax PE=1 SV=1	PHAX_MOUSE	Phax Rnuxa	0	0	0	1	0	0	0	0	0	0	0	0	0	0	0	0	0	0	0	0	0	0	1	0	0.0244441	-0.673	0	0.000723373	0.571	#DIV/0!	0.0176351	-0.671
A2AIV2	Protein virilizer homolog OS=Mus musculus GN=Kiaa1429 PE=1 SV=1	VIR_MOUSE	Kiaa1429	0	0	0	0	1	0	0	0	0	0	0	0	0	0	1	0	0	0	0	0	0	0	0	0	0.0520888	0	1	0.166667	0	#DIV/0!	0.0299505	0
B1AZI6	THO complex subunit 2 OS=Mus musculus GN=Thoc2 PE=1 SV=1	THOC2_MOUSE	Thoc2	0	0	0	0	1	0	0	0	0	0	0	0	0	0	0	0	0	0	0	0	1	0	0	0	0.00196224	-0.561	0	0.00586536	0.534	#DIV/0!	0.0613842	0
O35945	Retinal dehydrogenase 1 OS=Mus musculus GN=Aldh1a1 PE=1 SV=5	AL1A7_MOUSE	Aldh1a7 Aldh-pb	0	0	0	0	1	0	0	0	0	0	0	0	0	1	0	0	0	0	0	0	0	0	0	0	0.0455805	0	1	0.166667	0	#DIV/0!	0.0262637	0
P51670	C-C motif chemokine 9 OS=Mus musculus GN=Ccl9 PE=1 SV=1	CCL9_MOUSE	Ccl9 Mrp2 Scya10 Scya9	0	0	0	0	1	0	0	0	0	0	0	0	0	0	1	0	0	0	0	0	0	0	0	0	0.0520888	0	1	0.166667	0	#DIV/0!	0.0299505	0
P70335	Isoform 2 of Rho-associated protein kinase 1 OS=Mus musculus GN=Rock1	ROCK1_MOUSE	Rock1	0	0	0	0	1	0	0	0	0	0	0	0	0	0	0	0	0	1	0	0	0	0	0	0	0.0627977	0	1	0.166667	0	#DIV/0!	0.0359921	0
Q01405	Protein transport protein Sec23A OS=Mus musculus GN=Sec23a PE=1 SV=2	SC23A_MOUSE	Sec23a Sec23 Sec23r	0	0	0	0	1	0	0	0	0	0	0	0	0	0	0	0	1	0	0	0	0	0	0	0	0.127217	0	1	0.166667	0	#DIV/0!	0.0717492	0
Q3SYK4	Vertnin OS=Mus musculus GN=Vrtn PE=2 SV=1	VRTN_MOUSE	Vrtn	0	0	0	0	1	0	0	0	0	0	0	0	1	0	0	0	0	0	0	0	0	0	0	0	0.0574784	0	1	0.166667	0	#DIV/0!	0.0329949	0
Q7TPM1	Isoform 2 of Protein PRRC2B OS=Mus musculus GN=Prrc2b	PRC2B_MOUSE	Prrc2b Bat2l Bat2l1 Kiaa0515	0	0	0	0	1	0	0	0	0	0	0	0	0	0	1	0	0	0	0	0	0	0	0	0	0.0520888	0	1	0.166667	0	#DIV/0!	0.0299505	0
Q8BM72	Heat shock 70 kDa protein 13 OS=Mus musculus GN=Hspa13 PE=2 SV=1	HSP13_MOUSE	Hspa13 Stch	0	0	0	0	1	0	0	0	0	0	0	0	1	0	0	0	0	0	0	0	0	0	0	0	0.0574784	0	1	0.166667	0	#DIV/0!	0.0329949	0
Q8BRH4	Histone-lysine N-methyltransferase 2C OS=Mus musculus GN=Kmt2c PE=1 SV=2	KMT2C_MOUSE	Kmt2c Mll3	0	0	0	0	1	0	0	0	0	0	0	0	0	0	0	0	0	1	0	0	0	0	0	0	0.0627977	0	1	0.166667	0	#DIV/0!	0.0359921	0
Q8K4T1	Alpha-2,8-sialyltransferase 8F OS=Mus musculus GN=St8sia6 PE=1 SV=1	SIA8F_MOUSE	St8sia6 Siat8f	0	0	0	0	1	0	0	0	0	0	0	0	0	0	1	0	0	0	0	0	0	0	0	0	0.0520888	0	1	0.166667	0	#DIV/0!	0.0299505	0
Q8VHE6	Dynein heavy chain 5, axonemal OS=Mus musculus GN=Dnah5 PE=2 SV=2	DYH5_MOUSE	Dnah5 Dnahc5	0	0	0	0	1	0	0	0	0	0	0	0	0	0	0	1	0	0	0	0	0	0	0	0	0.0201638	0	1	0.166667	0	#DIV/0!	0.0117371	0
Q8VHK9	ATP-dependent RNA helicase DHX36 OS=Mus musculus GN=Dhx36 PE=1 SV=2	DHX36_MOUSE	Dhx36 Ddx36 Kiaa1488 Mlel1	0	0	0	0	1	0	0	0	0	0	0	0	0	0	0	0	0	1	0	0	0	0	0	0	0.0627977	0	1	0.166667	0	#DIV/0!	0.0359921	0
O54828	Isoform 1 of Regulator of G-protein signaling 9 OS=Mus musculus GN=Rgs9	RGS9_MOUSE	Rgs9	0	0	0	0	0	1	0	0	0	0	0	0	0	0	0	0	0	0	0	0	0	0	1	0	0.00715955	-0.64	0	0.000723373	0.571	#DIV/0!	0.0347835	-0.637
P18052	Isoform 2 of Receptor-type tyrosine-protein phosphatase alpha OS=Mus musculus GN=Ptpra	PTPRA_MOUSE	Ptpra Lrp Ptpa	0	0	0	0	0	1	0	0	0	0	0	0	1	0	0	0	0	0	0	0	0	0	0	0	0.112673	0	1	0.166667	0	#DIV/0!	0.0658222	0
P35487	Pyruvate dehydrogenase E1 component subunit alpha, testis-specific form, mitochondrial OS=Mus musculus GN=Pdha2 PE=2 SV=1	ODPAT_MOUSE	Pdha2 Pdha-2 Pdhal	0	0	0	0	0	1	0	0	0	0	0	0	0	0	0	0	0	0	0	1	0	0	0	0	0.00715955	-0.64	0	0.0068583	0.529	#DIV/0!	0.0221276	-0.206
P70166	Cytoplasmic polyadenylation element-binding protein 1 OS=Mus musculus GN=Cpeb1 PE=1 SV=1	CPEB1_MOUSE	Cpeb1 Cpeb	0	0	0	0	0	1	0	0	0	0	0	0	0	0	0	0	0	0	0	0	0	1	0	0	0.00715955	-0.64	0	0.00214747	0.557	#DIV/0!	0.0300429	-0.637
Q5DU02	Ubiquitin carboxyl-terminal hydrolase 22 OS=Mus musculus GN=Usp22 PE=2 SV=2	UBP22_MOUSE	Usp22 Kiaa1063	0	0	0	0	0	1	0	0	0	0	0	0	0	0	0	1	0	0	0	0	0	0	0	0	0.0653753	0	1	0.166667	0	#DIV/0!	0.0386929	0
Q7SIG6	Isoform 2 of Arf-GAP with SH3 domain, ANK repeat and PH domain-containing protein 2 OS=Mus musculus GN=Asap2	ASAP2_MOUSE	Asap2 Ddef2 Gm1523 Gm592	0	0	0	0	0	1	0	0	0	0	0	0	0	0	0	0	0	0	0	0	1	0	0	0	0.00715955	-0.64	0	0.00586536	0.534	#DIV/0!	0.02339	-0.637
Q80UZ2	Isoform 2 of Protein SDA1 homolog OS=Mus musculus GN=Sdad1	SDA1_MOUSE	Sdad1	0	0	0	0	0	1	0	0	0	0	0	0	0	1	0	0	0	0	0	0	0	0	0	0	0.106938	0	1	0.166667	0	#DIV/0!	0.0626921	0
Q8C5W4	Isoform 2 of MORC family CW-type zinc finger protein 2B OS=Mus musculus GN=Morc2b	MOR2B_MOUSE	Morc2b Tce6	0	0	0	0	0	1	0	0	0	0	0	0	0	0	0	0	0	0	0	1	0	0	0	0	0.00715955	-0.64	0	0.0068583	0.529	#DIV/0!	0.0221276	-0.206
Q8CHG5	Apoptosis-resistant E3 ubiquitin protein ligase 1 OS=Mus musculus GN=Arel1 PE=2 SV=2	AREL1_MOUSE	Arel1 Kiaa0317	0	0	0	0	0	1	0	0	0	0	0	0	0	0	0	0	0	0	0	0	1	0	0	0	0.00715955	-0.64	0	0.00586536	0.534	#DIV/0!	0.02339	-0.637
Q8K4Q0	Isoform 4 of Regulatory-associated protein of mTOR OS=Mus musculus GN=Rptor	RPTOR_MOUSE	Rptor Raptor	0	0	0	0	0	1	0	0	0	0	0	0	0	0	0	0	0	0	0	0	1	0	0	0	0.00715955	-0.64	0	0.00586536	0.534	#DIV/0!	0.02339	-0.637
Q8VHN7	Isoform 2 of G-protein coupled receptor 98 OS=Mus musculus GN=Gpr98	GPR98_MOUSE	Gpr98 Kiaa0686 Mass1 Vlgr1	0	0	0	0	0	1	0	0	0	0	0	0	0	0	0	0	0	0	0	0	1	0	0	0	0.00715955	-0.64	0	0.00586536	0.534	#DIV/0!	0.02339	-0.637
Q921R4	DnaJ homolog subfamily C member 14 OS=Mus musculus GN=Dnajc14 PE=2 SV=2	DJC14_MOUSE	Dnajc14	0	0	0	0	0	1	0	0	0	0	0	0	0	0	0	0	0	0	0	1	0	0	0	0	0.00715955	-0.64	0	0.0068583	0.529	#DIV/0!	0.0221276	-0.206
Q9DBP5	UMP-CMP kinase OS=Mus musculus GN=Cmpk1 PE=1 SV=1	KCY_MOUSE	Cmpk1 Cmk Cmpk Uck Umk Umpk	0	0	0	0	0	1	0	0	0	0	0	0	1	0	0	0	0	0	0	0	0	0	0	0	0.112673	0	1	0.166667	0	#DIV/0!	0.0658222	0
Q9QXH4	Integrin alpha-X OS=Mus musculus GN=Itgax PE=2 SV=1	ITAX_MOUSE	Itgax	0	0	0	0	0	1	0	0	0	0	0	0	0	0	0	1	0	0	0	0	0	0	0	0	0.0653753	0	1	0.166667	0	#DIV/0!	0.0386929	0
Q9QZE5	Coatomer subunit gamma-1 OS=Mus musculus GN=Copg1 PE=2 SV=1	COPG1_MOUSE	Copg1 Copg	0	0	0	0	0	1	0	0	0	0	0	0	0	0	0	0	1	0	0	0	0	0	0	0	0.0521223	-0.159	1	0.166667	0	#DIV/0!	0.0299503	-0.159
O08638	Isoform 2 of Myosin-11 OS=Mus musculus GN=Myh11	MYH11_MOUSE	Myh11	0	0	0	0	0	0	1	0	0	0	0	0	0	0	0	0	0	0	0	0	0	1	0	0	0.166667	0	#DIV/0!	0.088738	-0.079	1	0.0504852	-0.598
O08970	Isoform 2 of Tuftelin OS=Mus musculus GN=Tuft1	TUFT1_MOUSE	Tuft1	0	0	0	0	0	0	1	0	0	0	0	0	0	0	0	0	1	0	0	0	0	0	0	0	0.00218426	0.559	#DIV/0!	0.000229531	-0.598	0	0.0503652	-0.079
P33896	Interferon alpha/beta receptor 1 OS=Mus musculus GN=Ifnar1 PE=1 SV=2	INAR1_MOUSE	Ifnar1 Ifar Ifnar	0	0	0	0	0	0	1	0	0	0	0	0	0	0	0	0	0	0	0	0	0	0	0	1	0.166667	0	#DIV/0!	0.0973973	-0.057	1	0.0555389	-0.598
P55200	Isoform 2 of Histone-lysine N-methyltransferase 2A OS=Mus musculus GN=Kmt2a	KMT2A_MOUSE	Kmt2a All1 Hrx Mll Mll1	0	0	0	0	0	0	1	0	0	0	0	0	0	0	0	0	0	1	0	0	0	0	0	0	0.00414868	0.629	#DIV/0!	0.000229531	-0.598	0	0.0529738	0
Q09014	Neutrophil cytosol factor 1 OS=Mus musculus GN=Ncf1 PE=2 SV=3	NCF1_MOUSE	Ncf1	0	0	0	0	0	0	1	0	0	0	0	0	0	0	0	1	0	0	0	0	0	0	0	0	0.0299725	0.681	#DIV/0!	0.000229531	-0.598	0	0.0221448	0
Q504N7	Pyrin and HIN domain-containing protein 1 OS=Mus musculus GN=Pyhin1 PE=2 SV=1	IFIXL_MOUSE	0	0	0	0	0	0	0	1	0	0	0	0	0	0	0	0	0	0	0	1	0	0	0	0	0	0.166667	0	#DIV/0!	0.0738214	0.093	1	0.0428425	0
Q6PZE0	Mucin-19 OS=Mus musculus GN=Muc19 PE=2 SV=2	MUC19_MOUSE	Muc19	0	0	0	0	0	0	1	0	0	0	0	0	0	0	0	0	0	0	0	0	1	0	0	0	0.166667	0	#DIV/0!	0.0736856	-0.119	1	0.0417421	-0.598
Q91ZE5	EGF-like module-containing mucin-like hormone receptor-like 4 OS=Mus musculus GN=Emr4 PE=1 SV=1	AGRE4_MOUSE	Adgre4 Emr4	0	0	0	0	0	0	1	0	0	0	0	0	0	0	0	0	1	0	0	0	0	0	0	0	0.00218426	0.559	#DIV/0!	0.000229531	-0.598	0	0.0503652	-0.079
Q9CXF7	Isoform 2 of Chromodomain-helicase-DNA-binding protein 1-like OS=Mus musculus GN=Chd1l	CHD1L_MOUSE	Chd1l	0	0	0	0	0	0	1	0	0	0	0	0	0	0	0	0	0	0	0	1	0	0	0	0	0.166667	0	#DIV/0!	0.0707622	-0.128	1	0.0400506	-0.128
Q9D824	Isoform 3 of Pre-mRNA 3'-end-processing factor FIP1 OS=Mus musculus GN=Fip1l1	FIP1_MOUSE	Fip1l1	0	0	0	0	0	0	1	0	0	0	0	0	0	0	0	0	0	0	0	0	0	1	0	0	0.166667	0	#DIV/0!	0.088738	-0.079	1	0.0504852	-0.598
Q9R1Q8	Transgelin-2 OS=Mus musculus GN=Tagln2 PE=1 SV=4	TAGL3_MOUSE	Tagln3 Np25	0	0	0	0	0	0	1	0	0	0	0	0	0	0	0	0	0	0	1	0	0	0	0	0	0.166667	0	#DIV/0!	0.0738214	0.093	1	0.0428425	0
A2AVA0	Sushi, von Willebrand factor type A, EGF and pentraxin domain-containing protein 1 OS=Mus musculus GN=Svep1 PE=1 SV=1	SVEP1_MOUSE	Svep1	0	0	0	0	0	0	0	1	0	0	0	0	0	0	0	0	1	0	0	0	0	0	0	0	0.00218426	0.559	#DIV/0!	0.0128422	-0.503	0	0.0506032	0
O70230	Isoform 3 of Zinc finger protein 143 OS=Mus musculus GN=Znf143	ZN143_MOUSE	Znf143 Staf Zfp143	0	0	0	0	0	0	0	1	0	0	0	0	0	0	0	0	0	0	0	0	0	0	0	1	0.166667	0	#DIV/0!	0.0809516	0.115	1	0.0453092	-0.503
P16054	Ubiquitin carboxyl-terminal hydrolase 8 OS=Mus musculus GN=Usp8 PE=1 SV=2	KPCE_MOUSE	Prkce Pkce Pkcea	0	0	0	0	0	0	0	1	0	0	0	0	0	0	0	0	0	0	0	1	0	0	0	0	0.166667	0	#DIV/0!	0.113541	0.044	1	0.0630437	0
P45481	CREB-binding protein OS=Mus musculus GN=Crebbp PE=1 SV=3	CBP_MOUSE	Crebbp Cbp	0	0	0	0	0	0	0	1	0	0	0	0	0	0	0	0	0	0	0	0	0	0	1	0	0.166667	0	#DIV/0!	0.0791325	0.119	1	0.0443126	-0.503
P58281	Isoform 2 of Dynamin-like 120 kDa protein, mitochondrial OS=Mus musculus GN=Opa1	OPA1_MOUSE	Opa1	0	0	0	0	0	0	0	1	0	0	0	0	0	0	0	1	0	0	0	0	0	0	0	0	0.0299725	0.681	#DIV/0!	0.0128422	-0.503	0	0.00383677	0.329
Q3V1H3	Hephaestin-like protein 1 OS=Mus musculus GN=Hephl1 PE=2 SV=2	HPHL1_MOUSE	Hephl1 Gm509	0	0	0	0	0	0	0	1	0	0	0	0	0	0	0	0	0	1	0	0	0	0	0	0	0.00414868	0.629	#DIV/0!	0.0128422	-0.503	0	0.0205478	0
Q5DQR4	Isoform 5 of Syntaxin-binding protein 5-like OS=Mus musculus GN=Stxbp5l	STB5L_MOUSE	Stxbp5l Llgl4	0	0	0	0	0	0	0	1	0	0	0	0	0	0	0	0	0	0	1	0	0	0	0	0	0.166667	0	#DIV/0!	0.025312	0.257	1	0.0144361	0
Q61592	Growth arrest-specific protein 6 OS=Mus musculus GN=Gas6 PE=2 SV=2	GAS6_MOUSE	Gas6	0	0	0	0	0	0	0	1	0	0	0	0	0	0	0	0	0	0	1	0	0	0	0	0	0.166667	0	#DIV/0!	0.025312	0.257	1	0.0144361	0
Q61923	Potassium voltage-gated channel subfamily A member 6 OS=Mus musculus GN=Kcna6 PE=2 SV=1	KCNA6_MOUSE	Kcna6	0	0	0	0	0	0	0	1	0	0	0	0	0	0	0	0	0	0	0	1	0	0	0	0	0.166667	0	#DIV/0!	0.113541	0.044	1	0.0630437	0
Q80WE4	Isoform 4 of Kinesin-like protein KIF20B OS=Mus musculus GN=Kif20b	KI20B_MOUSE	Kif20b Mphosph1	0	0	0	0	0	0	0	1	0	0	0	0	1	0	0	0	0	0	0	0	0	0	0	0	0.00566811	0.635	#DIV/0!	0.0128422	-0.503	0	0.0182982	0
Q8BZX4	Isoform 2 of Splicing regulatory glutamine/lysine-rich protein 1 OS=Mus musculus GN=Srek1	SREK1_MOUSE	Srek1 Sfrs12 Srrp86	0	0	0	0	0	0	0	1	0	0	0	0	1	0	0	0	0	0	0	0	0	0	0	0	0.00566811	0.635	#DIV/0!	0.0128422	-0.503	0	0.0182982	0
Q8C3J5	Dedicator of cytokinesis protein 2 OS=Mus musculus GN=Dock2 PE=1 SV=3	DOCK2_MOUSE	Dock2	0	0	0	0	0	0	0	1	0	0	0	0	0	0	0	0	0	0	0	1	0	0	0	0	0.166667	0	#DIV/0!	0.113541	0.044	1	0.0630437	0
Q99PE8	ATP-binding cassette sub-family G member 5 OS=Mus musculus GN=Abcg5 PE=2 SV=1	ABCG5_MOUSE	Abcg5	0	0	0	0	0	0	0	1	0	0	0	0	0	0	0	0	0	0	0	0	0	0	0	1	0.166667	0	#DIV/0!	0.0809516	0.115	1	0.0453092	-0.503
D3Z0R2	Protein phosphatase 1 regulatory subunit 36 OS=Mus musculus GN=Ppp1r36 PE=3 SV=1	PPR36_MOUSE	Ppp1r36 Gm70	0	0	0	0	0	0	0	0	1	0	0	0	0	0	0	1	0	0	0	0	0	0	0	0	0.0299725	0.681	#DIV/0!	0.013572	-0.5	0	0.00357877	0.333
P54822	Adenylosuccinate lyase OS=Mus musculus GN=Adsl PE=2 SV=2	PUR8_MOUSE	Adsl Adl	0	0	0	0	0	0	0	0	1	0	0	0	0	0	1	0	0	0	0	0	0	0	0	0	0.00753942	0.641	#DIV/0!	0.013572	-0.5	0	0.0155169	0
Q60520	Isoform 2 of Paired amphipathic helix protein Sin3a OS=Mus musculus GN=Sin3a	SIN3A_MOUSE	Sin3a Kiaa4126	0	0	0	0	0	0	0	0	1	0	0	0	0	1	0	0	0	0	0	0	0	0	0	0	0.0103208	0.648	#DIV/0!	0.013572	-0.5	0	0.0128961	0.635
Q6B8I0	Dual specificity protein phosphatase 13 isoform A OS=Mus musculus GN=Dusp13 PE=2 SV=1	DS13A_MOUSE	Dusp13 Dusp13a Mdsp	0	0	0	0	0	0	0	0	1	0	0	0	0	0	0	0	0	0	0	0	0	1	0	0	0.166667	0	#DIV/0!	0.0887475	0.099	1	0.0495277	-0.5
Q7M6Y6	Maestro heat-like repeat-containing protein family member 2B OS=Mus musculus GN=Mroh2b PE=2 SV=2	MRO2B_MOUSE	Mroh2b Heatr7b2	0	0	0	0	0	0	0	0	1	0	0	0	0	0	0	0	1	0	0	0	0	0	0	0	0.00218426	0.559	#DIV/0!	0.013572	-0.5	0	0.0496556	0
Q8BMN3	Isoform 2 of Neuronal acetylcholine receptor subunit beta-3 OS=Mus musculus GN=Chrnb3	ACHB3_MOUSE	Chrnb3	0	0	0	0	0	0	0	0	1	0	0	0	0	0	0	0	0	0	0	0	0	0	0	1	0.166667	0	#DIV/0!	0.0793867	0.12	1	0.0444126	-0.5
Q8BPM0	Isoform 3 of Disheveled-associated activator of morphogenesis 1 OS=Mus musculus GN=Daam1	DAAM1_MOUSE	Daam1	0	0	0	0	0	0	0	0	1	0	0	0	0	0	0	0	0	0	0	0	0	1	0	0	0.166667	0	#DIV/0!	0.0887475	0.099	1	0.0495277	-0.5
Q8BTF7	DNA ligase 4 OS=Mus musculus GN=Lig4 PE=2 SV=2	DNLI4_MOUSE	Lig4	0	0	0	0	0	0	0	0	1	0	0	0	0	0	0	0	0	0	0	0	1	0	0	0	0.166667	0	#DIV/0!	0.107586	0.058	1	0.0597656	-0.5
Q8QZR5	Alanine aminotransferase 1 OS=Mus musculus GN=Gpt PE=2 SV=3	ALAT1_MOUSE	Gpt Gpt1	0	0	0	0	0	0	0	0	1	0	0	0	0	0	0	0	0	0	1	0	0	0	0	0	0.166667	0	#DIV/0!	0.024438	0.262	1	0.0139316	0
Q99PP9	Isoform 2 of Tripartite motif-containing protein 16 OS=Mus musculus GN=Trim16	TRI16_MOUSE	Trim16 Ebbp	0	0	0	0	0	0	0	0	1	0	0	0	0	0	0	0	0	0	0	0	0	0	1	0	0.166667	0	#DIV/0!	0.0775852	0.124	1	0.0434259	-0.5
Q9CS72	Filamin-A-interacting protein 1 OS=Mus musculus GN=Filip1 PE=1 SV=2	FLIP1_MOUSE	Filip1	0	0	0	0	0	0	0	0	1	0	0	0	0	0	0	0	0	0	0	0	1	0	0	0	0.166667	0	#DIV/0!	0.107586	0.058	1	0.0597656	-0.5
Q9D6P8	Calmodulin-like protein 3 OS=Mus musculus GN=Calml3 PE=2 SV=1	CALL3_MOUSE	Calml3	0	0	0	0	0	0	0	0	1	0	0	0	0	0	0	0	0	0	0	0	1	0	0	0	0.166667	0	#DIV/0!	0.107586	0.058	1	0.0597656	-0.5
Q9WVK4	EH domain-containing protein 1 OS=Mus musculus GN=Ehd1 PE=1 SV=1	EHD1_MOUSE	Ehd1 Past1	0	0	0	0	0	0	0	0	1	0	0	0	0	1	0	0	0	0	0	0	0	0	0	0	0.0103208	0.648	#DIV/0!	0.013572	-0.5	0	0.0128961	0.635
P0C605	Isoform Beta of cGMP-dependent protein kinase 1 OS=Mus musculus GN=Prkg1	KGP1_MOUSE	Prkg1 Prkg1b Prkgr1a Prkgr1b	0	0	0	0	0	0	0	0	0	1	0	0	0	1	0	0	0	0	0	0	0	0	0	0	0.0103208	0.648	#DIV/0!	0.00361423	-0.547	0	0.0229139	0
P36895	Bone morphogenetic protein receptor type-1A OS=Mus musculus GN=Bmpr1a PE=2 SV=1	BMR1A_MOUSE	Bmpr1a Acvrlk3 Bmpr	0	0	0	0	0	0	0	0	0	1	0	0	0	0	0	0	0	0	0	0	0	0	1	0	0.166667	0	#DIV/0!	0.10738	0.044	1	0.0605978	-0.547
P57776	Isoform 3 of Elongation factor 1-delta OS=Mus musculus GN=Eef1d	EF1D_MOUSE	Eef1d	0	0	0	0	0	0	0	0	0	1	0	0	0	0	0	0	0	0	0	1	0	0	0	0	0.166667	0	#DIV/0!	0.116235	-0.032	1	0.0650566	0
Q3UHA3	Spatacsin OS=Mus musculus GN=Spg11 PE=2 SV=3	SPTCS_MOUSE	Spg11 Kiaa1840	0	0	0	0	0	0	0	0	0	1	0	0	0	0	0	0	0	0	0	0	0	0	0	1	0.166667	0	#DIV/0!	0.109494	0.04	1	0.0617618	-0.547
Q5DU09	Isoform 2 of Zinc finger protein 652 OS=Mus musculus GN=Znf652	ZN652_MOUSE	Znf652 Kiaa0924 Zfp652	0	0	0	0	0	0	0	0	0	1	0	0	0	0	0	0	0	0	0	0	0	0	1	0	0.166667	0	#DIV/0!	0.10738	0.044	1	0.0605978	-0.547
Q80VY9	Putative ATP-dependent RNA helicase DHX33 OS=Mus musculus GN=Dhx33 PE=1 SV=1	DHX33_MOUSE	Dhx33	0	0	0	0	0	0	0	0	0	1	0	0	0	0	0	0	0	0	0	0	0	0	1	0	0.166667	0	#DIV/0!	0.10738	0.044	1	0.0605978	-0.547
Q8C1B1	Isoform 2 of Calmodulin-regulated spectrin-associated protein 2 OS=Mus musculus GN=Camsap2	CAMP2_MOUSE	Camsap2 Camsap1l1 Kiaa1078	0	0	0	0	0	0	0	0	0	1	0	0	0	0	0	0	0	0	1	0	0	0	0	0	0.166667	0	#DIV/0!	0.0422768	0.187	1	0.024287	0.541
Q8CBY3	Leukocyte receptor cluster member 8 homolog OS=Mus musculus GN=Leng8 PE=1 SV=1	LENG8_MOUSE	Leng8	0	0	0	0	0	0	0	0	0	1	0	0	0	0	0	0	0	0	0	0	1	0	0	0	0.166667	0	#DIV/0!	0.119965	-0.023	1	0.0672062	-0.547
Q8R0S2	Isoform 2 of IQ motif and SEC7 domain-containing protein 1 OS=Mus musculus GN=Iqsec1	IQEC1_MOUSE	Iqsec1 Kiaa0763	0	0	0	0	0	0	0	0	0	1	0	0	0	0	0	0	1	0	0	0	0	0	0	0	0.00218426	0.559	#DIV/0!	0.00361423	-0.547	0	0.0679153	0.442
Q8VDR9	Dedicator of cytokinesis protein 6 OS=Mus musculus GN=Dock6 PE=1 SV=4	DOCK6_MOUSE	Dock6 Kiaa1395	0	0	0	0	0	0	0	0	0	1	0	0	0	0	0	0	0	1	0	0	0	0	0	0	0.00414868	0.629	#DIV/0!	0.00361423	-0.547	0	0.0320522	0
Q99PI5	Phosphatidate phosphatase LPIN2 OS=Mus musculus GN=Lpin2 PE=1 SV=2	LPIN2_MOUSE	Lpin2	0	0	0	0	0	0	0	0	0	1	0	0	0	1	0	0	0	0	0	0	0	0	0	0	0.0103208	0.648	#DIV/0!	0.00361423	-0.547	0	0.0229139	0
Q9CW79	Isoform 2 of Golgin subfamily A member 1 OS=Mus musculus GN=Golga1	GOGA1_MOUSE	Golga1	0	0	0	0	0	0	0	0	0	1	0	0	0	0	0	0	0	0	0	0	0	0	0	1	0.166667	0	#DIV/0!	0.109494	0.04	1	0.0617618	-0.547
A2ALU4	Protein Shroom2 OS=Mus musculus GN=Shroom2 PE=1 SV=1	SHRM2_MOUSE	Shroom2 Apxl	0	0	0	0	0	0	0	0	0	0	1	0	0	0	0	0	0	0	0	0	0	0	1	0	0.166667	0	#DIV/0!	0.113253	-0.026	1	0.0644083	0
B2RY56	RNA-binding protein 25 OS=Mus musculus GN=Rbm25 PE=1 SV=2	RBM25_MOUSE	Rbm25	0	0	0	0	0	0	0	0	0	0	1	0	0	0	0	0	0	0	0	1	0	0	0	0	0.166667	0	#DIV/0!	0.0827484	-0.101	1	0.0466844	-0.101
O08550	Histone-lysine N-methyltransferase 2B OS=Mus musculus GN=Kmt2b PE=1 SV=3	KMT2B_MOUSE	Kmt2b Mll2 Trx2 Wbp7	0	0	0	0	0	0	0	0	0	0	1	0	0	0	0	0	0	0	0	0	0	0	0	1	0.166667	0	#DIV/0!	0.111359	-0.03	1	0.0633022	0
P19246	Neurofilament heavy polypeptide OS=Mus musculus GN=Nefh PE=1 SV=3	NFH_MOUSE	Nefh Kiaa0845 Nfh	0	0	0	0	0	0	0	0	0	0	1	0	1	0	0	0	0	0	0	0	0	0	0	0	0.00566811	0.635	#DIV/0!	4.33116e-05	-0.585	0	0.0429536	0
Q3U2P1	Isoform 2 of Protein transport protein Sec24A OS=Mus musculus GN=Sec24a	SC24A_MOUSE	Sec24a	0	0	0	0	0	0	0	0	0	0	1	0	0	0	0	0	0	0	0	0	0	0	0	1	0.166667	0	#DIV/0!	0.111359	-0.03	1	0.0633022	0
Q58A65	Isoform 1e of C-Jun-amino-terminal kinase-interacting protein 3 OS=Mus musculus GN=Mapk8ip3	JIP4_MOUSE	Spag9 Jip4 Jsap2 Kiaa0516 Mapk8ip4	0	0	0	0	0	0	0	0	0	0	1	0	0	0	0	0	0	0	0	0	0	0	0	1	0.166667	0	#DIV/0!	0.111359	-0.03	1	0.0633022	0
Q6P1Y8	Type II inositol 3,4-bisphosphate 4-phosphatase OS=Mus musculus GN=Inpp4b PE=2 SV=1	INP4B_MOUSE	Inpp4b	0	0	0	0	0	0	0	0	0	0	1	0	0	0	0	1	0	0	0	0	0	0	0	0	0.0299725	0.681	#DIV/0!	4.33116e-05	-0.585	0	0.0179455	0
Q6X786	Isoform 3 of Zona pellucida-binding protein 2 OS=Mus musculus GN=Zpbp2	ZPBP2_MOUSE	Zpbp2	0	0	0	0	0	0	0	0	0	0	1	0	1	0	0	0	0	0	0	0	0	0	0	0	0.00566811	0.635	#DIV/0!	4.33116e-05	-0.585	0	0.0429536	0
Q7TMY8	Isoform 4 of E3 ubiquitin-protein ligase HUWE1 OS=Mus musculus GN=Huwe1	HUWE1_MOUSE	Huwe1 Kiaa0312 Ureb1	0	0	0	0	0	0	0	0	0	0	1	0	0	0	0	0	0	0	0	0	0	0	0	1	0.166667	0	#DIV/0!	0.111359	-0.03	1	0.0633022	0
Q80XC6	Protein NRDE2 homolog OS=Mus musculus GN=Nrde2 PE=2 SV=3	NRDE2_MOUSE	Nrde2	0	0	0	0	0	0	0	0	0	0	1	0	1	0	0	0	0	0	0	0	0	0	0	0	0.00566811	0.635	#DIV/0!	4.33116e-05	-0.585	0	0.0429536	0
Q80Y17	Lethal(2) giant larvae protein homolog 1 OS=Mus musculus GN=Llgl1 PE=1 SV=1	L2GL1_MOUSE	Llgl1 Llglh	0	0	0	0	0	0	0	0	0	0	1	0	0	0	0	0	0	0	0	1	0	0	0	0	0.166667	0	#DIV/0!	0.0827484	-0.101	1	0.0466844	-0.101
Q811D0	Isoform 3 of Disks large homolog 1 OS=Mus musculus GN=Dlg1	DLG1_MOUSE	Dlg1 Dlgh1	0	0	0	0	0	0	0	0	0	0	1	0	0	1	0	0	0	0	0	0	0	0	0	0	0.0103208	0.648	#DIV/0!	4.33116e-05	-0.585	0	0.0352212	0
Q8BL48	Isoform 2 of RING finger protein unkempt homolog OS=Mus musculus GN=Unk	UNK_MOUSE	Unk Kiaa1753 Zc3h5 Zc3hdc5	0	0	0	0	0	0	0	0	0	0	1	0	0	0	0	0	0	0	0	0	0	1	0	0	0.166667	0	#DIV/0!	0.102092	-0.052	1	0.0578998	0
Q8BLB8	Ankyrin repeat domain-containing protein 34C OS=Mus musculus GN=Ankrd34c PE=2 SV=1	AN34C_MOUSE	Ankrd34c	0	0	0	0	0	0	0	0	0	0	1	0	0	0	0	0	0	0	0	0	0	1	0	0	0.166667	0	#DIV/0!	0.102092	-0.052	1	0.0578998	0
Q8CGC4	Protein LSM14 homolog B OS=Mus musculus GN=Lsm14b PE=2 SV=3	LS14B_MOUSE	Lsm14b Fam61b Rap55b	0	0	0	0	0	0	0	0	0	0	1	0	0	0	0	0	0	0	0	1	0	0	0	0	0.166667	0	#DIV/0!	0.0827484	-0.101	1	0.0466844	-0.101
Q8R2V3	Zinc finger protein 445 OS=Mus musculus GN=Znf445 PE=2 SV=2	ZN445_MOUSE	Znf445 Zfp445	0	0	0	0	0	0	0	0	0	0	1	0	1	0	0	0	0	0	0	0	0	0	0	0	0.00566811	0.635	#DIV/0!	4.33116e-05	-0.585	0	0.0429536	0
Q922Y0	Dual specificity tyrosine-phosphorylation-regulated kinase 3 OS=Mus musculus GN=Dyrk3 PE=1 SV=1	DYRK3_MOUSE	Dyrk3	0	0	0	0	0	0	0	0	0	0	1	0	0	0	0	0	0	0	0	0	0	0	1	0	0.166667	0	#DIV/0!	0.113253	-0.026	1	0.0644083	0
A2AUC9	Kelch-like protein 41 OS=Mus musculus GN=Klhl41 PE=1 SV=1	KLH41_MOUSE	Klhl41 Kbtbd10	0	0	0	0	0	0	0	0	0	0	0	1	0	0	0	1	0	0	0	0	0	0	0	0	0.0299725	0.681	#DIV/0!	8.22406e-06	-0.587	0	0.0186306	0
E9Q5F9	Isoform 2 of Histone-lysine N-methyltransferase SETD2 OS=Mus musculus GN=Setd2	SETD2_MOUSE	Setd2 Kiaa1732 Kmt3a	0	0	0	0	0	0	0	0	0	0	0	1	0	0	1	0	0	0	0	0	0	0	0	0	0.00753942	0.641	#DIV/0!	8.22406e-06	-0.587	0	0.0404829	0
O88444	Adenylate cyclase type 1 OS=Mus musculus GN=Adcy1 PE=2 SV=2	ADCY1_MOUSE	Adcy1	0	0	0	0	0	0	0	0	0	0	0	1	0	0	0	0	0	0	0	0	0	0	0	1	0.166667	0	#DIV/0!	0.108908	-0.035	1	0.0619419	-0.587
P33680	Guanylin OS=Mus musculus GN=Guca2a PE=2 SV=1	GUC2A_MOUSE	Guca2a Guca2	0	0	0	0	0	0	0	0	0	0	0	1	0	0	0	0	0	0	0	0	0	0	0	1	0.166667	0	#DIV/0!	0.108908	-0.035	1	0.0619419	-0.587
Q09XV5	Chromodomain-helicase-DNA-binding protein 8 OS=Mus musculus GN=Chd8 PE=1 SV=1	CHD8_MOUSE	Chd8 Kiaa1564	0	0	0	0	0	0	0	0	0	0	0	1	1	0	0	0	0	0	0	0	0	0	0	0	0.00566811	0.635	#DIV/0!	8.22406e-06	-0.587	0	0.0440093	0
Q148W0	Phospholipid-transporting ATPase IC OS=Mus musculus GN=Atp8b1 PE=1 SV=2	AT8B1_MOUSE	Atp8b1	0	0	0	0	0	0	0	0	0	0	0	1	0	0	0	0	0	0	1	0	0	0	0	0	0.166667	0	#DIV/0!	0.0654597	0.115	1	0.0378977	0
Q3UGP8	Putative Dol-P-Glc:Glc(2)Man(9)GlcNAc(2)-PP-Dol alpha-1,2-glucosyltransferase OS=Mus musculus GN=Alg10b PE=2 SV=1	AG10B_MOUSE	Alg10b	0	0	0	0	0	0	0	0	0	0	0	1	0	0	0	0	0	0	1	0	0	0	0	0	0.166667	0	#DIV/0!	0.0654597	0.115	1	0.0378977	0
Q5I012	Isoform 4 of Putative sodium-coupled neutral amino acid transporter 10 OS=Mus musculus GN=Slc38a10	S38AA_MOUSE	Slc38a10	0	0	0	0	0	0	0	0	0	0	0	1	0	0	0	0	0	0	0	0	0	0	0	1	0.166667	0	#DIV/0!	0.108908	-0.035	1	0.0619419	-0.587
Q61096	Myeloblastin OS=Mus musculus GN=Prtn3 PE=2 SV=2	PRTN3_MOUSE	Prtn3	0	0	0	0	0	0	0	0	0	0	0	1	0	0	0	0	0	0	0	0	0	0	0	1	0.166667	0	#DIV/0!	0.108908	-0.035	1	0.0619419	-0.587
Q61493	DNA polymerase zeta catalytic subunit OS=Mus musculus GN=Rev3l PE=1 SV=3	DPOLZ_MOUSE	Rev3l Polz Sez4	0	0	0	0	0	0	0	0	0	0	0	1	0	0	0	0	0	0	0	0	1	0	0	0	0.166667	0	#DIV/0!	0.0837516	-0.097	1	0.0473186	-0.587
Q6P5F9	Exportin-1 OS=Mus musculus GN=Xpo1 PE=1 SV=1	XPO1_MOUSE	Xpo1 Crm1	0	0	0	0	0	0	0	0	0	0	0	1	0	0	0	0	0	0	0	0	0	0	1	0	0.166667	0	#DIV/0!	0.110781	-0.031	1	0.0630362	-0.587
Q8C0C4	Serine-rich coiled-coil domain-containing protein 1 OS=Mus musculus GN=Ccser1 PE=2 SV=2	CCSE1_MOUSE	Ccser1 Fam190a Kiaa1680	0	0	0	0	0	0	0	0	0	0	0	1	0	0	0	0	0	0	0	0	0	0	1	0	0.166667	0	#DIV/0!	0.110781	-0.031	1	0.0630362	-0.587
Q8CD54	Isoform 2 of Piezo-type mechanosensitive ion channel component 2 OS=Mus musculus GN=Piezo2	PIEZ2_MOUSE	Piezo2 Fam38b	0	0	0	0	0	0	0	0	0	0	0	1	0	0	0	0	0	0	0	0	0	0	0	1	0.166667	0	#DIV/0!	0.108908	-0.035	1	0.0619419	-0.587
Q91VW5	Golgin subfamily A member 4 OS=Mus musculus GN=Golga4 PE=1 SV=2	GOGA4_MOUSE	Golga4	0	0	0	0	0	0	0	0	0	0	0	1	1	0	0	0	0	0	0	0	0	0	0	0	0.00566811	0.635	#DIV/0!	8.22406e-06	-0.587	0	0.0440093	0
Q9R1Z8	Vinexin OS=Mus musculus GN=Sorbs3 PE=1 SV=1	VINEX_MOUSE	Sorbs3 Scam1 Sh3d4	0	0	0	0	0	0	0	0	0	0	0	1	0	0	0	0	0	0	0	1	0	0	0	0	0.166667	0	#DIV/0!	0.0806344	-0.106	1	0.0455167	-0.106
P08905	Lysozyme C-2 OS=Mus musculus GN=Lyz2 PE=1 SV=2	LYZ2_MOUSE	Lyz2 Lyz Lyzs	18	14	18	10	11	6	16	14	13	18	15	13	17	7	14	9	13	9	17	15	17	19	10	10	0.272494	-0.415	0.896104	0.0379641	0.243	0.988764	0.0344857	-0.194
P05017	Isoform IGF-IB of Insulin-like growth factor I OS=Mus musculus GN=Igf1	IGF1_MOUSE	Igf1 Igf-1	5	7	8	6	6	4	17	17	20	20	19	16	5	5	6	4	7	6	16	17	20	15	20	16	0.0326164	-0.568	0.916667	6.66839e-05	0.089	0.954128	0.00221978	-0.069
E9Q1P8	Interferon regulatory factor 2-binding protein-like OS=Mus musculus GN=Irf2bpl PE=1 SV=1	I2BP2_MOUSE	Irf2bp2	1	0	0	0	0	0	0	0	0	0	0	0	0	0	0	0	0	0	0	0	0	0	0	0	0.0176909	-0.663	0	0.166667	0	#DIV/0!	0.00974639	-0.661
O35134	DNA-directed RNA polymerase I subunit RPA1 OS=Mus musculus GN=Polr1a PE=1 SV=2	RPA1_MOUSE	Polr1a Rpa1 Rpo1-4	1	0	0	0	0	0	0	0	0	0	0	0	0	0	0	0	0	0	0	0	0	0	0	0	0.0176909	-0.663	0	0.166667	0	#DIV/0!	0.00974639	-0.661
O88839	Isoform 4 of Disintegrin and metalloproteinase domain-containing protein 15 OS=Mus musculus GN=Adam15	ADA15_MOUSE	Adam15 Mdc15	1	0	0	0	0	0	0	0	0	0	0	0	0	0	0	0	0	0	0	0	0	0	0	0	0.0176909	-0.663	0	0.166667	0	#DIV/0!	0.00974639	-0.661
P01804	Ig heavy chain V-III region HPC76 (Fragment) OS=Mus musculus PE=4 SV=1	HVM35_MOUSE	0	1	0	0	0	0	0	0	0	0	0	0	0	0	0	0	0	0	0	0	0	0	0	0	0	0.0176909	-0.663	0	0.166667	0	#DIV/0!	0.00974639	-0.661
P04426	Proto-oncogene Wnt-1 OS=Mus musculus GN=Wnt1 PE=1 SV=1	WNT1_MOUSE	Wnt1 Int-1 Wnt-1	1	0	0	0	0	0	0	0	0	0	0	0	0	0	0	0	0	0	0	0	0	0	0	0	0.0176909	-0.663	0	0.166667	0	#DIV/0!	0.00974639	-0.661
P16382	Isoform 3 of Interleukin-4 receptor subunit alpha OS=Mus musculus GN=Il4r	IL4RA_MOUSE	Il4r Il4ra	1	0	0	0	0	0	0	0	0	0	0	0	0	0	0	0	0	0	0	0	0	0	0	0	0.0176909	-0.663	0	0.166667	0	#DIV/0!	0.00974639	-0.661
P21995	Embigin OS=Mus musculus GN=Emb PE=1 SV=2	EMB_MOUSE	Emb Gp70	1	0	0	0	0	0	0	0	0	0	0	0	0	0	0	0	0	0	0	0	0	0	0	0	0.0176909	-0.663	0	0.166667	0	#DIV/0!	0.00974639	-0.661
P32067	Lupus La protein homolog OS=Mus musculus GN=Ssb PE=1 SV=1	LA_MOUSE	Ssb Ss-b	1	0	0	0	0	0	0	0	0	0	0	0	0	0	0	0	0	0	0	0	0	0	0	0	0.0176909	-0.663	0	0.166667	0	#DIV/0!	0.00974639	-0.661
P48962	ADP/ATP translocase 2 OS=Mus musculus GN=Slc25a5 PE=1 SV=3	ADT1_MOUSE	Slc25a4 Anc1 Ant1	1	0	0	0	0	0	0	0	0	0	0	0	0	0	0	0	0	0	0	0	0	0	0	0	0.0176909	-0.663	0	0.166667	0	#DIV/0!	0.00974639	-0.661
P49194	Retinol-binding protein 3 OS=Mus musculus GN=Rbp3 PE=2 SV=3	RET3_MOUSE	Rbp3	1	0	0	0	0	0	0	0	0	0	0	0	0	0	0	0	0	0	0	0	0	0	0	0	0.0176909	-0.663	0	0.166667	0	#DIV/0!	0.00974639	-0.661
P59280	Kelch-like protein 8 OS=Mus musculus GN=Klhl8 PE=2 SV=2	KLHL8_MOUSE	Klhl8	1	0	0	0	0	0	0	0	0	0	0	0	0	0	0	0	0	0	0	0	0	0	0	0	0.0176909	-0.663	0	0.166667	0	#DIV/0!	0.00974639	-0.661
P62806	Histone H4 OS=Mus musculus GN=Hist1h4a PE=1 SV=2	H4_MOUSE	Hist1h4a; Hist1h4b H4-53; Hist1h4c H4-12; Hist1h4d; Hist1h4f; Hist1h4h; Hist1h4i; Hist1h4j; Hist1h4k; Hist1h4m; Hist2h4a Hist2h4; Hist4h4	1	0	0	0	0	0	0	0	0	0	0	0	0	0	0	0	0	0	0	0	0	0	0	0	0.0176909	-0.663	0	0.166667	0	#DIV/0!	0.00974639	-0.661
P63001	Ras-related C3 botulinum toxin substrate 2 OS=Mus musculus GN=Rac2 PE=2 SV=1	RAC1_MOUSE	Rac1	1	0	0	0	0	0	0	0	0	0	0	0	0	0	0	0	0	0	0	0	0	0	0	0	0.0176909	-0.663	0	0.166667	0	#DIV/0!	0.00974639	-0.661
P68254	Isoform 2 of 14-3-3 protein theta OS=Mus musculus GN=Ywhaq	1433T_MOUSE	Ywhaq	1	0	0	0	0	0	0	0	0	0	0	0	0	0	0	0	0	0	0	0	0	0	0	0	0.0176909	-0.663	0	0.166667	0	#DIV/0!	0.00974639	-0.661
P99027	60S acidic ribosomal protein P2 OS=Mus musculus GN=Rplp2 PE=1 SV=3	RLA2_MOUSE	Rplp2	1	0	0	0	0	0	0	0	0	0	0	0	0	0	0	0	0	0	0	0	0	0	0	0	0.0176909	-0.663	0	0.166667	0	#DIV/0!	0.00974639	-0.661
Q00PI9	Heterogeneous nuclear ribonucleoprotein U-like protein 2 OS=Mus musculus GN=Hnrnpul2 PE=1 SV=2	HNRL2_MOUSE	Hnrnpul2 Hnrpul2 Manp	1	0	0	0	0	0	0	0	0	0	0	0	0	0	0	0	0	0	0	0	0	0	0	0	0.0176909	-0.663	0	0.166667	0	#DIV/0!	0.00974639	-0.661
Q05860	Isoform 4 of Formin-1 OS=Mus musculus GN=Fmn1	FMN1_MOUSE	Fmn1 Fmn Ld	1	0	0	0	0	0	0	0	0	0	0	0	0	0	0	0	0	0	0	0	0	0	0	0	0.0176909	-0.663	0	0.166667	0	#DIV/0!	0.00974639	-0.661
Q07424	Homeobox protein CDX-4 OS=Mus musculus GN=Cdx4 PE=2 SV=1	CDX4_MOUSE	Cdx4 Cdx-4	1	0	0	0	0	0	0	0	0	0	0	0	0	0	0	0	0	0	0	0	0	0	0	0	0.0176909	-0.663	0	0.166667	0	#DIV/0!	0.00974639	-0.661
Q14DH7	Isoform 2 of Acyl-CoA synthetase short-chain family member 3, mitochondrial OS=Mus musculus GN=Acss3	ACSS3_MOUSE	Acss3	1	0	0	0	0	0	0	0	0	0	0	0	0	0	0	0	0	0	0	0	0	0	0	0	0.0176909	-0.663	0	0.166667	0	#DIV/0!	0.00974639	-0.661
Q3U1J1	Isoform 2 of TCF3 fusion partner homolog OS=Mus musculus GN=Tfpt	TFPT_MOUSE	Tfpt Amida	1	0	0	0	0	0	0	0	0	0	0	0	0	0	0	0	0	0	0	0	0	0	0	0	0.0176909	-0.663	0	0.166667	0	#DIV/0!	0.00974639	-0.661
Q3U5C7	Prickle-like protein 1 OS=Mus musculus GN=Prickle1 PE=2 SV=1	PRIC1_MOUSE	Prickle1	1	0	0	0	0	0	0	0	0	0	0	0	0	0	0	0	0	0	0	0	0	0	0	0	0.0176909	-0.663	0	0.166667	0	#DIV/0!	0.00974639	-0.661
Q3UHD3	Isoform 4 of Microtubule-associated tumor suppressor candidate 2 homolog OS=Mus musculus GN=Mtus2	MTUS2_MOUSE	Mtus2 Cazip Kiaa0774 Tip150	1	0	0	0	0	0	0	0	0	0	0	0	0	0	0	0	0	0	0	0	0	0	0	0	0.0176909	-0.663	0	0.166667	0	#DIV/0!	0.00974639	-0.661
Q3UHF7	Transcription factor HIVEP2 OS=Mus musculus GN=Hivep2 PE=1 SV=1	ZEP2_MOUSE	Hivep2 Mibp1	1	0	0	0	0	0	0	0	0	0	0	0	0	0	0	0	0	0	0	0	0	0	0	0	0.0176909	-0.663	0	0.166667	0	#DIV/0!	0.00974639	-0.661
Q3UKC1	Tax1-binding protein 1 homolog OS=Mus musculus GN=Tax1bp1 PE=1 SV=2	TAXB1_MOUSE	Tax1bp1	1	0	0	0	0	0	0	0	0	0	0	0	0	0	0	0	0	0	0	0	0	0	0	0	0.0176909	-0.663	0	0.166667	0	#DIV/0!	0.00974639	-0.661
Q5GH62	XK-related protein 9 OS=Mus musculus GN=Xkr9 PE=2 SV=1	XKR9_MOUSE	Xkr9 Gm1620 Xrg9	1	0	0	0	0	0	0	0	0	0	0	0	0	0	0	0	0	0	0	0	0	0	0	0	0.0176909	-0.663	0	0.166667	0	#DIV/0!	0.00974639	-0.661
Q5NCR9	Nuclear speckle splicing regulatory protein 1 OS=Mus musculus GN=Nsrp1 PE=1 SV=1	NSRP1_MOUSE	Nsrp1 Ccdc55 Nsrp70	1	0	0	0	0	0	0	0	0	0	0	0	0	0	0	0	0	0	0	0	0	0	0	0	0.0176909	-0.663	0	0.166667	0	#DIV/0!	0.00974639	-0.661
Q60597	Isoform 4 of 2-oxoglutarate dehydrogenase, mitochondrial OS=Mus musculus GN=Ogdh	ODO1_MOUSE	Ogdh Kiaa4192	1	0	0	0	0	0	0	0	0	0	0	0	0	0	0	0	0	0	0	0	0	0	0	0	0.0176909	-0.663	0	0.166667	0	#DIV/0!	0.00974639	-0.661
Q61112	Isoform 2 of 45 kDa calcium-binding protein OS=Mus musculus GN=Sdf4	CAB45_MOUSE	Sdf4 Cab45	1	0	0	0	0	0	0	0	0	0	0	0	0	0	0	0	0	0	0	0	0	0	0	0	0.0176909	-0.663	0	0.166667	0	#DIV/0!	0.00974639	-0.661
Q61239	Protein farnesyltransferase/geranylgeranyltransferase type-1 subunit alpha OS=Mus musculus GN=Fnta PE=1 SV=1	FNTA_MOUSE	Fnta	1	0	0	0	0	0	0	0	0	0	0	0	0	0	0	0	0	0	0	0	0	0	0	0	0.0176909	-0.663	0	0.166667	0	#DIV/0!	0.00974639	-0.661
Q61553	Fascin OS=Mus musculus GN=Fscn1 PE=1 SV=4	FSCN1_MOUSE	Fscn1 Fan1 Snl	1	0	0	0	0	0	0	0	0	0	0	0	0	0	0	0	0	0	0	0	0	0	0	0	0.0176909	-0.663	0	0.166667	0	#DIV/0!	0.00974639	-0.661
Q61559	IgG receptor FcRn large subunit p51 OS=Mus musculus GN=Fcgrt PE=1 SV=1	FCGRN_MOUSE	Fcgrt Fcrn	1	0	0	0	0	0	0	0	0	0	0	0	0	0	0	0	0	0	0	0	0	0	0	0	0.0176909	-0.663	0	0.166667	0	#DIV/0!	0.00974639	-0.661
Q62137	Isoform 2 of Tyrosine-protein kinase JAK3 OS=Mus musculus GN=Jak3	JAK3_MOUSE	Jak3	1	0	0	0	0	0	0	0	0	0	0	0	0	0	0	0	0	0	0	0	0	0	0	0	0.0176909	-0.663	0	0.166667	0	#DIV/0!	0.00974639	-0.661
Q62318	Transcription intermediary factor 1-beta OS=Mus musculus GN=Trim28 PE=1 SV=3	TIF1B_MOUSE	Trim28 Kap1 Krip1 Tif1b	1	0	0	0	0	0	0	0	0	0	0	0	0	0	0	0	0	0	0	0	0	0	0	0	0.0176909	-0.663	0	0.166667	0	#DIV/0!	0.00974639	-0.661
Q6DFV7	Nuclear receptor coactivator 7 OS=Mus musculus GN=Ncoa7 PE=2 SV=2	NCOA7_MOUSE	Ncoa7	1	0	0	0	0	0	0	0	0	0	0	0	0	0	0	0	0	0	0	0	0	0	0	0	0.0176909	-0.663	0	0.166667	0	#DIV/0!	0.00974639	-0.661
Q6P2B1	Isoform 3 of Transportin-3 OS=Mus musculus GN=Tnpo3	TNPO3_MOUSE	Tnpo3	1	0	0	0	0	0	0	0	0	0	0	0	0	0	0	0	0	0	0	0	0	0	0	0	0.0176909	-0.663	0	0.166667	0	#DIV/0!	0.00974639	-0.661
Q704Y3	Isoform 2 of Transient receptor potential cation channel subfamily V member 1 OS=Mus musculus GN=Trpv1	TRPV1_MOUSE	Trpv1	1	0	0	0	0	0	0	0	0	0	0	0	0	0	0	0	0	0	0	0	0	0	0	0	0.0176909	-0.663	0	0.166667	0	#DIV/0!	0.00974639	-0.661
Q80SU3	Zygote arrest protein 1 OS=Mus musculus GN=Zar1 PE=2 SV=1	ZAR1_MOUSE	Zar1	1	0	0	0	0	0	0	0	0	0	0	0	0	0	0	0	0	0	0	0	0	0	0	0	0.0176909	-0.663	0	0.166667	0	#DIV/0!	0.00974639	-0.661
Q812A5	Isoform 2 of Proline-rich protein 5 OS=Mus musculus GN=Prr5	PRR5_MOUSE	Prr5 Protor1	1	0	0	0	0	0	0	0	0	0	0	0	0	0	0	0	0	0	0	0	0	0	0	0	0.0176909	-0.663	0	0.166667	0	#DIV/0!	0.00974639	-0.661
Q8BPC6	Probable isocitrate dehydrogenase [NAD] gamma 2, mitochondrial OS=Mus musculus PE=2 SV=1	IDHG2_MOUSE	0	1	0	0	0	0	0	0	0	0	0	0	0	0	0	0	0	0	0	0	0	0	0	0	0	0.0176909	-0.663	0	0.166667	0	#DIV/0!	0.00974639	-0.661
Q8BZ71	SH3 and cysteine-rich domain-containing protein 3 OS=Mus musculus GN=Stac3 PE=2 SV=1	STAC3_MOUSE	Stac3	1	0	0	0	0	0	0	0	0	0	0	0	0	0	0	0	0	0	0	0	0	0	0	0	0.0176909	-0.663	0	0.166667	0	#DIV/0!	0.00974639	-0.661
Q8C5W3	Isoform 2 of Tubulin-specific chaperone cofactor E-like protein OS=Mus musculus GN=Tbcel	TBCEL_MOUSE	Tbcel Lrrc35	1	0	0	0	0	0	0	0	0	0	0	0	0	0	0	0	0	0	0	0	0	0	0	0	0.0176909	-0.663	0	0.166667	0	#DIV/0!	0.00974639	-0.661
Q8CG47	Structural maintenance of chromosomes protein 4 OS=Mus musculus GN=Smc4 PE=1 SV=1	SMC4_MOUSE	Smc4 Capc Smc4l1	1	0	0	0	0	0	0	0	0	0	0	0	0	0	0	0	0	0	0	0	0	0	0	0	0.0176909	-0.663	0	0.166667	0	#DIV/0!	0.00974639	-0.661
Q8CI59	Isoform 2 of Metalloreductase STEAP3 OS=Mus musculus GN=Steap3	STEA3_MOUSE	Steap3 Tsap6	1	0	0	0	0	0	0	0	0	0	0	0	0	0	0	0	0	0	0	0	0	0	0	0	0.0176909	-0.663	0	0.166667	0	#DIV/0!	0.00974639	-0.661
Q8K1B9	Polypeptide N-acetylgalactosaminyltransferase 18 OS=Mus musculus GN=Galnt18 PE=2 SV=1	GLT18_MOUSE	Galnt18 Galntl4	1	0	0	0	0	0	0	0	0	0	0	0	0	0	0	0	0	0	0	0	0	0	0	0	0.0176909	-0.663	0	0.166667	0	#DIV/0!	0.00974639	-0.661
Q91WM1	Isoform 2 of Spermatid perinuclear RNA-binding protein OS=Mus musculus GN=Strbp	STRBP_MOUSE	Strbp Spnr	1	0	0	0	0	0	0	0	0	0	0	0	0	0	0	0	0	0	0	0	0	0	0	0	0.0176909	-0.663	0	0.166667	0	#DIV/0!	0.00974639	-0.661
Q91XW8	Isoform 3 of Inactive peptidyl-prolyl cis-trans isomerase FKBP6 OS=Mus musculus GN=Fkbp6	FKBP6_MOUSE	Fkbp6 Fkbp36	1	0	0	0	0	0	0	0	0	0	0	0	0	0	0	0	0	0	0	0	0	0	0	0	0.0176909	-0.663	0	0.166667	0	#DIV/0!	0.00974639	-0.661
Q920G3	Sialic acid-binding Ig-like lectin 5 OS=Mus musculus GN=Siglec5 PE=2 SV=1	SIGL5_MOUSE	Siglec5 Siglecf	1	0	0	0	0	0	0	0	0	0	0	0	0	0	0	0	0	0	0	0	0	0	0	0	0.0176909	-0.663	0	0.166667	0	#DIV/0!	0.00974639	-0.661
Q921N6	Probable ATP-dependent RNA helicase DDX27 OS=Mus musculus GN=Ddx27 PE=1 SV=3	DDX27_MOUSE	Ddx27	1	0	0	0	0	0	0	0	0	0	0	0	0	0	0	0	0	0	0	0	0	0	0	0	0.0176909	-0.663	0	0.166667	0	#DIV/0!	0.00974639	-0.661
Q9CYK1	Tryptophan--tRNA ligase, mitochondrial OS=Mus musculus GN=Wars2 PE=2 SV=2	SYWM_MOUSE	Wars2	1	0	0	0	0	0	0	0	0	0	0	0	0	0	0	0	0	0	0	0	0	0	0	0	0.0176909	-0.663	0	0.166667	0	#DIV/0!	0.00974639	-0.661
Q9D3S5	NADP-dependent oxidoreductase domain-containing protein 1 OS=Mus musculus GN=Noxred1 PE=2 SV=1	NXRD1_MOUSE	Noxred1	1	0	0	0	0	0	0	0	0	0	0	0	0	0	0	0	0	0	0	0	0	0	0	0	0.0176909	-0.663	0	0.166667	0	#DIV/0!	0.00974639	-0.661
Q9D9Z7	Histone H2B subacrosomal variant OS=Mus musculus GN=Subh2bv PE=1 SV=3	H2BV_MOUSE	Subh2bv	1	0	0	0	0	0	0	0	0	0	0	0	0	0	0	0	0	0	0	0	0	0	0	0	0.0176909	-0.663	0	0.166667	0	#DIV/0!	0.00974639	-0.661
Q9DAU9	Zinc finger protein 654 OS=Mus musculus GN=Znf654 PE=1 SV=2	ZN654_MOUSE	Znf654 Zfp654	1	0	0	0	0	0	0	0	0	0	0	0	0	0	0	0	0	0	0	0	0	0	0	0	0.0176909	-0.663	0	0.166667	0	#DIV/0!	0.00974639	-0.661
Q9ER47	Potassium voltage-gated channel subfamily H member 7 OS=Mus musculus GN=Kcnh7 PE=2 SV=2	KCNH7_MOUSE	Kcnh7 Erg3	1	0	0	0	0	0	0	0	0	0	0	0	0	0	0	0	0	0	0	0	0	0	0	0	0.0176909	-0.663	0	0.166667	0	#DIV/0!	0.00974639	-0.661
Q9JI78	Peptide-N(4)-(N-acetyl-beta-glucosaminyl)asparagine amidase OS=Mus musculus GN=Ngly1 PE=1 SV=2	NGLY1_MOUSE	Ngly1	1	0	0	0	0	0	0	0	0	0	0	0	0	0	0	0	0	0	0	0	0	0	0	0	0.0176909	-0.663	0	0.166667	0	#DIV/0!	0.00974639	-0.661
Q9JIA1	Leucine-rich glioma-inactivated protein 1 OS=Mus musculus GN=Lgi1 PE=1 SV=1	LGI1_MOUSE	Lgi1	1	0	0	0	0	0	0	0	0	0	0	0	0	0	0	0	0	0	0	0	0	0	0	0	0.0176909	-0.663	0	0.166667	0	#DIV/0!	0.00974639	-0.661
Q9JKT4	Taste receptor type 2 member 105 OS=Mus musculus GN=Tas2r105 PE=1 SV=1	TR105_MOUSE	Tas2r105 Tas2r5 Tas2r9	1	0	0	0	0	0	0	0	0	0	0	0	0	0	0	0	0	0	0	0	0	0	0	0	0.0176909	-0.663	0	0.166667	0	#DIV/0!	0.00974639	-0.661
Q9R0Q6	Actin-related protein 2/3 complex subunit 1B OS=Mus musculus GN=Arpc1b PE=2 SV=4	ARC1A_MOUSE	Arpc1a Sid329	1	0	0	0	0	0	0	0	0	0	0	0	0	0	0	0	0	0	0	0	0	0	0	0	0.0176909	-0.663	0	0.166667	0	#DIV/0!	0.00974639	-0.661
Q9WTK2	Chromodomain Y-like protein OS=Mus musculus GN=Cdyl PE=1 SV=1	CDYL_MOUSE	Cdyl	1	0	0	0	0	0	0	0	0	0	0	0	0	0	0	0	0	0	0	0	0	0	0	0	0.0176909	-0.663	0	0.166667	0	#DIV/0!	0.00974639	-0.661
Q9WTX6	Cullin-1 OS=Mus musculus GN=Cul1 PE=1 SV=1	CUL1_MOUSE	Cul1	1	0	0	0	0	0	0	0	0	0	0	0	0	0	0	0	0	0	0	0	0	0	0	0	0.0176909	-0.663	0	0.166667	0	#DIV/0!	0.00974639	-0.661
Q9WU20	Methylenetetrahydrofolate reductase OS=Mus musculus GN=Mthfr PE=2 SV=2	MTHR_MOUSE	Mthfr	1	0	0	0	0	0	0	0	0	0	0	0	0	0	0	0	0	0	0	0	0	0	0	0	0.0176909	-0.663	0	0.166667	0	#DIV/0!	0.00974639	-0.661
Q9WU79	Proline dehydrogenase 1, mitochondrial OS=Mus musculus GN=Prodh PE=1 SV=2	PROD_MOUSE	Prodh Pro1	1	0	0	0	0	0	0	0	0	0	0	0	0	0	0	0	0	0	0	0	0	0	0	0	0.0176909	-0.663	0	0.166667	0	#DIV/0!	0.00974639	-0.661
Q9Z1A9	TBC1 domain family member 8 OS=Mus musculus GN=Tbc1d8 PE=2 SV=2	TBCD8_MOUSE	Tbc1d8 Hblp1 Vrp	1	0	0	0	0	0	0	0	0	0	0	0	0	0	0	0	0	0	0	0	0	0	0	0	0.0176909	-0.663	0	0.166667	0	#DIV/0!	0.00974639	-0.661
Q9Z2H2	Regulator of G-protein signaling 6 OS=Mus musculus GN=Rgs6 PE=1 SV=2	RGS6_MOUSE	Rgs6	1	0	0	0	0	0	0	0	0	0	0	0	0	0	0	0	0	0	0	0	0	0	0	0	0.0176909	-0.663	0	0.166667	0	#DIV/0!	0.00974639	-0.661
A6H5X4-2	Isoform 2 of PHD finger protein 11 OS=Mus musculus GN=Phf11	PHF11_MOUSE	Phf11 D14Ertd668e Phf11d Phf11l	0	1	0	0	0	0	0	0	0	0	0	0	0	0	0	0	0	0	0	0	0	0	0	0	0.00178472	-0.617	0	0.166667	0	#DIV/0!	0.000968079	-0.614
A6PWD2	Isoform 4 of Forkhead-associated domain-containing protein 1 OS=Mus musculus GN=Fhad1	FHAD1_MOUSE	Fhad1	0	1	0	0	0	0	0	0	0	0	0	0	0	0	0	0	0	0	0	0	0	0	0	0	0.00178472	-0.617	0	0.166667	0	#DIV/0!	0.000968079	-0.614
B1AUC7	Rho GTPase-activating protein 36 OS=Mus musculus GN=Arhgap36 PE=2 SV=1	RHG36_MOUSE	Arhgap36	0	1	0	0	0	0	0	0	0	0	0	0	0	0	0	0	0	0	0	0	0	0	0	0	0.00178472	-0.617	0	0.166667	0	#DIV/0!	0.000968079	-0.614
O70194	Eukaryotic translation initiation factor 3 subunit D OS=Mus musculus GN=Eif3d PE=1 SV=2	EIF3D_MOUSE	Eif3d Eif3s7	0	1	0	0	0	0	0	0	0	0	0	0	0	0	0	0	0	0	0	0	0	0	0	0	0.00178472	-0.617	0	0.166667	0	#DIV/0!	0.000968079	-0.614
O70273	Isoform 2 of ETS homologous factor OS=Mus musculus GN=Ehf	EHF_MOUSE	Ehf	0	1	0	0	0	0	0	0	0	0	0	0	0	0	0	0	0	0	0	0	0	0	0	0	0.00178472	-0.617	0	0.166667	0	#DIV/0!	0.000968079	-0.614
O70318	Band 4.1-like protein 2 OS=Mus musculus GN=Epb41l2 PE=1 SV=2	E41L2_MOUSE	Epb41l2 Epb4.1l2	0	1	0	0	0	0	0	0	0	0	0	0	0	0	0	0	0	0	0	0	0	0	0	0	0.00178472	-0.617	0	0.166667	0	#DIV/0!	0.000968079	-0.614
O88569	Isoform 3 of Heterogeneous nuclear ribonucleoproteins A2/B1 OS=Mus musculus GN=Hnrnpa2b1	ROA2_MOUSE	Hnrnpa2b1 Hnrpa2b1	0	1	0	0	0	0	0	0	0	0	0	0	0	0	0	0	0	0	0	0	0	0	0	0	0.00178472	-0.617	0	0.166667	0	#DIV/0!	0.000968079	-0.614
P06802	Isoform 1 of Ectonucleotide pyrophosphatase/phosphodiesterase family member 1 OS=Mus musculus GN=Enpp1	ENPP1_MOUSE	Enpp1 Npps Pc1 Pdnp1	0	1	0	0	0	0	0	0	0	0	0	0	0	0	0	0	0	0	0	0	0	0	0	0	0.00178472	-0.617	0	0.166667	0	#DIV/0!	0.000968079	-0.614
P10166	Protein L-Myc OS=Mus musculus GN=Mycl PE=2 SV=1	MYCL_MOUSE	Mycl Lmyc1 Mycl1	0	1	0	0	0	0	0	0	0	0	0	0	0	0	0	0	0	0	0	0	0	0	0	0	0.00178472	-0.617	0	0.166667	0	#DIV/0!	0.000968079	-0.614
P11032	Isoform HF2 of Granzyme A OS=Mus musculus GN=Gzma	GRAA_MOUSE	Gzma Ctla-3 Ctla3 Mtsp-1	0	1	0	0	0	0	0	0	0	0	0	0	0	0	0	0	0	0	0	0	0	0	0	0	0.00178472	-0.617	0	0.166667	0	#DIV/0!	0.000968079	-0.614
P13366	Granzyme G OS=Mus musculus GN=Gzmg PE=1 SV=1	GRAG_MOUSE	Gzmg	0	1	0	0	0	0	0	0	0	0	0	0	0	0	0	0	0	0	0	0	0	0	0	0	0.00178472	-0.617	0	0.166667	0	#DIV/0!	0.000968079	-0.614
P17141	Zinc finger protein 37 OS=Mus musculus GN=Zfp37 PE=2 SV=4	ZFP37_MOUSE	Zfp37 Zfp-37	0	1	0	0	0	0	0	0	0	0	0	0	0	0	0	0	0	0	0	0	0	0	0	0	0.00178472	-0.617	0	0.166667	0	#DIV/0!	0.000968079	-0.614
P24788	Cyclin-dependent kinase 11B OS=Mus musculus GN=Cdk11b PE=1 SV=2	CD11B_MOUSE	Cdk11b Cdc2l1 Cdk11	0	1	0	0	0	0	0	0	0	0	0	0	0	0	0	0	0	0	0	0	0	0	0	0	0.00178472	-0.617	0	0.166667	0	#DIV/0!	0.000968079	-0.614
P53347	Oncostatin-M OS=Mus musculus GN=Osm PE=1 SV=1	ONCM_MOUSE	Osm	0	1	0	0	0	0	0	0	0	0	0	0	0	0	0	0	0	0	0	0	0	0	0	0	0.00178472	-0.617	0	0.166667	0	#DIV/0!	0.000968079	-0.614
P62141	Serine/threonine-protein phosphatase PP1-beta catalytic subunit OS=Mus musculus GN=Ppp1cb PE=1 SV=3	PP1B_MOUSE	Ppp1cb	0	1	0	0	0	0	0	0	0	0	0	0	0	0	0	0	0	0	0	0	0	0	0	0	0.00178472	-0.617	0	0.166667	0	#DIV/0!	0.000968079	-0.614
P62984	Ubiquitin-60S ribosomal protein L40 OS=Mus musculus GN=Uba52 PE=1 SV=2	RL40_MOUSE	Uba52 Ubcep2	0	1	0	0	0	0	0	0	0	0	0	0	0	0	0	0	0	0	0	0	0	0	0	0	0.00178472	-0.617	0	0.166667	0	#DIV/0!	0.000968079	-0.614
P70181	Isoform 2 of Phosphatidylinositol 4-phosphate 5-kinase type-1 beta OS=Mus musculus GN=Pip5k1b	PI51B_MOUSE	Pip5k1b Pip5k1a	0	1	0	0	0	0	0	0	0	0	0	0	0	0	0	0	0	0	0	0	0	0	0	0	0.00178472	-0.617	0	0.166667	0	#DIV/0!	0.000968079	-0.614
P70351	Histone-lysine N-methyltransferase EZH1 OS=Mus musculus GN=Ezh1 PE=1 SV=1	EZH1_MOUSE	Ezh1 Enx2	0	1	0	0	0	0	0	0	0	0	0	0	0	0	0	0	0	0	0	0	0	0	0	0	0.00178472	-0.617	0	0.166667	0	#DIV/0!	0.000968079	-0.614
P83940	Transcription elongation factor B polypeptide 1 OS=Mus musculus GN=Tceb1 PE=1 SV=1	ELOC_MOUSE	Tceb1	0	1	0	0	0	0	0	0	0	0	0	0	0	0	0	0	0	0	0	0	0	0	0	0	0.00178472	-0.617	0	0.166667	0	#DIV/0!	0.000968079	-0.614
P97459	Neuronal PAS domain-containing protein 1 OS=Mus musculus GN=Npas1 PE=1 SV=1	NPAS1_MOUSE	Npas1	0	1	0	0	0	0	0	0	0	0	0	0	0	0	0	0	0	0	0	0	0	0	0	0	0.00178472	-0.617	0	0.166667	0	#DIV/0!	0.000968079	-0.614
P97770	Isoform 2 of THUMP domain-containing protein 3 OS=Mus musculus GN=Thumpd3	THUM3_MOUSE	Thumpd3	0	1	0	0	0	0	0	0	0	0	0	0	0	0	0	0	0	0	0	0	0	0	0	0	0.00178472	-0.617	0	0.166667	0	#DIV/0!	0.000968079	-0.614
Q00342	Receptor-type tyrosine-protein kinase FLT3 OS=Mus musculus GN=Flt3 PE=1 SV=1	FLT3_MOUSE	Flt3 Flk-2 Flt-3	0	1	0	0	0	0	0	0	0	0	0	0	0	0	0	0	0	0	0	0	0	0	0	0	0.00178472	-0.617	0	0.166667	0	#DIV/0!	0.000968079	-0.614
Q02858	Angiopoietin-1 receptor OS=Mus musculus GN=Tek PE=1 SV=2	TIE2_MOUSE	Tek Hyk Tie-2 Tie2	0	1	0	0	0	0	0	0	0	0	0	0	0	0	0	0	0	0	0	0	0	0	0	0	0.00178472	-0.617	0	0.166667	0	#DIV/0!	0.000968079	-0.614
Q0VBL6	Isoform 2 of Hypoxia-inducible factor 3-alpha OS=Mus musculus GN=Hif3a	HIF3A_MOUSE	Hif3a Mop7 Nepas	0	1	0	0	0	0	0	0	0	0	0	0	0	0	0	0	0	0	0	0	0	0	0	0	0.00178472	-0.617	0	0.166667	0	#DIV/0!	0.000968079	-0.614
Q14AT2	Isoform 2 of Testis-expressed sequence 11 protein OS=Mus musculus GN=Tex11	TEX11_MOUSE	Tex11	0	1	0	0	0	0	0	0	0	0	0	0	0	0	0	0	0	0	0	0	0	0	0	0	0.00178472	-0.617	0	0.166667	0	#DIV/0!	0.000968079	-0.614
Q3TX08	tRNA (guanine(26)-N(2))-dimethyltransferase OS=Mus musculus GN=Trmt1 PE=1 SV=2	TRM1_MOUSE	Trmt1 D8Ertd812e	0	1	0	0	0	0	0	0	0	0	0	0	0	0	0	0	0	0	0	0	0	0	0	0	0.00178472	-0.617	0	0.166667	0	#DIV/0!	0.000968079	-0.614
Q3UH06	Isoform 3 of Ras-responsive element-binding protein 1 OS=Mus musculus GN=Rreb1	RREB1_MOUSE	Rreb1	0	1	0	0	0	0	0	0	0	0	0	0	0	0	0	0	0	0	0	0	0	0	0	0	0.00178472	-0.617	0	0.166667	0	#DIV/0!	0.000968079	-0.614
Q3UH53	Protein sidekick-1 OS=Mus musculus GN=Sdk1 PE=2 SV=1	SDK1_MOUSE	Sdk1	0	1	0	0	0	0	0	0	0	0	0	0	0	0	0	0	0	0	0	0	0	0	0	0	0.00178472	-0.617	0	0.166667	0	#DIV/0!	0.000968079	-0.614
Q3UI66	Coiled-coil domain-containing protein 34 OS=Mus musculus GN=Ccdc34 PE=2 SV=1	CCD34_MOUSE	Ccdc34	0	1	0	0	0	0	0	0	0	0	0	0	0	0	0	0	0	0	0	0	0	0	0	0	0.00178472	-0.617	0	0.166667	0	#DIV/0!	0.000968079	-0.614
Q3UIK4	Isoform 2 of N6-adenosine-methyltransferase subunit METTL14 OS=Mus musculus GN=Mettl14	MET14_MOUSE	Mettl14 Kiaa1627	0	1	0	0	0	0	0	0	0	0	0	0	0	0	0	0	0	0	0	0	0	0	0	0	0.00178472	-0.617	0	0.166667	0	#DIV/0!	0.000968079	-0.614
Q3UPI1	Protein FAM198B OS=Mus musculus GN=Fam198b PE=2 SV=1	F198B_MOUSE	Fam198b Ened	0	1	0	0	0	0	0	0	0	0	0	0	0	0	0	0	0	0	0	0	0	0	0	0	0.00178472	-0.617	0	0.166667	0	#DIV/0!	0.000968079	-0.614
Q3UPL0	Isoform 2 of Protein transport protein Sec31A OS=Mus musculus GN=Sec31a	SC31A_MOUSE	Sec31a Sec31l1	0	1	0	0	0	0	0	0	0	0	0	0	0	0	0	0	0	0	0	0	0	0	0	0	0.00178472	-0.617	0	0.166667	0	#DIV/0!	0.000968079	-0.614
Q3V0G7	Isoform 2 of GTPase-activating Rap/Ran-GAP domain-like protein 3 OS=Mus musculus GN=Garnl3	GARL3_MOUSE	Garnl3	0	1	0	0	0	0	0	0	0	0	0	0	0	0	0	0	0	0	0	0	0	0	0	0	0.00178472	-0.617	0	0.166667	0	#DIV/0!	0.000968079	-0.614
Q3ZK22	Isoform 4 of Vezatin OS=Mus musculus GN=Vezt	VEZA_MOUSE	Vezt	0	1	0	0	0	0	0	0	0	0	0	0	0	0	0	0	0	0	0	0	0	0	0	0	0.00178472	-0.617	0	0.166667	0	#DIV/0!	0.000968079	-0.614
Q4KL35	PDZ domain-containing protein MAGIX OS=Mus musculus GN=Magix PE=1 SV=1	MAGIX_MOUSE	Magix Pdzx	0	1	0	0	0	0	0	0	0	0	0	0	0	0	0	0	0	0	0	0	0	0	0	0	0.00178472	-0.617	0	0.166667	0	#DIV/0!	0.000968079	-0.614
Q5KU39	Vacuolar protein sorting-associated protein 41 homolog OS=Mus musculus GN=Vps41 PE=2 SV=1	VPS41_MOUSE	Vps41	0	1	0	0	0	0	0	0	0	0	0	0	0	0	0	0	0	0	0	0	0	0	0	0	0.00178472	-0.617	0	0.166667	0	#DIV/0!	0.000968079	-0.614
Q5SPL2	Isoform 2 of PHD finger protein 12 OS=Mus musculus GN=Phf12	PHF12_MOUSE	Phf12 Kiaa1523	0	1	0	0	0	0	0	0	0	0	0	0	0	0	0	0	0	0	0	0	0	0	0	0	0.00178472	-0.617	0	0.166667	0	#DIV/0!	0.000968079	-0.614
Q60759	Glutaryl-CoA dehydrogenase, mitochondrial OS=Mus musculus GN=Gcdh PE=1 SV=2	GCDH_MOUSE	Gcdh	0	1	0	0	0	0	0	0	0	0	0	0	0	0	0	0	0	0	0	0	0	0	0	0	0.00178472	-0.617	0	0.166667	0	#DIV/0!	0.000968079	-0.614
Q62052	P protein OS=Mus musculus GN=Oca2 PE=1 SV=1	P_MOUSE	Oca2 P	0	1	0	0	0	0	0	0	0	0	0	0	0	0	0	0	0	0	0	0	0	0	0	0	0.00178472	-0.617	0	0.166667	0	#DIV/0!	0.000968079	-0.614
Q62376	U1 small nuclear ribonucleoprotein 70 kDa OS=Mus musculus GN=Snrnp70 PE=1 SV=2	RU17_MOUSE	Snrnp70 Snrp70	0	1	0	0	0	0	0	0	0	0	0	0	0	0	0	0	0	0	0	0	0	0	0	0	0.00178472	-0.617	0	0.166667	0	#DIV/0!	0.000968079	-0.614
Q66PY1	Isoform 2 of Signal peptide, CUB and EGF-like domain-containing protein 3 OS=Mus musculus GN=Scube3	SCUB3_MOUSE	Scube3	0	1	0	0	0	0	0	0	0	0	0	0	0	0	0	0	0	0	0	0	0	0	0	0	0.00178472	-0.617	0	0.166667	0	#DIV/0!	0.000968079	-0.614
Q68FE6	Protein FAM65A OS=Mus musculus GN=Fam65a PE=1 SV=2	FA65A_MOUSE	Fam65a Kiaa1930	0	1	0	0	0	0	0	0	0	0	0	0	0	0	0	0	0	0	0	0	0	0	0	0	0.00178472	-0.617	0	0.166667	0	#DIV/0!	0.000968079	-0.614
Q68FL6	Methionine--tRNA ligase, cytoplasmic OS=Mus musculus GN=Mars PE=2 SV=1	SYMC_MOUSE	Mars	0	1	0	0	0	0	0	0	0	0	0	0	0	0	0	0	0	0	0	0	0	0	0	0	0.00178472	-0.617	0	0.166667	0	#DIV/0!	0.000968079	-0.614
Q6DIB5	Multiple epidermal growth factor-like domains protein 10 OS=Mus musculus GN=Megf10 PE=1 SV=1	MEG10_MOUSE	Megf10	0	1	0	0	0	0	0	0	0	0	0	0	0	0	0	0	0	0	0	0	0	0	0	0	0.00178472	-0.617	0	0.166667	0	#DIV/0!	0.000968079	-0.614
Q6KAR6	Exocyst complex component 3 OS=Mus musculus GN=Exoc3 PE=1 SV=2	EXOC3_MOUSE	Exoc3 Sec6l1	0	1	0	0	0	0	0	0	0	0	0	0	0	0	0	0	0	0	0	0	0	0	0	0	0.00178472	-0.617	0	0.166667	0	#DIV/0!	0.000968079	-0.614
Q80TF4	Isoform 5 of Kelch-like protein 13 OS=Mus musculus GN=Klhl13	KLH13_MOUSE	Klhl13 Bklhd2 Kiaa1309	0	1	0	0	0	0	0	0	0	0	0	0	0	0	0	0	0	0	0	0	0	0	0	0	0.00178472	-0.617	0	0.166667	0	#DIV/0!	0.000968079	-0.614
Q80WM3	Complexin-4 OS=Mus musculus GN=Cplx4 PE=1 SV=2	CPLX4_MOUSE	Cplx4	0	1	0	0	0	0	0	0	0	0	0	0	0	0	0	0	0	0	0	0	0	0	0	0	0.00178472	-0.617	0	0.166667	0	#DIV/0!	0.000968079	-0.614
Q80X85	28S ribosomal protein S7, mitochondrial OS=Mus musculus GN=Mrps7 PE=2 SV=1	RT07_MOUSE	Mrps7	0	1	0	0	0	0	0	0	0	0	0	0	0	0	0	0	0	0	0	0	0	0	0	0	0.00178472	-0.617	0	0.166667	0	#DIV/0!	0.000968079	-0.614
Q80XE1	Isoform 1 of Synembryn-B OS=Mus musculus GN=Ric8b	RIC8B_MOUSE	Ric8b	0	1	0	0	0	0	0	0	0	0	0	0	0	0	0	0	0	0	0	0	0	0	0	0	0.00178472	-0.617	0	0.166667	0	#DIV/0!	0.000968079	-0.614
Q80XL7	Isoform 3 of Metallophosphoesterase 1 OS=Mus musculus GN=Mppe1	MPPE1_MOUSE	Mppe1 Pgap5	0	1	0	0	0	0	0	0	0	0	0	0	0	0	0	0	0	0	0	0	0	0	0	0	0.00178472	-0.617	0	0.166667	0	#DIV/0!	0.000968079	-0.614
Q8BH74	Nuclear pore complex protein Nup107 OS=Mus musculus GN=Nup107 PE=2 SV=1	NU107_MOUSE	Nup107	0	1	0	0	0	0	0	0	0	0	0	0	0	0	0	0	0	0	0	0	0	0	0	0	0.00178472	-0.617	0	0.166667	0	#DIV/0!	0.000968079	-0.614
Q8BLQ7	Cationic amino acid transporter 4 OS=Mus musculus GN=Slc7a4 PE=2 SV=1	CTR4_MOUSE	Slc7a4	0	1	0	0	0	0	0	0	0	0	0	0	0	0	0	0	0	0	0	0	0	0	0	0	0.00178472	-0.617	0	0.166667	0	#DIV/0!	0.000968079	-0.614
Q8BTY1	Kynurenine--oxoglutarate transaminase 1 OS=Mus musculus GN=Ccbl1 PE=1 SV=1	KAT1_MOUSE	Ccbl1 Kat	0	1	0	0	0	0	0	0	0	0	0	0	0	0	0	0	0	0	0	0	0	0	0	0	0.00178472	-0.617	0	0.166667	0	#DIV/0!	0.000968079	-0.614
Q8BZ52	Fibronectin type III and SPRY domain-containing protein 2 OS=Mus musculus GN=Fsd2 PE=2 SV=2	FSD2_MOUSE	Fsd2 Spryd1	0	1	0	0	0	0	0	0	0	0	0	0	0	0	0	0	0	0	0	0	0	0	0	0	0.00178472	-0.617	0	0.166667	0	#DIV/0!	0.000968079	-0.614
Q8C160	Mesothelin-like protein OS=Mus musculus GN=Mslnl PE=2 SV=1	MSLNL_MOUSE	Mslnl Mpfl	0	1	0	0	0	0	0	0	0	0	0	0	0	0	0	0	0	0	0	0	0	0	0	0	0.00178472	-0.617	0	0.166667	0	#DIV/0!	0.000968079	-0.614
Q8CDV6	Isoform 2 of Coiled-coil domain-containing protein 63 OS=Mus musculus GN=Ccdc63	CCD63_MOUSE	Ccdc63	0	1	0	0	0	0	0	0	0	0	0	0	0	0	0	0	0	0	0	0	0	0	0	0	0.00178472	-0.617	0	0.166667	0	#DIV/0!	0.000968079	-0.614
Q8K010	5-oxoprolinase OS=Mus musculus GN=Oplah PE=2 SV=1	OPLA_MOUSE	Oplah	0	1	0	0	0	0	0	0	0	0	0	0	0	0	0	0	0	0	0	0	0	0	0	0	0.00178472	-0.617	0	0.166667	0	#DIV/0!	0.000968079	-0.614
Q8K0C4	Lanosterol 14-alpha demethylase OS=Mus musculus GN=Cyp51a1 PE=2 SV=1	CP51A_MOUSE	Cyp51a1 Cyp51	0	1	0	0	0	0	0	0	0	0	0	0	0	0	0	0	0	0	0	0	0	0	0	0	0.00178472	-0.617	0	0.166667	0	#DIV/0!	0.000968079	-0.614
Q8K2A6	Lipase member M OS=Mus musculus GN=Lipm PE=2 SV=1	LIPM_MOUSE	Lipm Lipl3	0	1	0	0	0	0	0	0	0	0	0	0	0	0	0	0	0	0	0	0	0	0	0	0	0.00178472	-0.617	0	0.166667	0	#DIV/0!	0.000968079	-0.614
Q8K2A7	Integrator complex subunit 10 OS=Mus musculus GN=Ints10 PE=1 SV=3	INT10_MOUSE	Ints10	0	1	0	0	0	0	0	0	0	0	0	0	0	0	0	0	0	0	0	0	0	0	0	0	0.00178472	-0.617	0	0.166667	0	#DIV/0!	0.000968079	-0.614
Q8K2F0	Isoform 2 of Bromodomain-containing protein 3 OS=Mus musculus GN=Brd3	BRD3_MOUSE	Brd3 Fsrg2	0	1	0	0	0	0	0	0	0	0	0	0	0	0	0	0	0	0	0	0	0	0	0	0	0.00178472	-0.617	0	0.166667	0	#DIV/0!	0.000968079	-0.614
Q8K3M5	CDK5 and ABL1 enzyme substrate 2 OS=Mus musculus GN=Cables2 PE=1 SV=2	CABL2_MOUSE	Cables2	0	1	0	0	0	0	0	0	0	0	0	0	0	0	0	0	0	0	0	0	0	0	0	0	0.00178472	-0.617	0	0.166667	0	#DIV/0!	0.000968079	-0.614
Q8QZT2	Centriole, cilia and spindle-associated protein OS=Mus musculus GN=Ccsap PE=2 SV=1	CCSAP_MOUSE	Ccsap	0	1	0	0	0	0	0	0	0	0	0	0	0	0	0	0	0	0	0	0	0	0	0	0	0.00178472	-0.617	0	0.166667	0	#DIV/0!	0.000968079	-0.614
Q8QZV6	Protein FAM161A OS=Mus musculus GN=Fam161a PE=1 SV=1	F161A_MOUSE	Fam161a	0	1	0	0	0	0	0	0	0	0	0	0	0	0	0	0	0	0	0	0	0	0	0	0	0.00178472	-0.617	0	0.166667	0	#DIV/0!	0.000968079	-0.614
Q8VCA6	Transmembrane protein 161A OS=Mus musculus GN=Tmem161a PE=2 SV=1	T161A_MOUSE	Tmem161a	0	1	0	0	0	0	0	0	0	0	0	0	0	0	0	0	0	0	0	0	0	0	0	0	0.00178472	-0.617	0	0.166667	0	#DIV/0!	0.000968079	-0.614
Q8VCK3	Tubulin gamma-2 chain OS=Mus musculus GN=Tubg2 PE=1 SV=1	TBG2_MOUSE	Tubg2	0	1	0	0	0	0	0	0	0	0	0	0	0	0	0	0	0	0	0	0	0	0	0	0	0.00178472	-0.617	0	0.166667	0	#DIV/0!	0.000968079	-0.614
Q8VIB3	Type 2 lactosamine alpha-2,3-sialyltransferase OS=Mus musculus GN=St3gal6 PE=2 SV=3	SIA10_MOUSE	St3gal6 Siat10	0	1	0	0	0	0	0	0	0	0	0	0	0	0	0	0	0	0	0	0	0	0	0	0	0.00178472	-0.617	0	0.166667	0	#DIV/0!	0.000968079	-0.614
Q91VW9	Zinc finger protein with KRAB and SCAN domains 3 OS=Mus musculus GN=Zkscan3 PE=2 SV=1	ZKSC3_MOUSE	Zkscan3 Skz1 Zfp306 Zfp307 Zfp47	0	1	0	0	0	0	0	0	0	0	0	0	0	0	0	0	0	0	0	0	0	0	0	0	0.00178472	-0.617	0	0.166667	0	#DIV/0!	0.000968079	-0.614
Q91XL9	Oxysterol-binding protein-related protein 1 OS=Mus musculus GN=Osbpl1a PE=1 SV=2	OSBL1_MOUSE	Osbpl1a Orp1 Orp1a Orp1l	0	1	0	0	0	0	0	0	0	0	0	0	0	0	0	0	0	0	0	0	0	0	0	0	0.00178472	-0.617	0	0.166667	0	#DIV/0!	0.000968079	-0.614
Q91Y44	Bromodomain testis-specific protein OS=Mus musculus GN=Brdt PE=1 SV=3	BRDT_MOUSE	Brdt Fsrg3	0	1	0	0	0	0	0	0	0	0	0	0	0	0	0	0	0	0	0	0	0	0	0	0	0.00178472	-0.617	0	0.166667	0	#DIV/0!	0.000968079	-0.614
Q99MR8	Methylcrotonoyl-CoA carboxylase subunit alpha, mitochondrial OS=Mus musculus GN=Mccc1 PE=1 SV=2	MCCA_MOUSE	Mccc1 Mcca	0	1	0	0	0	0	0	0	0	0	0	0	0	0	0	0	0	0	0	0	0	0	0	0	0.00178472	-0.617	0	0.166667	0	#DIV/0!	0.000968079	-0.614
Q99NB8	Ubiquilin-4 OS=Mus musculus GN=Ubqln4 PE=1 SV=1	UBQL4_MOUSE	Ubqln4 Cip75 Ubin	0	1	0	0	0	0	0	0	0	0	0	0	0	0	0	0	0	0	0	0	0	0	0	0	0.00178472	-0.617	0	0.166667	0	#DIV/0!	0.000968079	-0.614
Q99NF3	Centrosomal protein of 41 kDa OS=Mus musculus GN=Cep41 PE=1 SV=1	CEP41_MOUSE	Cep41 Tsga14	0	1	0	0	0	0	0	0	0	0	0	0	0	0	0	0	0	0	0	0	0	0	0	0	0.00178472	-0.617	0	0.166667	0	#DIV/0!	0.000968079	-0.614
Q99PS0	Keratin, type I cytoskeletal 23 OS=Mus musculus GN=Krt23 PE=2 SV=1	K1C23_MOUSE	Krt23 Haik1 Krt1-23	0	1	0	0	0	0	0	0	0	0	0	0	0	0	0	0	0	0	0	0	0	0	0	0	0.00178472	-0.617	0	0.166667	0	#DIV/0!	0.000968079	-0.614
Q99PT9	Kinesin-like protein KIF19 OS=Mus musculus GN=Kif19 PE=1 SV=2	KIF19_MOUSE	Kif19 Kif19a	0	1	0	0	0	0	0	0	0	0	0	0	0	0	0	0	0	0	0	0	0	0	0	0	0.00178472	-0.617	0	0.166667	0	#DIV/0!	0.000968079	-0.614
Q9CWW7	CXXC-type zinc finger protein 1 OS=Mus musculus GN=Cxxc1 PE=2 SV=1	CXXC1_MOUSE	Cxxc1 Cgbp Pccx1	0	1	0	0	0	0	0	0	0	0	0	0	0	0	0	0	0	0	0	0	0	0	0	0	0.00178472	-0.617	0	0.166667	0	#DIV/0!	0.000968079	-0.614
Q9D5A9	Inactive ribonuclease-like protein 10 OS=Mus musculus GN=Rnase10 PE=1 SV=1	RNS10_MOUSE	Rnase10	0	1	0	0	0	0	0	0	0	0	0	0	0	0	0	0	0	0	0	0	0	0	0	0	0.00178472	-0.617	0	0.166667	0	#DIV/0!	0.000968079	-0.614
Q9D646	Keratin, type I cuticular Ha4 OS=Mus musculus GN=Krt34 PE=2 SV=1	KRT34_MOUSE	Krt34 Ha4 Krt1-4	0	1	0	0	0	0	0	0	0	0	0	0	0	0	0	0	0	0	0	0	0	0	0	0	0.00178472	-0.617	0	0.166667	0	#DIV/0!	0.000968079	-0.614
Q9D902	General transcription factor IIE subunit 2 OS=Mus musculus GN=Gtf2e2 PE=1 SV=2	T2EB_MOUSE	Gtf2e2	0	1	0	0	0	0	0	0	0	0	0	0	0	0	0	0	0	0	0	0	0	0	0	0	0.00178472	-0.617	0	0.166667	0	#DIV/0!	0.000968079	-0.614
Q9DBG1	Sterol 26-hydroxylase, mitochondrial OS=Mus musculus GN=Cyp27a1 PE=1 SV=1	CP27A_MOUSE	Cyp27a1	0	1	0	0	0	0	0	0	0	0	0	0	0	0	0	0	0	0	0	0	0	0	0	0	0.00178472	-0.617	0	0.166667	0	#DIV/0!	0.000968079	-0.614
Q9JHU4	Cytoplasmic dynein 1 heavy chain 1 OS=Mus musculus GN=Dync1h1 PE=1 SV=2	DYHC1_MOUSE	Dync1h1 Dhc1 Dnch1 Dnchc1 Dyhc	0	1	0	0	0	0	0	0	0	0	0	0	0	0	0	0	0	0	0	0	0	0	0	0	0.00178472	-0.617	0	0.166667	0	#DIV/0!	0.000968079	-0.614
Q9JJ57	Isoform 4 of Kv channel-interacting protein 1 OS=Mus musculus GN=Kcnip1	KCIP1_MOUSE	Kcnip1 Kchip1	0	1	0	0	0	0	0	0	0	0	0	0	0	0	0	0	0	0	0	0	0	0	0	0	0.00178472	-0.617	0	0.166667	0	#DIV/0!	0.000968079	-0.614
Q9JM52	Isoform 3 of Misshapen-like kinase 1 OS=Mus musculus GN=Mink1	MINK1_MOUSE	Mink1 Map4k6 Mink	0	1	0	0	0	0	0	0	0	0	0	0	0	0	0	0	0	0	0	0	0	0	0	0	0.00178472	-0.617	0	0.166667	0	#DIV/0!	0.000968079	-0.614
Q9WU28	Prefoldin subunit 5 OS=Mus musculus GN=Pfdn5 PE=1 SV=1	PFD5_MOUSE	Pfdn5 Eig1 Mm1 Pfd5	0	1	0	0	0	0	0	0	0	0	0	0	0	0	0	0	0	0	0	0	0	0	0	0	0.00178472	-0.617	0	0.166667	0	#DIV/0!	0.000968079	-0.614
Q9WV03	Protein FAM50A OS=Mus musculus GN=Fam50a PE=2 SV=1	FA50A_MOUSE	Fam50a D0HXS9928E Xap5	0	1	0	0	0	0	0	0	0	0	0	0	0	0	0	0	0	0	0	0	0	0	0	0	0.00178472	-0.617	0	0.166667	0	#DIV/0!	0.000968079	-0.614
Q9Z1F9	SUMO-activating enzyme subunit 2 OS=Mus musculus GN=Uba2 PE=1 SV=1	SAE2_MOUSE	Uba2 Sae2 Uble1b	0	1	0	0	0	0	0	0	0	0	0	0	0	0	0	0	0	0	0	0	0	0	0	0	0.00178472	-0.617	0	0.166667	0	#DIV/0!	0.000968079	-0.614
Q9Z329	Isoform 3 of Inositol 1,4,5-trisphosphate receptor type 2 OS=Mus musculus GN=Itpr2	ITPR2_MOUSE	Itpr2 Itpr5	0	1	0	0	0	0	0	0	0	0	0	0	0	0	0	0	0	0	0	0	0	0	0	0	0.00178472	-0.617	0	0.166667	0	#DIV/0!	0.000968079	-0.614
A1A5B6	TBC1 domain family member 25 OS=Mus musculus GN=Tbc1d25 PE=1 SV=1	TBC25_MOUSE	Tbc1d25	0	0	1	0	0	0	0	0	0	0	0	0	0	0	0	0	0	0	0	0	0	0	0	0	6.29554e-05	-0.596	0	0.166667	0	#DIV/0!	3.3946e-05	-0.594
A2A4P0	ATP-dependent RNA helicase DHX8 OS=Mus musculus GN=Dhx8 PE=2 SV=1	DHX8_MOUSE	Dhx8	0	0	1	0	0	0	0	0	0	0	0	0	0	0	0	0	0	0	0	0	0	0	0	0	6.29554e-05	-0.596	0	0.166667	0	#DIV/0!	3.3946e-05	-0.594
A2AKG8	Focadhesin OS=Mus musculus GN=Focad PE=2 SV=1	FOCAD_MOUSE	Focad Kiaa1797	0	0	1	0	0	0	0	0	0	0	0	0	0	0	0	0	0	0	0	0	0	0	0	0	6.29554e-05	-0.596	0	0.166667	0	#DIV/0!	3.3946e-05	-0.594
A2AKX3	Isoform 2 of Probable helicase senataxin OS=Mus musculus GN=Setx	SETX_MOUSE	Setx Als4 Kiaa0625	0	0	1	0	0	0	0	0	0	0	0	0	0	0	0	0	0	0	0	0	0	0	0	0	6.29554e-05	-0.596	0	0.166667	0	#DIV/0!	3.3946e-05	-0.594
A2ARP1	Isoform 6 of Inositol hexakisphosphate and diphosphoinositol-pentakisphosphate kinase 1 OS=Mus musculus GN=Ppip5k1	VIP1_MOUSE	Ppip5k1 Hisppd2a Kiaa0377 Vip1	0	0	1	0	0	0	0	0	0	0	0	0	0	0	0	0	0	0	0	0	0	0	0	0	6.29554e-05	-0.596	0	0.166667	0	#DIV/0!	3.3946e-05	-0.594
O08739	AMP deaminase 3 OS=Mus musculus GN=Ampd3 PE=2 SV=2	AMPD3_MOUSE	Ampd3	0	0	1	0	0	0	0	0	0	0	0	0	0	0	0	0	0	0	0	0	0	0	0	0	6.29554e-05	-0.596	0	0.166667	0	#DIV/0!	3.3946e-05	-0.594
O08899	Regulator of G-protein signaling 4 OS=Mus musculus GN=Rgs4 PE=2 SV=1	RGS4_MOUSE	Rgs4	0	0	1	0	0	0	0	0	0	0	0	0	0	0	0	0	0	0	0	0	0	0	0	0	6.29554e-05	-0.596	0	0.166667	0	#DIV/0!	3.3946e-05	-0.594
O35405	Phospholipase D3 OS=Mus musculus GN=Pld3 PE=2 SV=1	PLD3_MOUSE	Pld3 Sam9	0	0	1	0	0	0	0	0	0	0	0	0	0	0	0	0	0	0	0	0	0	0	0	0	6.29554e-05	-0.596	0	0.166667	0	#DIV/0!	3.3946e-05	-0.594
O35625	Isoform 2 of Axin-1 OS=Mus musculus GN=Axin1	AXIN1_MOUSE	Axin1 Axin Fu	0	0	1	0	0	0	0	0	0	0	0	0	0	0	0	0	0	0	0	0	0	0	0	0	6.29554e-05	-0.596	0	0.166667	0	#DIV/0!	3.3946e-05	-0.594
O54732	Matrix metalloproteinase-15 OS=Mus musculus GN=Mmp15 PE=2 SV=1	MMP15_MOUSE	Mmp15	0	0	1	0	0	0	0	0	0	0	0	0	0	0	0	0	0	0	0	0	0	0	0	0	6.29554e-05	-0.596	0	0.166667	0	#DIV/0!	3.3946e-05	-0.594
O88507	Ciliary neurotrophic factor receptor subunit alpha OS=Mus musculus GN=Cntfr PE=1 SV=2	CNTFR_MOUSE	Cntfr	0	0	1	0	0	0	0	0	0	0	0	0	0	0	0	0	0	0	0	0	0	0	0	0	6.29554e-05	-0.596	0	0.166667	0	#DIV/0!	3.3946e-05	-0.594
O88816	Serotonin N-acetyltransferase OS=Mus musculus GN=Aanat PE=2 SV=1	SNAT_MOUSE	Aanat Snat	0	0	1	0	0	0	0	0	0	0	0	0	0	0	0	0	0	0	0	0	0	0	0	0	6.29554e-05	-0.596	0	0.166667	0	#DIV/0!	3.3946e-05	-0.594
P0C7A0	KH homology domain-containing protein 1C OS=Mus musculus GN=Khdc1c PE=2 SV=1	KHD1B_MOUSE	Khdc1b	0	0	1	0	0	0	0	0	0	0	0	0	0	0	0	0	0	0	0	0	0	0	0	0	6.29554e-05	-0.596	0	0.166667	0	#DIV/0!	3.3946e-05	-0.594
P12023	Isoform APP751 of Amyloid beta A4 protein OS=Mus musculus GN=App	A4_MOUSE	App	0	0	1	0	0	0	0	0	0	0	0	0	0	0	0	0	0	0	0	0	0	0	0	0	6.29554e-05	-0.596	0	0.166667	0	#DIV/0!	3.3946e-05	-0.594
P17183	Gamma-enolase OS=Mus musculus GN=Eno2 PE=1 SV=2	ENOG_MOUSE	Eno2 Eno-2	0	0	1	0	0	0	0	0	0	0	0	0	0	0	0	0	0	0	0	0	0	0	0	0	6.29554e-05	-0.596	0	0.166667	0	#DIV/0!	3.3946e-05	-0.594
P20181	Neurotrophin-3 OS=Mus musculus GN=Ntf3 PE=1 SV=1	NTF3_MOUSE	Ntf3 Ntf-3	0	0	1	0	0	0	0	0	0	0	0	0	0	0	0	0	0	0	0	0	0	0	0	0	6.29554e-05	-0.596	0	0.166667	0	#DIV/0!	3.3946e-05	-0.594
P23607	Zinc finger autosomal protein OS=Mus musculus GN=Zfa PE=2 SV=1	ZFA_MOUSE	Zfa	0	0	1	0	0	0	0	0	0	0	0	0	0	0	0	0	0	0	0	0	0	0	0	0	6.29554e-05	-0.596	0	0.166667	0	#DIV/0!	3.3946e-05	-0.594
P25801	Rhombotin-2 OS=Mus musculus GN=Lmo2 PE=1 SV=1	RBTN2_MOUSE	Lmo2 Rbtn-2 Rbtn2 Rhom-2	0	0	1	0	0	0	0	0	0	0	0	0	0	0	0	0	0	0	0	0	0	0	0	0	6.29554e-05	-0.596	0	0.166667	0	#DIV/0!	3.3946e-05	-0.594
P34022	Ran-specific GTPase-activating protein OS=Mus musculus GN=Ranbp1 PE=1 SV=2	RANG_MOUSE	Ranbp1 Htf9-a Htf9a	0	0	1	0	0	0	0	0	0	0	0	0	0	0	0	0	0	0	0	0	0	0	0	0	6.29554e-05	-0.596	0	0.166667	0	#DIV/0!	3.3946e-05	-0.594
P39447	Tight junction protein ZO-1 OS=Mus musculus GN=Tjp1 PE=1 SV=2	ZO1_MOUSE	Tjp1 Zo1	0	0	1	0	0	0	0	0	0	0	0	0	0	0	0	0	0	0	0	0	0	0	0	0	6.29554e-05	-0.596	0	0.166667	0	#DIV/0!	3.3946e-05	-0.594
P48999	Arachidonate 5-lipoxygenase OS=Mus musculus GN=Alox5 PE=1 SV=3	LOX5_MOUSE	Alox5	0	0	1	0	0	0	0	0	0	0	0	0	0	0	0	0	0	0	0	0	0	0	0	0	6.29554e-05	-0.596	0	0.166667	0	#DIV/0!	3.3946e-05	-0.594
P51125	Isoform 7 of Calpastatin OS=Mus musculus GN=Cast	ICAL_MOUSE	Cast	0	0	1	0	0	0	0	0	0	0	0	0	0	0	0	0	0	0	0	0	0	0	0	0	6.29554e-05	-0.596	0	0.166667	0	#DIV/0!	3.3946e-05	-0.594
P55012	Solute carrier family 12 member 2 OS=Mus musculus GN=Slc12a2 PE=1 SV=2	S12A2_MOUSE	Slc12a2 Nkcc1	0	0	1	0	0	0	0	0	0	0	0	0	0	0	0	0	0	0	0	0	0	0	0	0	6.29554e-05	-0.596	0	0.166667	0	#DIV/0!	3.3946e-05	-0.594
P62281	40S ribosomal protein S11 OS=Mus musculus GN=Rps11 PE=1 SV=3	RS11_MOUSE	Rps11	0	0	1	0	0	0	0	0	0	0	0	0	0	0	0	0	0	0	0	0	0	0	0	0	6.29554e-05	-0.596	0	0.166667	0	#DIV/0!	3.3946e-05	-0.594
P70207	Plexin-A2 OS=Mus musculus GN=Plxna2 PE=1 SV=2	PLXA2_MOUSE	Plxna2 Kiaa0463	0	0	1	0	0	0	0	0	0	0	0	0	0	0	0	0	0	0	0	0	0	0	0	0	6.29554e-05	-0.596	0	0.166667	0	#DIV/0!	3.3946e-05	-0.594
P97868	E3 ubiquitin-protein ligase RBBP6 OS=Mus musculus GN=Rbbp6 PE=1 SV=5	RBBP6_MOUSE	Rbbp6 P2pr Pact	0	0	1	0	0	0	0	0	0	0	0	0	0	0	0	0	0	0	0	0	0	0	0	0	6.29554e-05	-0.596	0	0.166667	0	#DIV/0!	3.3946e-05	-0.594
P97875	Jun dimerization protein 2 OS=Mus musculus GN=Jdp2 PE=1 SV=2	JDP2_MOUSE	Jdp2 Jundm2	0	0	1	0	0	0	0	0	0	0	0	0	0	0	0	0	0	0	0	0	0	0	0	0	6.29554e-05	-0.596	0	0.166667	0	#DIV/0!	3.3946e-05	-0.594
P98078	Isoform p67 of Disabled homolog 2 OS=Mus musculus GN=Dab2	DAB2_MOUSE	Dab2 Doc2	0	0	1	0	0	0	0	0	0	0	0	0	0	0	0	0	0	0	0	0	0	0	0	0	6.29554e-05	-0.596	0	0.166667	0	#DIV/0!	3.3946e-05	-0.594
Q01965	T-lymphocyte surface antigen Ly-9 OS=Mus musculus GN=Ly9 PE=1 SV=2	LY9_MOUSE	Ly9 Ly-9	0	0	1	0	0	0	0	0	0	0	0	0	0	0	0	0	0	0	0	0	0	0	0	0	6.29554e-05	-0.596	0	0.166667	0	#DIV/0!	3.3946e-05	-0.594
Q0VDN7	RUN domain-containing protein 1 OS=Mus musculus GN=Rundc1 PE=2 SV=1	RUND1_MOUSE	Rundc1	0	0	1	0	0	0	0	0	0	0	0	0	0	0	0	0	0	0	0	0	0	0	0	0	6.29554e-05	-0.596	0	0.166667	0	#DIV/0!	3.3946e-05	-0.594
Q3TD16	Uncharacterized protein KIAA0226-like OS=Mus musculus GN=Kiaa0226l PE=1 SV=2	K226L_MOUSE	Kiaa0226l	0	0	1	0	0	0	0	0	0	0	0	0	0	0	0	0	0	0	0	0	0	0	0	0	6.29554e-05	-0.596	0	0.166667	0	#DIV/0!	3.3946e-05	-0.594
Q3U0P1	Isoform 2 of Partner and localizer of BRCA2 OS=Mus musculus GN=Palb2	PALB2_MOUSE	Palb2	0	0	1	0	0	0	0	0	0	0	0	0	0	0	0	0	0	0	0	0	0	0	0	0	6.29554e-05	-0.596	0	0.166667	0	#DIV/0!	3.3946e-05	-0.594
Q3U515	von Willebrand factor C and EGF domain-containing protein OS=Mus musculus GN=Vwce PE=2 SV=2	VWCE_MOUSE	Vwce	0	0	1	0	0	0	0	0	0	0	0	0	0	0	0	0	0	0	0	0	0	0	0	0	6.29554e-05	-0.596	0	0.166667	0	#DIV/0!	3.3946e-05	-0.594
Q3UE37	Ubiquitin-conjugating enzyme E2 Z OS=Mus musculus GN=Ube2z PE=2 SV=2	UBE2Z_MOUSE	Ube2z D11Moh35	0	0	1	0	0	0	0	0	0	0	0	0	0	0	0	0	0	0	0	0	0	0	0	0	6.29554e-05	-0.596	0	0.166667	0	#DIV/0!	3.3946e-05	-0.594
Q3UHC7	Isoform 4 of Disabled homolog 2-interacting protein OS=Mus musculus GN=Dab2ip	DAB2P_MOUSE	Dab2ip Kiaa1743	0	0	1	0	0	0	0	0	0	0	0	0	0	0	0	0	0	0	0	0	0	0	0	0	6.29554e-05	-0.596	0	0.166667	0	#DIV/0!	3.3946e-05	-0.594
Q3UHH8	Isoform 2 of Glucoside xylosyltransferase 1 OS=Mus musculus GN=Gxylt1	GXLT1_MOUSE	Gxylt1 Glt8d3 Gm87	0	0	1	0	0	0	0	0	0	0	0	0	0	0	0	0	0	0	0	0	0	0	0	0	6.29554e-05	-0.596	0	0.166667	0	#DIV/0!	3.3946e-05	-0.594
Q3UQU0	Bromodomain-containing protein 9 OS=Mus musculus GN=Brd9 PE=2 SV=1	BRD9_MOUSE	Brd9	0	0	1	0	0	0	0	0	0	0	0	0	0	0	0	0	0	0	0	0	0	0	0	0	6.29554e-05	-0.596	0	0.166667	0	#DIV/0!	3.3946e-05	-0.594
Q3UUJ4	Isoform 3 of STE20-related kinase adapter protein alpha OS=Mus musculus GN=Strada	STRAA_MOUSE	Strada Lyk5 Strad	0	0	1	0	0	0	0	0	0	0	0	0	0	0	0	0	0	0	0	0	0	0	0	0	6.29554e-05	-0.596	0	0.166667	0	#DIV/0!	3.3946e-05	-0.594
Q3UZZ6	Sulfotransferase 1 family member D1 OS=Mus musculus GN=Sult1d1 PE=1 SV=1	ST1D1_MOUSE	Sult1d1 St1d1	0	0	1	0	0	0	0	0	0	0	0	0	0	0	0	0	0	0	0	0	0	0	0	0	6.29554e-05	-0.596	0	0.166667	0	#DIV/0!	3.3946e-05	-0.594
Q5FWH2	Putative E3 ubiquitin-protein ligase UNKL OS=Mus musculus GN=Unkl PE=2 SV=2	UNKL_MOUSE	Unkl	0	0	1	0	0	0	0	0	0	0	0	0	0	0	0	0	0	0	0	0	0	0	0	0	6.29554e-05	-0.596	0	0.166667	0	#DIV/0!	3.3946e-05	-0.594
Q60760	Isoform 3 of Growth factor receptor-bound protein 10 OS=Mus musculus GN=Grb10	GRB10_MOUSE	Grb10 Meg1	0	0	1	0	0	0	0	0	0	0	0	0	0	0	0	0	0	0	0	0	0	0	0	0	6.29554e-05	-0.596	0	0.166667	0	#DIV/0!	3.3946e-05	-0.594
Q61418	H(+)/Cl(-) exchange transporter 4 OS=Mus musculus GN=Clcn4 PE=2 SV=2	CLCN4_MOUSE	Clcn4 Clc4 Clcn4-2	0	0	1	0	0	0	0	0	0	0	0	0	0	0	0	0	0	0	0	0	0	0	0	0	6.29554e-05	-0.596	0	0.166667	0	#DIV/0!	3.3946e-05	-0.594
Q6GQT9	Nodal modulator 1 OS=Mus musculus GN=Nomo1 PE=1 SV=1	NOMO1_MOUSE	Nomo1	0	0	1	0	0	0	0	0	0	0	0	0	0	0	0	0	0	0	0	0	0	0	0	0	6.29554e-05	-0.596	0	0.166667	0	#DIV/0!	3.3946e-05	-0.594
Q6JPI3	Mediator of RNA polymerase II transcription subunit 13-like OS=Mus musculus GN=Med13l PE=2 SV=2	MD13L_MOUSE	Med13l Kiaa1025 Thrap2 Trap240l	0	0	1	0	0	0	0	0	0	0	0	0	0	0	0	0	0	0	0	0	0	0	0	0	6.29554e-05	-0.596	0	0.166667	0	#DIV/0!	3.3946e-05	-0.594
Q6NVF0	Inositol polyphosphate 5-phosphatase OCRL-1 OS=Mus musculus GN=Ocrl PE=1 SV=1	OCRL_MOUSE	Ocrl	0	0	1	0	0	0	0	0	0	0	0	0	0	0	0	0	0	0	0	0	0	0	0	0	6.29554e-05	-0.596	0	0.166667	0	#DIV/0!	3.3946e-05	-0.594
Q6PDM2	Serine/arginine-rich splicing factor 1 OS=Mus musculus GN=Srsf1 PE=1 SV=3	SRSF1_MOUSE	Srsf1 Sfrs1	0	0	1	0	0	0	0	0	0	0	0	0	0	0	0	0	0	0	0	0	0	0	0	0	6.29554e-05	-0.596	0	0.166667	0	#DIV/0!	3.3946e-05	-0.594
Q6ZWV7	60S ribosomal protein L35 OS=Mus musculus GN=Rpl35 PE=2 SV=1	RL35_MOUSE	Rpl35	0	0	1	0	0	0	0	0	0	0	0	0	0	0	0	0	0	0	0	0	0	0	0	0	6.29554e-05	-0.596	0	0.166667	0	#DIV/0!	3.3946e-05	-0.594
Q7TQD2	Tubulin polymerization-promoting protein OS=Mus musculus GN=Tppp PE=1 SV=1	TPPP_MOUSE	Tppp	0	0	1	0	0	0	0	0	0	0	0	0	0	0	0	0	0	0	0	0	0	0	0	0	6.29554e-05	-0.596	0	0.166667	0	#DIV/0!	3.3946e-05	-0.594
Q7TST0	Isoform 2 of Butyrophilin-like protein 1 OS=Mus musculus GN=Btnl1	BTNL1_MOUSE	Btnl1 Btnl3 Gm316 Ng10	0	0	1	0	0	0	0	0	0	0	0	0	0	0	0	0	0	0	0	0	0	0	0	0	6.29554e-05	-0.596	0	0.166667	0	#DIV/0!	3.3946e-05	-0.594
Q8BG79	Isoform 2 of CWF19-like protein 2 OS=Mus musculus GN=Cwf19l2	C19L2_MOUSE	Cwf19l2	0	0	1	0	0	0	0	0	0	0	0	0	0	0	0	0	0	0	0	0	0	0	0	0	6.29554e-05	-0.596	0	0.166667	0	#DIV/0!	3.3946e-05	-0.594
Q8BHJ7	Gamma-aminobutyric acid receptor subunit alpha-5 OS=Mus musculus GN=Gabra5 PE=1 SV=1	GBRA5_MOUSE	Gabra5	0	0	1	0	0	0	0	0	0	0	0	0	0	0	0	0	0	0	0	0	0	0	0	0	6.29554e-05	-0.596	0	0.166667	0	#DIV/0!	3.3946e-05	-0.594
Q8BKW4-2	Isoform 2 of Zinc finger CCHC domain-containing protein 4 OS=Mus musculus GN=Zcchc4	ZCHC4_MOUSE	Zcchc4	0	0	1	0	0	0	0	0	0	0	0	0	0	0	0	0	0	0	0	0	0	0	0	0	6.29554e-05	-0.596	0	0.166667	0	#DIV/0!	3.3946e-05	-0.594
Q8BL74	General transcription factor 3C polypeptide 2 OS=Mus musculus GN=Gtf3c2 PE=2 SV=2	TF3C2_MOUSE	Gtf3c2 Kiaa0011	0	0	1	0	0	0	0	0	0	0	0	0	0	0	0	0	0	0	0	0	0	0	0	0	6.29554e-05	-0.596	0	0.166667	0	#DIV/0!	3.3946e-05	-0.594
Q8BUP8	Protein FAM43A OS=Mus musculus GN=Fam43a PE=2 SV=1	FA43A_MOUSE	Fam43a	0	0	1	0	0	0	0	0	0	0	0	0	0	0	0	0	0	0	0	0	0	0	0	0	6.29554e-05	-0.596	0	0.166667	0	#DIV/0!	3.3946e-05	-0.594
Q8BVI5	Syntaxin-16 OS=Mus musculus GN=Stx16 PE=1 SV=3	STX16_MOUSE	Stx16	0	0	1	0	0	0	0	0	0	0	0	0	0	0	0	0	0	0	0	0	0	0	0	0	6.29554e-05	-0.596	0	0.166667	0	#DIV/0!	3.3946e-05	-0.594
Q8BW88-3	Isoform 3 of Pleckstrin homology domain-containing family S member 1 OS=Mus musculus GN=Plekhs1	PKHS1_MOUSE	Plekhs1	0	0	1	0	0	0	0	0	0	0	0	0	0	0	0	0	0	0	0	0	0	0	0	0	6.29554e-05	-0.596	0	0.166667	0	#DIV/0!	3.3946e-05	-0.594
Q8BWQ4	Cap-specific mRNA (nucleoside-2'-O-)-methyltransferase 2 OS=Mus musculus GN=Cmtr2 PE=2 SV=1	CMTR2_MOUSE	Cmtr2 Ftsjd1	0	0	1	0	0	0	0	0	0	0	0	0	0	0	0	0	0	0	0	0	0	0	0	0	6.29554e-05	-0.596	0	0.166667	0	#DIV/0!	3.3946e-05	-0.594
Q8BZM0	Isoform 2 of Kelch-like protein 12 OS=Mus musculus GN=Klhl12	KLH12_MOUSE	Klhl12 C3ip1	0	0	1	0	0	0	0	0	0	0	0	0	0	0	0	0	0	0	0	0	0	0	0	0	6.29554e-05	-0.596	0	0.166667	0	#DIV/0!	3.3946e-05	-0.594
Q8C1B2	TCDD-inducible poly [ADP-ribose] polymerase OS=Mus musculus GN=Tiparp PE=2 SV=1	PARPT_MOUSE	Tiparp	0	0	1	0	0	0	0	0	0	0	0	0	0	0	0	0	0	0	0	0	0	0	0	0	6.29554e-05	-0.596	0	0.166667	0	#DIV/0!	3.3946e-05	-0.594
Q8C6S9	Uncharacterized protein C12orf55 homolog OS=Mus musculus PE=2 SV=3	CFA54_MOUSE	Cfap54	0	0	1	0	0	0	0	0	0	0	0	0	0	0	0	0	0	0	0	0	0	0	0	0	6.29554e-05	-0.596	0	0.166667	0	#DIV/0!	3.3946e-05	-0.594
Q8C7K6	Prenylcysteine oxidase-like OS=Mus musculus GN=Pcyox1l PE=2 SV=1	PCYXL_MOUSE	Pcyox1l	0	0	1	0	0	0	0	0	0	0	0	0	0	0	0	0	0	0	0	0	0	0	0	0	6.29554e-05	-0.596	0	0.166667	0	#DIV/0!	3.3946e-05	-0.594
Q8CCB5	Methyltransferase-like protein 24 OS=Mus musculus GN=Mettl24 PE=2 SV=1	MET24_MOUSE	Mettl24	0	0	1	0	0	0	0	0	0	0	0	0	0	0	0	0	0	0	0	0	0	0	0	0	6.29554e-05	-0.596	0	0.166667	0	#DIV/0!	3.3946e-05	-0.594
Q8CCH7	Isoform 2 of Zinc finger protein ZFPM2 OS=Mus musculus GN=Zfpm2	FOG2_MOUSE	Zfpm2 Fog2	0	0	1	0	0	0	0	0	0	0	0	0	0	0	0	0	0	0	0	0	0	0	0	0	6.29554e-05	-0.596	0	0.166667	0	#DIV/0!	3.3946e-05	-0.594
Q8CCP0	Isoform 2 of Nuclear export mediator factor Nemf OS=Mus musculus GN=Nemf	NEMF_MOUSE	Nemf Sdccag1	0	0	1	0	0	0	0	0	0	0	0	0	0	0	0	0	0	0	0	0	0	0	0	0	6.29554e-05	-0.596	0	0.166667	0	#DIV/0!	3.3946e-05	-0.594
Q8CE97	Uncharacterized protein C15orf62 homolog, mitochondrial OS=Mus musculus GN=Gm14137 PE=2 SV=2	CO062_MOUSE	Gm14137	0	0	1	0	0	0	0	0	0	0	0	0	0	0	0	0	0	0	0	0	0	0	0	0	6.29554e-05	-0.596	0	0.166667	0	#DIV/0!	3.3946e-05	-0.594
Q8R0X2	Isoform 2 of CDK2-associated and cullin domain-containing protein 1 OS=Mus musculus GN=Cacul1	CACL1_MOUSE	Cacul1	0	0	1	0	0	0	0	0	0	0	0	0	0	0	0	0	0	0	0	0	0	0	0	0	6.29554e-05	-0.596	0	0.166667	0	#DIV/0!	3.3946e-05	-0.594
Q8R1N0	Zinc finger protein 830 OS=Mus musculus GN=Znf830 PE=1 SV=1	ZN830_MOUSE	Znf830 Ccdc16 Omcg1 Zfp830	0	0	1	0	0	0	0	0	0	0	0	0	0	0	0	0	0	0	0	0	0	0	0	0	6.29554e-05	-0.596	0	0.166667	0	#DIV/0!	3.3946e-05	-0.594
Q8R4G9	Neuronal acetylcholine receptor subunit alpha-3 OS=Mus musculus GN=Chrna3 PE=2 SV=1	ACHA3_MOUSE	Chrna3	0	0	1	0	0	0	0	0	0	0	0	0	0	0	0	0	0	0	0	0	0	0	0	0	6.29554e-05	-0.596	0	0.166667	0	#DIV/0!	3.3946e-05	-0.594
Q8VC90	Isoform 2 of Probable palmitoyltransferase ZDHHC12 OS=Mus musculus GN=Zdhhc12	ZDH12_MOUSE	Zdhhc12	0	0	1	0	0	0	0	0	0	0	0	0	0	0	0	0	0	0	0	0	0	0	0	0	6.29554e-05	-0.596	0	0.166667	0	#DIV/0!	3.3946e-05	-0.594
Q8VCM5	Isoform 3 of Mitochondrial ubiquitin ligase activator of NFKB 1 OS=Mus musculus GN=Mul1	MUL1_MOUSE	Mul1 Gide	0	0	1	0	0	0	0	0	0	0	0	0	0	0	0	0	0	0	0	0	0	0	0	0	6.29554e-05	-0.596	0	0.166667	0	#DIV/0!	3.3946e-05	-0.594
Q91YD4	Transient receptor potential cation channel subfamily M member 2 OS=Mus musculus GN=Trpm2 PE=2 SV=1	TRPM2_MOUSE	Trpm2 Ltrpc2 Trpc7	0	0	1	0	0	0	0	0	0	0	0	0	0	0	0	0	0	0	0	0	0	0	0	0	6.29554e-05	-0.596	0	0.166667	0	#DIV/0!	3.3946e-05	-0.594
Q91YY4	ATP synthase mitochondrial F1 complex assembly factor 2 OS=Mus musculus GN=Atpaf2 PE=1 SV=1	ATPF2_MOUSE	Atpaf2	0	0	1	0	0	0	0	0	0	0	0	0	0	0	0	0	0	0	0	0	0	0	0	0	6.29554e-05	-0.596	0	0.166667	0	#DIV/0!	3.3946e-05	-0.594
Q920D7	Secretoglobin family 3A member 1 OS=Mus musculus GN=Scgb3a1 PE=2 SV=1	SG3A1_MOUSE	Scgb3a1 Hin1 Pnsp2 Ugrp2	0	0	1	0	0	0	0	0	0	0	0	0	0	0	0	0	0	0	0	0	0	0	0	0	6.29554e-05	-0.596	0	0.166667	0	#DIV/0!	3.3946e-05	-0.594
Q9CQS6	Gastrokine-2 OS=Mus musculus GN=Gkn2 PE=1 SV=1	GKN2_MOUSE	Gkn2 Blot	0	0	1	0	0	0	0	0	0	0	0	0	0	0	0	0	0	0	0	0	0	0	0	0	6.29554e-05	-0.596	0	0.166667	0	#DIV/0!	3.3946e-05	-0.594
Q9CR51	V-type proton ATPase subunit G 1 OS=Mus musculus GN=Atp6v1g1 PE=2 SV=3	VATG1_MOUSE	Atp6v1g1 Atp6g1	0	0	1	0	0	0	0	0	0	0	0	0	0	0	0	0	0	0	0	0	0	0	0	0	6.29554e-05	-0.596	0	0.166667	0	#DIV/0!	3.3946e-05	-0.594
Q9CR76	Transmembrane protein 186 OS=Mus musculus GN=Tmem186 PE=2 SV=2	TM186_MOUSE	Tmem186	0	0	1	0	0	0	0	0	0	0	0	0	0	0	0	0	0	0	0	0	0	0	0	0	6.29554e-05	-0.596	0	0.166667	0	#DIV/0!	3.3946e-05	-0.594
Q9CZD3	Glycine--tRNA ligase OS=Mus musculus GN=Gars PE=1 SV=1	SYG_MOUSE	Gars	0	0	1	0	0	0	0	0	0	0	0	0	0	0	0	0	0	0	0	0	0	0	0	0	6.29554e-05	-0.596	0	0.166667	0	#DIV/0!	3.3946e-05	-0.594
Q9D842-2	Isoform 2 of Aprataxin and PNK-like factor OS=Mus musculus GN=Aplf	APLF_MOUSE	Aplf	0	0	1	0	0	0	0	0	0	0	0	0	0	0	0	0	0	0	0	0	0	0	0	0	6.29554e-05	-0.596	0	0.166667	0	#DIV/0!	3.3946e-05	-0.594
Q9DCV3	Diacylglycerol O-acyltransferase 2 OS=Mus musculus GN=Dgat2 PE=1 SV=1	DGAT2_MOUSE	Dgat2	0	0	1	0	0	0	0	0	0	0	0	0	0	0	0	0	0	0	0	0	0	0	0	0	6.29554e-05	-0.596	0	0.166667	0	#DIV/0!	3.3946e-05	-0.594
Q9EQ80	Putative GTP cyclohydrolase 1 type 2 Nif3l1 OS=Mus musculus GN=Nif3l1 PE=1 SV=4	NIF3L_MOUSE	Nif3l1	0	0	1	0	0	0	0	0	0	0	0	0	0	0	0	0	0	0	0	0	0	0	0	0	6.29554e-05	-0.596	0	0.166667	0	#DIV/0!	3.3946e-05	-0.594
Q9ER74	Sal-like protein 1 OS=Mus musculus GN=Sall1 PE=2 SV=1	SALL1_MOUSE	Sall1 Sal3	0	0	1	0	0	0	0	0	0	0	0	0	0	0	0	0	0	0	0	0	0	0	0	0	6.29554e-05	-0.596	0	0.166667	0	#DIV/0!	3.3946e-05	-0.594
Q9ERU9	E3 SUMO-protein ligase RanBP2 OS=Mus musculus GN=Ranbp2 PE=1 SV=2	RBP2_MOUSE	Ranbp2	0	0	1	0	0	0	0	0	0	0	0	0	0	0	0	0	0	0	0	0	0	0	0	0	6.29554e-05	-0.596	0	0.166667	0	#DIV/0!	3.3946e-05	-0.594
Q9QZB6	Isoform 2 of Nuclear receptor subfamily 4 group A member 3 OS=Mus musculus GN=Nr4a3	NR4A3_MOUSE	Nr4a3 Tec	0	0	1	0	0	0	0	0	0	0	0	0	0	0	0	0	0	0	0	0	0	0	0	0	6.29554e-05	-0.596	0	0.166667	0	#DIV/0!	3.3946e-05	-0.594
Q9R087	Glypican-6 OS=Mus musculus GN=Gpc6 PE=1 SV=1	GPC6_MOUSE	Gpc6	0	0	1	0	0	0	0	0	0	0	0	0	0	0	0	0	0	0	0	0	0	0	0	0	6.29554e-05	-0.596	0	0.166667	0	#DIV/0!	3.3946e-05	-0.594
Q9WTS2	Alpha-(1,6)-fucosyltransferase OS=Mus musculus GN=Fut8 PE=2 SV=2	FUT8_MOUSE	Fut8	0	0	1	0	0	0	0	0	0	0	0	0	0	0	0	0	0	0	0	0	0	0	0	0	6.29554e-05	-0.596	0	0.166667	0	#DIV/0!	3.3946e-05	-0.594
Q9WV68	Peroxisomal 2,4-dienoyl-CoA reductase OS=Mus musculus GN=Decr2 PE=1 SV=1	DECR2_MOUSE	Decr2 Pdcr	0	0	1	0	0	0	0	0	0	0	0	0	0	0	0	0	0	0	0	0	0	0	0	0	6.29554e-05	-0.596	0	0.166667	0	#DIV/0!	3.3946e-05	-0.594
Q9WVM1	Rac GTPase-activating protein 1 OS=Mus musculus GN=Racgap1 PE=2 SV=1	RGAP1_MOUSE	Racgap1 Mgcracgap	0	0	1	0	0	0	0	0	0	0	0	0	0	0	0	0	0	0	0	0	0	0	0	0	6.29554e-05	-0.596	0	0.166667	0	#DIV/0!	3.3946e-05	-0.594
Q9Z315	U4/U6.U5 tri-snRNP-associated protein 1 OS=Mus musculus GN=Sart1 PE=2 SV=1	SNUT1_MOUSE	Sart1 Haf	0	0	1	0	0	0	0	0	0	0	0	0	0	0	0	0	0	0	0	0	0	0	0	0	6.29554e-05	-0.596	0	0.166667	0	#DIV/0!	3.3946e-05	-0.594
A2RSQ1	Isoform 2 of Beta-galactosidase-1-like protein 3 OS=Mus musculus GN=Glb1l3	GLBL3_MOUSE	Glb1l3	0	0	0	1	0	0	0	0	0	0	0	0	0	0	0	0	0	0	0	0	0	0	0	0	0.0244441	-0.673	0	0.166667	0	#DIV/0!	0.0135202	-0.671
E9Q5K9	Isoform 3 of YTH domain-containing protein 1 OS=Mus musculus GN=Ythdc1	YTDC1_MOUSE	Ythdc1 Kiaa1966	0	0	0	1	0	0	0	0	0	0	0	0	0	0	0	0	0	0	0	0	0	0	0	0	0.0244441	-0.673	0	0.166667	0	#DIV/0!	0.0135202	-0.671
O08532	Isoform 2E of Voltage-dependent calcium channel subunit alpha-2/delta-1 OS=Mus musculus GN=Cacna2d1	CA2D1_MOUSE	Cacna2d1 Cacna2	0	0	0	1	0	0	0	0	0	0	0	0	0	0	0	0	0	0	0	0	0	0	0	0	0.0244441	-0.673	0	0.166667	0	#DIV/0!	0.0135202	-0.671
O35451	Cyclic AMP-dependent transcription factor ATF-6 beta OS=Mus musculus GN=Atf6b PE=2 SV=1	ATF6B_MOUSE	Atf6b Crebl1	0	0	0	1	0	0	0	0	0	0	0	0	0	0	0	0	0	0	0	0	0	0	0	0	0.0244441	-0.673	0	0.166667	0	#DIV/0!	0.0135202	-0.671
O35737	Heterogeneous nuclear ribonucleoprotein H2 OS=Mus musculus GN=Hnrnph2 PE=2 SV=1	HNRH1_MOUSE	Hnrnph1 Hnrph Hnrph1	0	0	0	1	0	0	0	0	0	0	0	0	0	0	0	0	0	0	0	0	0	0	0	0	0.0244441	-0.673	0	0.166667	0	#DIV/0!	0.0135202	-0.671
O54865	Guanylate cyclase soluble subunit beta-1 OS=Mus musculus GN=Gucy1b3 PE=2 SV=1	GCYB1_MOUSE	Gucy1b3	0	0	0	1	0	0	0	0	0	0	0	0	0	0	0	0	0	0	0	0	0	0	0	0	0.0244441	-0.673	0	0.166667	0	#DIV/0!	0.0135202	-0.671
O88543	COP9 signalosome complex subunit 3 OS=Mus musculus GN=Cops3 PE=1 SV=3	CSN3_MOUSE	Cops3 Csn3	0	0	0	1	0	0	0	0	0	0	0	0	0	0	0	0	0	0	0	0	0	0	0	0	0.0244441	-0.673	0	0.166667	0	#DIV/0!	0.0135202	-0.671
P04443	Hemoglobin subunit beta-H1 OS=Mus musculus GN=Hbb-bh1 PE=2 SV=3	HBB0_MOUSE	Hbb-bh0	0	0	0	1	0	0	0	0	0	0	0	0	0	0	0	0	0	0	0	0	0	0	0	0	0.0244441	-0.673	0	0.166667	0	#DIV/0!	0.0135202	-0.671
P11103	Isoform 2 of Poly [ADP-ribose] polymerase 1 OS=Mus musculus GN=Parp1	PARP1_MOUSE	Parp1 Adprp Adprt Adprt1	0	0	0	1	0	0	0	0	0	0	0	0	0	0	0	0	0	0	0	0	0	0	0	0	0.0244441	-0.673	0	0.166667	0	#DIV/0!	0.0135202	-0.671
P25206	DNA replication licensing factor MCM3 OS=Mus musculus GN=Mcm3 PE=1 SV=2	MCM3_MOUSE	Mcm3 Mcmd Mcmd3	0	0	0	1	0	0	0	0	0	0	0	0	0	0	0	0	0	0	0	0	0	0	0	0	0.0244441	-0.673	0	0.166667	0	#DIV/0!	0.0135202	-0.671
P28661	Isoform 4 of Septin-4 OS=Mus musculus GN=Sept4	SEPT4_MOUSE	Sept4 Pnutl2	0	0	0	1	0	0	0	0	0	0	0	0	0	0	0	0	0	0	0	0	0	0	0	0	0.0244441	-0.673	0	0.166667	0	#DIV/0!	0.0135202	-0.671
P30730	Lutropin-choriogonadotropic hormone receptor OS=Mus musculus GN=Lhcgr PE=2 SV=1	LSHR_MOUSE	Lhcgr Lhr	0	0	0	1	0	0	0	0	0	0	0	0	0	0	0	0	0	0	0	0	0	0	0	0	0.0244441	-0.673	0	0.166667	0	#DIV/0!	0.0135202	-0.671
P51830	Adenylate cyclase type 9 OS=Mus musculus GN=Adcy9 PE=1 SV=1	ADCY9_MOUSE	Adcy9	0	0	0	1	0	0	0	0	0	0	0	0	0	0	0	0	0	0	0	0	0	0	0	0	0.0244441	-0.673	0	0.166667	0	#DIV/0!	0.0135202	-0.671
P55937	Isoform 1 of Golgin subfamily A member 3 OS=Mus musculus GN=Golga3	GOGA3_MOUSE	Golga3 Mea2	0	0	0	1	0	0	0	0	0	0	0	0	0	0	0	0	0	0	0	0	0	0	0	0	0.0244441	-0.673	0	0.166667	0	#DIV/0!	0.0135202	-0.671
Q06335	Isoform 2 of Amyloid-like protein 2 OS=Mus musculus GN=Aplp2	APLP2_MOUSE	Aplp2	0	0	0	1	0	0	0	0	0	0	0	0	0	0	0	0	0	0	0	0	0	0	0	0	0.0244441	-0.673	0	0.166667	0	#DIV/0!	0.0135202	-0.671
Q1H9T6	Zinc finger and BTB domain-containing protein 48 OS=Mus musculus GN=Zbtb48 PE=1 SV=1	ZBT48_MOUSE	Zbtb48 Hkr3	0	0	0	1	0	0	0	0	0	0	0	0	0	0	0	0	0	0	0	0	0	0	0	0	0.0244441	-0.673	0	0.166667	0	#DIV/0!	0.0135202	-0.671
Q3TXX3	Isoform 2 of Protrudin OS=Mus musculus GN=Zfyve27	ZFY27_MOUSE	Zfyve27	0	0	0	1	0	0	0	0	0	0	0	0	0	0	0	0	0	0	0	0	0	0	0	0	0.0244441	-0.673	0	0.166667	0	#DIV/0!	0.0135202	-0.671
Q3U1T9-4	Isoform 4 of DENN domain-containing protein 1B OS=Mus musculus GN=Dennd1b	DEN1B_MOUSE	Dennd1b	0	0	0	1	0	0	0	0	0	0	0	0	0	0	0	0	0	0	0	0	0	0	0	0	0.0244441	-0.673	0	0.166667	0	#DIV/0!	0.0135202	-0.671
Q3UH66	Isoform 7 of Serine/threonine-protein kinase WNK2 OS=Mus musculus GN=Wnk2	WNK2_MOUSE	Wnk2 Kiaa1760	0	0	0	1	0	0	0	0	0	0	0	0	0	0	0	0	0	0	0	0	0	0	0	0	0.0244441	-0.673	0	0.166667	0	#DIV/0!	0.0135202	-0.671
Q3UW55	WAP four-disulfide core domain protein 6A OS=Mus musculus GN=Wfdc6a PE=2 SV=1	WFC6A_MOUSE	Wfdc6a Gm122	0	0	0	1	0	0	0	0	0	0	0	0	0	0	0	0	0	0	0	0	0	0	0	0	0.0244441	-0.673	0	0.166667	0	#DIV/0!	0.0135202	-0.671
Q4ZJN1	Isoform 2 of Complement C1q and tumor necrosis factor-related protein 9 OS=Mus musculus GN=C1qtnf9	C1QT9_MOUSE	C1qtnf9	0	0	0	1	0	0	0	0	0	0	0	0	0	0	0	0	0	0	0	0	0	0	0	0	0.0244441	-0.673	0	0.166667	0	#DIV/0!	0.0135202	-0.671
Q5SVQ0	Isoform 5 of Histone acetyltransferase KAT7 OS=Mus musculus GN=Kat7	KAT7_MOUSE	Kat7 Hbo1 Myst2	0	0	0	1	0	0	0	0	0	0	0	0	0	0	0	0	0	0	0	0	0	0	0	0	0.0244441	-0.673	0	0.166667	0	#DIV/0!	0.0135202	-0.671
Q60649	Caseinolytic peptidase B protein homolog OS=Mus musculus GN=Clpb PE=1 SV=1	CLPB_MOUSE	Clpb Skd3	0	0	0	1	0	0	0	0	0	0	0	0	0	0	0	0	0	0	0	0	0	0	0	0	0.0244441	-0.673	0	0.166667	0	#DIV/0!	0.0135202	-0.671
Q61501	Transcription factor E2F1 OS=Mus musculus GN=E2f1 PE=1 SV=1	E2F1_MOUSE	E2f1	0	0	0	1	0	0	0	0	0	0	0	0	0	0	0	0	0	0	0	0	0	0	0	0	0.0244441	-0.673	0	0.166667	0	#DIV/0!	0.0135202	-0.671
Q640L3	Isoform 3 of Cell cycle progression protein 1 OS=Mus musculus GN=Ccpg1	CCPG1_MOUSE	Ccpg1	0	0	0	1	0	0	0	0	0	0	0	0	0	0	0	0	0	0	0	0	0	0	0	0	0.0244441	-0.673	0	0.166667	0	#DIV/0!	0.0135202	-0.671
Q64487	Isoform I of Receptor-type tyrosine-protein phosphatase delta OS=Mus musculus GN=Ptprd	PTPRD_MOUSE	Ptprd	0	0	0	1	0	0	0	0	0	0	0	0	0	0	0	0	0	0	0	0	0	0	0	0	0.0244441	-0.673	0	0.166667	0	#DIV/0!	0.0135202	-0.671
Q66LM6	Isoform 2 of Protein FAM170A OS=Mus musculus GN=Fam170a	F170A_MOUSE	Fam170a Gm93 Znfd	0	0	0	1	0	0	0	0	0	0	0	0	0	0	0	0	0	0	0	0	0	0	0	0	0.0244441	-0.673	0	0.166667	0	#DIV/0!	0.0135202	-0.671
Q6P5C7	Zinc finger protein 728 OS=Mus musculus GN=Znf728 PE=2 SV=1	ZN728_MOUSE	Znf728 Zfp458	0	0	0	1	0	0	0	0	0	0	0	0	0	0	0	0	0	0	0	0	0	0	0	0	0.0244441	-0.673	0	0.166667	0	#DIV/0!	0.0135202	-0.671
Q6P9L6	Kinesin-like protein KIF15 OS=Mus musculus GN=Kif15 PE=1 SV=1	KIF15_MOUSE	Kif15 Klp2 Knsl7	0	0	0	1	0	0	0	0	0	0	0	0	0	0	0	0	0	0	0	0	0	0	0	0	0.0244441	-0.673	0	0.166667	0	#DIV/0!	0.0135202	-0.671
Q6PAJ1	Breakpoint cluster region protein OS=Mus musculus GN=Bcr PE=1 SV=3	BCR_MOUSE	Bcr Kiaa3017	0	0	0	1	0	0	0	0	0	0	0	0	0	0	0	0	0	0	0	0	0	0	0	0	0.0244441	-0.673	0	0.166667	0	#DIV/0!	0.0135202	-0.671
Q6PD03	Serine/threonine-protein phosphatase 2A 56 kDa regulatory subunit alpha isoform OS=Mus musculus GN=Ppp2r5a PE=2 SV=1	2A5A_MOUSE	Ppp2r5a	0	0	0	1	0	0	0	0	0	0	0	0	0	0	0	0	0	0	0	0	0	0	0	0	0.0244441	-0.673	0	0.166667	0	#DIV/0!	0.0135202	-0.671
Q6PGF7	Exocyst complex component 8 OS=Mus musculus GN=Exoc8 PE=1 SV=1	EXOC8_MOUSE	Exoc8	0	0	0	1	0	0	0	0	0	0	0	0	0	0	0	0	0	0	0	0	0	0	0	0	0.0244441	-0.673	0	0.166667	0	#DIV/0!	0.0135202	-0.671
Q6X1Y6	Acid-sensing ion channel 3 OS=Mus musculus GN=Asic3 PE=1 SV=2	ASIC3_MOUSE	Asic3 Accn3 Drasic	0	0	0	1	0	0	0	0	0	0	0	0	0	0	0	0	0	0	0	0	0	0	0	0	0.0244441	-0.673	0	0.166667	0	#DIV/0!	0.0135202	-0.671
Q6ZPI0	Protein Jade-1 OS=Mus musculus GN=Jade1 PE=1 SV=2	JADE1_MOUSE	Jade1 Kiaa1807 Phf17	0	0	0	1	0	0	0	0	0	0	0	0	0	0	0	0	0	0	0	0	0	0	0	0	0.0244441	-0.673	0	0.166667	0	#DIV/0!	0.0135202	-0.671
Q80U30	Isoform 4 of Protein CLEC16A OS=Mus musculus GN=Clec16a	CL16A_MOUSE	Clec16a Kiaa0350	0	0	0	1	0	0	0	0	0	0	0	0	0	0	0	0	0	0	0	0	0	0	0	0	0.0244441	-0.673	0	0.166667	0	#DIV/0!	0.0135202	-0.671
Q80VL3	Prickle-like protein 3 OS=Mus musculus GN=Prickle3 PE=2 SV=1	PRIC3_MOUSE	Prickle3 Lmo6	0	0	0	1	0	0	0	0	0	0	0	0	0	0	0	0	0	0	0	0	0	0	0	0	0.0244441	-0.673	0	0.166667	0	#DIV/0!	0.0135202	-0.671
Q80YA3	Isoform 2 of Phospholipase DDHD1 OS=Mus musculus GN=Ddhd1	DDHD1_MOUSE	Ddhd1	0	0	0	1	0	0	0	0	0	0	0	0	0	0	0	0	0	0	0	0	0	0	0	0	0.0244441	-0.673	0	0.166667	0	#DIV/0!	0.0135202	-0.671
Q8BGT6	Isoform 2 of MICAL-like protein 1 OS=Mus musculus GN=Micall1	MILK1_MOUSE	Micall1 D15Mit260 Kiaa1668 Mirab13	0	0	0	1	0	0	0	0	0	0	0	0	0	0	0	0	0	0	0	0	0	0	0	0	0.0244441	-0.673	0	0.166667	0	#DIV/0!	0.0135202	-0.671
Q8BKH7	Isoform 3 of Target of rapamycin complex 2 subunit MAPKAP1 OS=Mus musculus GN=Mapkap1	SIN1_MOUSE	Mapkap1 Mip1 Sin1	0	0	0	1	0	0	0	0	0	0	0	0	0	0	0	0	0	0	0	0	0	0	0	0	0.0244441	-0.673	0	0.166667	0	#DIV/0!	0.0135202	-0.671
Q8BQZ4	Ral GTPase-activating protein subunit beta OS=Mus musculus GN=Ralgapb PE=1 SV=2	RLGPB_MOUSE	Ralgapb Kiaa1219	0	0	0	1	0	0	0	0	0	0	0	0	0	0	0	0	0	0	0	0	0	0	0	0	0.0244441	-0.673	0	0.166667	0	#DIV/0!	0.0135202	-0.671
Q8BTW8	CDK5 regulatory subunit-associated protein 1 OS=Mus musculus GN=Cdk5rap1 PE=2 SV=2	CK5P1_MOUSE	Cdk5rap1	0	0	0	1	0	0	0	0	0	0	0	0	0	0	0	0	0	0	0	0	0	0	0	0	0.0244441	-0.673	0	0.166667	0	#DIV/0!	0.0135202	-0.671
Q8BVW0	Isoform 2 of Neutral alpha-glucosidase C OS=Mus musculus GN=Ganc	GANC_MOUSE	Ganc	0	0	0	1	0	0	0	0	0	0	0	0	0	0	0	0	0	0	0	0	0	0	0	0	0.0244441	-0.673	0	0.166667	0	#DIV/0!	0.0135202	-0.671
Q8BZ03	Serine/threonine-protein kinase D2 OS=Mus musculus GN=Prkd2 PE=1 SV=1	KPCD2_MOUSE	Prkd2	0	0	0	1	0	0	0	0	0	0	0	0	0	0	0	0	0	0	0	0	0	0	0	0	0.0244441	-0.673	0	0.166667	0	#DIV/0!	0.0135202	-0.671
Q8C7H1	Methylmalonic aciduria type A homolog, mitochondrial OS=Mus musculus GN=Mmaa PE=2 SV=1	MMAA_MOUSE	Mmaa	0	0	0	1	0	0	0	0	0	0	0	0	0	0	0	0	0	0	0	0	0	0	0	0	0.0244441	-0.673	0	0.166667	0	#DIV/0!	0.0135202	-0.671
Q8CG46	Isoform 2 of Structural maintenance of chromosomes protein 5 OS=Mus musculus GN=Smc5	SMC5_MOUSE	Smc5 Kiaa0594 Smc5l1	0	0	0	1	0	0	0	0	0	0	0	0	0	0	0	0	0	0	0	0	0	0	0	0	0.0244441	-0.673	0	0.166667	0	#DIV/0!	0.0135202	-0.671
Q8CHW4	Translation initiation factor eIF-2B subunit epsilon OS=Mus musculus GN=Eif2b5 PE=1 SV=1	EI2BE_MOUSE	Eif2b5	0	0	0	1	0	0	0	0	0	0	0	0	0	0	0	0	0	0	0	0	0	0	0	0	0.0244441	-0.673	0	0.166667	0	#DIV/0!	0.0135202	-0.671
Q8CJ19	Protein-methionine sulfoxide oxidase MICAL3 OS=Mus musculus GN=Mical3 PE=2 SV=2	MICA3_MOUSE	Mical3 Kiaa0819 Kiaa1364	0	0	0	1	0	0	0	0	0	0	0	0	0	0	0	0	0	0	0	0	0	0	0	0	0.0244441	-0.673	0	0.166667	0	#DIV/0!	0.0135202	-0.671
Q8R4Y4	Isoform 2 of Stabilin-1 OS=Mus musculus GN=Stab1	STAB1_MOUSE	Stab1 Feel1	0	0	0	1	0	0	0	0	0	0	0	0	0	0	0	0	0	0	0	0	0	0	0	0	0.0244441	-0.673	0	0.166667	0	#DIV/0!	0.0135202	-0.671
Q8VCZ9	Probable proline dehydrogenase 2 OS=Mus musculus GN=Prodh2 PE=1 SV=1	PROD2_MOUSE	Prodh2	0	0	0	1	0	0	0	0	0	0	0	0	0	0	0	0	0	0	0	0	0	0	0	0	0.0244441	-0.673	0	0.166667	0	#DIV/0!	0.0135202	-0.671
Q8VDB2	Dol-P-Man:Man(7)GlcNAc(2)-PP-Dol alpha-1,6-mannosyltransferase OS=Mus musculus GN=Alg12 PE=2 SV=2	ALG12_MOUSE	Alg12	0	0	0	1	0	0	0	0	0	0	0	0	0	0	0	0	0	0	0	0	0	0	0	0	0.0244441	-0.673	0	0.166667	0	#DIV/0!	0.0135202	-0.671
Q8VHE0	Translocation protein SEC63 homolog OS=Mus musculus GN=Sec63 PE=2 SV=4	SEC63_MOUSE	Sec63 Sec63l	0	0	0	1	0	0	0	0	0	0	0	0	0	0	0	0	0	0	0	0	0	0	0	0	0.0244441	-0.673	0	0.166667	0	#DIV/0!	0.0135202	-0.671
Q91Z96	BMP-2-inducible protein kinase OS=Mus musculus GN=Bmp2k PE=1 SV=1	BMP2K_MOUSE	Bmp2k Bike	0	0	0	1	0	0	0	0	0	0	0	0	0	0	0	0	0	0	0	0	0	0	0	0	0.0244441	-0.673	0	0.166667	0	#DIV/0!	0.0135202	-0.671
Q91ZB0	Alpha-protein kinase 2 OS=Mus musculus GN=Alpk2 PE=2 SV=3	ALPK2_MOUSE	Alpk2 Hak	0	0	0	1	0	0	0	0	0	0	0	0	0	0	0	0	0	0	0	0	0	0	0	0	0.0244441	-0.673	0	0.166667	0	#DIV/0!	0.0135202	-0.671
Q921K9	Isoform 2 of B-cell CLL/lymphoma 7 protein family member B OS=Mus musculus GN=Bcl7b	BCL7B_MOUSE	Bcl7b	0	0	0	1	0	0	0	0	0	0	0	0	0	0	0	0	0	0	0	0	0	0	0	0	0.0244441	-0.673	0	0.166667	0	#DIV/0!	0.0135202	-0.671
Q99KU1	Isoform 2 of Dehydrodolichyl diphosphate synthase OS=Mus musculus GN=Dhdds	DHDDS_MOUSE	Dhdds	0	0	0	1	0	0	0	0	0	0	0	0	0	0	0	0	0	0	0	0	0	0	0	0	0.0244441	-0.673	0	0.166667	0	#DIV/0!	0.0135202	-0.671
Q99P58	Ras-related protein Rab-27B OS=Mus musculus GN=Rab27b PE=1 SV=3	RB27B_MOUSE	Rab27b	0	0	0	1	0	0	0	0	0	0	0	0	0	0	0	0	0	0	0	0	0	0	0	0	0.0244441	-0.673	0	0.166667	0	#DIV/0!	0.0135202	-0.671
Q9CR61	NADH dehydrogenase [ubiquinone] 1 beta subcomplex subunit 7 OS=Mus musculus GN=Ndufb7 PE=1 SV=3	NDUB7_MOUSE	Ndufb7	0	0	0	1	0	0	0	0	0	0	0	0	0	0	0	0	0	0	0	0	0	0	0	0	0.0244441	-0.673	0	0.166667	0	#DIV/0!	0.0135202	-0.671
Q9CR86	Calcium-regulated heat stable protein 1 OS=Mus musculus GN=Carhsp1 PE=1 SV=1	CHSP1_MOUSE	Carhsp1	0	0	0	1	0	0	0	0	0	0	0	0	0	0	0	0	0	0	0	0	0	0	0	0	0.0244441	-0.673	0	0.166667	0	#DIV/0!	0.0135202	-0.671
Q9D5R2	WD repeat-containing protein 20 OS=Mus musculus GN=Wdr20 PE=2 SV=1	WDR20_MOUSE	Wdr20 Wdr20b Wdr20rt	0	0	0	1	0	0	0	0	0	0	0	0	0	0	0	0	0	0	0	0	0	0	0	0	0.0244441	-0.673	0	0.166667	0	#DIV/0!	0.0135202	-0.671
Q9D5V5	Cullin-5 OS=Mus musculus GN=Cul5 PE=1 SV=3	CUL5_MOUSE	Cul5	0	0	0	1	0	0	0	0	0	0	0	0	0	0	0	0	0	0	0	0	0	0	0	0	0.0244441	-0.673	0	0.166667	0	#DIV/0!	0.0135202	-0.671
Q9DB85	Ribosomal RNA-processing protein 8 OS=Mus musculus GN=Rrp8 PE=1 SV=1	RRP8_MOUSE	Rrp8	0	0	0	1	0	0	0	0	0	0	0	0	0	0	0	0	0	0	0	0	0	0	0	0	0.0244441	-0.673	0	0.166667	0	#DIV/0!	0.0135202	-0.671
Q9EPK5	Isoform 2 of WW domain-containing transcription regulator protein 1 OS=Mus musculus GN=Wwtr1	WWTR1_MOUSE	Wwtr1 Taz	0	0	0	1	0	0	0	0	0	0	0	0	0	0	0	0	0	0	0	0	0	0	0	0	0.0244441	-0.673	0	0.166667	0	#DIV/0!	0.0135202	-0.671
Q9EQK5	Major vault protein OS=Mus musculus GN=Mvp PE=1 SV=4	MVP_MOUSE	Mvp	0	0	0	1	0	0	0	0	0	0	0	0	0	0	0	0	0	0	0	0	0	0	0	0	0.0244441	-0.673	0	0.166667	0	#DIV/0!	0.0135202	-0.671
Q9ES64	Isoform 2 of Harmonin OS=Mus musculus GN=Ush1c	USH1C_MOUSE	Ush1c	0	0	0	1	0	0	0	0	0	0	0	0	0	0	0	0	0	0	0	0	0	0	0	0	0.0244441	-0.673	0	0.166667	0	#DIV/0!	0.0135202	-0.671
Q9JMD3	PCTP-like protein OS=Mus musculus GN=Stard10 PE=1 SV=1	PCTL_MOUSE	Stard10 Pctpl Sdccag28 Sdccagg28	0	0	0	1	0	0	0	0	0	0	0	0	0	0	0	0	0	0	0	0	0	0	0	0	0.0244441	-0.673	0	0.166667	0	#DIV/0!	0.0135202	-0.671
Q9QXE2	DNA polymerase lambda OS=Mus musculus GN=Poll PE=2 SV=1	DPOLL_MOUSE	Poll Polk	0	0	0	1	0	0	0	0	0	0	0	0	0	0	0	0	0	0	0	0	0	0	0	0	0.0244441	-0.673	0	0.166667	0	#DIV/0!	0.0135202	-0.671
Q9WTU3	Isoform 5 of Sodium channel protein type 8 subunit alpha OS=Mus musculus GN=Scn8a	SCN8A_MOUSE	Scn8a Nbna1	0	0	0	1	0	0	0	0	0	0	0	0	0	0	0	0	0	0	0	0	0	0	0	0	0.0244441	-0.673	0	0.166667	0	#DIV/0!	0.0135202	-0.671
Q9WVL5	MORC family CW-type zinc finger protein 1 OS=Mus musculus GN=Morc1 PE=2 SV=1	MORC1_MOUSE	Morc1 Morc	0	0	0	1	0	0	0	0	0	0	0	0	0	0	0	0	0	0	0	0	0	0	0	0	0.0244441	-0.673	0	0.166667	0	#DIV/0!	0.0135202	-0.671
B2RUI1	Zinc finger protein 551 OS=Mus musculus GN=Znf551 PE=2 SV=2	ZN551_MOUSE	Znf551 Zfp551	0	0	0	0	1	0	0	0	0	0	0	0	0	0	0	0	0	0	0	0	0	0	0	0	0.00196224	-0.561	0	0.166667	0	#DIV/0!	0.00104842	0
O08915	AH receptor-interacting protein OS=Mus musculus GN=Aip PE=1 SV=1	AIP_MOUSE	Aip	0	0	0	0	1	0	0	0	0	0	0	0	0	0	0	0	0	0	0	0	0	0	0	0	0.00196224	-0.561	0	0.166667	0	#DIV/0!	0.00104842	0
O55047-3	Isoform 3 of Serine/threonine-protein kinase tousled-like 2 OS=Mus musculus GN=Tlk2	TLK2_MOUSE	Tlk2 Tlk	0	0	0	0	1	0	0	0	0	0	0	0	0	0	0	0	0	0	0	0	0	0	0	0	0.00196224	-0.561	0	0.166667	0	#DIV/0!	0.00104842	0
O55143	Isoform 2 of Sarcoplasmic/endoplasmic reticulum calcium ATPase 2 OS=Mus musculus GN=Atp2a2	AT2A2_MOUSE	Atp2a2	0	0	0	0	1	0	0	0	0	0	0	0	0	0	0	0	0	0	0	0	0	0	0	0	0.00196224	-0.561	0	0.166667	0	#DIV/0!	0.00104842	0
O70176	Pituitary adenylate cyclase-activating polypeptide OS=Mus musculus GN=Adcyap1 PE=2 SV=1	PACA_MOUSE	Adcyap1 Pacap	0	0	0	0	1	0	0	0	0	0	0	0	0	0	0	0	0	0	0	0	0	0	0	0	0.00196224	-0.561	0	0.166667	0	#DIV/0!	0.00104842	0
O70325	Phospholipid hydroperoxide glutathione peroxidase, nuclear OS=Mus musculus GN=Gpx4 PE=2 SV=3	GPX41_MOUSE	Gpx4	0	0	0	0	1	0	0	0	0	0	0	0	0	0	0	0	0	0	0	0	0	0	0	0	0.00196224	-0.561	0	0.166667	0	#DIV/0!	0.00104842	0
O88736	3-keto-steroid reductase OS=Mus musculus GN=Hsd17b7 PE=2 SV=1	DHB7_MOUSE	Hsd17b7	0	0	0	0	1	0	0	0	0	0	0	0	0	0	0	0	0	0	0	0	0	0	0	0	0.00196224	-0.561	0	0.166667	0	#DIV/0!	0.00104842	0
P11928	Inactive 2'-5'-oligoadenylate synthase 1B OS=Mus musculus GN=Oas1b PE=1 SV=3	OAS1A_MOUSE	Oas1a Oias1	0	0	0	0	1	0	0	0	0	0	0	0	0	0	0	0	0	0	0	0	0	0	0	0	0.00196224	-0.561	0	0.166667	0	#DIV/0!	0.00104842	0
P18762	Beta-2 adrenergic receptor OS=Mus musculus GN=Adrb2 PE=2 SV=2	ADRB2_MOUSE	Adrb2 Adrb2r	0	0	0	0	1	0	0	0	0	0	0	0	0	0	0	0	0	0	0	0	0	0	0	0	0.00196224	-0.561	0	0.166667	0	#DIV/0!	0.00104842	0
P58459	Isoform 3 of A disintegrin and metalloproteinase with thrombospondin motifs 10 OS=Mus musculus GN=Adamts10	ATS10_MOUSE	Adamts10	0	0	0	0	1	0	0	0	0	0	0	0	0	0	0	0	0	0	0	0	0	0	0	0	0.00196224	-0.561	0	0.166667	0	#DIV/0!	0.00104842	0
P61168	Isoform 2 of D(2) dopamine receptor OS=Mus musculus GN=Drd2	DRD2_MOUSE	Drd2	0	0	0	0	1	0	0	0	0	0	0	0	0	0	0	0	0	0	0	0	0	0	0	0	0.00196224	-0.561	0	0.166667	0	#DIV/0!	0.00104842	0
P62267	40S ribosomal protein S23 OS=Mus musculus GN=Rps23 PE=1 SV=3	RS23_MOUSE	Rps23	0	0	0	0	1	0	0	0	0	0	0	0	0	0	0	0	0	0	0	0	0	0	0	0	0.00196224	-0.561	0	0.166667	0	#DIV/0!	0.00104842	0
P70224	GTPase IMAP family member 1 OS=Mus musculus GN=Gimap1 PE=1 SV=3	GIMA1_MOUSE	Gimap1 Imap1 Imap38	0	0	0	0	1	0	0	0	0	0	0	0	0	0	0	0	0	0	0	0	0	0	0	0	0.00196224	-0.561	0	0.166667	0	#DIV/0!	0.00104842	0
P70349	Histidine triad nucleotide-binding protein 1 OS=Mus musculus GN=Hint1 PE=1 SV=3	HINT1_MOUSE	Hint1 Hint Pkci Pkci1 Prkcnh1	0	0	0	0	1	0	0	0	0	0	0	0	0	0	0	0	0	0	0	0	0	0	0	0	0.00196224	-0.561	0	0.166667	0	#DIV/0!	0.00104842	0
Q03173	Isoform 6 of Protein enabled homolog OS=Mus musculus GN=Enah	ENAH_MOUSE	Enah Mena Ndpp1	0	0	0	0	1	0	0	0	0	0	0	0	0	0	0	0	0	0	0	0	0	0	0	0	0.00196224	-0.561	0	0.166667	0	#DIV/0!	0.00104842	0
Q05920	Pyruvate carboxylase, mitochondrial OS=Mus musculus GN=Pc PE=1 SV=1	PYC_MOUSE	Pc Pcx	0	0	0	0	1	0	0	0	0	0	0	0	0	0	0	0	0	0	0	0	0	0	0	0	0.00196224	-0.561	0	0.166667	0	#DIV/0!	0.00104842	0
Q0P5X1	Isoform 2 of Leucine-rich repeat and IQ domain-containing protein 1 OS=Mus musculus GN=Lrriq1	LRIQ1_MOUSE	Lrriq1	0	0	0	0	1	0	0	0	0	0	0	0	0	0	0	0	0	0	0	0	0	0	0	0	0.00196224	-0.561	0	0.166667	0	#DIV/0!	0.00104842	0
Q14B71	Cell division cycle-associated protein 2 OS=Mus musculus GN=Cdca2 PE=2 SV=2	CDCA2_MOUSE	Cdca2	0	0	0	0	1	0	0	0	0	0	0	0	0	0	0	0	0	0	0	0	0	0	0	0	0.00196224	-0.561	0	0.166667	0	#DIV/0!	0.00104842	0
Q3U595	UPF0545 protein C22orf39 homolog OS=Mus musculus PE=2 SV=1	CV039_MOUSE	0	0	0	0	0	1	0	0	0	0	0	0	0	0	0	0	0	0	0	0	0	0	0	0	0	0.00196224	-0.561	0	0.166667	0	#DIV/0!	0.00104842	0
Q3V384	Lactation elevated protein 1 OS=Mus musculus GN=Lace1 PE=2 SV=1	LACE1_MOUSE	Lace1	0	0	0	0	1	0	0	0	0	0	0	0	0	0	0	0	0	0	0	0	0	0	0	0	0.00196224	-0.561	0	0.166667	0	#DIV/0!	0.00104842	0
Q3V3Q7	Phosphofurin acidic cluster sorting protein 1 OS=Mus musculus GN=Pacs1 PE=2 SV=2	PACS2_MOUSE	Pacs2 Kiaa0602 Pacs1l	0	0	0	0	1	0	0	0	0	0	0	0	0	0	0	0	0	0	0	0	0	0	0	0	0.00196224	-0.561	0	0.166667	0	#DIV/0!	0.00104842	0
Q4KUS2	Protein unc-13 homolog A OS=Mus musculus GN=Unc13a PE=1 SV=3	UN13A_MOUSE	Unc13a	0	0	0	0	1	0	0	0	0	0	0	0	0	0	0	0	0	0	0	0	0	0	0	0	0.00196224	-0.561	0	0.166667	0	#DIV/0!	0.00104842	0
Q4KWH5-3	Isoform 3 of 1-phosphatidylinositol 4,5-bisphosphate phosphodiesterase eta-1 OS=Mus musculus GN=Plch1	PLCH1_MOUSE	Plch1 Kiaa1069 Plcl3	0	0	0	0	1	0	0	0	0	0	0	0	0	0	0	0	0	0	0	0	0	0	0	0	0.00196224	-0.561	0	0.166667	0	#DIV/0!	0.00104842	0
Q5HZG4	Transcription initiation factor TFIID subunit 3 OS=Mus musculus GN=Taf3 PE=1 SV=2	TAF3_MOUSE	Taf3	0	0	0	0	1	0	0	0	0	0	0	0	0	0	0	0	0	0	0	0	0	0	0	0	0.00196224	-0.561	0	0.166667	0	#DIV/0!	0.00104842	0
Q5HZJ0	Ribonuclease 3 OS=Mus musculus GN=Drosha PE=1 SV=1	RNC_MOUSE	Drosha Etohi2 Rn3 Rnasen	0	0	0	0	1	0	0	0	0	0	0	0	0	0	0	0	0	0	0	0	0	0	0	0	0.00196224	-0.561	0	0.166667	0	#DIV/0!	0.00104842	0
Q5SSW2	Proteasome activator complex subunit 4 OS=Mus musculus GN=Psme4 PE=1 SV=1	PSME4_MOUSE	Psme4 Kiaa0077	0	0	0	0	1	0	0	0	0	0	0	0	0	0	0	0	0	0	0	0	0	0	0	0	0.00196224	-0.561	0	0.166667	0	#DIV/0!	0.00104842	0
Q60687	Follitropin subunit beta OS=Mus musculus GN=Fshb PE=2 SV=1	FSHB_MOUSE	Fshb	0	0	0	0	1	0	0	0	0	0	0	0	0	0	0	0	0	0	0	0	0	0	0	0	0.00196224	-0.561	0	0.166667	0	#DIV/0!	0.00104842	0
Q61578	NADPH:adrenodoxin oxidoreductase, mitochondrial OS=Mus musculus GN=Fdxr PE=2 SV=1	ADRO_MOUSE	Fdxr	0	0	0	0	1	0	0	0	0	0	0	0	0	0	0	0	0	0	0	0	0	0	0	0	0.00196224	-0.561	0	0.166667	0	#DIV/0!	0.00104842	0
Q61599	Rho GDP-dissociation inhibitor 2 OS=Mus musculus GN=Arhgdib PE=1 SV=3	GDIR2_MOUSE	Arhgdib Gdid4	0	0	0	0	1	0	0	0	0	0	0	0	0	0	0	0	0	0	0	0	0	0	0	0	0.00196224	-0.561	0	0.166667	0	#DIV/0!	0.00104842	0
Q61666	Isoform 3 of Protein HIRA OS=Mus musculus GN=Hira	HIRA_MOUSE	Hira Tuple1	0	0	0	0	1	0	0	0	0	0	0	0	0	0	0	0	0	0	0	0	0	0	0	0	0.00196224	-0.561	0	0.166667	0	#DIV/0!	0.00104842	0
Q61909	Protein CBFA2T1 OS=Mus musculus GN=Runx1t1 PE=2 SV=1	MTG8_MOUSE	Runx1t1 Cbfa2t1 Cbfa2t1h Mtg8	0	0	0	0	1	0	0	0	0	0	0	0	0	0	0	0	0	0	0	0	0	0	0	0	0.00196224	-0.561	0	0.166667	0	#DIV/0!	0.00104842	0
Q69ZC8	GPALPP motifs-containing protein 1 OS=Mus musculus GN=Gpalpp1 PE=1 SV=2	GPAM1_MOUSE	Gpalpp1 Kiaa1704	0	0	0	0	1	0	0	0	0	0	0	0	0	0	0	0	0	0	0	0	0	0	0	0	0.00196224	-0.561	0	0.166667	0	#DIV/0!	0.00104842	0
Q6NVD0	FRAS1-related extracellular matrix protein 2 OS=Mus musculus GN=Frem2 PE=2 SV=2	FREM2_MOUSE	Frem2 Nv1	0	0	0	0	1	0	0	0	0	0	0	0	0	0	0	0	0	0	0	0	0	0	0	0	0.00196224	-0.561	0	0.166667	0	#DIV/0!	0.00104842	0
Q6P6J4	Alpha-ketoglutarate-dependent dioxygenase alkB homolog 2 OS=Mus musculus GN=Alkbh2 PE=1 SV=1	ALKB2_MOUSE	Alkbh2 Abh2	0	0	0	0	1	0	0	0	0	0	0	0	0	0	0	0	0	0	0	0	0	0	0	0	0.00196224	-0.561	0	0.166667	0	#DIV/0!	0.00104842	0
Q6P6L0	Isoform 3 of Filamin A-interacting protein 1-like OS=Mus musculus GN=Filip1l	FIL1L_MOUSE	Filip1l Doc1	0	0	0	0	1	0	0	0	0	0	0	0	0	0	0	0	0	0	0	0	0	0	0	0	0.00196224	-0.561	0	0.166667	0	#DIV/0!	0.00104842	0
Q6PDM4	Coiled-coil domain-containing protein 36 OS=Mus musculus GN=Ccdc36 PE=2 SV=3	CCD36_MOUSE	Ccdc36	0	0	0	0	1	0	0	0	0	0	0	0	0	0	0	0	0	0	0	0	0	0	0	0	0.00196224	-0.561	0	0.166667	0	#DIV/0!	0.00104842	0
Q80WG7	E3 ubiquitin-protein ligase Trim36 OS=Mus musculus GN=Trim36 PE=1 SV=2	TRI36_MOUSE	Trim36	0	0	0	0	1	0	0	0	0	0	0	0	0	0	0	0	0	0	0	0	0	0	0	0	0.00196224	-0.561	0	0.166667	0	#DIV/0!	0.00104842	0
Q80XK6	Autophagy-related protein 2 homolog B OS=Mus musculus GN=Atg2b PE=1 SV=3	ATG2B_MOUSE	Atg2b	0	0	0	0	1	0	0	0	0	0	0	0	0	0	0	0	0	0	0	0	0	0	0	0	0.00196224	-0.561	0	0.166667	0	#DIV/0!	0.00104842	0
Q812A2	SLIT-ROBO Rho GTPase-activating protein 1 OS=Mus musculus GN=Srgap1 PE=1 SV=2	SRGP3_MOUSE	Srgap3 Arhgap14 Kiaa0411 Srgap2	0	0	0	0	1	0	0	0	0	0	0	0	0	0	0	0	0	0	0	0	0	0	0	0	0.00196224	-0.561	0	0.166667	0	#DIV/0!	0.00104842	0
Q8BGH7	CDC42 small effector protein 2 OS=Mus musculus GN=Cdc42se2 PE=1 SV=1	C42S2_MOUSE	Cdc42se2	0	0	0	0	1	0	0	0	0	0	0	0	0	0	0	0	0	0	0	0	0	0	0	0	0.00196224	-0.561	0	0.166667	0	#DIV/0!	0.00104842	0
Q8BHE1	Gem-associated protein 8 OS=Mus musculus GN=Gemin8 PE=1 SV=1	GEMI8_MOUSE	Gemin8 Fam51a1	0	0	0	0	1	0	0	0	0	0	0	0	0	0	0	0	0	0	0	0	0	0	0	0	0.00196224	-0.561	0	0.166667	0	#DIV/0!	0.00104842	0
Q8BHS3	Pre-mRNA-splicing factor RBM22 OS=Mus musculus GN=Rbm22 PE=1 SV=1	RBM22_MOUSE	Rbm22	0	0	0	0	1	0	0	0	0	0	0	0	0	0	0	0	0	0	0	0	0	0	0	0	0.00196224	-0.561	0	0.166667	0	#DIV/0!	0.00104842	0
Q8BIP0	Aspartate--tRNA ligase, mitochondrial OS=Mus musculus GN=Dars2 PE=2 SV=1	SYDM_MOUSE	Dars2	0	0	0	0	1	0	0	0	0	0	0	0	0	0	0	0	0	0	0	0	0	0	0	0	0.00196224	-0.561	0	0.166667	0	#DIV/0!	0.00104842	0
Q8BKZ9	Pyruvate dehydrogenase protein X component, mitochondrial OS=Mus musculus GN=Pdhx PE=1 SV=1	ODPX_MOUSE	Pdhx	0	0	0	0	1	0	0	0	0	0	0	0	0	0	0	0	0	0	0	0	0	0	0	0	0.00196224	-0.561	0	0.166667	0	#DIV/0!	0.00104842	0
Q8BMP4	G-protein coupled estrogen receptor 1 OS=Mus musculus GN=Gper1 PE=1 SV=2	GPER1_MOUSE	Gper1 Cmkrl2 Gper Gpr30	0	0	0	0	1	0	0	0	0	0	0	0	0	0	0	0	0	0	0	0	0	0	0	0	0.00196224	-0.561	0	0.166667	0	#DIV/0!	0.00104842	0
Q8BR86	Isoform 4 of Kin of IRRE-like protein 3 OS=Mus musculus GN=Kirrel3	KIRR3_MOUSE	Kirrel3 Kiaa1867	0	0	0	0	1	0	0	0	0	0	0	0	0	0	0	0	0	0	0	0	0	0	0	0	0.00196224	-0.561	0	0.166667	0	#DIV/0!	0.00104842	0
Q8BYB9	Protein O-glucosyltransferase 1 OS=Mus musculus GN=Poglut1 PE=1 SV=2	PGLT1_MOUSE	Poglut1 Clp46 Ktelc1	0	0	0	0	1	0	0	0	0	0	0	0	0	0	0	0	0	0	0	0	0	0	0	0	0.00196224	-0.561	0	0.166667	0	#DIV/0!	0.00104842	0
Q8BYC6	Serine/threonine-protein kinase TAO3 OS=Mus musculus GN=Taok3 PE=1 SV=2	TAOK3_MOUSE	Taok3	0	0	0	0	1	0	0	0	0	0	0	0	0	0	0	0	0	0	0	0	0	0	0	0	0.00196224	-0.561	0	0.166667	0	#DIV/0!	0.00104842	0
Q8C010	Probable G-protein coupled receptor 61 OS=Mus musculus GN=Gpr61 PE=2 SV=2	GPR61_MOUSE	Gpr61	0	0	0	0	1	0	0	0	0	0	0	0	0	0	0	0	0	0	0	0	0	0	0	0	0.00196224	-0.561	0	0.166667	0	#DIV/0!	0.00104842	0
Q8C052	Microtubule-associated protein 1S OS=Mus musculus GN=Map1s PE=1 SV=2	MAP1S_MOUSE	Map1s Bpy2ip1 Map8 Mtap1s	0	0	0	0	1	0	0	0	0	0	0	0	0	0	0	0	0	0	0	0	0	0	0	0	0.00196224	-0.561	0	0.166667	0	#DIV/0!	0.00104842	0
Q8CDJ3	Beclin 1-associated autophagy-related key regulator OS=Mus musculus GN=Atg14 PE=1 SV=1	BAKOR_MOUSE	Atg14 Atg14L D14Ertd436e Kiaa0831	0	0	0	0	1	0	0	0	0	0	0	0	0	0	0	0	0	0	0	0	0	0	0	0	0.00196224	-0.561	0	0.166667	0	#DIV/0!	0.00104842	0
Q8K2C7	Isoform 2 of Protein OS-9 OS=Mus musculus GN=Os9	OS9_MOUSE	Os9	0	0	0	0	1	0	0	0	0	0	0	0	0	0	0	0	0	0	0	0	0	0	0	0	0.00196224	-0.561	0	0.166667	0	#DIV/0!	0.00104842	0
Q8VD98	Killer cell lectin-like receptor subfamily B member 1F OS=Mus musculus GN=Klrb1f PE=2 SV=1	KLRBF_MOUSE	Klrb1f Nkrp1f	0	0	0	0	1	0	0	0	0	0	0	0	0	0	0	0	0	0	0	0	0	0	0	0	0.00196224	-0.561	0	0.166667	0	#DIV/0!	0.00104842	0
Q8VHL1	Histone-lysine N-methyltransferase SETD7 OS=Mus musculus GN=Setd7 PE=2 SV=2	SETD7_MOUSE	Setd7 Kiaa1717 Set7 Set9	0	0	0	0	1	0	0	0	0	0	0	0	0	0	0	0	0	0	0	0	0	0	0	0	0.00196224	-0.561	0	0.166667	0	#DIV/0!	0.00104842	0
Q91VH2	Sorting nexin-9 OS=Mus musculus GN=Snx9 PE=1 SV=1	SNX9_MOUSE	Snx9	0	0	0	0	1	0	0	0	0	0	0	0	0	0	0	0	0	0	0	0	0	0	0	0	0.00196224	-0.561	0	0.166667	0	#DIV/0!	0.00104842	0
Q920B0	FERM domain-containing protein 4B OS=Mus musculus GN=Frmd4b PE=1 SV=2	FRM4B_MOUSE	Frmd4b	0	0	0	0	1	0	0	0	0	0	0	0	0	0	0	0	0	0	0	0	0	0	0	0	0.00196224	-0.561	0	0.166667	0	#DIV/0!	0.00104842	0
Q99PV0	Pre-mRNA-processing-splicing factor 8 OS=Mus musculus GN=Prpf8 PE=1 SV=2	PRP8_MOUSE	Prpf8 Prp8	0	0	0	0	1	0	0	0	0	0	0	0	0	0	0	0	0	0	0	0	0	0	0	0	0.00196224	-0.561	0	0.166667	0	#DIV/0!	0.00104842	0
Q9CVD2	Ataxin-3 OS=Mus musculus GN=Atxn3 PE=1 SV=2	ATX3_MOUSE	Atxn3 Mjd	0	0	0	0	1	0	0	0	0	0	0	0	0	0	0	0	0	0	0	0	0	0	0	0	0.00196224	-0.561	0	0.166667	0	#DIV/0!	0.00104842	0
Q9D3R6	Isoform 3 of Katanin p60 ATPase-containing subunit A-like 2 OS=Mus musculus GN=Katnal2	KATL2_MOUSE	Katnal2	0	0	0	0	1	0	0	0	0	0	0	0	0	0	0	0	0	0	0	0	0	0	0	0	0.00196224	-0.561	0	0.166667	0	#DIV/0!	0.00104842	0
Q9D5W4	Coiled-coil domain-containing protein 81 OS=Mus musculus GN=Ccdc81 PE=2 SV=1	CCD81_MOUSE	Ccdc81	0	0	0	0	1	0	0	0	0	0	0	0	0	0	0	0	0	0	0	0	0	0	0	0	0.00196224	-0.561	0	0.166667	0	#DIV/0!	0.00104842	0
Q9D8F1	Isoform 2 of Alpha-ketoglutarate-dependent dioxygenase alkB homolog 4 OS=Mus musculus GN=Alkbh4	ALKB4_MOUSE	Alkbh4	0	0	0	0	1	0	0	0	0	0	0	0	0	0	0	0	0	0	0	0	0	0	0	0	0.00196224	-0.561	0	0.166667	0	#DIV/0!	0.00104842	0
Q9D9M0	Serine protease 52 OS=Mus musculus GN=Prss52 PE=2 SV=2	PRS52_MOUSE	Prss52 Tesp3	0	0	0	0	1	0	0	0	0	0	0	0	0	0	0	0	0	0	0	0	0	0	0	0	0.00196224	-0.561	0	0.166667	0	#DIV/0!	0.00104842	0
Q9DAK9	14 kDa phosphohistidine phosphatase OS=Mus musculus GN=Phpt1 PE=2 SV=1	PHP14_MOUSE	Phpt1 Php14	0	0	0	0	1	0	0	0	0	0	0	0	0	0	0	0	0	0	0	0	0	0	0	0	0.00196224	-0.561	0	0.166667	0	#DIV/0!	0.00104842	0
Q9DBM1	G patch domain-containing protein 1 OS=Mus musculus GN=Gpatch1 PE=2 SV=1	GPTC1_MOUSE	Gpatch1 Gpatc1	0	0	0	0	1	0	0	0	0	0	0	0	0	0	0	0	0	0	0	0	0	0	0	0	0.00196224	-0.561	0	0.166667	0	#DIV/0!	0.00104842	0
Q9ET80	Junctophilin-1 OS=Mus musculus GN=Jph1 PE=2 SV=1	JPH1_MOUSE	Jph1 Jp1	0	0	0	0	1	0	0	0	0	0	0	0	0	0	0	0	0	0	0	0	0	0	0	0	0.00196224	-0.561	0	0.166667	0	#DIV/0!	0.00104842	0
Q9JI11	Serine/threonine-protein kinase 4 OS=Mus musculus GN=Stk4 PE=1 SV=1	STK4_MOUSE	Stk4 Mst1	0	0	0	0	1	0	0	0	0	0	0	0	0	0	0	0	0	0	0	0	0	0	0	0	0.00196224	-0.561	0	0.166667	0	#DIV/0!	0.00104842	0
Q9JI38	tRNA pseudouridine(38/39) synthase OS=Mus musculus GN=Pus3 PE=1 SV=2	PUS3_MOUSE	Pus3	0	0	0	0	1	0	0	0	0	0	0	0	0	0	0	0	0	0	0	0	0	0	0	0	0.00196224	-0.561	0	0.166667	0	#DIV/0!	0.00104842	0
Q9QUM7	MutS protein homolog 5 OS=Mus musculus GN=Msh5 PE=2 SV=1	MSH5_MOUSE	Msh5	0	0	0	0	1	0	0	0	0	0	0	0	0	0	0	0	0	0	0	0	0	0	0	0	0.00196224	-0.561	0	0.166667	0	#DIV/0!	0.00104842	0
Q9Z1N6	Secreted frizzled-related sequence protein 4 OS=Mus musculus GN=Sfrp4 PE=2 SV=1	SFRP4_MOUSE	Sfrp4	0	0	0	0	1	0	0	0	0	0	0	0	0	0	0	0	0	0	0	0	0	0	0	0	0.00196224	-0.561	0	0.166667	0	#DIV/0!	0.00104842	0
Q9Z1R2	Large proline-rich protein BAG6 OS=Mus musculus GN=Bag6 PE=1 SV=1	BAG6_MOUSE	Bag6 Bat3	0	0	0	0	1	0	0	0	0	0	0	0	0	0	0	0	0	0	0	0	0	0	0	0	0.00196224	-0.561	0	0.166667	0	#DIV/0!	0.00104842	0
Q9Z2L7	Isoform 2 of Cytokine receptor-like factor 3 OS=Mus musculus GN=Crlf3	CRLF3_MOUSE	Crlf3 Creme9 Cytor4	0	0	0	0	1	0	0	0	0	0	0	0	0	0	0	0	0	0	0	0	0	0	0	0	0.00196224	-0.561	0	0.166667	0	#DIV/0!	0.00104842	0
F7A4A7	Isoform 2 of Otogelin-like protein OS=Mus musculus GN=Otogl	OTOGL_MOUSE	Otogl	0	0	0	0	0	1	0	0	0	0	0	0	0	0	0	0	0	0	0	0	0	0	0	0	0.00715955	-0.64	0	0.166667	0	#DIV/0!	0.00391197	-0.637
P00493	Hypoxanthine-guanine phosphoribosyltransferase OS=Mus musculus GN=Hprt1 PE=1 SV=3	HPRT_MOUSE	Hprt1 Hprt	0	0	0	0	0	1	0	0	0	0	0	0	0	0	0	0	0	0	0	0	0	0	0	0	0.00715955	-0.64	0	0.166667	0	#DIV/0!	0.00391197	-0.637
P03976	Ig kappa chain V-II region 17S29.1 OS=Mus musculus PE=1 SV=1	KV2A5_MOUSE	0	0	0	0	0	0	1	0	0	0	0	0	0	0	0	0	0	0	0	0	0	0	0	0	0	0.00715955	-0.64	0	0.166667	0	#DIV/0!	0.00391197	-0.637
P11531	Dystrophin OS=Mus musculus GN=Dmd PE=1 SV=3	DMD_MOUSE	Dmd	0	0	0	0	0	1	0	0	0	0	0	0	0	0	0	0	0	0	0	0	0	0	0	0	0.00715955	-0.64	0	0.166667	0	#DIV/0!	0.00391197	-0.637
P26443	Glutamate dehydrogenase 1, mitochondrial OS=Mus musculus GN=Glud1 PE=1 SV=1	DHE3_MOUSE	Glud1 Glud	0	0	0	0	0	1	0	0	0	0	0	0	0	0	0	0	0	0	0	0	0	0	0	0	0.00715955	-0.64	0	0.166667	0	#DIV/0!	0.00391197	-0.637
P35689	DNA repair protein complementing XP-G cells homolog OS=Mus musculus GN=Ercc5 PE=1 SV=4	ERCC5_MOUSE	Ercc5 Ercc-5 Xpg	0	0	0	0	0	1	0	0	0	0	0	0	0	0	0	0	0	0	0	0	0	0	0	0	0.00715955	-0.64	0	0.166667	0	#DIV/0!	0.00391197	-0.637
P49446	Isoform 3 of Receptor-type tyrosine-protein phosphatase epsilon OS=Mus musculus GN=Ptpre	PTPRE_MOUSE	Ptpre Ptpe	0	0	0	0	0	1	0	0	0	0	0	0	0	0	0	0	0	0	0	0	0	0	0	0	0.00715955	-0.64	0	0.166667	0	#DIV/0!	0.00391197	-0.637
P59999	Actin-related protein 2/3 complex subunit 4 OS=Mus musculus GN=Arpc4 PE=1 SV=3	ARPC4_MOUSE	Arpc4 Arc20	0	0	0	0	0	1	0	0	0	0	0	0	0	0	0	0	0	0	0	0	0	0	0	0	0.00715955	-0.64	0	0.166667	0	#DIV/0!	0.00391197	-0.637
P62900	60S ribosomal protein L31 OS=Mus musculus GN=Rpl31 PE=1 SV=1	RL31_MOUSE	Rpl31	0	0	0	0	0	1	0	0	0	0	0	0	0	0	0	0	0	0	0	0	0	0	0	0	0.00715955	-0.64	0	0.166667	0	#DIV/0!	0.00391197	-0.637
P63158	High mobility group protein B1 OS=Mus musculus GN=Hmgb1 PE=1 SV=2	HMGB1_MOUSE	Hmgb1 Hmg-1 Hmg1	0	0	0	0	0	1	0	0	0	0	0	0	0	0	0	0	0	0	0	0	0	0	0	0	0.00715955	-0.64	0	0.166667	0	#DIV/0!	0.00391197	-0.637
P70343	Caspase-4 OS=Mus musculus GN=Casp4 PE=1 SV=2	CASP4_MOUSE	Casp4 Casp11 Caspl Ich3	0	0	0	0	0	1	0	0	0	0	0	0	0	0	0	0	0	0	0	0	0	0	0	0	0.00715955	-0.64	0	0.166667	0	#DIV/0!	0.00391197	-0.637
P80560	Receptor-type tyrosine-protein phosphatase N2 OS=Mus musculus GN=Ptprn2 PE=1 SV=2	PTPR2_MOUSE	Ptprn2	0	0	0	0	0	1	0	0	0	0	0	0	0	0	0	0	0	0	0	0	0	0	0	0	0.00715955	-0.64	0	0.166667	0	#DIV/0!	0.00391197	-0.637
Q00731	Vascular endothelial growth factor A OS=Mus musculus GN=Vegfa PE=2 SV=2	VEGFA_MOUSE	Vegfa Vegf	0	0	0	0	0	1	0	0	0	0	0	0	0	0	0	0	0	0	0	0	0	0	0	0	0.00715955	-0.64	0	0.166667	0	#DIV/0!	0.00391197	-0.637
Q3TPX4	Exocyst complex component 5 OS=Mus musculus GN=Exoc5 PE=1 SV=2	EXOC5_MOUSE	Exoc5 Sec10l1	0	0	0	0	0	1	0	0	0	0	0	0	0	0	0	0	0	0	0	0	0	0	0	0	0.00715955	-0.64	0	0.166667	0	#DIV/0!	0.00391197	-0.637
Q5U4C1	G-protein coupled receptor-associated sorting protein 1 OS=Mus musculus GN=Gprasp1 PE=1 SV=1	GASP1_MOUSE	Gprasp1 Kiaa0443	0	0	0	0	0	1	0	0	0	0	0	0	0	0	0	0	0	0	0	0	0	0	0	0	0.00715955	-0.64	0	0.166667	0	#DIV/0!	0.00391197	-0.637
Q61495	Desmoglein-1-beta OS=Mus musculus GN=Dsg1b PE=1 SV=1	DSG1A_MOUSE	Dsg1a Dsg1	0	0	0	0	0	1	0	0	0	0	0	0	0	0	0	0	0	0	0	0	0	0	0	0	0.00715955	-0.64	0	0.166667	0	#DIV/0!	0.00391197	-0.637
Q63739	Protein tyrosine phosphatase type IVA 1 OS=Mus musculus GN=Ptp4a1 PE=1 SV=1	TP4A1_MOUSE	Ptp4a1 Prl1	0	0	0	0	0	1	0	0	0	0	0	0	0	0	0	0	0	0	0	0	0	0	0	0	0.00715955	-0.64	0	0.166667	0	#DIV/0!	0.00391197	-0.637
Q64441	1,25-dihydroxyvitamin D(3) 24-hydroxylase, mitochondrial OS=Mus musculus GN=Cyp24a1 PE=2 SV=1	CP24A_MOUSE	Cyp24a1 Cyp-24 Cyp24	0	0	0	0	0	1	0	0	0	0	0	0	0	0	0	0	0	0	0	0	0	0	0	0	0.00715955	-0.64	0	0.166667	0	#DIV/0!	0.00391197	-0.637
Q6P5D4	Centrosomal protein of 135 kDa OS=Mus musculus GN=Cep135 PE=1 SV=1	CP135_MOUSE	Cep135 Cep4 Kiaa0635	0	0	0	0	0	1	0	0	0	0	0	0	0	0	0	0	0	0	0	0	0	0	0	0	0.00715955	-0.64	0	0.166667	0	#DIV/0!	0.00391197	-0.637
Q6PCL9	Poly(A) polymerase gamma OS=Mus musculus GN=Papolg PE=1 SV=1	PAPOG_MOUSE	Papolg	0	0	0	0	0	1	0	0	0	0	0	0	0	0	0	0	0	0	0	0	0	0	0	0	0.00715955	-0.64	0	0.166667	0	#DIV/0!	0.00391197	-0.637
Q6PD05	Zinc finger protein 821 OS=Mus musculus GN=Znf821 PE=2 SV=2	ZN821_MOUSE	Znf821 Zfp821	0	0	0	0	0	1	0	0	0	0	0	0	0	0	0	0	0	0	0	0	0	0	0	0	0.00715955	-0.64	0	0.166667	0	#DIV/0!	0.00391197	-0.637
Q6PGB8	Isoform 2 of Probable global transcription activator SNF2L1 OS=Mus musculus GN=Smarca1	SMCA1_MOUSE	Smarca1 Snf2l	0	0	0	0	0	1	0	0	0	0	0	0	0	0	0	0	0	0	0	0	0	0	0	0	0.00715955	-0.64	0	0.166667	0	#DIV/0!	0.00391197	-0.637
Q7TN37	Isoform 3 of Transient receptor potential cation channel subfamily M member 4 OS=Mus musculus GN=Trpm4	TRPM4_MOUSE	Trpm4 Ltrpc4	0	0	0	0	0	1	0	0	0	0	0	0	0	0	0	0	0	0	0	0	0	0	0	0	0.00715955	-0.64	0	0.166667	0	#DIV/0!	0.00391197	-0.637
Q7TSH4	Centriolar coiled-coil protein of 110 kDa OS=Mus musculus GN=Ccp110 PE=1 SV=1	CP110_MOUSE	Ccp110 Cep110 Cp110 Kiaa0419	0	0	0	0	0	1	0	0	0	0	0	0	0	0	0	0	0	0	0	0	0	0	0	0	0.00715955	-0.64	0	0.166667	0	#DIV/0!	0.00391197	-0.637
Q80X80	C2 domain-containing protein 2-like OS=Mus musculus GN=C2cd2l PE=1 SV=3	C2C2L_MOUSE	C2cd2l Tmem24	0	0	0	0	0	1	0	0	0	0	0	0	0	0	0	0	0	0	0	0	0	0	0	0	0.00715955	-0.64	0	0.166667	0	#DIV/0!	0.00391197	-0.637
Q80ZQ3	Uncharacterized protein C8orf74 homolog OS=Mus musculus PE=2 SV=1	CH074_MOUSE	0	0	0	0	0	0	1	0	0	0	0	0	0	0	0	0	0	0	0	0	0	0	0	0	0	0.00715955	-0.64	0	0.166667	0	#DIV/0!	0.00391197	-0.637
Q811W1	Alanine and arginine-rich domain-containing protein OS=Mus musculus GN=Aard PE=2 SV=1	AARD_MOUSE	Aard	0	0	0	0	0	1	0	0	0	0	0	0	0	0	0	0	0	0	0	0	0	0	0	0	0.00715955	-0.64	0	0.166667	0	#DIV/0!	0.00391197	-0.637
Q8BH34	Semaphorin-3D OS=Mus musculus GN=Sema3d PE=1 SV=1	SEM3D_MOUSE	Sema3d	0	0	0	0	0	1	0	0	0	0	0	0	0	0	0	0	0	0	0	0	0	0	0	0	0.00715955	-0.64	0	0.166667	0	#DIV/0!	0.00391197	-0.637
Q8BHZ0	Protein FAM49A OS=Mus musculus GN=Fam49a PE=2 SV=1	FA49A_MOUSE	Fam49a D12Ertd553e	0	0	0	0	0	1	0	0	0	0	0	0	0	0	0	0	0	0	0	0	0	0	0	0	0.00715955	-0.64	0	0.166667	0	#DIV/0!	0.00391197	-0.637
Q8BKJ9	NAD-dependent protein deacetylase sirtuin-7 OS=Mus musculus GN=Sirt7 PE=1 SV=2	SIR7_MOUSE	Sirt7 Sir2l7	0	0	0	0	0	1	0	0	0	0	0	0	0	0	0	0	0	0	0	0	0	0	0	0	0.00715955	-0.64	0	0.166667	0	#DIV/0!	0.00391197	-0.637
Q8BUM9	Isoform 2 of Ubiquitin carboxyl-terminal hydrolase 43 OS=Mus musculus GN=Usp43	UBP43_MOUSE	Usp43	0	0	0	0	0	1	0	0	0	0	0	0	0	0	0	0	0	0	0	0	0	0	0	0	0.00715955	-0.64	0	0.166667	0	#DIV/0!	0.00391197	-0.637
Q8BXT1	Regulator of G-protein signaling 8 OS=Mus musculus GN=Rgs8 PE=2 SV=1	RGS8_MOUSE	Rgs8	0	0	0	0	0	1	0	0	0	0	0	0	0	0	0	0	0	0	0	0	0	0	0	0	0.00715955	-0.64	0	0.166667	0	#DIV/0!	0.00391197	-0.637
Q8CD60	UPF0583 protein C15orf59 homolog OS=Mus musculus PE=2 SV=1	CO059_MOUSE	0	0	0	0	0	0	1	0	0	0	0	0	0	0	0	0	0	0	0	0	0	0	0	0	0	0.00715955	-0.64	0	0.166667	0	#DIV/0!	0.00391197	-0.637
Q8CH09	SURP and G-patch domain-containing protein 2 OS=Mus musculus GN=Sugp2 PE=2 SV=2	SUGP2_MOUSE	Sugp2 Sfrs14 Srsf14	0	0	0	0	0	1	0	0	0	0	0	0	0	0	0	0	0	0	0	0	0	0	0	0	0.00715955	-0.64	0	0.166667	0	#DIV/0!	0.00391197	-0.637
Q8R5F3	O-acetyl-ADP-ribose deacetylase 1 OS=Mus musculus GN=Oard1 PE=2 SV=2	OARD1_MOUSE	Oard1	0	0	0	0	0	1	0	0	0	0	0	0	0	0	0	0	0	0	0	0	0	0	0	0	0.00715955	-0.64	0	0.166667	0	#DIV/0!	0.00391197	-0.637
Q8VC49	Interferon alpha-inducible protein 27-like protein 2B OS=Mus musculus GN=Ifi27l2b PE=2 SV=1	IF27B_MOUSE	Ifi27l2b Isg12(b2)	0	0	0	0	0	1	0	0	0	0	0	0	0	0	0	0	0	0	0	0	0	0	0	0	0.00715955	-0.64	0	0.166667	0	#DIV/0!	0.00391197	-0.637
Q8VHJ7	Isoform 2 of Peroxisome proliferator-activated receptor gamma coactivator 1-beta OS=Mus musculus GN=Ppargc1b	PRGC2_MOUSE	Ppargc1b Errl1 Pgc1 Pgc1b Ppargc1	0	0	0	0	0	1	0	0	0	0	0	0	0	0	0	0	0	0	0	0	0	0	0	0	0.00715955	-0.64	0	0.166667	0	#DIV/0!	0.00391197	-0.637
[truncated: 1,360 more rows]
